# Supplementary material for: Ectomycorrhizal symbiosis shapes root exudation across discrete stages and phosphorus and nitrogen limitation in Pinus yunnanensis seedlings
Source: Research Square preprint supplement (doi:10.21203/rs.3.rs-7823971/v1), 2025-10-27
Supplement: Supplementary file 1 [file 3be091bf6b5aec9b05264d0f.pdf]

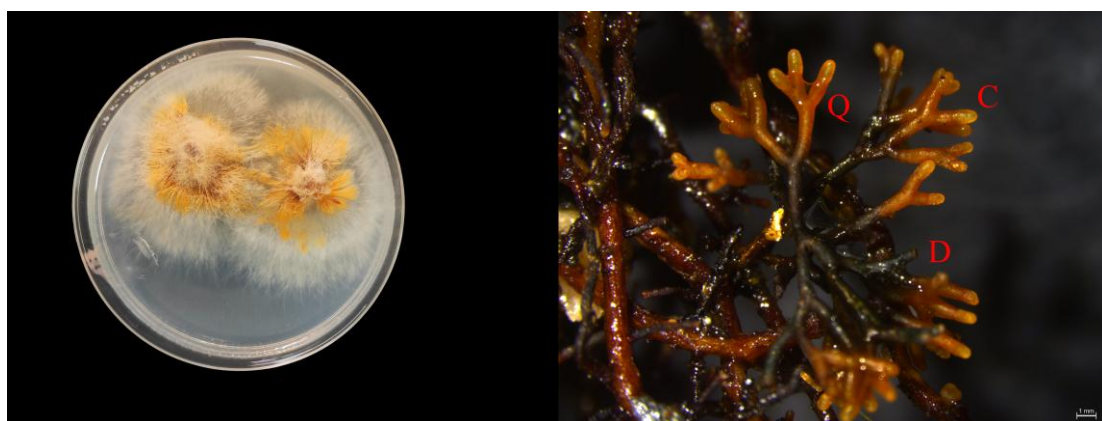

Figure S1 Morphological characteristics of mycelium and ectomycorrhiza of *Lactarius deliciosus*. Different types of EM including double (Dichotomic, D), Quadruple (Q) and Cluster (C) with more than four branches formed in this study (bar = 1 mm).

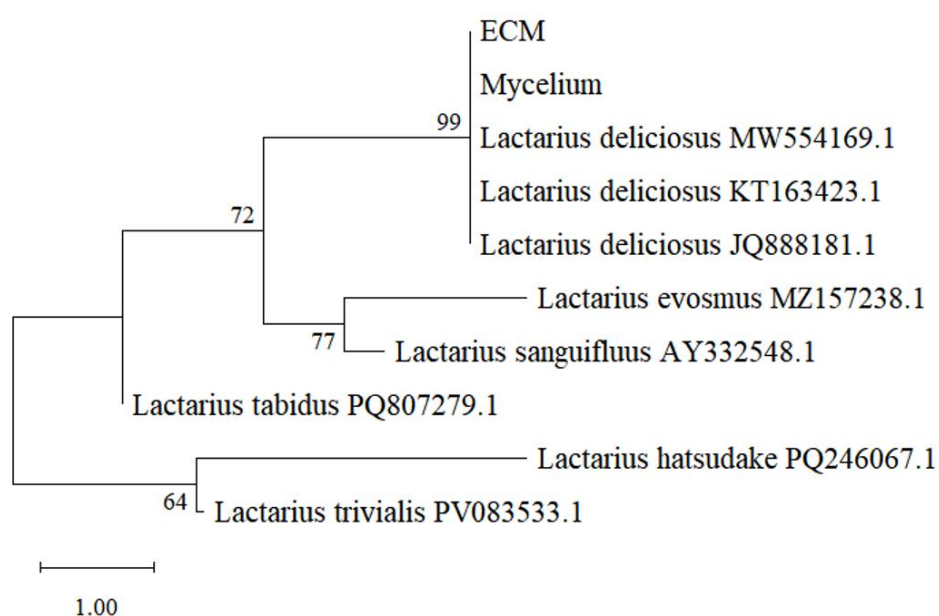

Figure S2 Phylogenetic tree based on ITS sequence matrix. ECM: ectomycorrhiza of *L. deliciosus*; Mycelium: *L. deliciosus* mycelium.

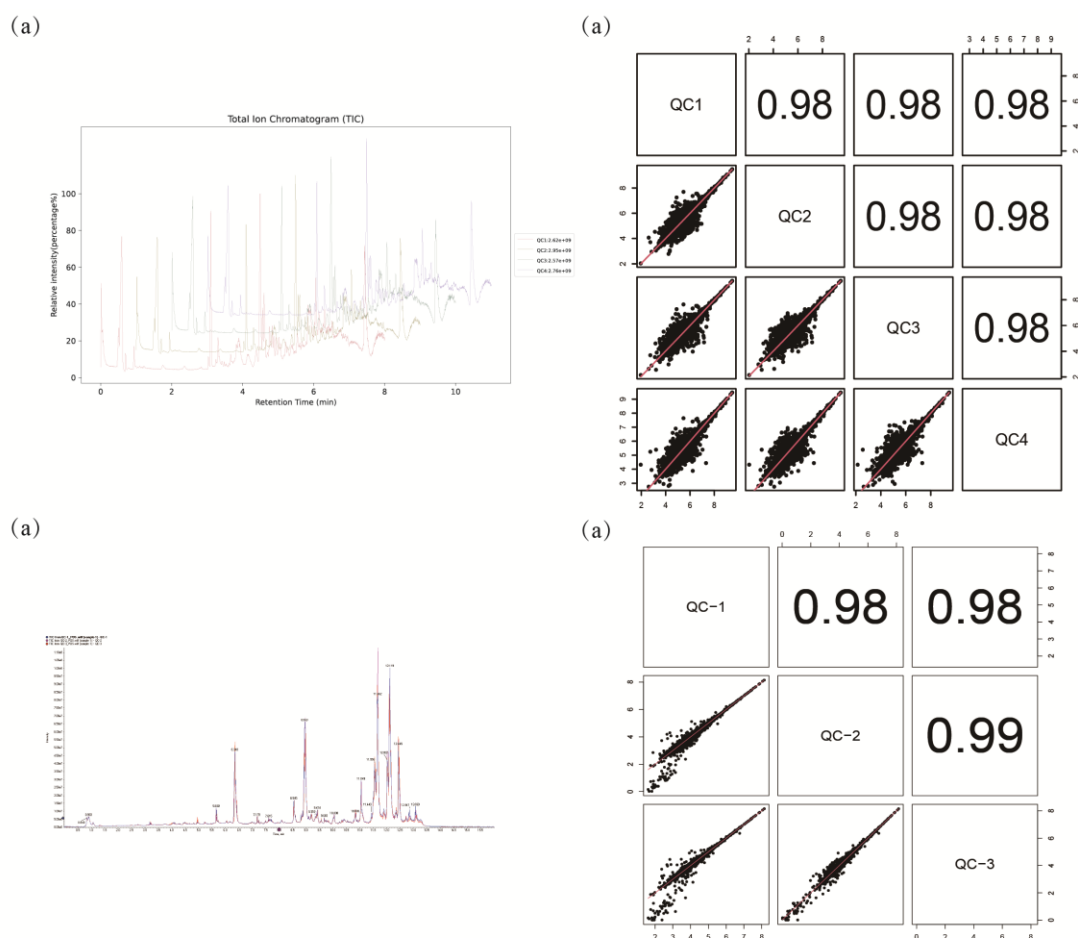

Figure S3 Comparison of QC mass spectrometry peak patterns and correlation analysis of QC.

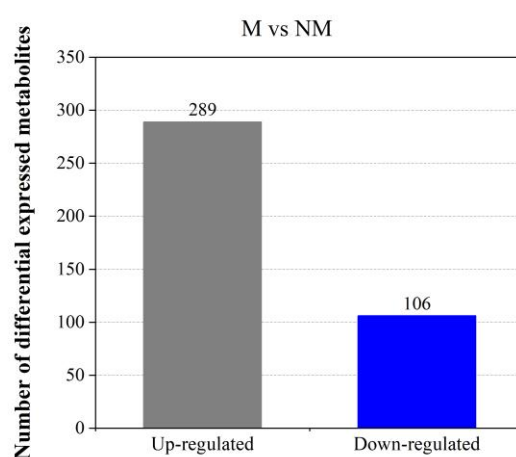

Figure S4 Differential expressed metabolites in root exudates of between mycorrhizal and non-mycorrhizal seedlings.

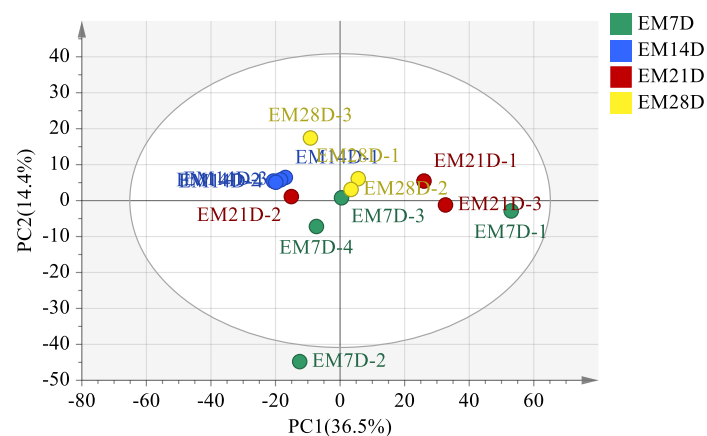

Figure S5 PCA score plot of metabolites in root exudates at different stages of EM development, under combined positive-negative ion mode.

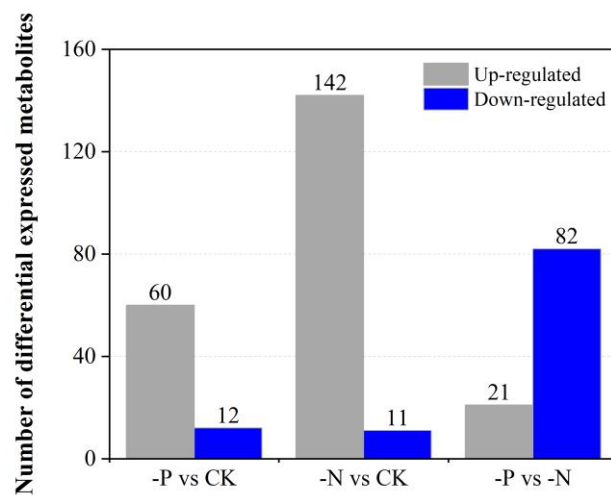

Figure S6 Up- and down-regulated metabolites in root exudates of *Pinus yunnanensis* seedlings under nitrogen-deficiency and phosphorus-deficiency conditions.
