# Supplementary material for: Ectomycorrhizal symbiosis shapes root exudation across discrete stages and phosphorus and nitrogen limitation in Pinus yunnanensis seedlings
Source: Research Square preprint supplement (doi:10.21203/rs.3.rs-7823971/v1), 2025-10-27
Supplement: Supplementary file 1 [file f262e86e8fa17d67389c7480.xlsx]

## Sheet: M vs NM
ID	RT [min]	m/z	Name	Reference Ion	Formula	InChI Key	Total score	HMDB ID	KEGG ID	Super_Class	Class	Sub_Class	KEGG class1	KEGG class2	KEGG class3	Level	M_1	M_2	M_3	M_4	NM_1	NM_2	NM_3	NM_4	QC1	QC2	QC3	QC4	RSD	mass
MP2987	0.705	134.081	(2r)-3-amino-2-hydroxy-3-methylbutanoic acid	[M+H]+	C5H11NO3	YNEGEPKXRPUBDF-VKHMYHEASA-N	94.2			Organic acids and derivatives	Carboxylic acids and derivatives	Amino acids, peptides, and analogues					2.49131e+06	7.35631e+06	6.99468e+06	4.57229e+06	2.20813e+07	5.49767e+06	1.99853e+06	1.38786e+06	6.31726e+06	6.28392e+06	6.1431e+06	6.31711e+06	0.0132468	133.074
MP453	0.625	76.0755	Trimethylamine N-oxide	[M+H-H2O]+	C3H9NO	UYPYRKYUKCHHIB-UHFFFAOYSA-N	93.8	HMDB0000925	C01104	Organic nitrogen compounds	Organonitrogen compounds	Aminoxides					2.11414e+07	4.12858e+07	4.33427e+07	3.34431e+07	7.37033e+07	4.97622e+07	6.05011e+07	8.50343e+07	5.43371e+07	5.40562e+07	5.38341e+07	5.38973e+07	0.00415252	75.0684
MP2848	3.29	130.159	1,1-Dibutyl-3-(3-chloro-2-methylphenyl)urea	[M+H]+	C16H25ClN2O	BUKYPLDYWBEYRI-UHFFFAOYSA-N	93.7			Benzenoids	Benzene and substituted derivatives	N-phenylureas					7.54658e+06	9.69337e+06	1.14676e+07	8.33111e+06	7.18139e+06	9.52074e+06	7.76876e+06	1.37165e+07	9.4171e+06	9.64234e+06	9.97311e+06	9.41924e+06	0.0272898	296.166
MP4643	4.245	171.149	2-Amino-3-methyl-1-pyrrolidin-1-yl-butan-1-one	[M+H]+	C9H18N2O	IHBAVXVTGLANPI-UHFFFAOYSA-N	93.3	HMDB0246938		Organic acids and derivatives	Carboxylic acids and derivatives	Amino acids, peptides, and analogues					4.22468e+06	3.45306e+06	5.66096e+06	7.35802e+06	3.47064e+06	2.55719e+06	5.51675e+06	2.35875e+06	4.20725e+06	4.20761e+06	4.17864e+06	4.10703e+06	0.0113507	170.142
MP7856	4.721	241.133	2-Amino-N-(3,5-dimethylphenyl)benzamide	[M+Na]+	C15H16N2O	BHJUDUUCXPTBQC-UHFFFAOYSA-N	93.3										2.21411e+06	4.00284e+06	4.19949e+06	2.8978e+06	9.02982e+06	4.28021e+06	3.61793e+06	4.86759e+06	4.70075e+06	4.55143e+06	4.38437e+06	4.65204e+06	0.030571	240.126
MP2920	1.1	132.102	2-Methylnorvaline	[M+NH4]+	C6H13NO2	HBJGLYBWNNQMOW-LURJTMIESA-N	93.3										5.23207e+06	4.15255e+07	3.14901e+07	1.54563e+07	1.87715e+07	5.39214e+07	1.65777e+07	1.50056e+07	2.50655e+07	2.49116e+07	2.49116e+07	2.49196e+07	0.00303316	131.095
MP2919	1.045	132.102	beta-Alanylleucine	[M+NH4]+	C9H18N2O3		93.3										4.90403e+06	2.7847e+07	1.90501e+07	8.96983e+06	1.10183e+07	3.43496e+07	9.36695e+06	8.6372e+06	1.54761e+07	1.52484e+07	1.52485e+07	1.52482e+07	0.00743875	202.132
MP2399	0.835	118.086	Isovaline	[M+NH4]+	C5H11NO2	GCHPUFAZSONQIV-UHFFFAOYSA-N	93.3			Organic acids and derivatives	Carboxylic acids and derivatives	Amino acids, peptides, and analogues					5.53645e+06	1.08709e+07	6.21026e+06	3.83213e+06	3.97502e+06	1.01422e+07	3.36302e+06	3.30633e+06	5.99991e+06	5.94816e+06	5.90928e+06	5.93345e+06	0.0064424	117.079
MP1829	0.709	104.07	N,N-Dimethylglycine	[M+CH3OH+H]+	C4H9NO2	FFDGPVCHZBVARC-UHFFFAOYSA-N	93.3	HMDB0000092	C01026	Organic acids and derivatives	Carboxylic acids and derivatives	Amino acids, peptides, and analogues					2.84386e+06	4.94955e+06	3.61825e+06	3.58697e+06	7.23354e+06	3.57291e+06	1.53485e+06	1.65364e+06	3.77427e+06	3.86635e+06	3.65501e+06	3.82275e+06	0.0241238	103.063
MP307	0.654	74.0963	Diethylamine	[M+H]+	C4H11N	HPNMFZURTQLUMO-UHFFFAOYSA-N	93.3	HMDB0041878	C14422	Organic nitrogen compounds	Organonitrogen compounds	Amines					3.76848e+06	4.27384e+06	3.7166e+06	2.50196e+06	3.35398e+06	3.68984e+06	3.84525e+06	5.41639e+06	3.99037e+06	3.99161e+06	3.94841e+06	3.82845e+06	0.019505	73.0891
MP3209	0.706	139.05	2-Aminonicotinic acid	[M+H]+	C6H6N2O2	KPIVDNYJNOPGBE-UHFFFAOYSA-N	93.3	HMDB0061680		Organoheterocyclic compounds	Pyridines and derivatives	Pyridinecarboxylic acids and derivatives					1.96402e+07	2.41876e+07	2.695e+07	2.13086e+07	3.21006e+06	1.32276e+07	1.49001e+06	2.61107e+06	1.26389e+07	1.26823e+07	1.22909e+07	1.25875e+07	0.0141016	138.043
MP11514	5.537	326.081	1-(2,4-Dichlorophenyl)-4,4-dimethyl-2-(1H-1,2,4-triazol-1-yl)-3-pentanone	[M+H-H2O]+	C15H17Cl2N3O		93.2										1.02369e+08	1.50442e+08	1.12606e+08	5.59491e+07	2.67055e+07	1.9795e+07	2.03732e+07	3.40893e+07	6.74447e+07	6.52675e+07	6.52673e+07	6.53918e+07	0.0162431	325.075
MP8843	5.658	262.179	Lycoposerramine K	[M+H]+	C16H23NO2	ZRXLWHIBVCSJGF-SUPODQJDSA-N	93.2			Lipids and lipid-like molecules	Prenol lipids	Sesquiterpenoids					3.70507e+07	3.26675e+07	3.4842e+07	3.57126e+07	4.56328e+07	5.41244e+07	2.67843e+07	3.69923e+07	3.77198e+07	3.77181e+07	3.70446e+07	3.77208e+07	0.00898664	261.173
MP7129	4.965	225.195	1,3-Dicyclohexylurea	[M+H]+	C13H24N2O	ADFXKUOMJKEIND-UHFFFAOYSA-N	93.2	HMDB0244166		Organic acids and derivatives	Organic carbonic acids and derivatives	Ureas					6.23382e+07	7.93854e+07	8.55823e+07	7.28928e+07	1.0325e+08	6.83837e+07	5.98702e+07	5.64782e+07	7.48445e+07	7.39742e+07	7.3601e+07	7.36007e+07	0.00792665	224.189
MP13844	5.004	388.13	Dimethomorph	[2M+NH4]+	C21H22ClNO4	QNBTYORWCCMPQP-UHFFFAOYSA-N	93.1		C18583	Benzenoids	Benzene and substituted derivatives	Diphenylmethanes					6.96732e+07	5.6664e+07	1.62691e+08	1.45202e+08	6.57026e+07	8.25267e+07	5.98794e+07	3.12631e+07	9.92956e+07	9.93716e+07	8.61117e+07	9.70519e+07	0.0662378	387.124
MP5695	2.868	194.117	5-Phenylnorvaline	[M+H]+	C11H15NO2	XOQZTHUXZWQXOK-UHFFFAOYSA-N	93										2.6905e+07	3.26913e+07	4.69018e+07	5.38862e+07	4.54071e+07	3.07786e+07	3.06693e+07	2.87235e+07	3.59535e+07	3.59532e+07	3.53626e+07	3.53578e+07	0.00960486	193.11
MP1217	0.687	90.0547	Sarcosine	[M+CH3OH+H]+	C3H7NO2	FSYKKLYZXJSNPZ-UHFFFAOYSA-N	93	HMDB0000271	C00213	Organic acids and derivatives	Carboxylic acids and derivatives	Amino acids, peptides, and analogues					2.77543e+06	4.08214e+06	3.80243e+06	4.15308e+06	6.4492e+06	3.33336e+06	2.1626e+06	2.14158e+06	3.73393e+06	3.75815e+06	3.57068e+06	3.75852e+06	0.024423	89.0477
MP3566	5.674	147.08	PHENYLBUTYRIC ACID	[M+H]+	C10H12O2	IGVPBCZDHMIOJH-UHFFFAOYSA-N	92.9	HMDB0041612		Benzenoids	Phenol esters						183348	49211.1	3.40738e+06	228488	5.9027e+06	4.80194e+06	1.15869e+06	3.13184e+06	2.33945e+06	2.26836e+06	2.26234e+06	2.26338e+06	0.0164102	164.084
MP7086	3.1	224.128	4-Hydroxybenzoylcholine	[M]+	C12H18NO3	BAPAICNRGIBFJT-UHFFFAOYSA-O	92.8	HMDB0029559		Benzenoids	Benzene and substituted derivatives	Benzoic acids and derivatives					1.68026e+07	1.1808e+07	1.79123e+07	1.23015e+07	2.88455e+07	1.63579e+07	2.07385e+07	1.98357e+07	1.13245e+07	1.23785e+07	8.74592e+06	1.3802e+07	0.184619	224.129
MP6860	4.1	219.174	2,6-di-tert-butyl-4-(morpholin-4-ylmethyl)phenol	[M+H]+	C19H31NO2	KWGUJRCPGGSTKB-UHFFFAOYSA-N	92.8			Benzenoids	Benzene and substituted derivatives	Phenylpropanes					340570	2.15383e+06	2.72136e+06	2.76877e+06	1.87073e+06	1.69298e+06	3.36319e+06	3.29851e+06	2.00789e+06	2.08107e+06	1.95539e+06	1.99287e+06	0.0262235	305.235
MP4124	0.652	159.076	3-(1-hydroxyethyl)-3,6-dihydropyrazine-2,5-diol	[M+H]+	C6H10N2O3	QPENGVPAWUAJDV-UHFFFAOYSA-N	92.8			Organic acids and derivatives	Carboxylic acids and derivatives	Amino acids, peptides, and analogues					72001.6	406037	2.56072e+06	353216	1.83903e+07	291668	45712.9	167262	2.93846e+06	2.96209e+06	2.91136e+06	2.91239e+06	0.0082493	158.069
MP10484	4.81	300.289	(-)-threo-sphingosine	[M+H]+	C18H37NO2	WWUZIQQURGPMPG-NVGHFZOBSA-N	92.8			Organic nitrogen compounds	Organonitrogen compounds	Amines					1.81059e+06	1.35431e+06	1.52492e+06	1.328e+06	1.73775e+06	991401	1.27385e+06	1.13733e+06	1.40702e+06	1.40779e+06	1.36901e+06	1.37895e+06	0.0141814	299.282
MP2322	0.656	116.07	Pro-Pro	[M+NH4]+	C10H16N2O3	RWCOTTLHDJWHRS-YUMQZZPRSA-N	92.7	HMDB0011180		Organic acids and derivatives	Carboxylic acids and derivatives	Amino acids, peptides, and analogues					2.59224e+06	2.98156e+06	2.20942e+06	1.96201e+06	2.28494e+06	3.79202e+06	1.92371e+06	1.79684e+06	2.38562e+06	2.3913e+06	2.41026e+06	2.44462e+06	0.0110541	212.116
MP9104	0.964	268.104	Adenosine	[M+H]+	C10H13N5O4	OIRDTQYFTABQOQ-UHFFFAOYSA-N	92.7	HMDB0000050	C00212	Nucleosides, nucleotides, and analogues	Purine nucleosides		Nucleic acids	Nucleosides	Ribonucleosides		2.34267e+07	2.72049e+07	2.15672e+07	1.6552e+07	3.4212e+07	1.71984e+07	1.18897e+07	9.6023e+06	1.95982e+07	1.84357e+07	1.95962e+07	1.95956e+07	0.0300673	267.097
MP2735	0.636	127.072	Melamine	[M+H]+	C3H6N6	JDSHMPZPIAZGSV-UHFFFAOYSA-N	92.7	HMDB0041922	C08737	Organoheterocyclic compounds	Triazines	1,3,5-triazines					976096	248757	788226	1.01406e+06	549678	1.28683e+06	1.04233e+06	1.46868e+06	938365	954449	928953	928718	0.0128885	126.065
MP3423	0.67	144.102	1-[3-(Acetylsulfanyl)propanoyl]-6-methyl-2-piperidinecarboxylic acid	[M+ACN+H]+	C12H19NO4S	JHFOAISYWJRTIM-UHFFFAOYSA-N	92.7										5.49106e+06	4.35061e+06	3.05323e+06	2.85772e+06	1.90049e+06	2.3642e+06	1.79921e+06	1.75242e+06	2.76682e+06	2.71347e+06	2.77889e+06	2.75203e+06	0.0103282	273.103
MP2803	0.615	129.102	Pipecolamide	[M+ACN+H]+	C6H12N2O	XIMBESZRBTVIOD-UHFFFAOYNA-N	92.6										6.07398e+06	5.34674e+06	1.04571e+07	9.64206e+06	2.87614e+06	4.57983e+06	4.5199e+06	3.19292e+06	6.51978e+06	6.51983e+06	6.2781e+06	6.45734e+06	0.0177381	128.095
MP2839	0.866	130.05	carglumic acid	[M+NH4]+	C6H10N2O5	LCQLHJZYVOQKHU-VKHMYHEASA-N	92.6	HMDB0015673	C05829	Organic acids and derivatives	Carboxylic acids and derivatives	Amino acids, peptides, and analogues					4.90685e+06	3.5412e+06	2.03585e+06	3.4621e+06	900090	2.55543e+06	809518	747951	2.56948e+06	2.4102e+06	2.56959e+06	2.56954e+06	0.0314924	190.059
MP5418	3.057	188.07	N-Formyltryptophan	[2M+H]+	C12H12N2O3	RNEMLJPSSOJRHX-NSHDSACASA-N	92.6			Organic acids and derivatives	Carboxylic acids and derivatives	Amino acids, peptides, and analogues					905564	2.44303e+06	1.66613e+06	689803	805132	3.7424e+06	623463	406131	1.39539e+06	1.43595e+06	1.37376e+06	1.38214e+06	0.019738	232.085
MP6509	4.087	212.118	N,N'-Diphenylguanidine	[M+H]+	C13H13N3	OWRCNXZUPFZXOS-UHFFFAOYSA-N	92.6			Benzenoids	Benzene and substituted derivatives						402628	706747	599078	640827	3.45887e+06	2.06136e+07	75853.5	8.78564e+06	356703	357265	356653	369321	0.0173059	211.111
MP1000	1.095	86.0598	N-ACETYLALANINE	[M+H]+		KTHDTJVBEPMMGL-VKHMYHEASA-N	92.6	HMDB0000766		Organic acids and derivatives	Carboxylic acids and derivatives	Amino acids, peptides, and analogues					5.53877e+06	7.58124e+06	1.22407e+07	7.61916e+06	8.94693e+06	916460	5.61161e+06	4.93256e+06	7.37312e+06	7.28133e+06	7.28095e+06	7.65652e+06	0.024024
MP2397	0.632	118.086	3-Aminopentanoic acid	[M+H]+	C5H11NO2	QFRURJKLPJVRQY-UHFFFAOYSA-N	92.5			Organic acids and derivatives	Carboxylic acids and derivatives	Amino acids, peptides, and analogues					7.9073e+07	1.05235e+08	5.05241e+07	4.53353e+07	3.05667e+07	1.09196e+08	1.77572e+07	1.77272e+07	5.6561e+07	5.65604e+07	5.61264e+07	5.64113e+07	0.00362897	117.079
MP11065	5.659	315.195	Potamogetonin	[M+H]+	C20H26O3	GWSYJSBQYQWLDU-UHFFFAOYSA-N	92.5			Lipids and lipid-like molecules	Prenol lipids	Terpene lactones					1.47796e+07	2.86532e+06	1.1194e+07	4.34757e+06	4.81514e+06	1.23584e+06	1.30691e+06	1.66927e+06	5.16106e+06	5.16135e+06	5.24243e+06	5.18357e+06	0.00739504	314.188
MP449	0.696	76.0391	Acetohydroxamic acid	[M+H]+	C2H5NO2	RRUDCFGSUDOHDG-UHFFFAOYSA-N	92.5	HMDB0014691	C06808	Organic acids and derivatives	Carboxylic acids and derivatives	Carboxylic acid derivatives					4.99801e+06	7.23156e+06	6.05541e+06	3.84052e+06	6.21662e+06	2.06614e+06	1.22749e+07	6.47287e+06	6.73668e+06	5.78871e+06	5.82447e+06	5.79708e+06	0.0773394	75.032
MP3293	3.719	141.054	2-ETHYL-3-HYDROXY-4H-PYRAN-4-ONE	[M+H]+	C7H8O3	YIKYNHJUKRTCJL-UHFFFAOYSA-N	92.4			Organoheterocyclic compounds	Pyrans	Pyranones and derivatives					1.41823e+07	3.78495e+07	2.38768e+07	3.87879e+07	3.22932e+07	5.36757e+07	2.87178e+07	4.83114e+07	3.19506e+07	3.32798e+07	3.19529e+07	3.20242e+07	0.0202121	140.047
MP2208	3.445	113.096	4-(Hydroxymethyl)cyclohexanol	[M+H]+	C7H14O2	VGRZISGVNOKTQU-UHFFFAOYSA-N	92.4			Organic oxygen compounds	Organooxygen compounds	Alcohols and polyols					1.1073e+07	9.71918e+06	9.31928e+06	8.18748e+06	8.37027e+06	1.01724e+07	8.59959e+06	8.61862e+06	1.00157e+07	1.01804e+07	1.00952e+07	1.00524e+07	0.00702525	130.099
MP8458	6.617	254.247	1-Dodecyl-2-pyrrolidinone	[M+H]+	C16H31NO	NJPQAIBZIHNJDO-UHFFFAOYSA-N	92.4			Organoheterocyclic compounds	Pyrrolidines	N-alkylpyrrolidines					4.18284e+06	3.68278e+06	3.59348e+06	3.70122e+06	4.5689e+06	6.3215e+06	4.9147e+06	6.30388e+06	4.48546e+06	4.48575e+06	4.33668e+06	4.48502e+06	0.0167184	253.241
MP7432	3.123	231.17	Ile-val	[M+ACN+H]+	C11H22N2O3	BCXBIONYYJCSDF-IWSPIJDZSA-N	92.3	HMDB0028920		Organic acids and derivatives	Carboxylic acids and derivatives	Amino acids, peptides, and analogues					464813	2.82918e+06	2.89343e+06	1.88896e+06	1.38919e+06	1.44841e+06	1.40563e+06	813004	1.70256e+06	1.63002e+06	1.62993e+06	1.63005e+06	0.0220119	230.163
MP303	0.629	74.0712	Methylguanidine	[M+H]+	C2H7N3	CHJJGSNFBQVOTG-UHFFFAOYAF	92.3	HMDB0001522	C02294	Organic nitrogen compounds	Organonitrogen compounds	Guanidines					2.96343e+06	2.24803e+06	2.48402e+06	3.91668e+06	3.08124e+06	4.00858e+06	3.69636e+06	3.77839e+06	2.95016e+06	2.95672e+06	2.9567e+06	2.94441e+06	0.00200858	73.064
MP9985	4.737	288.289	Methyl palmitate	[M+H]+	C17H34O2	FLIACVVOZYBSBS-UHFFFAOYSA-N	92.3	HMDB0061859	C16995	Lipids and lipid-like molecules	Fatty Acyls	Fatty acid esters	Lipids	FA Fatty acyls	FA07 Fatty esters		4.37e+07	4.79962e+07	1.99084e+07	5.16209e+07	4.89683e+07	3.75015e+07	5.32679e+07	3.45985e+07	289707	4.91408e+07	4.35857e+07	4.35617e+07	0.665464	270.256
MP2149	3.315	112.075	Ethyl nipecotate	[M+H]+	C8H15NO2	XIWBSOUNZWSFKU-UHFFFAOYSA-N	92.2			Organoheterocyclic compounds	Piperidines	Piperidinecarboxylic acids and derivatives					4.71584e+06	3.67026e+06	4.31881e+06	6.82277e+06	6.89832e+06	9.13415e+06	1.13668e+06	4.56813e+06	5.24981e+06	5.34017e+06	5.33966e+06	5.07685e+06	0.0236146	157.11
MP1834	0.611	104.107	Choline	[M]+	C5H14NO	OEYIOHPDSNJKLS-UHFFFAOYSA-N	92.2	HMDB0000097	C00114	Organic nitrogen compounds	Organonitrogen compounds	Quaternary ammonium salts					1.55108e+07	4.23034e+07	1.55862e+07	1.29789e+07	1.89322e+07	1.51137e+07	1.00635e+07	7.61477e+06	1.68843e+07	1.69145e+07	1.70716e+07	1.69656e+07	0.00484808	104.108
MP1671	0.714	100.075	bromamide	[M+H]+	C11H15BrN2O	ICBQXEWYZVQCFH-UHFFFAOYSA-N	92.2										1.67905e+08	1.73382e+08	1.18675e+08	7.27704e+07	1.02779e+08	1.63948e+08	1.7153e+08	7.46426e+07	1.21995e+08	1.03462e+08	1.10001e+08	1.12703e+08	0.0686126	270.037
MP2469	1.727	120.08	p-Xylylenediamine	[M+H]+	C8H12N2	ISKQADXMHQSTHK-UHFFFAOYSA-N	92.1			Benzenoids	Benzene and substituted derivatives	Phenylmethylamines					129126	913273	697130	331694	417035	1.49534e+06	385487	348282	609562	620553	645657	609449	0.0274417	136.1
MP1673	1.359	100.112	4-Methylleucine	[M+H]+	C7H15NO2	LPBSHGLDBQBSPI-YFKPBYRVSA-N	92			Organic acids and derivatives	Carboxylic acids and derivatives	Amino acids, peptides, and analogues					1.39269e+06	2.16615e+06	2.29216e+06	2.27727e+06	1.57381e+06	843626	1.02176e+06	1.08519e+06	1.57098e+06	1.60343e+06	1.57099e+06	1.57575e+06	0.0098661	145.11
MP3380	0.655	143.081	Ectoine	[M+H]+	C6H10N2O2	WQXNXVUDBPYKBA-YFKPBYRVSA-N	91.9	HMDB0240650	C06231	Organic acids and derivatives	Carboxylic acids and derivatives	Amino acids, peptides, and analogues					2.48438e+06	1.96322e+06	1.75319e+06	1.72421e+06	2.37784e+06	2.38003e+06	1.77972e+06	2.1208e+06	2.27844e+06	2.27859e+06	2.26299e+06	2.22991e+06	0.0101273	142.074
MP2109	0.683	111.055	3-Methyl-1H-pyrazole-5-carbaldehyde	[M+Na]+	C5H6N2O	CZAZDIRRZHGKBI-UHFFFAOYSA-N	91.9			Organic oxygen compounds	Organooxygen compounds	Carbonyl compounds					549470	402387	318130	395891	348924	681098	249072	316063	474041	466460	473803	433334	0.0419407	110.048
MP6988	3.074	222.112	(-)-Ecgonine methyl ester	[M+H]+	C10H17NO3	QIQNNBXHAYSQRY-ABIFROTESA-N	91.9	HMDB0006406	C12448	Alkaloids and derivatives	Tropane alkaloids		Alkaloids	Alkaloids derived from ornithine	Tropane alkaloids		3.023e+06	3.50776e+06	5.35243e+06	1.76651e+06	3.15213e+06	3.75568e+06	3.12618e+06	3.54756e+06	4.01334e+06	2.8543e+06	3.99679e+06	3.77189e+06	0.149684	199.121
MP4254	0.709	162.112	L-Carnitine	[M+H]+	C7H16NO3	PHIQHXFUZVPYII-ZCFIWIBFSA-O	91.8	HMDB0000062	C00487	Organic nitrogen compounds	Organonitrogen compounds	Quaternary ammonium salts					2.70206e+06	2.64602e+06	3.18818e+06	2.49576e+06	4.17152e+06	3.28688e+06	4.0693e+06	2.62272e+06	2.94187e+06	2.95311e+06	925084	3.04663e+06	0.417079	162.113
MP7327	4.651	229.085	n.a.	[M+H]+	C14H12O3	HXRBQSOSCSKMTM-UHFFFAOYSA-N	91.8	HMDB0000588	C01330	Benzenoids	Naphthalenes	Naphthoquinones					3.55715e+06	4.09975e+06	4.35427e+06	4.036e+06	170972	81403.7	198586	228743	2.19966e+06	2.2128e+06	2.22232e+06	2.19965e+06	0.00499963	228.079
MP3644	6.032	149.023	Phthalic anhydride	[M+H]+	C8H4O3	LGRFSURHDFAFJT-UHFFFAOYSA-N	91.8	HMDB0256501		Organoheterocyclic compounds	Benzofurans	Benzofuranones					1.984e+07	1.95236e+07	1.92908e+07	1.89764e+07	1.98538e+07	2.11694e+07	1.95336e+07	2.17628e+07	1.98466e+07	1.9936e+07	1.99357e+07	1.96644e+07	0.00644689	148.016
MP1003	1.045	86.0962	N-Methylpyrrolidine	[M+H]+	C5H11N	AVFZOVWCLRSYKC-UHFFFAOYSA-N	91.7	HMDB0243946		Organoheterocyclic compounds	Pyrrolidines	N-alkylpyrrolidines					890895	4.37712e+06	3.02238e+06	1.64385e+06	1.83666e+06	5.31325e+06	1.57271e+06	1.4745e+06	2.5544e+06	2.54837e+06	2.58419e+06	2.48358e+06	0.0166645	85.0891
MP8105	3.312	246.169	Valerylcarnitine	[M+H]+	C12H23NO4	VSNFQQXVMPSASB-JTQLQIEISA-N	91.7	HMDB0013128		Lipids and lipid-like molecules	Fatty Acyls	Fatty acid esters					2.81879e+06	1.4204e+06	1.45837e+06	1.72012e+06	793085	798412	469206	356255	1.17549e+06	1.21461e+06	1.15591e+06	1.1353e+06	0.0288615	245.163
MP4958	7.355	178.122	ethcathinone	[M+ACN+H]+	C11H15NO	LYMHIBZGTAPASQ-UHFFFAOYSA-N	91.7		C22705	Organic oxygen compounds	Organooxygen compounds	Carbonyl compounds					2.34292e+07	2.83823e+07	1.17494e+07	9.73335e+06	1.67371e+07	3.33897e+07	3.19066e+07	3.07786e+07	3.3086e+07	3.19627e+07	3.036e+07	3.15365e+07	0.0354952	177.115
MP3799	0.705	152.107	Cathine	[M+Na]+	C9H13NO	DLNKOYKMWOXYQA-IONNQARKSA-N	91.7	HMDB0249705	C08300	Benzenoids	Benzene and substituted derivatives	Phenylpropanes	Alkaloids	Alkaloids derived by amination reactions	Phenylalanine derived alkaloids		168381	1.23579e+06	4.62662e+06	472698	5.57735e+06	291353	340982	346850	1.66909e+06	1.66903e+06	1.60973e+06	1.66906e+06	0.0179318	151.1
MP6565	4.583	213.102	cordysinin c	[M+H]+	C13H12N2O	GKXWQOGSNJJLKJ-QMMMGPOBSA-N	91.7			Alkaloids and derivatives	Harmala alkaloids						2.12827e+06	3.96706e+06	4.47284e+06	2.83277e+06	7.73673e+06	4.45625e+06	2.92655e+06	4.49004e+06	4.51542e+06	4.31655e+06	4.30243e+06	4.30243e+06	0.0239391	212.095
MP2250	3.247	114.091	4-Aminomethyl-4-fluoro-tetrahydro-2H-pyran	[M+Na]+	C6H12FNO	OFAYDVVDQZEUIY-UHFFFAOYSA-N	91.7										1.39819e+07	1.44296e+07	1.91556e+07	1.8203e+07	2.02185e+07	1.62708e+07	9.91595e+06	1.13846e+07	2.12465e+07	2.27538e+07	2.35967e+07	2.35579e+07	0.0482287	133.09
MP11173	5.565	317.21	4-[(E)-2-[(1R,3S,4aS,8aS)-3-hydroxy-5,5,8a-trimethyl-2-methylidene-3,4,4a,6,7,8-hexahydro-1H-naphthalen-1-yl]ethenyl]-2H-furan-5-one	[M+H]+	C20H28O3	KJCLDWYEUKTPNA-ZRSLWSEBSA-N	91.5			Lipids and lipid-like molecules	Prenol lipids	Diterpenoids					2.08899e+07	4.50382e+06	1.90189e+07	7.53685e+06	4.61696e+06	1.02432e+06	2.10076e+06	3.71757e+06	7.93902e+06	7.24116e+06	8.15542e+06	8.78794e+06	0.0794306	316.204
MP9524	4.763	277.179	Shogaol	[M+NH4]+	C17H24O3	OQWKEEOHDMUXEO-BQYQJAHWSA-N	91.5	HMDB0031463	C10494	Benzenoids	Phenols	Methoxyphenols	Lipids	PK Polyketides	PK15 Phenolic lipids		1.13469e+08	2.48075e+07	3.11787e+07	1.85941e+07	3.20693e+07	1.34696e+07	1.04766e+07	2.5161e+07	3.45106e+07	3.42553e+07	3.42561e+07	3.45035e+07	0.00422167	276.173
MP4423	3.494	166.086	p-Acetanisidine	[M+H]+	C9H11NO2	XVAIDCNLVLTVFM-UHFFFAOYSA-N	91.4	HMDB0255013		Benzenoids	Benzene and substituted derivatives	Anilides					14772.2	11489	104702	143569	8606.79	1.01581e+06	665126	800469	345547	345694	352731	372019	0.0352348	165.079
MP1828	0.933	104.07	2-(ethylamino)acetic acid	[M+H]+	C4H9NO2	YPIGGYHFMKJNKV-UHFFFAOYSA-N	91.3	HMDB0041945	C11735	Organic acids and derivatives	Carboxylic acids and derivatives	Amino acids, peptides, and analogues					1.38231e+06	1.9032e+06	2.12053e+06	1.81852e+06	3.5412e+06	1.38383e+06	1.14727e+06	1.11496e+06	1.80569e+06	1.84243e+06	1.79184e+06	1.79208e+06	0.0131863	103.063
MP6713	3.181	216.074	N-(2-Hydroxyethyl)-2-(3-nitro-1H-1,2,4-triazol-1-yl)acetamide	[M+ACN+H]+	C6H9N5O4	CGPOHMMXMBLSOS-UHFFFAOYSA-N	91.2										2.30145e+06	3.73778e+06	4.32108e+06	3.88064e+06	299636	224908	232703	133386	1.61532e+06	1.8118e+06	1.80698e+06	1.77504e+06	0.0529335	215.065
MP3120	3.823	137.059	4-Hydroxyacetophenone	[M+H]+	C8H8O2	TXFPEBPIARQUIG-UHFFFAOYSA-N	91.2		C10700	Organic oxygen compounds	Organooxygen compounds	Carbonyl compounds					7.65247e+06	8.49889e+06	1.57378e+07	1.2113e+07	9.61376e+06	6.36198e+06	5.92698e+06	1.06481e+07	9.47118e+06	9.44346e+06	9.44346e+06	9.44678e+06	0.00141753	136.052
MP10529	5.878	301.215	2-isopropyl-4b,8,8-trimethyl-5,6,7,8a-tetrahydrophenanthrene-3,10-diol	[M+H]+	C20H28O2	UIJOYOSDYSTACV-UHFFFAOYSA-N	91.2			Lipids and lipid-like molecules	Prenol lipids	Diterpenoids					1.30142e+08	5.26051e+07	1.05817e+08	6.48248e+07	6.22213e+07	1.04011e+07	7.98142e+06	3.67256e+07	6.0163e+07	6.06896e+07	5.93583e+07	6.0681e+07	0.0104089	300.209
MP9446	4.786	275.164	4-ethoxy-3,4a,5-trimethyl-2H,4H,4aH,5H,6H,7H-naphtho[2,3-b]furan-2-one	[M+H]+	C17H22O3	NVLKRIFJOPPSSC-UHFFFAOYSA-N	91.2			Lipids and lipid-like molecules	Prenol lipids	Terpene lactones					3.21402e+06	1.95943e+06	2.64156e+06	1.21906e+06	2.31566e+06	1.08645e+06	682927	1.77426e+06	1.98637e+06	1.939e+06	1.92311e+06	1.96118e+06	0.0140845	274.157
MP306	6.989	74.0962	Isobutylamine	[M+H]+	C4H11N	KDSNLYIMUZNERS-UHFFFAOYSA-N	91.2	HMDB0034198	C02787	Organic nitrogen compounds	Organonitrogen compounds	Amines					746698	836833	2.26905e+07	6.49111e+06	20337.1	8.23552e+06	3.74968e+06	53388.3	4.90713e+06	4.93874e+06	70688.5	4.88073e+06	0.653959	73.0891
MP4086	4.962	158.154	N-Isobutyl-3-methylbutanamide	[M+CH3OH+H]+	C9H19NO		91.1										6.94045e+06	7.54162e+06	7.35561e+06	7.48878e+06	7.37159e+06	7.37106e+06	7.43749e+06	7.40555e+06	7.57435e+06	7.2881e+06	7.28599e+06	7.28914e+06	0.0194726	157.147
MP1667	1.23	100.039	AC-GLY-NHME	[M+H]+	C5H10N2O2	FJMAXCRRCJSCIE-UHFFFAOYSA-N	91.1			Organic acids and derivatives	Carboxylic acids and derivatives	Amino acids, peptides, and analogues					1.03241e+06	694113	1.83695e+06	1.76227e+06	226194	746994	1.41794e+06	442621	1.00869e+06	992666	1.01445e+06	1.01619e+06	0.0106275	130.074
MP1931	4.063	107.07	Diethylene glycol	[M+H-H2O]+	C4H10O3	MTHSVFCYNBDYFN-UHFFFAOYSA-N	91.1	HMDB0251245	C14689	Organic oxygen compounds	Organooxygen compounds	Ethers					2.60886e+06	2.53045e+06	2.54862e+06	2.73934e+06	2.58187e+06	2.6716e+06	2.66013e+06	2.62814e+06	2.78297e+06	2.77054e+06	2.79806e+06	2.79524e+06	0.004526	106.063
MP7023	4.922	223.063	3-(2-methylpropyl)-5-(propan-2-yl)-1,2,4-trithiolane	[M+H]+	C9H18S3	DPWFUUNELWJEHQ-UHFFFAOYSA-N	91.1			Organoheterocyclic compounds	Trithiolanes						1.88282e+07	1.79289e+07	1.92337e+07	1.57197e+07	1.62032e+07	1.50964e+07	1.71034e+07	1.72047e+07	1.53294e+07	1.54602e+07	1.54599e+07	1.5402e+07	0.0040234	222.057
MP5605	0.768	192.138	rupestine L	[M+H]+	C12H17NO	MMUVMQBKPYDMKS-SCZZXKLOSA-N	91			Organoheterocyclic compounds	Pyridines and derivatives	Methylpyridines					8.57474e+06	7.52147e+06	5.18337e+06	7.70399e+06	3.84874e+06	1.03838e+07	6.62656e+06	5.72924e+06	8.24443e+06	7.28831e+06	7.88316e+06	8.21923e+06	0.0562956	191.131
MP6850	3.217	219.122	D-Seryl-L-leucine	[M+H]+	C9H18N2O4		90.9										502504	109714	465362	119025	662134	351009	468492	245292	426742	390263	395199	455237	0.0725908	218.127
MP2326	0.626	116.107	4-aminomethyltetrahydropyran	[M+NH4]+	C6H13NO	IPBPLHNLRKRLPJ-UHFFFAOYSA-N	90.9			Organoheterocyclic compounds	Oxanes						485352	675757	344211	316904	680437	426689	1.07315e+06	342905	466297	462230	471602	489623	0.0255737	115.1
MP301	0.746	74.0599	N,N-dimethylformamide	[M+H]+	C3H7NO	ZMXDDKWLCZADIW-UHFFFAOYSA-N	90.8	HMDB0001888	C03134	Organic acids and derivatives	Carboxylic acids and derivatives	Carboxylic acid derivatives					5.83896e+06	6.43783e+06	5.72145e+06	1.17622e+07	1.36245e+07	1.68331e+07	1.03982e+07	1.60601e+07	9.399e+06	1.19538e+07	1.20212e+07	1.12933e+07	0.109562	73.0528
MP10530	4.729	301.215	ent-Kauradienoic acid	[M+H]+	C20H28O2	CZTZKVUEUYRGFD-MHHCCDILSA-N	90.8										3.591e+07	5.40213e+06	1.65912e+07	5.58719e+06	7.30975e+06	2.20301e+06	1.60147e+06	5.62618e+06	1.04249e+07	1.04027e+07	1.04032e+07	1.08356e+07	0.0202446	300.209
MP10709	5.456	306.242	Valethamate	[M+NH4]+	C19H32NO2		90.7										2.08954e+06	3.06874e+06	4.3637e+06	2.42093e+06	8.05752e+06	4.17405e+06	3.84138e+06	3.43931e+06	3.93237e+06	3.83336e+06	3.80734e+06	3.8078e+06	0.0154371	306.243
MP3211	4.684	139.111	Isophorone	[M+H]+	C9H14O	HJOVHMDZYOCNQW-UHFFFAOYSA-N	90.7	HMDB0031195	C14743	Organic oxygen compounds	Organooxygen compounds	Carbonyl compounds					1.17379e+06	1.25633e+06	1.37691e+06	1.28535e+06	1.52564e+06	1.3099e+06	1.46478e+06	1.42912e+06	1.29941e+06	1.29933e+06	1.29944e+06	1.34303e+06	0.0166528	138.104
MP3385	3.737	143.118	1-Cyclohexyl-3-(1,2,3,4-tetrahydro-1-naphthalenyl)urea	[M+NH4]+	C17H24N2O		90.6										688876	1.11041e+06	1.24189e+06	1.09496e+06	1.36018e+06	1.08315e+06	748681	676516	1.00404e+06	991063	1.00251e+06	996751	0.00592667	272.189
MP4289	4.64	163.039	4-Hydroxycoumarins	[M+H]+	C9H6O3	VXIXUWQIVKSKSA-UHFFFAOYSA-N	90.4			Phenylpropanoids and polyketides	Coumarins and derivatives	Hydroxycoumarins					7.39404e+06	7.27065e+06	6.55287e+06	7.27189e+06	7.47369e+06	7.33588e+06	7.19933e+06	7.33834e+06	7.98765e+06	7.93962e+06	7.83167e+06	7.98763e+06	0.0092673	162.032
MP3163	0.631	138.055	TRIGONELLINE	[M+Na]+		WWNNZCOKKKDOPX-UHFFFAOYSA-N	90.4	HMDB0000875	C01004	Alkaloids and derivatives			Alkaloids	Alkaloids derived from nicotinic acid	Pyridine alkaloids		719711	879838	284244	1.1225e+06	85833.6	386061	1.01006e+06	58887.4	709816	708519	696593	668724	0.0274141
MP2843	2.004	130.086	(S)-(-)-pipecolic acid	[M+H]+	C6H11NO2	HXEACLLIILLPRG-YFKPBYRVSA-N	90.4	HMDB0000716	C00408	Organic acids and derivatives	Carboxylic acids and derivatives	Amino acids, peptides, and analogues	Alkaloids	Alkaloids derived from lysine	Piperidine alkaloids		625471	1.05128e+06	333241	1.33046e+06	372243	1.0229e+06	319074	434785	433812	351794	363010	429887	0.10961	129.079
MP18318	5.383	510.215	Hygrocin D	[M+H]+	C28H31NO8	NAKWTVLAAKACFD-CYYALUPPSA-N	90.4			Phenylpropanoids and polyketides	Macrolactams						606245	83549	44144.5	17230.2	221377	1.36699e+06	1.82091e+06	1.31882e+06	29306.2	366392	368582	330958	0.598634	509.205
MP2581	0.818	123.055	Niacinamide	[M+H]+	C6H6N2O	DFPAKSUCGFBDDF-UHFFFAOYSA-N	90.4	HMDB0001406	C00153	Organoheterocyclic compounds	Pyridines and derivatives	Pyridinecarboxylic acids and derivatives	Vitamins and cofactors	Vitamins	Water-soluble vitamins		1.70069e+07	1.40278e+07	9.41343e+06	7.36929e+06	1.63412e+07	1.35818e+07	7.56435e+06	2.17049e+07	1.21553e+07	1.30893e+07	1.21549e+07	1.21521e+07	0.0377449	122.048
MP6434	4.752	210.185	3-methyl-13-azatricyclo[7.3.1.0,]tridecan-13-one	[M+H]+	C13H23NO		90.3										2.29805e+06	2.01947e+06	1.97339e+06	2.42457e+06	2.25528e+06	2.43427e+06	2.65464e+06	4.05398e+06	2.52176e+06	2.58298e+06	2.48091e+06	2.49404e+06	0.0179992	209.178
MP2623	0.782	124.039	NICOTINATE	[M+ACN+H]+		PVNIIMVLHYAWGP-UHFFFAOYSA-N	90.3	HMDB0001488	C00253	Organoheterocyclic compounds	Pyridines and derivatives	Pyridinecarboxylic acids and derivatives	Vitamins and cofactors	Vitamins	Water-soluble vitamins		1.2324e+07	9.0656e+06	1.08681e+07	7.35776e+06	3.45738e+06	3.66452e+06	159546	2.26135e+06	6.20232e+06	6.20268e+06	6.16363e+06	6.08964e+06	0.00863127
MP12002	5.951	338.266	Laingolide A	[M+H]+	C20H35NO3	WJVLPAKNVBCNQF-LCYFTJDESA-N	90.2										2.11177e+06	1.52258e+06	1.3821e+06	1.90008e+06	2.69966e+06	6.4346e+06	3.75618e+06	4.32521e+06	2.85214e+06	2.85247e+06	2.73968e+06	2.78784e+06	0.0195051	337.262
MP6073	0.94	202.18	1-(2-Hydroxyethyl)-2,2,6,6-tetramethyl-4-piperidinol	[M+NH4]+	C11H23NO2	STEYNUVPFMIUOY-UHFFFAOYSA-N	90.2			Organoheterocyclic compounds	Piperidines						1.55674e+08	1.89672e+08	2.04539e+08	2.40648e+08	2.14435e+08	2.68935e+08	2.03233e+08	3.27011e+08	2.26122e+08	2.27645e+08	2.22004e+08	2.25142e+08	0.0105814	201.173
MP8664	4.626	258.242	(2s)-1-[(2s,6s)-6-[(2s)-2-hydroxybutyl]piperidin-2-yl]hexan-2-ol	[M+H]+	C15H31NO2	RXJHXBORQMLXBV-AJNGGQMLSA-N	90.2			Organoheterocyclic compounds	Piperidines						1.04683e+08	1.75679e+08	9.34058e+07	1.17699e+08	2.22599e+08	2.09285e+08	1.81051e+07	3.23926e+07	1.21627e+08	1.2233e+08	1.18158e+08	1.20882e+08	0.01512	257.235
MP7227	5.269	227.106	Solstitialin A 13-acetate	[M+H]+	C17H22O6	XIVYFPUTCCJWCJ-YYZRPDGENA-N	90.1										1.02992e+08	1.25257e+08	1.33167e+08	1.24862e+08	484578	125082	425197	63187.4	6.25373e+07	6.22898e+07	6.21804e+07	6.32223e+07	0.00747635	322.142
MP6122	4.281	203.062	Diphenylphosphine oxide	[M+H]+	C12H11OP	ASUOLLHGALPRFK-UHFFFAOYSA-N	90.1			Benzenoids	Benzene and substituted derivatives	Phenylphosphines and derivatives					8108.07	293256	8.65117e+06	418076	8.68868e+06	8.78386e+06	1.47009e+06	4.6984e+06	1.95618e+06	1.95662e+06	1.94745e+06	1.95127e+06	0.00223014	202.055
MP622	0.708	79.021	Dimethyl Sulfoxide	[M+H]+	C2H6OS	IAZDPXIOMUYVGZ-UHFFFAOYSA-N	90	HMDB0002151	C11143	Organosulfur compounds	Sulfoxides						4.32377e+06	2.86288e+06	2.56863e+06	4.1984e+06	4.23516e+06	2.61091e+06	3.00129e+06	3.56247e+06	3.19946e+06	3.19543e+06	3.54503e+06	3.31054e+06	0.0494684	78.0139
MP8025	4.721	244.226	N-lauroylethanolamine	[M+H]+	C14H29NO2	QZXSMBBFBXPQHI-UHFFFAOYSA-N	89.9			Organic acids and derivatives	Carboximidic acids and derivatives	Carboximidic acids					2.82848e+06	5.7047e+06	2.61232e+06	4.47619e+06	8.41722e+06	1.19538e+07	4.69967e+06	7.95301e+06	6.58422e+06	6.21379e+06	6.28614e+06	6.0584e+06	0.0350908	243.22
MP2989	0.927	134.081	3-hydroxy-l-valine	[M+H]+	C5H11NO3	LDRFQSZFVGJGGP-GSVOUGTGSA-N	89.9			Organic acids and derivatives	Carboxylic acids and derivatives	Amino acids, peptides, and analogues					1.96921e+06	5.05602e+06	4.82919e+06	3.03251e+06	1.56663e+07	3.69695e+06	1.50103e+06	1.06196e+06	4.20331e+06	4.2111e+06	4.20589e+06	4.22829e+06	0.00266854	133.074
MP16591	6.85	464.357	PEG Diethylhexanoate n4	[M+ACN+H]+	C24H46O7	GYHPTPQZVBYHLC-UHFFFAOYSA-N	89.8			Lipids and lipid-like molecules	Fatty Acyls	Fatty acid esters					3.23245e+07	2.48484e+07	2.93389e+07	2.76308e+07	3.27539e+07	3.71005e+07	3.09931e+07	3.26326e+07	3.38357e+07	3.34024e+07	3.39588e+07	3.22508e+07	0.0233267	446.324
MP2988	0.643	134.081	Methyl O-(2-methyl-2-propanyl)-L-threoninate	[M+CH3OH+H]+	C9H19NO3		89.8										1.26351e+06	2.97873e+06	2.28851e+06	6.29876e+06	6.58479e+06	597100	161742	158342	2.60657e+06	2.66378e+06	2.6063e+06	2.60651e+06	0.0109358	189.136
MP7588	5.812	235.169	L-Valine	[M+ACN+H]+		KZSNJWFQEVHDMF-BYPYZUCNSA-N	89.8	HMDB0000883	C00183	Organic acids and derivatives	Carboxylic acids and derivatives	Amino acids, peptides, and analogues	Peptides	Amino acids	Common amino acids		1.27207e+07	1.46305e+07	1.42196e+07	1.55546e+07	1.50235e+07	1.78569e+07	1.76615e+07	1.9064e+07	1.58905e+07	1.58925e+07	1.60145e+07	1.62316e+07	0.0100202
MP4377	0.972	165.054	p-coumaric acid	[M+H]+	C9H8O3	NGSWKAQJJWESNS-ZZXKWVIFSA-N	89.7	HMDB0002035	C00811	Phenylpropanoids and polyketides	Cinnamic acids and derivatives	Hydroxycinnamic acids and derivatives	Phenylpropanoids	Monolignols	Paracoumaryl alcohol derivatives		93818.2	546081	464508	219823	284669	839097	220001	164182	384594	377150	384961	395582	0.0196638	164.047
MP5698	0.727	194.117	2-Methoxymethcathinone	[M+H]+	C11H15NO2	JKVDLNRJQFVERN-UHFFFAOYSA-N	89.7			Organic oxygen compounds	Organooxygen compounds	Carbonyl compounds					1.39904e+07	1.55881e+07	1.25286e+07	1.41159e+07	1.3588e+07	2.0745e+07	1.38964e+07	1.59943e+07	1.45584e+07	1.46623e+07	1.45573e+07	1.49776e+07	0.013524	193.11
MP3066	0.679	136.061	Adenine	[M+H]+	C5H5N5	GFFGJBXGBJISGV-UHFFFAOYSA-N	89.7	HMDB0000034	C00147	Organoheterocyclic compounds	Imidazopyrimidines	Purines and purine derivatives	Nucleic acids	Bases	Purines		546942	1.29685e+06	1.14126e+06	983460	1.06455e+06	773436	835336	749706	894979	910431	886373	853291	0.0272298	135.054
MP8963	3.485	265.121	dehydrojuncuenin B	[M+H]+	C18H16O2	FEOBWEMWBQNAEA-UHFFFAOYSA-N	89.7			Benzenoids	Phenanthrenes and derivatives	Phenanthrols					706121	2.18524e+06	646389	1.94367e+06	2.27458e+06	1.95085e+06	253416	575171	1.30328e+06	1.41545e+06	1.38729e+06	1.34382e+06	0.0361414	264.115
MP7426	3.158	231.12	4-Methoxycephalospolide G	[M+H]+	C11H18O5	PMWWGXUFWVBHBI-RGOKHQFPSA-N	89.7			Organic oxygen compounds	Organooxygen compounds	Alcohols and polyols					1.10354e+07	1.23298e+07	1.12722e+07	1.20803e+07	8.58572e+06	8.88513e+06	8.85856e+06	9.77553e+06	7.21944e+06	7.3887e+06	7.27794e+06	7.30932e+06	0.00966346	230.115
MP1370	0.668	93.0543	Glycerol	[M+H]+	C3H8O3	PEDCQBHIVMGVHV-UHFFFAOYSA-N	89.6	HMDB0000131	C00116	Organic oxygen compounds	Organooxygen compounds	Carbohydrates and carbohydrate conjugates	Carbohydrates	Monosaccharides	Sugar alcohols		1.32199e+06	1.44124e+06	1.24975e+06	1.52716e+06	1.49041e+06	1.38915e+06	1.19595e+06	1.52875e+06	1.43316e+06	1.47231e+06	1.4773e+06	1.45812e+06	0.0135501	92.0473
MP5332	4.498	186.221	Dodecylamine	[M+H]+	C12H27N	JRBPAEWTRLWTQC-UHFFFAOYSA-N	89.5	HMDB0251571		Organic nitrogen compounds	Organonitrogen compounds	Amines					2.74969e+06	2.4024e+06	2.79921e+06	3.63257e+06	2.39154e+06	1.52355e+07	1.14578e+07	1.24871e+07	6.15931e+06	6.15886e+06	6.08088e+06	6.08151e+06	0.00734764	185.214
MP7382	5.912	230.247	Lauryldimethylamine oxide	[M+ACN+H]+	C14H31NO	SYELZBGXAIXKHU-UHFFFAOYSA-N	89.5			Organic nitrogen compounds	Organonitrogen compounds	Aminoxides					7.86392e+06	6.74509e+06	6.49565e+06	1.11848e+07	1.42812e+07	2.83225e+07	9.78682e+06	1.51453e+07	1.14933e+07	1.2772e+07	1.16581e+07	1.14193e+07	0.0534087	229.241
MP10990	4.753	313.32	Myristamidopropyl dimethylamine	[2M+Na]+	C19H40N2O	IFYDWYVPVAMGRO-UHFFFAOYSA-N	89.4			Lipids and lipid-like molecules	Fatty Acyls	Fatty amides					1.28209e+06	172082	137563	576606	151750	5.03517e+07	4.1497e+07	5.92519e+07	1.72974e+07	1.67409e+07	1.68849e+07	1.67432e+07	0.0155265	312.314
MP3613	0.659	148.097	(2S)-2-Amino-3-hydroxy-4-methylpentanoic acid	[2M+NH4]+	C6H13NO3	ZAYJDMWJYCTABM-ROLXFIACSA-N	89.3			Organic acids and derivatives	Carboxylic acids and derivatives	Amino acids, peptides, and analogues					537293	913172	640297	795564	1.24333e+06	727740	245359	345975	655596	655608	655615	641177	0.0110649	147.09
MP11557	4.934	327.141	(3R,4R)-4,8-dihydroxy-3-((R)-2-hydroxypentyl)-6,7-dimethoxyisochroman-1-one	[M+H]+	C16H22O7	UNKFONNXVNFOSH-HWPZZCPQSA-N	89.3			Benzenoids	Benzene and substituted derivatives	Benzoic acids and derivatives					7.64231e+07	7.58649e+07	7.13829e+07	7.32871e+07	7.87217e+07	4.51556e+07	6.12303e+07	5.20375e+07	8.72396e+07	8.37475e+07	7.91897e+07	7.95423e+07	0.046305	326.137
MP6669	3.522	215.125	Pestalotin	[M+H]+	C11H18O4	YFIMUDXPJZVJJO-UWVGGRQHSA-N	89.3			Organoheterocyclic compounds	Pyrans	Pyranones and derivatives					2.51999e+07	2.2352e+07	3.91414e+07	4.59862e+07	1.16758e+07	1.45543e+07	1.54183e+07	1.13317e+07	2.51611e+07	2.54588e+07	2.54584e+07	2.53927e+07	0.00556698	214.121
MP2147	4.942	112.075	8-Quinolinyl 1-piperidinecarboxylate	[M+H-H2O]+	C15H16N2O2		89.3										2.28182e+07	1.95291e+07	8.75645e+07	2.08045e+07	1.71788e+08	1.15118e+08	5.44556e+07	7.96961e+07	7.6562e+07	7.65681e+07	7.47069e+07	7.59186e+07	0.0115357	256.121
MP14021	3.423	393.208	5-Fluoro-3,5-AB-PFUPPYCA	[M+Na]+	C20H26F2N4O2	JPKXVUNTSWGYKJ-SFHVURJKSA-N	89.2										4.85037e+06	8.60656e+06	6.29254e+06	5.10974e+06	7.97849e+06	9.52446e+06	4.04817e+06	6.57075e+06	6.81814e+06	6.88724e+06	6.80035e+06	6.89328e+06	0.0069198	392.202
MP9606	6.031	279.158	Diisobutylphthalate	[M+ACN+H]+	C16H22O4	MGWAVDBGNNKXQV-UHFFFAOYSA-N	89.1	HMDB0013835	C15205	Benzenoids	Benzene and substituted derivatives	Benzoic acids and derivatives					1.9969e+08	2.20399e+08	2.04406e+08	2.07391e+08	2.11266e+08	2.15261e+08	2.15104e+08	2.40422e+08	2.16774e+08	2.16763e+08	2.18087e+08	2.20309e+08	0.00766433	278.152
MP7818	5.91	240.232	(S)-7-((3R,5S,7Ar)-5-Methyl-Hexahydro-Pyrrolizin-3-Yl)-Heptan-2-Ol	[M+H]+	C15H29NO	MZVMQPFTTQKLEJ-BYNSBNAKSA-N	89.1			Organoheterocyclic compounds	Pyrrolizidines						4.3986e+06	3.35656e+06	4.1006e+06	6.1178e+06	8.7821e+06	1.46509e+07	8.25031e+06	7.45008e+06	7.59134e+06	7.59219e+06	6.8824e+06	7.5925e+06	0.0478524	239.225
MP8031	4.528	244.263	Laurixamine	[M+H]+	C15H33NO	ZRJOUVOXPWNFOF-UHFFFAOYSA-N	89.1			Organic oxygen compounds	Organooxygen compounds	Ethers					2.30032e+07	2.06009e+07	2.38221e+07	2.11083e+07	2.34528e+07	2.47327e+07	2.36247e+07	3.43349e+07	2.49789e+07	2.38582e+07	2.39331e+07	2.38574e+07	0.0227334	243.256
MP9855	4.194	285.094	tert-butyl 4-(chloroacetyl)piperazine-1-carboxylate	[M+Na]+	C11H19ClN2O3	PUGUQINMNYINPK-UHFFFAOYSA-N	88.9										1.73877e+06	3.8532e+06	6.77726e+06	4.98273e+06	5.47215e+06	4.10909e+06	2.65028e+06	2.27923e+06	5.84355e+06	5.71618e+06	5.70945e+06	5.78691e+06	0.0110254	262.108
MP3248	5.116	140.107	9-oxa-7-azatricyclo[4.3.1.0,]decane	[M+H]+	C8H13NO		88.9										219108	202948	504023	292283	929878	1.51984e+06	1.021e+06	1.12595e+06	725445	758369	723460	735964	0.0217573	139.1
MP13818	4.467	387.234	(1r,2s,3r,4r,6s,8s,9r,10r,13r,14r,16r)-5,5,9,14-tetramethyltetracyclo[11.2.1.0,.0,]hexadecane-2,3,4,6,9,14,16-heptol	[M+H]+	C20H34O7		88.9										1.59332e+07	4.09379e+07	5.64765e+07	2.79281e+07	3.43382e+06	2.60519e+06	2.71397e+06	3.37892e+06	2.11447e+07	2.14535e+07	2.08203e+07	2.12968e+07	0.0127598	386.23
MP3247	0.663	140.082	Toxopyrimidine	[M+H-H2O]+	C6H9N3O	VUTBELPREDJDDH-UHFFFAOYSA-N	88.8	HMDB0247327	C01279	Organoheterocyclic compounds	Diazines	Pyrimidines and pyrimidine derivatives					269322	672461	206297	432872	566528	826231	802758	475419	528137	512992	512972	512982	0.0146629	139.075
MP366	0.668	75.0439	Propionic Acid	[M+H]+	C3H6O2	XBDQKXXYIPTUBI-UHFFFAOYSA-N	88.8	HMDB0000237	C00163	Organic acids and derivatives	Carboxylic acids and derivatives	Carboxylic acids	Organic acids	Carboxylic acids	Monocarboxylic acids		1.27365e+06	1.42313e+06	1.00845e+06	1.10247e+06	1.21444e+06	1.36338e+06	1.01611e+06	1.2032e+06	1.18641e+06	1.15535e+06	1.17821e+06	1.15462e+06	0.0138011	74.0368
MP6722	4.337	216.195	CUDA	[M+H]+	C19H36N2O3	HPTJABJPZMULFH-UHFFFAOYSA-N	88.8			Lipids and lipid-like molecules	Fatty Acyls	Fatty acids and conjugates					2.41998e+06	2.73362e+06	3.31094e+06	2.47499e+07	2.60649e+06	4.49978e+06	3.07944e+06	1.10574e+07	7.14988e+06	7.05931e+06	7.10805e+06	7.14922e+06	0.0060311	340.273
MP7467	3.426	232.169	1-(2,3-Dihydro-1H-inden-5-yl)-2-(ethylamino)-1-butanone	[M+H-H2O]+	C15H21NO		88.8										2.45824e+06	2.39165e+06	2.41704e+06	2.49805e+06	2.49841e+06	2.50474e+06	2.54265e+06	2.48704e+06	2.50517e+06	2.48443e+06	2.45779e+06	2.43735e+06	0.0120383	231.162
MP11174	5.163	317.21	Clavirolide I	[M+H]+	C20H28O3	XCYXHJGOKOCTHQ-HPUSYDDDSA-N	88.7										2.29837e+07	1.26279e+07	2.51014e+07	1.21231e+07	1.24793e+07	3.6997e+06	3.60718e+06	8.31082e+06	1.22356e+07	1.22363e+07	1.23195e+07	1.25554e+07	0.0122407	316.204
MP12746	5.101	357.203	Galbulin	[M+H]+	C22H28O4	WYBOVISLCPAJFV-UHFFFAOYSA-N	88.7			Lignans, neolignans and related compounds	Aryltetralin lignans						1.2801e+07	5.21011e+06	5.0476e+06	3.93513e+06	5.91786e+06	2.4404e+06	3.42034e+06	4.69212e+06	5.99769e+06	5.89833e+06	5.65361e+06	5.73293e+06	0.0267947	356.199
MP3800	0.939	152.107	Hydroxyamphetamine	[M+NH4]+	C9H13NO	GIKNHHRFLCDOEU-SSDOTTSWSA-N	88.7	HMDB0060765		Benzenoids	Benzene and substituted derivatives	Phenethylamines					121746	1.13107e+06	5.02084e+06	517985	6.52582e+06	531269	340601	399907	1.75382e+06	1.84749e+06	1.72725e+06	1.72753e+06	0.0323243	151.1
MP10294	4.188	296.182	Serratezomine B	[M+H]+	C16H25NO4	ASIURCHCIBWDEU-LPNOPGGHSA-N	88.6			Organoheterocyclic compounds	Azaspirodecane derivatives						279352	812060	485538	224135	1.35133e+06	1.84113e+06	468044	911961	657972	665666	648057	637428	0.0187763	295.178
MP6228	3.057	205.097	L-Tryptophan	[M+H]+	C11H12N2O2	QIVBCDIJIAJPQS-UHFFFAOYSA-N	88.6	HMDB0000929	C00078	Organoheterocyclic compounds	Indoles and derivatives	Indolyl carboxylic acids and derivatives	Peptides	Amino acids	Common amino acids		1.86486e+06	6.1233e+06	3.83255e+06	1.63731e+06	1.88763e+06	8.38572e+06	1.56552e+06	1.06707e+06	3.27406e+06	3.30198e+06	3.21893e+06	3.26944e+06	0.0105863	204.09
MP3793	4.258	152.016	3H-1,3-Benzothiazol-2-One	[M+H]+	C7H5NOS	YEDUAINPPJYDJZ-UHFFFAOYSA-N	88.6			Organoheterocyclic compounds	Benzothiazoles						1.19142e+06	4.33856e+06	3.39139e+06	5.15142e+06	8.05328e+06	5.36633e+06	6.22665e+06	9.72543e+06	5.38105e+06	5.28819e+06	5.31345e+06	5.34989e+06	0.00764292	151.009
MP3890	3.097	154.041	1-Pyridin-3-ylthiourea	[M+NH4]+	C6H7N3S	CFOJQUGXHMGMOT-UHFFFAOYSA-N	88.5										3.94864e+07	3.72863e+07	3.95457e+07	3.9341e+07	4.00869e+07	3.95497e+07	3.87523e+07	3.89252e+07	3.99625e+07	4.00753e+07	3.86212e+07	3.94478e+07	0.0167622	153.036
MP3944	3.777	155.07	3-[(1E)-1-Propen-1-yl]pentanedioic acid	[M+H]+	C8H12O4		88.5										23746.9	1.31004e+06	3.58004e+06	919475	2.09706e+06	871747	1.36022e+06	1.73202e+06	1.45593e+06	1.44692e+06	1.46935e+06	1.43507e+06	0.00997252	172.074
MP10442	5.925	299.2	Norethynodrel	[M+H]+	C20H26O2	ICTXHFFSOAJUMG-SLHNCBLASA-N	88.5	HMDB0255736	C14249	Lipids and lipid-like molecules	Steroids and steroid derivatives	Oxosteroids					9.54922e+06	1.69021e+06	5.91149e+06	2.31101e+06	1.96024e+06	410883	631461	1.03311e+06	2.99683e+06	3.02637e+06	3.02631e+06	3.00481e+06	0.00500632	298.193
MP158	0.998	72.0443	2-Azetidinone	[M+H]+	C3H5NO	MNFORVFSTILPAW-UHFFFAOYSA-N	88.5	HMDB0248795		Organic acids and derivatives	Carboximidic acids and derivatives	Carboximidic acids					366144	1.53241e+06	678572	608814	1.4314e+06	940177	556763	1.0731e+06	912078	911793	912383	978194	0.0355967	71.0371
MP7765	4.008	239.127	(5R,6R)-6-ethyl-5-hydroxy-3-(methoxymethyl)-5,6,7,8-tetrahydro-4H-chromen-4-one	[M+H]+	C13H18O4	WQNHLSNFCSLZQY-PRHODGIISA-N	88.5			Organoheterocyclic compounds	Pyrans	Pyranones and derivatives					1.49025e+06	2.87842e+06	8.1713e+06	2.29294e+06	1.75085e+06	844795	1.48832e+06	962759	2.55482e+06	2.54286e+06	2.53948e+06	2.54121e+06	0.0027332	238.121
MP5864	3.355	198.135	2-Hydroxyatrazine	[M+H]+	C8H15N5O	NFMIMWNQWAWNDW-UHFFFAOYSA-N	88.4	HMDB0062766	C06552	Organoheterocyclic compounds	Triazines	1,3,5-triazines					2.2928e+06	3.39904e+06	3.19187e+06	3.57205e+06	3.5408e+06	3.33647e+06	3.08566e+06	3.26946e+06	3.14495e+06	3.19217e+06	3.16483e+06	3.13169e+06	0.00832947	197.128
MP6347	4.053	208.096	Streptazolin	[M+H]+	C11H13NO3	OJIUACOQFBQCDF-PQHAYRQSNA-N	88.3										677425	2.56862e+06	5.55011e+06	806036	1.34634e+07	8.64924e+06	3.59533e+06	5.831e+06	5.33849e+06	5.3108e+06	5.20323e+06	5.3388e+06	0.012159	207.09
MP6082	4.177	202.216	N,N-Dimethyldecylamine N-oxide	[M+ACN+H]+	C12H27NO	ZRKZFNZPJKEWPC-UHFFFAOYSA-N	88.3			Organic nitrogen compounds	Organonitrogen compounds	Aminoxides					902662	1.38184e+06	1.35824e+06	1.45577e+06	3.62989e+06	5.39788e+06	2.79019e+06	3.96177e+06	2.5766e+06	2.47971e+06	2.50027e+06	2.44769e+06	0.0219137	201.209
MP5144	0.971	182.081	L-Tyrosine	[M+NH4]+	C9H11NO3	OUYCCCASQSFEME-QMMMGPOBSA-N	88.3	HMDB0000158	C00082	Organic acids and derivatives	Carboxylic acids and derivatives	Amino acids, peptides, and analogues	Peptides	Amino acids	Common amino acids		1.5846e+06	8.13914e+06	6.3064e+06	3.13064e+06	4.33657e+06	1.22343e+07	3.76546e+06	2.88527e+06	5.23638e+06	5.23633e+06	5.25005e+06	5.2901e+06	0.0048398	181.074
MP5188	4.178	183.078	TEP	[M+NH4]+	C6H15O4P	DQWPFSLDHJDLRL-UHFFFAOYSA-N	88.3	HMDB0259191		Organic acids and derivatives	Organic phosphoric acids and derivatives	Phosphate esters					2.53628e+06	2.90841e+06	3.07493e+06	3.68102e+06	2.85287e+06	3.63349e+06	3.04818e+06	3.69799e+06	3.25684e+06	3.27419e+06	3.2742e+06	3.19321e+06	0.0118411	182.071
MP7028	4.79	223.096	Monoisobutyl phthalic acid	[M+H]+	C12H14O4	RZJSUWQGFCHNFS-UHFFFAOYSA-N	88.3	HMDB0002056		Benzenoids	Benzene and substituted derivatives	Benzoic acids and derivatives					8.59028e+06	9.13554e+06	7.78783e+06	8.62124e+06	7.97367e+06	8.96356e+06	8.69964e+06	9.03835e+06	8.85468e+06	9.00985e+06	9.0733e+06	9.07205e+06	0.0114284	222.089
MP4587	5.459	170.096	Diphenylamine	[M+H]+	C12H11N	DMBHHRLKUKUOEG-UHFFFAOYSA-N	88.2	HMDB0032562	C11016	Benzenoids	Benzene and substituted derivatives	Aniline and substituted anilines					1.4114e+06	3.26586e+06	3.0337e+06	3.63285e+06	1.65509e+06	1.70083e+06	1.63884e+06	1.59291e+06	2.33847e+06	2.33907e+06	2.30704e+06	2.16629e+06	0.0359841	169.089
MP3748	1.22	151.096	Triethylene glycol	[M+CH3OH+H]+	C6H14O4	ZIBGPFATKBEMQZ-UHFFFAOYSA-N	88.2	HMDB0259193		Organic oxygen compounds	Organooxygen compounds	Ethers					5.2996e+06	5.8185e+06	6.57309e+06	6.38337e+06	5.58301e+06	4.10897e+06	3.8317e+06	3.96425e+06	4.36059e+06	4.33795e+06	4.37031e+06	4.40239e+06	0.00612235	150.089
MP1672	0.13	100.075	3-Methylglutarimide	[M+H]+	C6H9NO2	OTQNZVVDFWNHDO-UHFFFAOYSA-N	88.2			Organoheterocyclic compounds	Piperidines	Piperidinones					5.37202e+07	1.95569e+07	2.77578e+07	2.37731e+07	2.33616e+07	4.9713e+07	1.75568e+07	2.67735e+07	2.96747e+07	3.29743e+07	2.87011e+07	2.86855e+07	0.0676578	127.063
MP2846	1.304	130.086	Fmoc-DL-pipecolic acid	[M+H]+	C21H21NO4	CKLAZLINARHOTG-UHFFFAOYSA-N	88.2			Benzenoids	Fluorenes						1.45618e+06	1.86614e+06	1.78889e+06	1.50729e+06	2.11835e+06	1.82372e+06	1.30042e+06	1.02024e+06	1.4809e+06	1.42589e+06	1.49998e+06	1.547e+06	0.0336623	351.147
MP7177	5.083	226.122	N-Benzyl-4-methylbenzamide	[M+H]+	C15H15NO	QIULRTIURUDCGH-UHFFFAOYSA-N	88.2			Benzenoids	Benzene and substituted derivatives	Benzoic acids and derivatives					7.21535e+06	9.22444e+06	1.23115e+07	8.96103e+06	1.30721e+07	6.67591e+06	7.43618e+06	7.08928e+06	9.13663e+06	9.07968e+06	8.93096e+06	9.13732e+06	0.0107248	225.115
MP10483	6.51	300.289	Palmitylethanolamide	[2M+NH4]+	C18H37NO2	HXYVTAGFYLMHSO-UHFFFAOYSA-N	88.2	HMDB0002100	C16512	Organic acids and derivatives	Carboximidic acids and derivatives	Carboximidic acids	Lipids	FA Fatty acyls	FA08 Fatty amides		2.10266e+07	1.45407e+07	2.45409e+07	1.75809e+07	2.59151e+07	4.65133e+07	4.83386e+07	5.55402e+07	2.98397e+07	2.93816e+07	2.93692e+07	3.02874e+07	0.0147165	299.282
MP9303	3.364	272.185	3-Hydroxy-N-[(3S)-2-oxotetrahydro-3-furanyl]decanamide	[M+H]+	C14H25NO4		88.1										2.10541e+07	1.86829e+07	1.44195e+07	1.49949e+07	1.65149e+07	1.7525e+07	1.76365e+07	1.65885e+07	1.29912e+07	1.29909e+07	1.29233e+07	1.28442e+07	0.00539796	271.178
MP3517	1.196	146.081	4-Acetamidobutyric acid	[M+H]+	C6H11NO3	UZTFMUBKZQVKLK-UHFFFAOYSA-N	88.1	HMDB0003681	C02946	Organic acids and derivatives	Carboxylic acids and derivatives	Amino acids, peptides, and analogues					366349	1.21936e+06	429953	398398	1.39429e+06	396142	318411	249065	514314	567970	571902	575368	0.0518038	145.074
MP2212	0.703	113.107	3-(4-Methyl-1-piperazinyl)propanehydrazide	[M+ACN+H]+	C8H18N4O		88.1										636217	267212	337519	2.04012e+06	159724	38106.6	233805	79849.5	459721	476434	451393	449396	0.0267975	186.148
MP9316	4.601	272.258	(2r)-1-[(2s,6r)-6-[(2s)-2-hydroxypentyl]-1-methylpiperidin-2-yl]pentan-2-ol	[M+H]+	C16H33NO2	BEHRYCYNRCQBOK-SYMSYNOKSA-N	88			Organoheterocyclic compounds	Piperidines						1.43322e+07	2.1061e+07	1.43409e+07	1.50866e+07	3.61281e+07	6.33798e+07	1.89813e+07	2.60023e+07	2.58943e+07	2.54169e+07	2.54011e+07	2.53986e+07	0.00957743	271.251
MP9003	4.468	266.172	Lentinulactam	[M+H]+	C15H23NO3	SURDHOSJKFGQIJ-GLRJYAJPSA-N	88			Organoheterocyclic compounds	Pyridines and derivatives	Hydropyridines					2.0528e+06	1.82152e+06	1.78833e+06	2.04911e+07	2.54341e+06	2.9686e+06	1.30073e+06	1.41948e+07	6.75165e+06	6.24365e+06	6.23015e+06	6.41099e+06	0.0378716	265.168
MP8395	3.681	253.14	N-(2-Fluorophenyl)-3-(4-morpholinyl)propanamide	[M+CH3OH+H]+	C13H17FN2O2	XGWZQHFZNYNRIE-UHFFFAOYSA-N	88										305542	870335	286161	665360	718141	782802	588209	625070	676849	742892	679160	679792	0.0463103	252.127
MP4085	0.939	158.154	N-Methylpseudoconhydrine	[M+H]+	C9H19NO	MSYUGRASNIEUCW-IUCAKERBSA-N	88										4.48044e+06	6.23199e+06	7.8225e+06	8.35714e+06	7.41147e+06	9.80797e+06	6.22004e+06	8.32254e+06	7.82427e+06	7.95198e+06	7.77259e+06	7.773e+06	0.0108002	157.147
MP12748	5.226	357.203	Prostaglandin A2	[M+H]+	C20H30O4	MYHXHCUNDDAEOZ-BMZFSJBMSA-N	87.9	HMDB0002752	C05953	Lipids and lipid-like molecules	Fatty Acyls	Eicosanoids	Lipids	Eicosanoids	Prostaglandins		3.58233e+06	1.54766e+06	1.9349e+06	1.26387e+06	1.28487e+06	1.18416e+06	815723	1.07653e+06	1.56681e+06	1.62451e+06	1.51709e+06	1.51943e+06	0.0324501	334.214
MP8705	0.954	259.092	D-(+)-Pyroglutamic Acid	[M+NH4]+	C5H7NO3	ODHCTXKNWHHXJC-GSVOUGTGSA-N	87.9		C02237	Organic acids and derivatives	Carboxylic acids and derivatives	Amino acids, peptides, and analogues					2.01929e+06	910858	391303	647915	76772.6	266110	25780	39275	341937	330676	339482	341968	0.0158176	129.043
MP18714	3.583	520.331	PEG n11	[M+NH4]+	C22H46O12	PSVXZQVXSXSQRO-UHFFFAOYSA-N	87.8			Organic oxygen compounds	Organooxygen compounds	Ethers					1.90397e+07	2.55677e+07	2.39876e+07	1.72462e+07	2.26082e+07	1.77688e+07	9.53302e+06	1.48436e+07	1.86929e+07	1.86931e+07	1.86923e+07	1.81997e+07	0.0132772	502.299
MP6006	1.097	201.087	(3S,7R,8As)-7-Hydroxy-3-(Hydroxymethyl)Hexahydropyrrolo[1,2-A]Pyrazine-1,4-Dione	[M+H]+	C8H12N2O4	FUYZNZHRVJWTLT-SRQIZXRXSA-N	87.8			Organic acids and derivatives	Carboxylic acids and derivatives	Amino acids, peptides, and analogues					709903	1.12439e+06	1.48779e+06	701637	2.26336e+06	399839	246287	118533	797873	825355	797876	799998	0.0166696	200.08
MP2582	1.905	123.057	3-methylthymine	[M+H-H2O]+	C6H8N2O2	IIDONYMEGWHGRU-UHFFFAOYSA-N	87.8	HMDB0245938		Organoheterocyclic compounds	Diazines	Pyrimidines and pyrimidine derivatives					1.64886e+07	1.15127e+07	6.51372e+06	1.13645e+06	277598	302966	1.75525e+06	3.15499e+06	4.97202e+06	4.94662e+06	4.94516e+06	5.05405e+06	0.0102889	140.059
MP1480	0.685	96.0442	3-Hydroxypyridine	[M+H]+	C5H5NO	GRFNBEZIAWKNCO-UHFFFAOYSA-N	87.7			Organoheterocyclic compounds	Pyridines and derivatives	Hydroxypyridines					517164	815778	895233	842981	721441	1.03465e+06	634078	1.15044e+06	846502	870332	813871	814612	0.032641	95.0371
MP2150	4.68	112.075	N-(4-Bromophenyl)-4-piperidinecarboxamide	[M+H]+	C12H15BrN2O		87.7										2.33528e+06	1.78887e+06	2.44024e+06	2.09011e+06	3.70361e+06	4.31182e+06	1.9713e+06	2.95193e+06	2.90943e+06	2.84147e+06	2.81203e+06	2.81334e+06	0.0160479	282.037
MP9977	4.776	288.253	N,N-Bis(2-hydroxyethyl)dodecanamide	[M+NH4]+	C16H33NO3	AOMUHOFOVNGZAN-UHFFFAOYSA-N	87.7			Lipids and lipid-like molecules	Fatty Acyls	Fatty amides					1.2363e+07	1.29234e+07	8.59182e+06	1.34418e+07	1.83312e+07	4.53072e+07	1.91857e+07	3.34008e+07	2.13743e+07	2.11105e+07	2.10139e+07	2.10145e+07	0.00805414	287.246
MP12139	5.539	342.076	Propiconazole	[M+H]+	C15H17Cl2N3O2	STJLVHWMYQXCPB-SWLSCSKDSA-N	87.7	HMDB0256825	C11121	Benzenoids	Benzene and substituted derivatives	Halobenzenes					1.90471e+08	1.18064e+08	1.13952e+08	1.96212e+08	6.21715e+07	8.67354e+07	1.11614e+08	9.58586e+07	1.2178e+08	1.18254e+08	1.18258e+08	1.1826e+08	0.0147847	341.07
MP11158	3.465	317.138	Heptelidic acid chlorohydrin	[M+H]+	C15H21ClO5	BJGUEPXNQKBVBW-RTWAVKEYSA-N	87.7			Lipids and lipid-like molecules	Prenol lipids	Terpene lactones					414884	446519	196151	397980	284219	57558.7	1.39715e+06	1.0334e+06	337354	400132	399783	383726	0.0778519	316.108
MP6840	4.111	219.056	Hydantocidin	[M+H]+	C7H10N2O6	RFZZKBWDDKMWNM-WVQVIYPNSA-N	87.6										5.82761e+06	7.07944e+06	1.48761e+07	8.51995e+06	3.03736e+07	3.64558e+07	1.18374e+07	1.38935e+07	1.69148e+07	1.69148e+07	1.68658e+07	1.68231e+07	0.00261935	218.054
MP13099	4.38	367.268	Hexapropylene glycol	[M+ACN+H]+	C18H38O7	UDOJNGPPRYJMKR-UHFFFAOYSA-N	87.6			Organic oxygen compounds	Organooxygen compounds	Alcohols and polyols					8.45388e+07	1.23053e+08	1.49595e+08	1.22361e+08	1.29253e+07	2.80604e+07	1.84348e+07	1.39014e+07	7.0683e+07	7.05219e+07	7.03424e+07	7.06475e+07	0.0021817	366.262
MP11036	4.898	314.305	Heptadecanoyl Ethanolamide	[M+H]+	C19H39NO2	GCCFMSAXQJECNH-UHFFFAOYSA-N	87.5			Organic nitrogen compounds	Organonitrogen compounds	Amines					1.99314e+06	4.94086e+06	2.97663e+06	3.9121e+06	2.25824e+06	5.78078e+06	4.66382e+06	3.85647e+06	3.2819e+06	3.00916e+06	3.24192e+06	2.9412e+06	0.0540777	313.298
MP2763	0.513	128.019	2-Thiophenecarboxaldehyde Oxime	[M+H]+	C5H5NOS	GASLBPLHYRZLLT-GQCTYLIASA-N	87.5			Organoheterocyclic compounds	Heteroaromatic compounds						1.46776e+07	1.50288e+07	7.9861e+06	7.57558e+06	1.03617e+07	7.61521e+06	2.03633e+06	4.52073e+06	8.23033e+06	8.09504e+06	8.09448e+06	8.09473e+06	0.00833995	127.009
MP2626	7.176	124.087	(1R,2R)-2-(1H-imidazol-4-yl)cyclopropanamine	[M+H]+	C6H9N3		87.5										5.90773e+07	8.48169e+07	9.69962e+07	5.10148e+07	7.79408e+07	6.47352e+07	1.23581e+08	1.12089e+08	1.26215e+08	1.12098e+08	9.82693e+07	1.0462e+08	0.108984	123.08
MP11742	4.938	332.221	(1s,3s,5r,8r,9s,10s,11r,14s,17r,18r,19s)-5-methyl-12-methylidene-7-azahexacyclo[9.6.2.0,.0,.0,.0,]nonadecane-3,10,19-triol	[M+H]+	C20H29NO3		87.5										4.56669e+06	132655	129459	50896.4	362022	486950	519859	433532	844406	846599	818266	846985	0.0165797	331.215
MP9781	3.246	283.174	PEG n6	[M+H]+	C12H26O7	IIRDTKBZINWQAW-UHFFFAOYSA-N	87.5			Organic oxygen compounds	Organooxygen compounds	Ethers					8.78307e+06	1.32646e+07	9.72638e+06	9.41892e+06	1.21871e+07	1.35112e+07	5.96022e+06	7.4103e+06	9.92858e+06	9.92823e+06	9.92016e+06	9.74868e+06	0.00896359	282.168
MP4668	7.921	171.993	Armentomycin	[M+H]+	C4H7Cl2NO2	DGJTWBMINQYSMS-RUOZJJLTNA-N	87.5										9.64997e+06	1.79918e+07	8.87185e+06	1.62011e+07	8.69777e+06	2.58906e+07	1.94178e+07	7.15928e+06	8.60113e+06	1.02821e+07	1.02807e+07	1.0011e+07	0.0822175	170.985
MP6348	4	208.096	N-[1-(1,3-Benzodioxol-5-yl)-2-propanyl]formamide	[M+CH3OH+H]+	C11H13NO3		87.4										960002	9.36869e+06	3.90806e+06	4.26887e+06	7.52702e+06	6.45909e+06	1.99078e+06	9.83634e+06	7.24787e+06	7.24797e+06	7.22345e+06	7.22339e+06	0.00195517	207.09
MP8060	3.574	245.135	Stagonolide B	[M+H]+	C12H20O5	ACOJSDCJVLNWBV-GXJYKEMOSA-N	87.4			Organoheterocyclic compounds	Oxocins						1.60608e+06	2.21526e+06	2.08625e+06	2.28727e+06	1.61168e+06	721559	1.44075e+06	1.6426e+06	820018	1.119e+06	1.12014e+06	1.12064e+06	0.143506	244.131
MP6854	4.033	219.137	1,5-dimethyl-1-vinyl-4-hexenyl acetate	[M+Na]+	C12H20O2	UWKAYLJWKGQEPM-LBPRGKRZSA-N	87.4	HMDB0039522	C09863	Lipids and lipid-like molecules	Prenol lipids	Monoterpenoids	Lipids	PR Prenol lipids	PR01 Isoprenoids		1.97074e+06	1.80048e+06	2.11434e+06	1.94635e+06	1.99125e+06	1.98985e+06	2.22015e+06	1.86647e+06	2.13333e+06	2.13383e+06	2.15578e+06	2.23245e+06	0.021683	196.146
MP9600	4.861	279.093	Phenacyltriphenylphosphonium	[M+H]+	C26H22OP		87.4										6.89385e+06	6.353e+06	5.43021e+06	6.46654e+06	7.52287e+06	7.25786e+06	7.68027e+06	7.7545e+06	7.60417e+06	7.48647e+06	7.40123e+06	7.40265e+06	0.0128069	381.141
MP6992	5.632	222.148	exalamide	[M+H]+	C13H19NO2	CKSJXOVLXUMMFF-UHFFFAOYSA-N	87.4			Benzenoids	Phenol ethers						1.33338e+07	7.46314e+06	7.32423e+06	9.8294e+06	8.20264e+06	1.98684e+07	1.38446e+07	1.67044e+07	1.19767e+07	1.19753e+07	1.16155e+07	1.18827e+07	0.0143696	221.142
MP6390	3.273	209.138	3,6,9,12-tetraoxatridecan-1-ol	[M+H]+	C9H20O5	ZNYRFEPBTVGZDN-UHFFFAOYSA-N	87.4			Organic oxygen compounds	Organooxygen compounds	Ethers					1.11588e+06	1.3603e+06	1.49375e+06	1.34532e+06	837591	950913	945817	813479	800952	794057	807252	802032	0.00677427	208.131
MP10440	5.144	299.2	7-(2-hydroxypropan-2-yl)-1,4a-dimethyl-1,2,3,4,4a,9,10,10a-octahydrophenanthrene-1-carboxylic acid	[M+NH4]+	C20H28O3		87.4										2.97545e+07	4.1334e+06	1.03787e+07	5.78278e+06	9.8422e+06	2.4969e+06	1.46436e+06	7.30779e+06	8.83331e+06	8.90902e+06	8.89098e+06	8.90903e+06	0.00403734	316.204
MP7956	4.433	243.101	1-hydroxy--phenylcyclopentylacetic acid	[M+H]+	C13H16O3		87.3										1.30571e+07	1.20443e+07	1.51435e+07	1.95171e+07	6553.1	7333.65	8178.67	7.79984e+06	7.68303e+06	7.51951e+06	7.51963e+06	7.54808e+06	0.010326	220.11
MP5000	3.205	179.127	Triethyleneglycol dimethyl ether	[M+H]+	C8H18O4	YFNKIDBQEZZDLK-UHFFFAOYSA-N	87.3			Organic oxygen compounds	Organooxygen compounds	Ethers					2.57699e+06	3.33632e+06	3.80885e+06	3.2587e+06	693006	624203	763816	514593	1.24124e+06	1.24004e+06	1.47177e+06	1.30509e+06	0.0830254	178.121
MP8064	3.344	245.185	Leu-Leu	[M+H]+	C12H24N2O3	LCPYQJIKPJDLLB-UWVGGRQHSA-N	87.3	HMDB0028933	C11332	Organic acids and derivatives	Carboxylic acids and derivatives	Amino acids, peptides, and analogues					484801	2.48961e+06	2.64203e+06	1.81039e+06	1.37749e+06	1.51272e+06	1.39647e+06	991546	1.53022e+06	1.5156e+06	1.5714e+06	1.51543e+06	0.0172308	244.179
MP7767	3.085	239.148	RZ2670000	[M+H]+	C10H22O6		87.2										1.24144e+07	1.85011e+07	1.3229e+07	1.34307e+07	1.51381e+07	1.56519e+07	7.12273e+06	9.61132e+06	1.35324e+07	1.33392e+07	1.31857e+07	1.31864e+07	0.0123485	238.142
MP2321	1.231	116.07	5-methoxypyrrolidin-2-one	[M+H]+	C5H9NO2	VULIHENHKGDFAB-UHFFFAOYSA-N	87.2	HMDB0034208		Organoheterocyclic compounds	Pyrrolidines	Pyrrolidones					1.46731e+06	1.48508e+06	3.35861e+06	2.62566e+06	1.84097e+06	1.35208e+06	1.77072e+06	580091	1.7241e+06	1.7134e+06	1.19767e+06	1.71637e+06	0.163856	115.063
MP2207	0.621	113.071	Pyrazole-1-ethanol	[M+ACN+H]+	C5H8N2O	DXFBKDSQMUFYLD-UHFFFAOYSA-N	87.2			Organoheterocyclic compounds	Azoles	Pyrazoles					2.64746e+06	2.75806e+06	5.85511e+06	6.3535e+06	5.83616e+06	3.44274e+06	1.30028e+06	1.43749e+06	4.08423e+06	4.01473e+06	4.00767e+06	3.9764e+06	0.01131	112.064
MP9982	4.382	288.253	Lauroyl diethanolamide	[M+H]+	C16H33NO3	AOMUHOFOVNGZAN-UHFFFAOYSA-N	87.1	HMDB0032358		Lipids and lipid-like molecules	Fatty Acyls	Fatty amides					37022.3	2.00747e+07	1.50653e+07	1.61315e+06	2.78159e+07	8.86823e+07	153773	1.16711e+06	1.87886e+07	7.60284e+06	1.88389e+07	7.49445e+06	0.493438	287.246
MP5608	1.098	192.138	N-ETHYL-N-METHYLCATHINONE	[M+ACN+H]+	C12H17NO	LOQPFJRCXJZNQV-UHFFFAOYSA-N	87.1			Organic oxygen compounds	Organooxygen compounds	Carbonyl compounds					7.30432e+06	1.13657e+06	214153	6.18649e+06	5.64011e+06	7.08859e+06	4.59939e+06	4.66638e+06	5.56795e+06	4.63093e+06	5.60517e+06	4.93785e+06	0.0925705	191.131
MP4542	3.331	169.076	2-(4-Fluorophenyl)acetohydrazide	[M+ACN+H]+	C8H9FN2O	PFBNINAURUGQRR-UHFFFAOYSA-N	87.1										1.12035e+07	345051	193325	88245	362077	557062	493009	713387	1.67302e+06	1.71391e+06	1.66384e+06	1.68273e+06	0.0129315	168.07
MP6428	4.064	210.148	N-2-Ethylhexyl bicycloheptenedicarboximide	[M+ACN+H]+	C17H25NO2	WLLGXSLBOPFWQV-UHFFFAOYSA-N	87.1			Organoheterocyclic compounds	Isoindoles and derivatives	Isoindolines					2.23354e+06	1.94819e+06	2.11077e+06	2.32566e+06	3.02868e+06	3.60312e+06	1.82606e+06	3.27303e+06	2.55514e+06	2.51793e+06	2.54466e+06	2.53539e+06	0.00621967	275.189
MP11701	5.501	331.18	1-Benzyl-3-[(dimethylamino)methyl]-2-methylindeno[2,1-b]pyrrol-8(1H)-one	[M+H]+	C22H22N2O		87.1										6.96069e+06	8.25962e+06	7.31555e+06	5.73849e+06	1.41051e+07	8.59002e+06	6.24349e+06	9.26835e+06	8.32926e+06	8.29027e+06	8.27631e+06	8.32925e+06	0.00326813	330.173
MP2579	0.708	123.055	Isonicotinamide	[M+H]+	C6H6N2O	VFQXVTODMYMSMJ-UHFFFAOYSA-N	87	HMDB0253663	C02421	Organoheterocyclic compounds	Pyridines and derivatives	Pyridinecarboxylic acids and derivatives					3.84163e+06	2.86391e+06	1.56547e+06	1.50606e+06	2.98237e+06	3.94275e+06	1.68797e+06	4.78333e+06	2.88219e+06	2.8105e+06	2.82539e+06	2.81062e+06	0.0120292	122.048
MP17275	4.84	483.351	PPG n8	[M+H]+	C24H50O9	ZZEANNAZZVVPKU-UHFFFAOYSA-N	87			Organic oxygen compounds	Organooxygen compounds	Alcohols and polyols					4.90338e+07	7.53306e+07	9.07659e+07	6.45773e+07	8.30387e+06	8.68939e+06	1.16751e+07	1.19647e+07	4.20067e+07	4.21369e+07	4.202e+07	4.37669e+07	0.0202003	482.345
MP8397	4.368	253.143	5-[(1R,4R,6R)-1,4-dihydroxy-2,6-dimethylcyclohex-2-en-1-yl]-3-methylpenta-2,4-dienoic acid	[M+H]+	C14H20O4	JENHNTUYAQEPPI-BPNCWPANSA-N	87			Organoheterocyclic compounds	Dioxanes	1,2-dioxanes					1.35175e+06	1.82078e+06	1.70102e+06	1.13301e+06	2.50043e+06	2.78623e+06	2.28948e+06	2.24648e+06	2.2147e+06	2.21459e+06	2.13026e+06	2.20976e+06	0.0189029	252.136
MP7341	0.706	229.154	Prolylleucine	[M+CH3OH+H]+	C11H20N2O3	ZKQOUHVVXABNDG-IUCAKERBSA-N	86.9	HMDB0253028		Organic acids and derivatives	Carboxylic acids and derivatives	Amino acids, peptides, and analogues					778400	2.05139e+06	1.43889e+06	444656	1.01924e+06	1.10484e+06	1.94628e+06	242509	1.0519e+06	1.05194e+06	1.04734e+06	1.02342e+06	0.0130873	228.147
MP5870	4.897	198.185	N-Octyl-2-pyrrolidone	[M+H-H2O]+	C12H23NO	WPPOGHDFAVQKLN-UHFFFAOYSA-N	86.9			Organoheterocyclic compounds	Pyrrolidines	N-alkylpyrrolidines					1.35225e+07	1.28872e+07	1.32328e+07	1.31481e+07	1.42269e+07	1.49078e+07	1.32484e+07	1.41505e+07	1.37624e+07	1.37626e+07	1.37624e+07	1.39399e+07	0.00642581	197.178
MP17009	3.536	476.305	PEG n10	[M+NH4]+	C20H42O11	DTPCFIHYWYONMD-UHFFFAOYSA-N	86.9			Organic oxygen compounds	Organooxygen compounds	Ethers					2.53101e+07	3.4372e+07	3.14601e+07	2.26683e+07	3.13984e+07	2.71544e+07	1.3433e+07	2.07502e+07	2.58722e+07	2.57342e+07	2.55806e+07	2.44486e+07	0.0256292	458.273
MP5694	0.989	194.117	Ethyl N-benzylglycinate	[M+NH4]+	C11H15NO2	ULOLIZHBYWAICY-UHFFFAOYSA-N	86.8										4.76991e+07	4.26289e+07	4.13771e+07	4.36159e+07	4.24253e+07	4.26062e+07	3.65425e+07	3.66081e+07	4.39612e+07	4.39625e+07	4.39605e+07	4.52846e+07	0.0149369	193.11
MP9357	3.88	273.167	(E)-5-hydroxy-3-isobutyl-6-(3-methylbenzylidene)-1,6-dihydropyrazin-2(3H)-one	[M+H]+	C16H20N2O2	VVXVZIGIGDNTDE-NTEUORMPSA-N	86.7			Benzenoids	Benzene and substituted derivatives	Toluenes					9.2992e+07	1.01868e+08	1.24788e+08	1.27678e+08	3.28429e+07	4.7983e+07	2.23572e+07	2.74115e+07	7.88699e+07	7.81336e+07	7.81345e+07	7.81349e+07	0.00469579	272.152
MP15632	3.485	437.234	Nonaethylene glycol	[M+Na]+	C18H38O10	YZUUTMGDONTGTN-UHFFFAOYSA-N	86.7			Organic oxygen compounds	Organooxygen compounds	Ethers					4.66306e+06	7.53092e+06	5.65802e+06	4.50358e+06	7.06344e+06	6.95966e+06	3.14602e+06	5.32401e+06	6.09623e+06	6.09632e+06	5.96115e+06	6.09558e+06	0.0111254	414.246
MP7334	3.117	229.118	5-Oxo-D-prolyl-L-valine	[M+H]+	C10H16N2O4		86.7										2.79123e+06	2.02952e+06	1.19386e+06	1.43428e+06	654469	1.89717e+06	336760	238547	1.38052e+06	1.46792e+06	1.35361e+06	1.3526e+06	0.0391717	228.111
MP3166	1.475	138.091	etocarlide	[M+H]+	C17H20N2O2S	PRXHANOJNVGVGC-UHFFFAOYSA-N	86.7										466364	969721	1.87228e+06	1.49172e+06	1.69883e+06	705206	546710	598922	1.04358e+06	1.04354e+06	1.02657e+06	1.03382e+06	0.00796956	316.125
MP1669	0.969	100.075	2-Ethyl-2-oxazoline	[M+NH4]+	C5H9NO	NYEZZYQZRQDLEH-UHFFFAOYSA-N	86.7	HMDB0245112		Organoheterocyclic compounds	Azolines	Oxazolines					5.12665e+07	6.0452e+07	7.38039e+07	1.07357e+08	1.06859e+08	2.57528e+07	1.09945e+08	4.39957e+07	7.67323e+07	9.1026e+07	7.66523e+07	7.68191e+07	0.0889836	99.0684
MP5862	3.657	198.127	3-Allyl-1,1-dibenzylthiourea	[2M+NH4]+	C18H20N2S		86.7										1.41517e+08	7.07266e+07	8.46912e+07	6.41692e+07	1.1093e+08	8.50874e+07	5.41704e+07	6.80065e+07	8.38723e+07	8.34895e+07	8.29697e+07	8.34329e+07	0.00443349	296.135
MP11206	5.294	318.191	tripropylene glycol diacrylate	[M+Na]+	C15H24O6	LJRSZGKUUZPHEB-UHFFFAOYSA-N	86.7			Organic acids and derivatives	Carboxylic acids and derivatives	Dicarboxylic acids and derivatives					3.48859e+06	1.58345e+06	6.92616e+06	6.12192e+06	5.81313e+06	3.43543e+06	3.19249e+06	4.12933e+06	4.43345e+06	4.30047e+06	4.42591e+06	4.40482e+06	0.0140428	300.157
MP5047	5.367	180.138	Mexiletine	[M+H-H2O]+	C11H17NO	VLPIATFUUWWMKC-UHFFFAOYSA-N	86.6	HMDB0014523	C07220	Benzenoids	Phenol ethers						1.22688e+06	1.03019e+06	866123	1.81871e+06	2.79345e+06	2.38424e+06	1.6403e+06	2.25398e+06	1.71264e+06	1.72278e+06	1.69063e+06	1.72635e+06	0.00937739	179.131
MP11956	5.47	337.104	2-(2,3-Dimethoxyphenyl)-5-methoxy-2,3-dihydro-4H-chromen-4-one	[M+Na]+	C18H18O5		86.6										8.16082e+06	8.56801e+06	4.03413e+06	3.34187e+06	533238	575654	769892	1.38432e+06	3.29553e+06	3.29589e+06	3.19048e+06	3.12182e+06	0.0264457	314.115
MP2209	5.626	113.096	1-methoxycyclohex-1-ene	[M+H]+	C7H12O	HZFQGYWRFABYSR-UHFFFAOYSA-N	86.6			Organic oxygen compounds	Organooxygen compounds						550603	415233	581441	585452	534453	571132	657752	634824	509057	346663	467986	508525	0.167477	112.089
MP2498	0.941	121.039	6-Oxo-1,6-dihydro-3-pyridinecarbonitrile	[M+H]+	C6H4N2O	CCQUUHVUQQFTGV-UHFFFAOYSA-N	86.5										7.03581e+06	9.10509e+06	1.1437e+07	7.54093e+06	1.08776e+06	2.20131e+06	467688	480053	5.05142e+06	5.05117e+06	4.89361e+06	5.05102e+06	0.0157219	120.032
MP10063	3.525	290.12	N-Benzyl-2,4,6-trimethylbenzenesulfonamide	[M+Na]+	C16H19NO2S	CIYJYQNDEGEPBQ-UHFFFAOYSA-N	86.5										128042	400578	394059	312471	341257	100133	2.05324e+06	1.47945e+06	48274.9	53787.2	53702.1	24375.5	0.311143	289.114
MP22747	4.692	625.329	Dauricine	[M+H]+	C38H44N2O6	AQASRZOCERRGBL-GPHMJDBDNA-N	86.5	HMDB0250881	C09419	Organoheterocyclic compounds	Isoquinolines and derivatives	Benzylisoquinolines	Alkaloids	Alkaloids derived from tyrosine	Isoquinoline alkaloids		6.16262e+06	8.94211e+06	9.33389e+06	6.16306e+06	1.16561e+06	645650	931284	938275	4.09679e+06	4.18937e+06	4.33411e+06	4.09714e+06	0.0267959	624.32
MP10374	4.221	298.162	(4-Benzyl-1-piperidinyl)(2-fluorophenyl)methanone	[M+Na]+	C19H20FNO		86.4										1.01139e+06	1.00107e+06	996107	942132	1.81171e+06	1.32415e+06	780438	885025	1.11871e+06	1.10938e+06	1.1452e+06	1.10288e+06	0.0166299	297.153
MP4172	0.695	160.133	methacholine	[M+CH3OH+H]+	C8H18NO2	NZWOPGCLSHLLPA-UHFFFAOYSA-N	86.4	HMDB0015654	C07471	Organic nitrogen compounds	Organonitrogen compounds	Quaternary ammonium salts					567996	544117	512639	1.28453e+06	305698	338943	275448	257734	498714	498691	498666	511724	0.0129833	160.134
MP221	6.657	73.0646	9,17-Octadecadiene-12,14-diyne-1,11,16-triol	[M+H]+	C4H8O	MKUWVMRNQOOSAT-SCSAIBSYSA-N	86.4			Organic oxygen compounds	Organooxygen compounds	Alcohols and polyols					3.15797e+06	3.31758e+06	2.86181e+06	2.97223e+06	2.6395e+06	3.2543e+06	3.1267e+06	2.79045e+06	3.40129e+06	3.46296e+06	3.40079e+06	3.51005e+06	0.015378	72.0575
MP5044	0.941	180.102	Methyl N-benzylglycinate	[M+H]+	C10H13NO2		86.4										293864	755748	1.95237e+06	393621	3.471e+06	403164	323036	285620	900873	1.00221e+06	927370	938906	0.0455995	179.095
MP8509	5.605	255.231	Palmitoleic acid	[M+H-H2O]+	C16H30O2	SECPZKHBENQXJG-FPLPWBNLSA-N	86.4	HMDB0003229	C08362	Lipids and lipid-like molecules	Fatty Acyls	Fatty acids and conjugates	Lipids	Fatty acids	Unsaturated fatty acids		1.46167e+06	1.48102e+06	1.72696e+06	1.54621e+06	2.16976e+06	1.79455e+06	1.64425e+06	1.82902e+06	1.73027e+06	1.73043e+06	1.76251e+06	1.74706e+06	0.00886777	254.225
MP8108	0.628	246.181	desvenlafaxine	[M+NH4]+	C16H25NO2	KYYIDSXMWOZKMP-UHFFFAOYSA-N	86.4	HMDB0015646		Organic oxygen compounds	Organooxygen compounds	Alcohols and polyols					559648	1.08456e+06	774515	334538	41443.7	301760	39572	6935.18	299028	310638	285108	306159	0.0371684	263.189
MP11659	5.537	330.075	Cirsilineol	[M+H]+	C18H16O7	VKOSQMWSWLZQPA-UHFFFAOYSA-N	86.4	HMDB0303612	C10032	Phenylpropanoids and polyketides	Flavonoids	O-methylated flavonoids	Lipids	PK Polyketides	PK12 Flavonoids		1.02878e+07	1.48244e+07	1.12744e+07	5.48189e+06	2.64332e+06	1.82801e+06	1.81691e+06	3.28093e+06	6.50869e+06	6.30325e+06	6.30275e+06	6.303e+06	0.0161845	344.09
MP848	7.411	83.0601	5-Methyl-1H-Imidazole	[M+H]+	C4H6N2	XLSZMDLNRCVEIJ-UHFFFAOYSA-N	86.3			Organoheterocyclic compounds	Azoles	Imidazoles					1.43342e+07	1.54913e+07	1.60702e+07	1.62151e+07	1.62778e+07	1.52488e+07	1.61696e+07	1.63882e+07	1.43246e+07	1.62531e+07	1.56227e+07	1.65261e+07	0.0625321	82.0531
MP13373	4.234	374.214	3-[(1E)-1-{4-[2-(Methylamino)ethoxy]phenyl}-2-phenyl-1-buten-1-yl]phenol	[2M+Na]+	C25H27NO2		86.3										1.34539e+07	87361	1.462e+06	2.19081e+07	2.0117e+06	1.31169e+06	2.01111e+06	1.52574e+06	1.24199e+07	1.22322e+07	1.22433e+07	1.22321e+07	0.00750384	373.204
MP6187	5.818	204.138	1-(1-Benzofuran-4-yl)-N-ethyl-2-propanamine	[M+H]+	C13H17NO		86.3										2.6953e+06	2.8196e+06	2.7068e+06	2.96154e+06	2.74533e+06	3.15416e+06	2.79921e+06	3.23192e+06	2.86986e+06	2.89199e+06	2.86998e+06	2.92193e+06	0.00852792	203.131
MP12808	5.046	359.116	Excavatin L	[M+H]+	C19H18O7	SREZIYPRWBLGDH-QOKNQOGYSA-N	86.3			Phenylpropanoids and polyketides	Coumarins and derivatives						16833.3	35006.8	28655.2	13679.5	549836	1.62162e+06	209846	67506.1	627916	628547	601113	507343	0.0970312	358.105
MP14521	4.046	406.194	enclomifene	[M+NH4]+	C26H28ClNO	GKIRPKYJQBWNGO-OCEACIFDSA-N	86.3										1.22729e+07	1.96802e+07	2.04447e+07	1.57789e+07	1.82057e+06	1.14061e+06	1.70041e+06	1.38341e+06	1.02768e+07	1.02764e+07	1.02772e+07	1.01004e+07	0.00861679	405.186
MP7691	4.697	237.232	8-(piperidin-1-ylmethyl)-decahydroquinoline	[M+H]+	C15H28N2	SVDDLFTVUZEYQM-UHFFFAOYSA-N	86.3			Organoheterocyclic compounds	Quinolidines						5.9812e+06	5.33279e+06	4.0424e+06	5.70612e+06	6.64103e+06	2.75612e+07	1.51124e+07	2.80015e+07	1.17258e+07	1.17273e+07	1.15828e+07	1.15811e+07	0.00716401	236.225
MP8200	5.749	248.164	Desmethylprodine	[M+H]+	C15H21NO2	BCQMRZRAWHNSBF-UHFFFAOYSA-N	86.2		C22797								419115	733715	638061	796930	1.27148e+06	2.91696e+06	2.0716e+06	2.87895e+06	1.33416e+06	1.27954e+06	1.26975e+06	1.26969e+06	0.024009	247.157
MP7538	3.43	234.076	5-[(5-hydroxypyridin-3-yl)methoxy]benzene-1,3-diol	[M+H]+	C12H11NO4	QYGPHCCLRUKGHD-UHFFFAOYSA-N	86.2			Benzenoids	Phenols	Benzenediols					508565	7381.86	21620.2	8365.4	722710	2.71576e+06	922762	521312	557569	599746	599675	589914	0.0340516	233.069
MP7237	3.285	227.175	1-Cyclohexyl-3-(tetrahydro-2-furanylmethyl)urea	[M+H]+	C12H22N2O2		86.2										1.26639e+07	1.33119e+07	1.92404e+07	1.54234e+07	1.86116e+07	1.00442e+07	1.04667e+07	9.83091e+06	1.38663e+07	1.50627e+07	1.42639e+07	1.38589e+07	0.0396641	226.168
MP20121	3.477	555.297	Condaline A	[M+H]+	C33H38N4O4	JDFUVCMEHULMNF-FMQUCBEENA-N	86.2										1.47773e+06	1.46012e+06	1.54175e+06	949533	614960	716362	423633	179773	1.07077e+06	1.05897e+06	1.05887e+06	1.10112e+06	0.0185773	554.289
MP6903	3.334	220.169	4-(2-Cyclohexylethoxy)aniline	[M+H-H2O]+	C14H21NO	KZIPKNLJWRDAKV-UHFFFAOYSA-N	86.2										1.61226e+06	1.49392e+06	1.36199e+06	2.04871e+06	1.74959e+06	1.90983e+06	1.46917e+06	1.82223e+06	1.70703e+06	1.74462e+06	1.68849e+06	1.66967e+06	0.0187871	219.162
MP4428	1.035	166.122	Hordenine	[M+H]+	C10H15NO	KUBCEEMXQZUPDQ-UHFFFAOYSA-N	86.2	HMDB0004366	C06199	Benzenoids	Benzene and substituted derivatives	Phenethylamines	Alkaloids	Alkaloids derived from tyrosine	Tyramine derivatives		314372	1.04872e+06	9.49785e+06	739471	1.75021e+07	1.02832e+06	473401	777428	3.879e+06	3.879e+06	3.815e+06	3.85569e+06	0.00782602	165.115
MP5607	1.978	192.138	2-NMC	[M+H]+	C12H17NO	GYXHTKZVPMDHQT-UHFFFAOYSA-N	86.2			Benzenoids	Benzene and substituted derivatives	Anilides					2.45967e+07	2.67651e+07	2.56788e+07	4.44155e+07	3.27314e+07	3.96763e+07	2.60842e+07	3.02278e+07	3.10716e+07	3.18943e+07	3.08905e+07	3.08926e+07	0.0153568	191.131
MP3244	1.196	140.034	N'-hydroxy-2-methyl-1,3-thiazole-4-carboximidamide	[M+NH4]+	C5H7N3OS	SLZGQHLQOOLDIA-UHFFFAOYSA-N	86.2										1.07805e+06	1.24522e+06	1.93718e+06	829638	55849.2	114527	29723.1	40660.2	677483	680626	679952	677587	0.00237755	157.031
MP9353	3.706	273.13	Decarbamoyl-neosaxitoxin	[M+NH4]+	C9H16N6O4	KUMXVBFFVVLQFX-IKMPGZOFSA-N	86.1	HMDB0033663		Phenylpropanoids and polyketides	Saxitoxins, gonyautoxins, and derivatives						2.16367e+07	3.0335e+07	4.28906e+07	6.47116e+07	3.43763e+06	1.56652e+06	2.33486e+06	2.2636e+06	1.96074e+07	2.58493e+07	2.58538e+07	2.59127e+07	0.128874	272.123
MP9434	3.244	275.048	2-Phenylbenzimidazole-5-sulfonic acid	[M+H]+	C13H10N2O3S	UVCJGUGAGLDPAA-UHFFFAOYSA-N	86.1			Organoheterocyclic compounds	Benzimidazoles	Phenylbenzimidazoles					2.8391e+07	2.71358e+07	3.88409e+07	2.75576e+07	2.54029e+07	1.99388e+07	1.79252e+07	1.71643e+07	2.45684e+07	2.49456e+07	2.47728e+07	2.43279e+07	0.0108032	274.041
MP8560	6.448	256.263	Muscone	[M+NH4]+	C16H30O	ALHUZKCOMYUFRB-OAHLLOKOSA-N	86.1	HMDB0034181		Organic oxygen compounds	Organooxygen compounds	Carbonyl compounds					4.68717e+06	4.84482e+06	4.14528e+06	4.22989e+06	5.50493e+06	6.56819e+06	5.33615e+06	6.72554e+06	5.10789e+06	5.20339e+06	5.07737e+06	5.07784e+06	0.0116449	238.23
MP5824	3.216	197.165	(1R,3r,8S,9r)-1,8-dimethyl-3,6-diazatricyclo[4.3.1.1(3,8)]undecan-9-ol	[M+H]+	C11H20N2O	JNARJHDJLSPXGM-UHFFFAOYSA-N	86.1			Organoheterocyclic compounds	Diazepanes	1,4-diazepanes					3.03265e+06	2.77401e+06	1.26009e+06	1.8367e+06	2.35882e+06	401834	710711	480516	1.04692e+06	1.04376e+06	1.04683e+06	1.00328e+06	0.0206038	196.158
MP8341	1.012	252.109	Cordycepin	[M+H]+	C10H13N5O3	OFEZSBMBBKLLBJ-BAJZRUMYSA-N	86.1	HMDB0250451	C08431	Nucleosides, nucleotides, and analogues	Purine nucleosides	Purine 3'-deoxyribonucleosides					1.72952e+06	4.5727e+06	4.16861e+06	2.99666e+06	2.77022e+06	1.24885e+06	1.27257e+06	1.13998e+06	2.37177e+06	2.38309e+06	2.38302e+06	2.33021e+06	0.0106095	251.102
MP7034	3.544	223.154	Tetraglyme	[M+H]+	C10H22O5	ZUHZGEOKBKGPSW-UHFFFAOYSA-N	86.1	HMDB0258894		Organic oxygen compounds	Organooxygen compounds	Ethers					2.92357e+06	3.23633e+06	2.93903e+06	3.24054e+06	2.57279e+06	2.62538e+06	1.91758e+06	2.20762e+06	1.84801e+06	1.86584e+06	1.83589e+06	1.83601e+06	0.00765134	222.147
MP6472	3.688	211.144	Cyclo(leucylprolyl)	[M+H]+	C11H18N2O2	SZJNCZMRZAUNQT-UHFFFAOYSA-N	86.1	HMDB0034276		Organic acids and derivatives	Carboxylic acids and derivatives	Amino acids, peptides, and analogues					737963	3.56324e+06	1.30203e+06	1.262e+06	2.72625e+06	2.02432e+06	951295	3.69527e+06	2.12458e+06	2.12499e+06	2.17753e+06	2.13709e+06	0.0116782	210.137
MP20364	6.405	561.395	15-ethyl-5-{12-ethyl-8,16-diazapentacyclo[10.6.1.0,.0,.0,]nonadeca-2,4,6-trien-10-yl}-1,11-diazapentacyclo[9.6.2.0,.0,.0,]nonadeca-2,4,6,8(18)-tetraene	[M+H]+	C38H48N4		86.1										2.62061e+06	3.86954e+06	6.9615e+06	6.94508e+06	4.90066e+06	9.48647e+06	6.31823e+06	1.02025e+07	6.32323e+06	6.30706e+06	6.21027e+06	6.21116e+06	0.00968473	560.388
MP22536	5.381	619.401	Tabernaebovine	[M+H]+	C40H50N4O2	JGSVLTPLGGGCRI-NTSJLCFDNA-N	86.1										1.27427e+07	2.54497e+07	2.63089e+07	1.73941e+07	3.87402e+06	2.44505e+06	3.3966e+06	3.32523e+06	1.40537e+07	1.41064e+07	1.33978e+07	1.38832e+07	0.0232816	618.393
MP4998	0.944	179.118	3-[(1R)-1-Methyl-1-oxido-2-pyrrolidinyl]pyridine	[M+H]+	C10H14N2O		86.1										1.74933e+06	2.18735e+06	2.38395e+06	1.97842e+06	1.89901e+06	946418	891234	581696	1.37977e+06	1.39217e+06	1.39216e+06	1.32847e+06	0.0221005	178.111
MP8792	3.084	261.13	2-(4-oxoquinazolin-3(4H)-yl)ethyl isobutyrate	[M+H]+	C14H16N2O3	DXZNCVRUZDRWLR-UHFFFAOYSA-N	86.1			Organoheterocyclic compounds	Diazanaphthalenes	Benzodiazines					5.96254e+06	8.31189e+06	6.35111e+06	6.90163e+06	8.31014e+06	8.56992e+06	4.07434e+06	4.9814e+06	6.84512e+06	6.92913e+06	6.69937e+06	6.96478e+06	0.0172037	260.116
MP9147	1.054	269.088	Inosine	[M+H]+	C10H12N4O5	UGQMRVRMYYASKQ-PKJMTWSGBE	86.1	HMDB0000195	C00294	Nucleosides, nucleotides, and analogues	Purine nucleosides		N-glycosides				304382	873404	873729	642360	1.10075e+06	906579	907116	669873	763735	757054	757096	759737	0.00414443	268.081
MP10373	4.943	298.141	stepharine	[M+H]+	C18H19NO3	XYYVYLMBEZUESM-CMKMFDCUSA-N	86.1			Alkaloids and derivatives	Morphinans						1.89149e+07	1.39856e+07	5.12847e+07	1.50279e+07	1.10782e+08	9.18544e+07	4.4452e+07	6.72822e+07	5.99921e+07	5.78763e+07	5.73008e+07	5.7703e+07	0.0207328	297.136
MP14181	5.535	397.161	1-{4-[2-(7-methoxy-2H-1,3-benzodioxol-5-yl)ethyl]phenoxy}-3-methylbutane-2,3-diol	[M+Na]+	C21H26O6	CAXDNOAMAQQQMX-UHFFFAOYSA-N	86.1			Phenylpropanoids and polyketides	Stilbenes						2.39847e+06	1.10977e+06	1.07238e+06	578178	3.2235e+06	5.88451e+06	1.03863e+07	8.07484e+06	2.19385e+06	2.11751e+06	2.06708e+06	2.06668e+06	0.0284176	374.173
MP5743	2.26	195.122	PEG-4	[M+H]+	C8H18O5	UWHCKJMYHZGTIT-UHFFFAOYSA-N	86.1	HMDB0094708		Organic oxygen compounds	Organooxygen compounds	Ethers					1.73188e+07	2.37186e+07	2.01115e+07	2.16605e+07	2.20129e+07	1.83242e+07	1.11306e+07	1.39494e+07	1.73457e+07	1.71347e+07	1.73454e+07	1.7293e+07	0.00577549	194.115
MP2466	3.609	120.055	1H-Benzotriazole	[M+H]+	C6H5N3	QRUDEWIWKLJBPS-UHFFFAOYSA-N	86.1	HMDB0244873		Organoheterocyclic compounds	Benzotriazoles						242257	1.26674e+06	1.65718e+06	1.39055e+06	851827	1.11345e+06	891010	1.3965e+06	1.13683e+06	1.15511e+06	1.13688e+06	1.14532e+06	0.00759772	119.048
MP5693	4.529	194.115	Isoprenaline	[M+H]+	C11H17NO3	JWZZKOKVBUJMES-UHFFFAOYSA-N	86.1	HMDB0015197	C07056	Benzenoids	Phenols	Benzenediols					3.45315e+06	4.45813e+06	2.90696e+06	3.09146e+06	3.70204e+06	4.01746e+06	4.15959e+06	3.95821e+06	3.51336e+06	3.8155e+06	3.82418e+06	3.46612e+06	0.0524211	211.121
MP6895	3.665	220.096	Folimine	[M+H]+	C12H13NO3	XFXPKEVQMIUIEY-UHFFFAOYSA-N	86.1			Organoheterocyclic compounds	Quinolines and derivatives	Quinolones and derivatives					1.41261e+06	8.11863e+06	2.25699e+06	2.64628e+06	6.97544e+06	4.11557e+06	1.8093e+06	7.71186e+06	4.35596e+06	4.2956e+06	4.31102e+06	4.29029e+06	0.00691401	219.09
MP6515	3.392	212.175	6-epi-monanchorin	[M+H]+	C11H21N3O	RVYXBEHIFHTIKB-KXUCPTDWSA-N	86.1			Organoheterocyclic compounds	Diazepines	1,3-diazepines					484211	886328	840638	607499	775271	404891	317307	308712	582459	592946	591169	586985	0.0079492	211.168
MP3208	0.94	139.05	pentoxyl	[2M+H]+	C6H8N2O3	XBAVGYMDOXCWQU-UHFFFAOYSA-N	86.1	HMDB0000544		Organoheterocyclic compounds	Diazines	Pyrimidines and pyrimidine derivatives					5.90769e+07	7.62071e+07	9.00178e+07	6.2676e+07	8.23084e+06	2.31936e+07	3.95832e+06	4.75996e+06	4.13374e+07	4.15363e+07	4.07795e+07	4.15358e+07	0.00865971	156.053
MP5423	3.293	188.093	Benzoguanamine	[M+ACN+H]+	C9H9N5	GZVHEAJQGPRDLQ-UHFFFAOYSA-N	86.1			Organoheterocyclic compounds	Triazines	Aminotriazines					6.85513e+06	6.70909e+06	1.4723e+07	1.10036e+07	9.26578e+06	1.56688e+07	5.35648e+06	6.27975e+06	9.37083e+06	9.43088e+06	9.31154e+06	9.43098e+06	0.00609317	187.086
MP3514	3.182	146.06	8-Hydroxyquinoline	[M+Na]+	C9H7NO	MCJGNVYPOGVAJF-UHFFFAOYSA-N	86.1		C19434	Organoheterocyclic compounds	Quinolines and derivatives	8-hydroxyquinolines					1.2458e+06	639284	627252	476065	346191	396433	261996	262769	540970	540849	540990	529295	0.0108198	145.053
MP5597	3.19	192.076	2,6-Toluene diisocyanate	[M+NH4]+	C9H6N2O2	RUELTTOHQODFPA-UHFFFAOYSA-N	86.1	HMDB0245517		Benzenoids	Benzene and substituted derivatives	Toluenes					9.53494e+06	8.15352e+06	1.13129e+07	1.01956e+07	4.23133e+06	4.41406e+06	3.53378e+06	3.10204e+06	6.79093e+06	6.79092e+06	6.79095e+06	6.7108e+06	0.00591768	174.043
MP6227	6.032	205.085	4-(Butoxycarbonyl)benzoic acid	[M+H]+	C12H14O4	QLUQHFODHZKSDT-UHFFFAOYSA-N	86.1			Benzenoids	Benzene and substituted derivatives	Benzoic acids and derivatives					1.71619e+07	1.87869e+07	1.66357e+07	1.69903e+07	1.81963e+07	1.85518e+07	1.7974e+07	2.02961e+07	1.75298e+07	1.80163e+07	1.79475e+07	1.80177e+07	0.0131081	222.089
MP6849	3.315	219.11	Abrine	[M+H]+	C12H14N2O2	CZCIKBSVHDNIDH-NSHDSACASA-N	86.1		C02983	Organic acids and derivatives	Carboxylic acids and derivatives	Amino acids, peptides, and analogues					6.52866e+06	5.79422e+06	6.25206e+06	1.15153e+07	1.11044e+07	1.53638e+07	1.67427e+06	6.73403e+06	7.88796e+06	8.09774e+06	7.99414e+06	7.88777e+06	0.0126261	218.106
MP4768	1.146	174.055	Desisopropylatrazine	[M+H-H2O]+	C5H8ClN5	IVENSCMCQBJAKW-UHFFFAOYSA-N	86.1			Organoheterocyclic compounds	Triazines	Aminotriazines					1.56517e+06	2.33762e+06	1.99572e+06	2.29694e+06	553381	251076	189811	184536	1.16798e+06	1.20495e+06	1.16145e+06	1.16139e+06	0.017807	173.047
MP6465	5.629	211.111	Linderazulene	[M+H]+	C15H14O	LMVGRKPOXLBIFQ-UHFFFAOYSA-N	86.1			Organoheterocyclic compounds	Cycloheptafurans						6.33586e+07	2.24085e+07	1.41868e+07	3.92385e+07	203895	102784	120509	274823	1.81058e+07	1.81058e+07	1.77959e+07	1.80458e+07	0.00819829	210.104
MP10829	4.131	309.226	2,5,8,11-Tetramethyl-3,6,9,12-tetraoxapentadecane-1,14-diol	[M+ACN+H]+	C15H32O6	AQRQHYITOOVBTO-UHFFFAOYSA-N	86.1			Organic oxygen compounds	Organooxygen compounds	Alcohols and polyols					1.49358e+08	2.02974e+08	2.56296e+08	2.36709e+08	3.13859e+07	4.85015e+07	2.85527e+07	2.87113e+07	1.20624e+08	1.20628e+08	1.19457e+08	1.17847e+08	0.0109949	308.22
MP9831	6.267	284.294	Stearamide	[M+NH4]+	C18H37NO	LYRFLYHAGKPMFH-UHFFFAOYSA-N	86	HMDB0034146	C13846	Organic acids and derivatives	Carboximidic acids and derivatives	Carboximidic acids	Lipids	FA Fatty acyls	FA08 Fatty amides		1.86252e+07	2.86344e+07	1.48053e+07	2.18423e+07	1.9238e+07	1.97655e+07	1.87354e+07	2.80422e+07	2.23216e+07	2.25955e+07	2.22808e+07	2.37179e+07	0.029652	283.288
MP19800	4.918	547.344	12,34-Oxamanzamine A	[M+H]+	C36H42N4O	HRRCSEVLGXSDBY-LHGWCFSLSA-N	86			Alkaloids and derivatives	Harmala alkaloids						9.60816e+06	2.49695e+07	2.84771e+07	1.65435e+07	3.26482e+06	1.55567e+06	2.34039e+06	2.25989e+06	1.30578e+07	1.30589e+07	1.28329e+07	1.27985e+07	0.0108837	546.336
MP9858	3.92	285.13	(2R,3R,4S,5S,6R)-2-[(3Z)-hex-3-en-1-yloxy]-6-(hydroxymethyl)oxane-3,4,5-triol	[M+Na]+	C12H22O6	OZIPFYKAIOOVEJ-ODWUMMNUSA-N	86			Lipids and lipid-like molecules	Fatty Acyls	Fatty acyl glycosides					412010	5.57383e+06	1.4872e+07	6.70721e+06	986093	381809	510318	515720	4.26458e+06	4.26471e+06	4.33058e+06	4.27156e+06	0.00746699	262.142
MP9810	1.04	284.098	Guanosine	[M+H]+	C10H13N5O5	NYHBQMYGNKIUIF-UUOKFMHZBU	86	HMDB0000133	C00387	Nucleosides, nucleotides, and analogues	Purine nucleosides		Nucleic acids	Nucleosides	Ribonucleosides		1.47569e+06	3.37957e+06	2.4986e+06	1.91985e+06	6.13488e+06	1.72694e+06	1.54308e+06	1.16172e+06	2.3062e+06	2.26063e+06	2.29333e+06	2.30626e+06	0.00939277	283.092
MP9777	5.39	283.145	2-(6,7-Dimethoxy-3,4-dihydroisoquinolin-1-yl)aniline	[M+ACN+H]+	C17H18N2O2	ITIDQYYXNGYNAM-UHFFFAOYSA-N	86			Organoheterocyclic compounds	Dihydroisoquinolines						4.20332e+06	2.65984e+06	1.61771e+06	1.60452e+06	3.01668e+06	2.48725e+06	2.97356e+06	2.8758e+06	1.61203e+06	1.57232e+06	1.57208e+06	1.5798e+06	0.0119864	282.137
MP16345	6.147	457.367	oleanolic acid	[M+H]+	C30H48O3	MIJYXULNPSFWEK-UHFFFAOYSA-N	86	HMDB0002364	C17148	Lipids and lipid-like molecules	Prenol lipids	Triterpenoids	Lipids	PR Prenol lipids	PR01 Isoprenoids		34948.2	206828	206035	307207	912746	23483.5	21206.6	16352	158271	147725	103834	158771	0.183237	456.36
MP9492	5.655	276.159	Rolipram	[M+H]+	C16H21NO3	HJORMJIFDVBMOB-UHFFFAOYSA-N	86	HMDB0257294		Organoheterocyclic compounds	Pyrrolidines	Phenylpyrrolidines					5.46952e+06	6.69601e+06	5.94058e+06	5.14108e+06	5.71228e+06	5.87592e+06	4.74861e+06	7.07431e+06	5.36721e+06	5.43153e+06	5.29123e+06	5.3455e+06	0.010829	275.152
MP11392	5.292	323.146	beta-D-glucosaminyl-(1->4)-D-glucosamine	[M+Na]+	C12H24N2O9	QLTSDROPCWIKKY-ZMYKSUFESA-N	86			Organic oxygen compounds	Organooxygen compounds	Carbohydrates and carbohydrate conjugates					2.09483e+06	752681	3.34541e+06	3.08749e+06	3.43489e+06	2.74213e+06	2.38753e+06	3.04593e+06	2.6863e+06	2.68624e+06	2.65823e+06	2.65847e+06	0.0060319	340.148
MP10575	4.744	302.305	Stearic acid	[2M+H]+	C18H36O2	QIQXTHQIDYTFRH-UHFFFAOYSA-N	86	HMDB0000827	C01530	Lipids and lipid-like molecules	Fatty Acyls	Fatty acids and conjugates	Lipids	Fatty acids	Saturated fatty acids		5.08078e+07	4.49244e+07	4.43098e+07	4.34247e+07	4.67928e+07	2.72697e+07	3.42683e+07	3.29918e+07	3.95748e+07	3.86944e+07	3.7929e+07	3.79295e+07	0.0203267	284.272
MP8559	6.845	256.263	N,N-Diethyldodecanamide	[M+H]+	C16H33NO	CWNSVVHTTQBGQB-UHFFFAOYSA-N	86			Lipids and lipid-like molecules	Fatty Acyls	Fatty amides					5.56857e+07	4.39076e+07	3.72805e+07	4.51215e+07	5.02842e+07	5.94133e+07	3.91373e+07	5.84526e+07	4.73142e+07	4.73167e+07	4.54788e+07	4.69537e+07	0.0187056	255.256
MP9904	4.619	286.273	C17 Sphingosine	[M+H]+	C17H35NO2	RBEJCQPPFCKTRZ-BUHFOSPRSA-N	86			Organic nitrogen compounds	Organonitrogen compounds	Amines					3.2628e+06	4.27289e+06	4.76613e+06	5.3379e+06	3.23614e+06	5.94328e+06	4.42272e+06	8.66291e+06	5.20009e+06	4.96208e+06	4.96095e+06	5.04938e+06	0.0223167	285.267
MP15110	3.327	423.219	Fludrocortisone acetate	[M+Na]+	C23H31FO6	SYWHXTATXSMDSB-UHFFFAOYSA-N	86	HMDB0252329	C08186	Lipids and lipid-like molecules	Steroids and steroid derivatives	Pregnane steroids	Lipids	ST Sterol lipids	ST02 Steroids		5.01412e+06	4.53866e+06	5.24676e+06	3.408e+06	2.01669e+06	2.51298e+06	1.3194e+06	1.30165e+06	3.10522e+06	3.29542e+06	3.23331e+06	3.20918e+06	0.0246668	422.21
MP11014	5.18	314.138	Cephalotaxinone	[M+H]+	C18H19NO4	VMMVTEUUDORRJX-UHFFFAOYNA-N	86										2.61635e+06	4.56065e+06	7.13614e+06	4.81847e+06	1.27388e+07	1.35312e+07	1.57345e+07	1.46998e+07	9.44709e+06	9.54282e+06	9.46941e+06	9.75511e+06	0.0146983	313.131
MP6662	0.66	215.069	Diphenyl carbonate	[M+NH4]+	C13H10O3	ROORDVPLFPIABK-UHFFFAOYSA-N	86		C14507	Benzenoids	Benzene and substituted derivatives	Phenoxy compounds					1.55628e+06	879067	523029	1.68716e+06	1.35463e+06	1.03199e+06	1.34558e+06	1.94954e+06	1.05506e+06	1.08881e+06	1.04831e+06	1.04758e+06	0.0184336	214.063
MP10022	3.516	289.162	Morphine D3	[2M+Na]+	C17H162H3NO3		86										8.68735e+06	1.42682e+07	1.80569e+07	1.67986e+07	1.6671e+06	1.53401e+06	1.66229e+06	1.30815e+06	8.21078e+06	8.34622e+06	8.2304e+06	8.21079e+06	0.00789235	432.279
MP7466	6.295	232.169	-Piperidinobutiophenone	[M+H]+	C15H21NO	VFLPICJWFQLLSY-UHFFFAOYSA-N	86			Organic oxygen compounds	Organooxygen compounds	Carbonyl compounds					260068	1.30944e+06	1.96498e+06	1.19589e+06	1.34003e+06	4.23119e+06	2.33963e+06	2.68402e+06	2.07193e+06	2.13785e+06	2.15561e+06	2.13445e+06	0.017199	231.162
MP6569	7.274	213.113	Rabenzazole	[M+H]+	C12H12N4	RUGYNGIMTAFTLP-UHFFFAOYSA-N	86										1.91443e+07	1.2723e+07	1.6873e+07	1.83451e+07	1.85114e+07	2.4809e+07	1.61023e+07	1.67537e+07	1.74346e+07	2.04907e+07	1.50064e+07	1.67796e+07	0.131117	212.106
MP13344	4.212	373.219	7a-acetoxy-15-methoxy-10-O-methyl-deacetyldihydrobotrydial	[M+H]+	C19H32O7	JDIHIHVNNCZGOU-YICUCPOMSA-N	85.9			Organoheterocyclic compounds	Oxanes						9.16262e+06	2.9408e+07	3.98514e+07	2.36957e+07	2.48077e+06	1.42751e+06	2.21887e+06	1.85478e+06	1.54412e+07	1.45116e+07	1.46267e+07	1.47326e+07	0.0282317	372.215
MP6574	4.179	213.159	1,4-diaza-2,5-dioxo-3-isobutylbicyclo[4.3.0]nonane	[M+H]+	C11H20N2O2	LPEJYDOQHAUJGY-UHFFFAOYSA-N	85.9			Organic acids and derivatives	Carboxylic acids and derivatives	Amino acids, peptides, and analogues					3.20147e+07	2.87936e+07	3.51753e+07	3.48259e+07	3.45617e+07	2.71303e+07	2.82059e+07	2.05952e+07	3.09419e+07	3.09431e+07	3.03139e+07	3.09438e+07	0.0102162	212.152
MP12578	5.553	353.135	7-(3,4-dihydroxyphenyl)-5-hydroxy-1-(4-hydroxyphenyl)heptan-3-one	[M+Na]+	C19H22O5	OAGXTVOZBKKJKA-UHFFFAOYSA-N	85.9			Phenylpropanoids and polyketides	Diarylheptanoids	Linear diarylheptanoids					6.42885e+06	3.09766e+06	1.14438e+06	1.49174e+06	4.3986e+06	4.24051e+06	8.57015e+06	6.14785e+06	2.16057e+06	2.13587e+06	2.07841e+06	2.02516e+06	0.0288629	330.147
MP14355	5.927	401.286	Poly THF n5	[M+Na]+	C20H42O6	PRXLONJYBZDUFU-UHFFFAOYSA-N	85.9										3.44043e+06	2.98323e+06	2.87462e+06	3.0722e+06	4.41602e+06	4.6083e+06	3.36029e+06	4.41839e+06	3.55294e+06	3.69642e+06	3.48021e+06	3.47855e+06	0.0288055	378.298
MP18850	6.153	523.265	(2R,3S,4S,5S,6R)-2-({7-hydroxy-4-[(3Z)-5-hydroxy-3-methylpent-3-en-1-yl]-4a,8,8-trimethyl-3-methylidene-decahydronaphthalen-2-yl}oxy)-6-(hydroxymethyl)oxane-3,4,5-triol	[M+H]+	C26H44O8		85.9										3.91944e+07	2.94026e+07	3.18769e+07	2.50159e+07	4.6767e+07	8.98962e+07	9.25827e+07	9.93632e+07	5.81085e+07	5.81764e+07	5.65185e+07	5.467e+07	0.0290796	484.304
MP14263	4.665	399.147	AB-FUBINACA 2A metabolite	[M+Na]+	C20H19FN4O4		85.9										306180	64608.1	23091	23755.4	16637.5	1.8922e+06	5404.97	2.19513e+06	112610	113485	90528.2	298827	0.631894	398.139
MP15987	4.617	447.292	PPG n7	[M+Na]+	C21H44O8	OWRNLGZKEZSHGO-UHFFFAOYSA-N	85.9			Organic oxygen compounds	Organooxygen compounds	Alcohols and polyols					6.58491e+07	9.04391e+07	1.04579e+08	7.57602e+07	1.35908e+07	1.81928e+07	1.65222e+07	1.55746e+07	5.64111e+07	5.48934e+07	5.47637e+07	5.47672e+07	0.0145585	424.304
MP18887	6.213	524.268	Methyl (2R,4S,6S,12bR)-4-(4-fluorophenyl)-2-{[3-(1H-imidazol-1-yl)propyl]amino}-1,2,3,4,6,7,12,12b-octahydroindolo[2,3-a]quinolizine-6-carboxylate	[M+ACN+H]+	C29H32FN5O2		85.9										22474.7	878678	76130.9	175444	79849.5	56307	103445	105201	52008.5	64325.6	91254.2	77593.3	0.237284	501.254
MP13408	4.009	375.198	16-acetyl-9-hydroxy-4-(2-methylpropyl)-2,5,16-triazatetracyclo[7.7.0.0,.0a,a]hexadeca-10,12,14-triene-3,6-dione	[M+Na]+	C19H23N3O4		85.9										8.13139e+06	1.59364e+07	2.6515e+07	1.99381e+07	1.90066e+06	962166	1.59731e+06	1.72964e+06	1.00738e+07	1.02299e+07	9.89314e+06	1.00232e+07	0.0138448	357.169
MP8752	3.666	260.089	skimmianine	[M+H]+	C14H15NO4	CKDKGHDDRAMHGK-UHFFFAOYSA-N	85.9	HMDB0258333	C10740	Organoheterocyclic compounds	Quinolines and derivatives	Dihydrofuranoquinolines	Alkaloids	Alkaloids derived from tryptophan and anthranilic acid	Quinoline alkaloids		1.60853e+06	8.96914e+06	2.28246e+06	3.23979e+06	8.00114e+06	5.75945e+06	2.12857e+06	9.80497e+06	5.2569e+06	5.49055e+06	5.49121e+06	5.49167e+06	0.0215594	261.1
MP9608	3.531	279.17	Tolycaine	[M+H-H2O]+	C15H22N2O3	UDKICLZCJWQTLS-UHFFFAOYSA-N	85.9			Benzenoids	Benzene and substituted derivatives	Benzoic acids and derivatives					432863	1.42491e+06	1.63423e+06	1.03426e+06	866411	875246	952448	998528	1.00223e+06	992453	950853	1.00225e+06	0.0248253	278.163
MP14270	6.382	399.271	PEG Monolaurate n4	[M+H]+	C20H40O6	DYQXMFHEZICODL-UHFFFAOYSA-N	85.9										5.29656e+06	5.41534e+06	3.43773e+06	3.78439e+06	5.38736e+06	7.09789e+06	5.66226e+06	2.8961e+07	7.09561e+06	7.09999e+06	6.81012e+06	6.57972e+06	0.0363827	376.282
MP6014	0.673	201.123	(3S,6S)-3-(Hydroxymethyl)-6-Isobutylpiperazine-2,5-Dione	[M+H]+	C9H16N2O3	ANLAGVXTPHOKLD-BQBZGAKWSA-N	85.9			Organic acids and derivatives	Carboxylic acids and derivatives	Amino acids, peptides, and analogues					437473	659362	2.75539e+06	603856	6.09529e+06	468208	421421	320007	1.43454e+06	1.43462e+06	1.41228e+06	1.42762e+06	0.00736749	200.116
MP9050	5.734	267.172	Tributyl phosphate	[M+H]+	C12H27O4P	STCOOQWBFONSKY-UHFFFAOYSA-N	85.9	HMDB0259164	C14439	Organic acids and derivatives	Organic phosphoric acids and derivatives	Phosphate esters					8.13388e+06	1.77876e+07	7.10252e+06	6.54547e+06	1.76392e+07	1.12087e+07	5.26028e+06	5.3293e+06	9.70237e+06	9.70229e+06	9.41225e+06	9.70266e+06	0.0150673	266.165
MP7333	1.607	229.118	(s)-atpa	[M+H]+	C10H16N2O4	PIXJURSCCVBKRF-ZCFIWIBFSA-N	85.9		C13733	Organic acids and derivatives	Carboxylic acids and derivatives	Amino acids, peptides, and analogues					4461.53	6606.77	7667.38	4484.41	3.68964e+06	231537	443356	443356	9374.76	12365.5	14075.7	14115.2	0.178389	228.111
MP4959	0.906	178.122	6-(2-Aminopropyl)-2,3-dihydrobenzofuran	[M+H]+	C11H15NO	VRNGXHJGMCJRSQ-UHFFFAOYSA-N	85.9			Organoheterocyclic compounds	Coumarans						1.57576e+06	2.26365e+06	1.99703e+06	1.76736e+06	1.64024e+06	998119	1.89056e+06	1.18362e+06	1.65888e+06	1.63095e+06	1.6646e+06	1.67063e+06	0.0105931	177.115
MP11991	5.556	338.172	1-[2-Hydroxy-3-(4-methyl-2-nitrophenoxy)propyl]piperidine-4-carboxamide	[M+H]+	C16H23N3O5	SKRBYZSAQPFRPY-UHFFFAOYSA-N	85.8										1.79922e+06	2.35857e+06	3.2338e+07	2.33127e+06	7.37203e+07	1.12091e+08	7.35672e+07	8.35419e+07	4.75875e+07	4.75973e+07	4.66596e+07	4.66419e+07	0.0115383	337.164
MP7806	5.104	240.138	Desmethyl nefopam	[M+H]+	C16H17NO	ZMOHJRCONJZNKH-UHFFFAOYSA-N	85.8			Organic nitrogen compounds	Organonitrogen compounds	Amines					1.37463e+06	1.63995e+06	2.08949e+06	1.52812e+06	2.1122e+06	911967	1.42992e+06	882033	1.51998e+06	1.52846e+06	1.49135e+06	1.52852e+06	0.011612	239.131
MP3987	0.651	156.063	5-[1-(2,3-Dimethylphenoxy)ethyl]-4-ethyl-2,4-dihydro-3H-1,2,4-triazole-3-thione	[M+NH4]+	C14H19N3OS		85.8										290208	393767	39867.1	35581.2	2.27552e+06	323719	30709.7	17904.2	475110	475644	245903	358282	0.283133	277.125
MP2502	0.649	121.072	Urea	[M+ACN+H]+	CH4N2O	XSQUKJJJFZCRTK-UHFFFAOYSA-N	85.8	HMDB0000294	C00086	Organic acids and derivatives	Organic carbonic acids and derivatives	Ureas					3.84207e+06	4.28074e+06	5.06509e+06	3.02488e+06	2.11108e+06	2.09023e+06	2.06783e+06	2.16764e+06	2.96582e+06	2.93825e+06	2.97564e+06	2.97556e+06	0.00595779	60.0324
MP2364	2.77	117.091	butan-2-yl acetate	[M+H]+	C6H12O2	DCKVNWZUADLDEH-UHFFFAOYSA-N	85.8			Organic acids and derivatives	Carboxylic acids and derivatives	Carboxylic acid derivatives					886175	938461	1.83181e+06	1.72606e+06	1.65839e+06	1.21836e+06	1.28734e+06	1.72364e+06	1.39487e+06	1.36475e+06	1.2543e+06	1.39522e+06	0.0494481	116.084
MP11753	4.905	332.315	Oleoyl ethanolamide	[M+CH3OH+H]+	C20H39NO2	BOWVQLFMWHZBEF-KTKRTIGZSA-N	85.8	HMDB0002088	C20792	Organic nitrogen compounds	Organonitrogen compounds	Amines					6.56673e+06	3.70554e+06	5.40085e+06	4.27344e+06	3.72043e+06	5.52576e+06	6.26761e+06	1.01602e+07	6.09281e+06	5.91708e+06	5.86745e+06	5.61953e+06	0.0332625	325.298
MP20506	4.378	565.354	Manzamine E	[M+H]+	C36H44N4O2	LTHULOBARTYAMF-BSRPTKABSA-N	85.8										7.5034e+06	1.0696e+07	1.12654e+07	7.90541e+06	1.21764e+06	806866	1.12085e+06	1.11666e+06	5.7097e+06	5.67026e+06	5.64476e+06	5.66552e+06	0.00478164	564.346
MP7728	5.318	238.216	(1r,2s,3s,5s,9r)-2-ethyl-1-methyl-13-azatricyclo[7.3.1.0,]tridecan-3-ol	[M+H]+	C15H27NO		85.8										3.22955e+06	3.04921e+06	2.83242e+06	2.8998e+06	3.47345e+06	3.69478e+06	3.31055e+06	3.44678e+06	3.29327e+06	3.27122e+06	3.23221e+06	3.29355e+06	0.00881971	237.209
MP1283	3.662	91.055	benzyl alcohol	[M+H]+	C7H8O	WVDDGKGOMKODPV-UHFFFAOYSA-N	85.8	HMDB0003119	C00556	Benzenoids	Benzene and substituted derivatives	Benzyl alcohols					2.13527e+06	1.89888e+06	2.15826e+06	1.46554e+06	2.62363e+06	2.06548e+06	1.23558e+06	1.75105e+06	1.89248e+06	1.8925e+06	1.8925e+06	1.87649e+06	0.00423766	108.058
MP12109	6.528	341.265	Docosahexaenoic acid	[M+Na]+	C22H32O2	MBMBGCFOFBJSGT-KUBAVDMBSA-N	85.8	HMDB0002183	C06429	Lipids and lipid-like molecules	Fatty Acyls	Fatty acids and conjugates	Lipids	Fatty acids	Unsaturated fatty acids		1.25982e+07	9.24904e+06	1.07374e+07	1.14544e+07	1.80642e+07	5.16066e+07	3.26946e+07	4.62136e+07	2.20522e+07	2.20545e+07	2.20837e+07	1.80196e+07	0.0960444	328.24
MP5138	5.323	182.009	2-Methyl-S-benzothiazole	[M+H]+	C8H7NS2	UTBVIMLZIRIFFR-UHFFFAOYSA-N	85.8			Organoheterocyclic compounds	Benzothiazoles						1.38531e+06	1.30271e+06	1.30871e+06	1.30958e+06	1.32575e+06	1.4417e+06	1.42865e+06	1.565e+06	1.40026e+06	1.38093e+06	1.38287e+06	1.38096e+06	0.00676557	181.002
MP11059	4.781	315.156	Gibberellin A73	[M+H]+	C19H22O4	URQVNHAGIRVMLB-KSPULMHRSA-N	85.8			Lipids and lipid-like molecules	Prenol lipids	Terpene lactones					4.54071e+06	800058	1.40475e+06	495705	2.16597e+06	496274	737104	1.00572e+06	2.00388e+06	1.84315e+06	1.67043e+06	1.69099e+06	0.0860144	314.152
MP8326	3.879	251.185	PPG n4	[M+NH4]+	C12H26O5	QVHMSMOUDQXMRS-UHFFFAOYSA-N	85.8			Organic oxygen compounds	Organooxygen compounds	Alcohols and polyols					8.87491e+07	1.03302e+08	1.30899e+08	1.22498e+08	3.20848e+07	4.20467e+07	1.95353e+07	2.43217e+07	6.98535e+07	7.00185e+07	6.96316e+07	6.962e+07	0.00274286	250.178
MP17429	6.378	487.323	PEG Monolaurate n6	[2M+NH4]+	C24H48O8	IDTQVQPVUYLMJJ-UHFFFAOYSA-N	85.8										785027	1.1465e+06	649285	813421	1.63218e+06	2.25943e+06	1.38634e+06	1.11911e+07	1.9389e+06	1.90154e+06	1.92238e+06	1.8814e+06	0.0130767	464.335
MP10371	3.043	298.096	5'-Deoxy-5'-methylthioadenosine	[M+H]+	C11H15N5O3S	WUUGFSXJNOTRMR-IOSLPCCCSA-N	85.8	HMDB0001173	C00170	Nucleosides, nucleotides, and analogues	5'-deoxyribonucleosides	5'-deoxy-5'-thionucleosides					385768	508933	635855	427228	477934	477557	674085	465563	536401	516959	524396	516959	0.0175246	297.09
MP5376	0.633	187.107	pro-ala	[2M+Na]+	C8H14N2O3	FELJDCNGZFDUNR-WDSKDSINSA-N	85.8	HMDB0029010		Organic acids and derivatives	Carboxylic acids and derivatives	Amino acids, peptides, and analogues					388900	996299	9.30761e+06	1.00966e+06	1.17976e+07	1.37432e+06	1.02227e+06	1.10181e+06	3.58224e+06	3.50545e+06	3.56966e+06	3.59694e+06	0.0113142	186.1
MP6799	3.917	218.072	4-allyl-3-phenyl-4,5-dihydro-1H-1,2,4-triazole-5-thione	[M+H]+	C11H11N3S		85.8										15386.4	105802	22436.9	426211	482598	743100	408562	521832	201706	225497	225558	225477	0.0542099	217.067
MP5815	4.434	197.096	4-Methylbenzophenone	[M+Na]+	C14H12O	WXPWZZHELZEVPO-UHFFFAOYSA-N	85.8			Benzenoids	Benzene and substituted derivatives	Benzophenones					2.54126e+06	1.30655e+06	1.05043e+06	2.4458e+06	411047	325882	95605.5	748132	941580	941629	876150	941747	0.0353962	196.089
MP10428	4.689	299.109	Citroflex 2	[M+Na]+	C12H20O7	DOOTYTYQINUNNV-UHFFFAOYSA-N	85.8	HMDB0034263		Organic acids and derivatives	Carboxylic acids and derivatives	Tricarboxylic acids and derivatives					2.48556e+06	4.90251e+06	5.57893e+06	4.52874e+06	7.97364e+06	8.98192e+06	4.08147e+06	3.79929e+06	6.10319e+06	6.40052e+06	6.37139e+06	6.31516e+06	0.0213317	276.121
MP19740	7.2	545.401	Poly THF n7	[M+NH4]+	C28H58O8	GLMVYOLOOZINLY-UHFFFAOYSA-N	85.8										4.01969e+06	2.52791e+06	2.88692e+06	3.87611e+06	5.34374e+06	8.25321e+06	5.6666e+06	7.71757e+06	4.97811e+06	4.97771e+06	4.88181e+06	4.87923e+06	0.0114092	522.413
MP22611	5.278	621.417	PPG n10	[M+Na]+	C30H62O11	MCVKSYYBBHNAFN-UHFFFAOYSA-N	85.8			Organic oxygen compounds	Organooxygen compounds	Alcohols and polyols					6.90056e+07	8.28181e+07	7.42557e+07	5.03937e+07	1.33958e+07	1.76821e+07	2.36282e+07	2.19081e+07	4.71837e+07	4.71878e+07	4.64954e+07	4.6495e+07	0.00851173	598.429
MP16699	3.392	467.245	Dicitrinone A	[M+H]+	C28H34O6	MHUSJVQTUWEZLL-BQGCOEIASA-N	85.8			Organoheterocyclic compounds	Benzopyrans						3.74498e+06	3.5571e+06	4.11299e+06	2.49322e+06	1.55973e+06	1.91131e+06	1.21482e+06	1.07964e+06	2.5329e+06	2.52173e+06	2.52139e+06	2.58755e+06	0.0124202	466.236
MP5732	4.638	195.065	Methyl caffeate	[M+H]+	C10H10O4	OCNYGKNIVPVPPX-HWKANZROSA-N	85.7		C10477	Phenylpropanoids and polyketides	Cinnamic acids and derivatives	Hydroxycinnamic acids and derivatives					5.96873e+06	5.88099e+06	5.55335e+06	6.11414e+06	5.88395e+06	5.94437e+06	5.59345e+06	6.07402e+06	5.92415e+06	5.97537e+06	6.04766e+06	6.08245e+06	0.011852	194.058
MP20439	5.068	563.375	PPG n9	[2M+H]+	C27H56O10	DXVLAUMXGHQKAV-UHFFFAOYSA-N	85.7			Organic oxygen compounds	Organooxygen compounds	Alcohols and polyols					6.29946e+07	8.76247e+07	8.17403e+07	5.78524e+07	1.53121e+07	1.90701e+07	2.22304e+07	2.3073e+07	4.98766e+07	4.98794e+07	4.86744e+07	4.98581e+07	0.0120743	540.387
MP7223	3.445	227.089	Sphecoline G	[M+H]+	C13H10N2O2	IKXVCSKDYINBFT-UHFFFAOYSA-N	85.7			Organoheterocyclic compounds	Indoles and derivatives	Pyridoindoles					1.71614e+06	1.0667e+06	2.51624e+06	1.59538e+06	209313	96799.9	72492.6	102588	353544	591980	362786	424035	0.255032	226.074
MP12345	3.758	347.203	6beta-Naltrexol-d3	[2M+Na]+	C20H222H3NO4		85.7										1.40419e+07	2.23369e+07	2.72226e+07	2.38475e+07	2.1969e+06	1.29176e+06	3.33289e+06	2.0921e+06	1.25625e+07	1.26545e+07	1.25347e+07	1.25346e+07	0.0045171	544.743
MP16474	4.607	461.271	virgaurin A	[M+H]+	C30H36O4	MNCXUJFIAOBROW-HXWKFQQESA-N	85.7			Lipids and lipid-like molecules	Prenol lipids	Sesquiterpenoids					7.52839e+06	9.94057e+06	1.48831e+07	8.26192e+06	1.36228e+06	292463	291067	173751	6.30154e+06	6.39929e+06	6.38277e+06	6.08208e+06	0.0231985	460.261
MP11165	5.878	317.21	17-Oxo-15-kauren-19-oic acid	[M+H]+	C20H28O3	DIURMAFIAYOVGU-PMHNSBFUSA-N	85.7			Lipids and lipid-like molecules	Prenol lipids	Diterpenoids					2.05867e+07	8.75574e+06	1.80528e+07	9.94765e+06	1.0108e+07	2.04973e+06	1.75135e+06	6.18663e+06	9.48789e+06	9.65434e+06	9.45514e+06	9.7331e+06	0.0138722	316.204
MP20029	4.322	553.26	(5,6,7,9,16)-16-(-D-Glucopyranosyloxy)-6,7,17-trihydroxykauran-19-oic acid	[M+Na]+	C26H42O11		85.7										133692	7.28442e+06	2.02021e+06	342472	17360.6	858635	162140	14911.4	1.53649e+06	1.44585e+06	1.42464e+06	1.40783e+06	0.0394454	530.273
MP5953	3.097	200.047	2-Chloro-L-phenylalanine-IS	[M+ACN+H]+	C9H10ClNO2		85.7										2.12264e+09	2.1497e+09	2.15319e+09	2.11234e+09	2.25072e+09	2.12476e+09	2.18087e+09	2.24196e+09	2.14518e+09	2.13005e+09	2.13e+09	2.14534e+09	0.00411533	199.04
MP4422	1.728	166.086	phenyl-Alanine	[M+H]+	C9H11NO2	XWKAVQKJQBISOL-ZETCQYMHSA-N	85.7	HMDB0250791	C02057	Organic acids and derivatives	Carboxylic acids and derivatives	Amino acids, peptides, and analogues					2.37859e+06	1.48838e+07	1.22699e+07	5.98657e+06	6.63448e+06	2.40334e+07	6.18754e+06	5.72253e+06	9.98307e+06	9.9578e+06	9.94727e+06	9.9472e+06	0.00169743	165.079
MP5865	4.065	198.148	(4S)-4-Cyclohexyl-L-proline	[M+Na]+	C11H19NO2	XRZWVSXEDRYQGC-ZJUUUORDSA-N	85.6			Organic acids and derivatives	Carboxylic acids and derivatives	Amino acids, peptides, and analogues					1.33531e+06	1.75158e+06	1.30235e+06	5.98243e+06	2.0795e+06	3.70104e+06	1.38832e+06	6.50942e+06	3.13906e+06	3.15393e+06	3.1184e+06	3.15404e+06	0.00536235	197.142
MP7952	3.113	243.083	4-(4-nitrophenylazo)aniline	[M+CH3OH+H]+	C12H10N4O2	UNBOSJFEZZJZLR-UHFFFAOYSA-N	85.6			Organoheterocyclic compounds	Azobenzenes						1.10936e+06	1.08674e+06	201998	413222	147284	32370.8	294222	106359	344457	233330	277794	235966	0.190113	242.08
MP1104	0.941	88.039	DL-3-Aminoalanine	[M+H]+	C3H8N2O2	PECYZEOJVXMISF-UHFFFAOYSA-N	85.6			Organic acids and derivatives	Carboxylic acids and derivatives	Amino acids, peptides, and analogues					1.12094e+06	951953	1.00839e+06	1.12379e+06	1.09542e+06	818476	929796	918395	936426	1.02914e+06	996917	1.04055e+06	0.0466622	104.059
MP3519	2.629	146.117	Methyl L-isoleucinate	[M+H]+	C7H15NO2	YXMMTUJDQTVJEN-WDSKDSINSA-N	85.6			Organic acids and derivatives	Carboxylic acids and derivatives	Amino acids, peptides, and analogues					772593	138623	85858.3	172098	136610	134645	45431.3	101745	235050	198350	235475	225733	0.078054	145.11
MP8275	4.812	250.177	(-)-O-Desmethyl Tramadol	[M+CH3OH+H]+	C15H23NO2	UWJUQVWARXYRCG-UKRRQHHQSA-N	85.6	HMDB0060997		Benzenoids	Benzene and substituted derivatives	Cyclohexylphenols					6.29052e+06	6.4358e+06	5.47381e+06	2.87281e+07	1.0604e+07	1.54657e+07	1.27648e+07	6.54715e+07	2.83696e+07	2.54834e+07	2.35639e+07	2.36771e+07	0.0887728	249.173
MP7078	0.965	224.128	5,6,7-trimethoxy-1,2,3,4-tetrahydroisoquinoline	[M+H]+	C12H17NO3	HMJWNMXNHQIAGT-UHFFFAOYSA-N	85.6			Organoheterocyclic compounds	Tetrahydroisoquinolines						1.26251e+07	1.09648e+07	8.06552e+06	1.1622e+07	8.21766e+06	1.27603e+07	2.11807e+07	6.69687e+06	9.93564e+06	9.29838e+06	1.01945e+07	1.01978e+07	0.0427652	223.121
MP6462	5.188	211.086	Pyocyanin	[M+H]+	C13H10N2O	YNCMLFHHXWETLD-UHFFFAOYSA-N	85.6	HMDB0256934	C01748	Organoheterocyclic compounds	Diazanaphthalenes	Benzodiazines					251426	198897	1.06806e+06	342718	1.06864e+06	1.0039e+06	1.10873e+06	1.18613e+06	761130	717052	717090	717059	0.0302594	210.079
MP11476	5.167	325.098	4',5'-dihydro-4'-(5-methoxyphenyl)spiro[2H-1-benzothiopyran-3(4H)m3'-[3H]pyrazole]-4-one	[M+H]+	C18H16N2O2S		85.6										870493	870768	234616	870768	591599	1.49924e+06	1.83474e+06	1.59176e+06	706157	687695	695920	707931	0.0135022	324.093
MP13178	5.222	369.151	(3as,4r,4as,5r,7s,7as,9r,9ar)-9-(acetyloxy)-5,7-dihydroxy-4a-methyl-3-methylidene-2-oxo-octahydro-3ah-azuleno[6,5-b]furan-4-yl acetate	[M+H]+	C18H24O8	LKSYWMYIMNIGES-BXVGOGIESA-N	85.6			Organic acids and derivatives	Carboxylic acids and derivatives	Tricarboxylic acids and derivatives					3.28798e+07	3.37698e+07	4.26815e+07	2.96874e+07	5.25294e+07	2.4524e+07	2.02879e+07	2.17738e+07	3.35407e+07	3.35486e+07	3.2724e+07	3.30441e+07	0.0121399	368.147
MP11322	5.459	321.139	[(2R,4S,5S)-5-Ethynyl-1-azabicyclo[2.2.2]oct-2-yl]methyl (2,4-difluorophenyl)carbamate	[M+H]+	C17H18F2N2O2		85.6										27688.1	411444	27034.3	411785	42486.7	1.27301e+06	919319	980792	347862	347787	369605	347896	0.030791	320.134
MP9517	4.434	277.104	8-[3-(2-hydroxypropan-2-yl)oxiran-2-yl]-7-methoxychromen-2-one	[M+H]+	C15H16O5	LXMXGXFDNSURAX-UHFFFAOYSA-N	85.6			Phenylpropanoids and polyketides	Coumarins and derivatives						248328	459647	646378	101965	3.77163e+06	5.68456e+06	1.61746e+06	3.63063e+06	1.53526e+06	1.48764e+06	1.45547e+06	1.45672e+06	0.0252143	276.1
MP15405	5.734	431.31	(2'R,5'R,9S)-4-hydroxy-5',6a,8a,9-tetramethylicosahydrospiro[naphtho[2',1':4,5]indeno[2,1-b]furan-10,2'-pyran]-2(11aH)-one	[M+H]+	C27H42O4	WOJKRRDDERNLBU-VFPBFMKCSA-N	85.5			Lipids and lipid-like molecules	Prenol lipids	Triterpenoids					2.215e+07	3.33463e+07	3.2596e+07	2.05602e+07	1.95401e+06	1.31195e+06	3.14836e+06	1.07393e+06	1.55025e+07	1.57521e+07	1.5236e+07	1.54379e+07	0.0137445	430.308
MP19503	5.792	539.26	Emetine Hydrochloride	[M+Na]+	C29H41ClN2O4	HUEYSSLYFJVUIS-MRFSYGAJSA-N	85.5	HMDB0035595		Alkaloids and derivatives	Emetine alkaloids						3.09366e+06	4.92919e+06	2.08998e+06	2.64722e+06	5.25087e+06	4.15483e+06	3.86931e+06	4.98763e+06	3.68937e+06	3.68717e+06	3.10154e+06	3.52984e+06	0.079159	516.275
MP8225	4.269	249.109	(2R)-2-[(L-Valylamino)oxy]succinic acid	[M+Na]+	C9H16N2O6		85.5										1.32443e+06	1.46368e+06	1.5016e+06	1.13339e+06	2.35063e+06	3.0057e+06	1.04291e+06	2.30459e+06	1.75218e+06	1.7488e+06	1.73625e+06	1.71691e+06	0.00918113	248.101
MP17736	3.4	495.147	(2R,3S,4S,5S)-4-hydroxy-2,5-bis(hydroxymethyl)-5-{[(2R,3R,4S,5S,6R)-3,4,5-trihydroxy-6-(hydroxymethyl)oxan-2-yl]oxy}oxolan-3-yl (2E)-3-phenylprop-2-enoate	[M+H]+	C21H28O12		85.5										191742	350275	184538	266266	526411	432753	149780	2.23451e+06	744672	826683	825599	793781	0.0482591	472.158
MP4686	5.086	172.169	(2r)-1-[(2s)-piperidin-2-yl]pentan-2-ol	[M+H]+	C10H21NO	UNJGJWVJJMZDOT-VHSXEESVSA-N	85.5			Organoheterocyclic compounds	Piperidines						4.29418e+06	2.47364e+06	7.01664e+06	5.43653e+06	5.55792e+06	5.60619e+06	5.1178e+06	5.13617e+06	4.94109e+06	4.94112e+06	4.92321e+06	4.94109e+06	0.00181213	171.162
MP13272	3.423	371.226	PEG n8	[M+H]+	C16H34O9	GLZWNFNQMJAZGY-UHFFFAOYSA-N	85.5			Organic oxygen compounds	Organooxygen compounds	Ethers					5.3848e+06	9.59185e+06	6.94599e+06	5.76101e+06	9.19257e+06	1.0039e+07	4.04267e+06	6.21864e+06	7.13823e+06	7.21104e+06	7.19034e+06	7.22783e+06	0.00540913	370.22
MP4854	3.563	176.07	4-methoxy-2H-isoquinolin-1-one	[M+H]+	C10H9NO2	ITVVDKFBWYVGPV-UHFFFAOYSA-N	85.4			Organoheterocyclic compounds	Isoquinolines and derivatives	Isoquinolones and derivatives					592855	4.96865e+06	1.04377e+06	1.16033e+06	2.98143e+06	1.78594e+06	646113	3.16608e+06	2.02372e+06	2.06491e+06	2.0203e+06	2.0288e+06	0.0101328	175.063
MP10473	3.983	300.144	Saxitoxin	[M+NH4]+	C10H17N7O4	RPQXVSUAYFXFJA-UHFFFAOYSA-N	85.4	HMDB0029368	C13757	Phenylpropanoids and polyketides	Saxitoxins, gonyautoxins, and derivatives						2.2904e+06	2.20567e+06	2.0705e+06	2.21998e+06	2.46896e+06	2.37912e+06	2.51618e+06	2.44963e+06	2.31079e+06	2.29297e+06	2.27498e+06	2.31061e+06	0.00743909	299.134
MP11100	5.327	316.107	Flusilazole	[M+H]+	C16H15F2N3Si	FQKUGOMFVDPBIZ-UHFFFAOYSA-N	85.4	HMDB0039815	C18733	Benzenoids	Benzene and substituted derivatives	Halobenzenes					403948	396502	299287	414826	351643	1.97597e+06	974971	1.53515e+06	767997	739493	768089	768073	0.0187669	315.1
MP8999	5.084	266.153	3-(4-methylphenyl)-n-(2-phenylethyl)prop-2-enimidic acid	[M+H]+	C18H19NO	CEGXCAVMQDPDRL-UHFFFAOYSA-N	85.4			Phenylpropanoids and polyketides	Cinnamic acids and derivatives	Cinnamic acid amides					2.30837e+06	3.40326e+06	5.51601e+06	2.86503e+06	7.22819e+06	3.12563e+06	3.48175e+06	3.53749e+06	4.0049e+06	3.97403e+06	3.9567e+06	3.95687e+06	0.00571103	265.147
MP16620	4.346	465.22	Cinobufagin	[M+Na]+	C26H34O6	SCULJPGYOQQXTK-UHFFFAOYNA-N	85.3	HMDB0250266	C16931	Lipids and lipid-like molecules	Steroids and steroid derivatives	Steroid lactones	Steroids	24-Carbon atoms	Bufanolide derivatives		9.54948e+06	1.3799e+07	1.02272e+07	7.27885e+06	1.32717e+06	968140	993837	1.19142e+06	6.41022e+06	6.35351e+06	6.27676e+06	6.17705e+06	0.016018	442.236
MP14969	4.164	419.26	11-dodecyl-11h-5,10-dioxatetraphen-12-one	[M+H]+	C28H34O3	VZXAIRMXVWXOBQ-UHFFFAOYSA-N	85.3			Phenylpropanoids and polyketides	Flavonoids	Pyranoflavonoids					1.97195e+07	3.0791e+07	3.73065e+07	2.99538e+07	3.01602e+06	2.06792e+06	3.38421e+06	2.61521e+06	1.75431e+07	1.71623e+07	1.71616e+07	1.72781e+07	0.0104001	418.251
MP2497	0.661	121.039	3-(Difluoromethoxy)-2-pyridinamine	[M+H-H2O]+	C6H6F2N2O		85.3										1.56754e+06	2.2092e+06	2.83983e+06	1.79083e+06	147824	780318	37782.1	36436.8	1.20783e+06	1.25534e+06	1.23581e+06	1.11252e+06	0.0526366	160.045
MP16053	3.999	449.271	7-Hydroxycoumarinyl arachidonate	[2M+Na]+	C29H36O4	SFTGFGOBCQCZDY-DOFZRALJSA-N	85.3										6.48374e+06	1.08504e+07	1.21158e+07	9.69361e+06	1.11642e+06	716332	1.25744e+06	956329	5.6304e+06	5.63086e+06	5.52897e+06	5.58163e+06	0.00867421	448.261
MP8010	3.313	244.115	4-(9H-fluoren-9-yl)pyridine	[M+Na]+	C18H13N	QZQYNZZUBLVQAM-UHFFFAOYSA-N	85.2										1.79716e+06	3.36068e+06	4.26326e+06	4.70353e+06	865792	216364	313272	136799	1.7811e+06	1.86114e+06	1.84956e+06	1.86093e+06	0.0209113	243.105
MP6354	2.643	208.133	2-morpholino-1-phenyl-1-ethanol	[M+H]+	C12H17NO2	CKCUWHAMJDWXOH-UHFFFAOYSA-N	85.2			Organic nitrogen compounds	Organonitrogen compounds	Amines					9.32535e+06	1.38532e+07	1.83233e+07	1.73631e+07	1.72383e+07	1.09365e+07	9.0793e+06	6.87179e+06	1.29716e+07	1.2927e+07	1.29341e+07	1.27762e+07	0.00668517	207.126
MP13550	3.251	379.193	N-({(2R,4S,5R)-5-[3-(4-Fluorophenyl)-1-methyl-1H-pyrazol-5-yl]-1-azabicyclo[2.2.2]oct-2-yl}methyl)acetamide	[M+Na]+	C20H25FN4O		85.2										5.29556e+06	4.73257e+06	5.52057e+06	3.58371e+06	2.0166e+06	2.60578e+06	1.64519e+06	1.39221e+06	3.35666e+06	3.57239e+06	3.27611e+06	3.39867e+06	0.0367807	356.201
MP15439	4.391	432.256	Aspochalasin V	[M+H]+	C25H37NO3S	SKBNNAZECLMWGM-NQSJPESDSA-N	85.2			Alkaloids and derivatives	Cytochalasans	Aspochalasins					9.07202e+06	1.24963e+07	1.47506e+07	1.08175e+07	1.39206e+06	889939	1.02831e+06	1.07484e+06	6.81891e+06	6.85128e+06	6.67802e+06	6.85114e+06	0.012151	431.249
MP16079	4.064	450.22	N-Benzyl-N-methyl-2-[(3R,4S)-3-({5-[(phenylsulfanyl)methyl]-1,2-oxazol-3-yl}methyl)-4-piperidinyl]acetamide	[M+ACN+H]+	C26H31N3O2S		85.2										5.90099e+06	1.04949e+07	1.03042e+07	7.80035e+06	868410	604949	797613	762959	5.04674e+06	5.17861e+06	5.02438e+06	5.02436e+06	0.0146281	449.214
MP9126	4.74	268.263	(R)-7-((3R,5S,7Ar)-5-Propyl-Hexahydro-Pyrrolizin-3-Yl)-Heptan-2-Ol	[M+H]+	C17H33NO	JLXFCRGBJHNVNU-YYIAUSFCSA-N	85.2			Organoheterocyclic compounds	Pyrrolizidines						997157	500362	578615	409037	330688	2.3124e+07	1.7174e+07	2.30303e+07	8.85203e+06	8.76868e+06	8.65776e+06	8.65682e+06	0.0108424	267.256
MP7424	3.059	231.12	(6S)-6-[(1S,2R)-1,2-dihydroxypentyl]-4-methoxy-5,6-dihydro-2H-pyran-2-one	[M+ACN+H]+	C11H18O5	YLHOHANRUSKHKO-YWVKMMECSA-N	85.2			Organoheterocyclic compounds	Pyrans	Pyranones and derivatives					534809	1.08933e+06	1.49788e+06	1.47802e+06	138946	73685.2	171855	115380	557552	583507	583486	583415	0.0224587	230.115
MP13368	4.711	374.114	Deferasirox	[M+H]+	C21H15N3O4	BOFQWVMAQOTZIW-UHFFFAOYSA-N	85.1	HMDB0015547		Organoheterocyclic compounds	Azoles	Triazoles					579413	1.11124e+06	1.6495e+06	1.74591e+06	1.75272e+06	1.40411e+06	834462	667845	1.57788e+06	1.53569e+06	1.30225e+06	1.5783e+06	0.0883354	373.106
MP3513	4.068	146.06	7-Formylindole	[M+H]+	C9H7NO	XQVZDADGTFJAFM-UHFFFAOYSA-N	85.1			Organoheterocyclic compounds	Indoles and derivatives	Indoles					1.59841e+06	218782	231186	95609.7	113656	123038	158790	150369	342519	329031	336706	332987	0.0171097	145.053
MP13678	5.991	383.203	N-(1-Amino-3,3-dimethyl-1-oxo-2-butanyl)-1-(5-hydroxypentyl)-1H-indazole-3-carboxamide	[M+Na]+	C19H28N4O3		85.1										1.95068e+07	1.41708e+07	8.07773e+06	8.35973e+06	2.14045e+07	1.41523e+07	1.30707e+07	1.21439e+07	1.13025e+07	1.13036e+07	1.10806e+07	1.10788e+07	0.0115257	360.216
MP26387	5.429	723.485	Tetrahydrocorticosterone	[M+Na]+	C21H34O4	RHQQHZQUAMFINJ-DTDWNVJFSA-N	85.1	HMDB0000268	C05476	Lipids and lipid-like molecules	Steroids and steroid derivatives	Hydroxysteroids	Lipids	ST Sterol lipids	ST02 Steroids		5.46102e+07	6.85823e+07	6.9968e+07	4.86964e+07	1.05981e+07	6.26628e+06	9.51365e+06	1.00084e+07	3.77243e+07	4.06362e+07	3.77167e+07	3.83154e+07	0.0359439	350.246
MP13907	5.003	390.127	6-Chloro-3-(3,4-dimethoxyphenyl)-2-methyl-4-phenylquinoline	[M+CH3OH+H]+	C24H20ClNO2	FVVURMPCGUWQAJ-UHFFFAOYSA-N	85.1										2.09734e+07	1.76381e+07	5.0171e+07	4.51171e+07	2.0504e+07	2.54024e+07	1.84758e+07	9.5969e+06	3.04879e+07	3.05314e+07	2.71082e+07	3.00985e+07	0.055613	389.118
MP20473	3.623	564.357	PEG n12	[M+NH4]+	C24H50O13	WRZXKWFJEFFURH-UHFFFAOYSA-N	85.1			Organic oxygen compounds	Organooxygen compounds	Ethers					1.38911e+07	1.78686e+07	1.72354e+07	1.27442e+07	1.52789e+07	1.17941e+07	6.3133e+06	1.02314e+07	1.28525e+07	1.28528e+07	1.27979e+07	1.2631e+07	0.0082076	546.325
MP6064	3.279	202.044	Thiabendazole	[M+H]+	C10H7N3S	WJCNZQLZVWNLKY-UHFFFAOYSA-N	85.1	HMDB0014868	C07131	Organoheterocyclic compounds	Benzimidazoles						1.33783e+07	1.45173e+07	6.26236e+06	8.88664e+06	1.25594e+07	1.14408e+07	1.03128e+07	1.89206e+07	1.32156e+07	1.47816e+07	1.10828e+07	1.47646e+07	0.129808	201.036
MP22010	5.129	605.386	5-androstane-3,11,17-trione	[M+Na]+	C19H26O3		85.1										8.914e+06	2.3132e+07	2.46441e+07	1.42825e+07	2.78403e+06	1.74099e+06	2.49754e+06	2.30902e+06	1.20391e+07	1.21083e+07	1.13633e+07	1.21169e+07	0.030575	302.188
MP16555	6.244	463.302	2-[(1S,4S,5S)-4-{[(Cyclohexylcarbamoyl)amino]methyl}-5-isopropyl-2-methyl-2-cyclohexen-1-yl]-N-(3-pyridinylmethyl)acetamide	[M+Na]+	C26H40N4O2		85.1										3.72574e+06	4.70507e+06	4.19895e+06	3.24205e+06	3.1342e+06	4.84819e+06	6.17169e+06	8.18811e+06	4.61255e+06	4.66734e+06	4.79121e+06	4.61079e+06	0.0181281	440.315
MP8061	3.409	245.135	Peganidine	[M+H]+	C14H16N2O2	XCVYWXLCLJENRL-UHFFFAOYSA-N	85			Organoheterocyclic compounds	Diazanaphthalenes	Benzodiazines					1.4905e+07	1.88258e+07	1.84043e+07	1.89953e+07	8.46457e+06	8.75235e+06	8.75061e+06	9.57273e+06	1.07295e+07	1.07295e+07	1.07294e+07	1.09087e+07	0.00831643	244.121
MP20271	6.529	559.287	6-benzyl-1,4,7,10,13-pentahydroxy-12-(hydroxymethyl)-9-isopropyl-15-methyl-3h,6h,9h,12h,15h,18h,19h,20h,20ah-pyrrolo[1,2-a]1,4,7,10,13,16-hexaazacyclooctadecan-16-one	[M+H]+	C27H38N6O7	NTRKFALVAIXZGY-UHFFFAOYSA-N	85			Organic acids and derivatives	Carboxylic acids and derivatives	Amino acids, peptides, and analogues					4813.35	588538	4431.37	2828.01	435699	570767	295807	327218	218409	8643.96	503197	27739.6	1.2115	558.28
MP11297	5.617	320.258	17-Methyl-androstan-3-hydroxyimine-17-ol	[M+Na]+	C20H33NO2	OZDYENBGCZIXOP-ZYWZIWGGSA-N	85			Lipids and lipid-like molecules	Steroids and steroid derivatives	Androstane steroids					858217	824274	1.28258e+06	1.95644e+06	1.94847e+06	1.64751e+06	1.26053e+06	2.4375e+06	1.38192e+06	1.36591e+06	1.38226e+06	1.35078e+06	0.0109737	319.251
MP25756	3.894	707.39	Hirsutatin B	[M+H]+	C35H54N4O11	ZYONQIAFAWQOOQ-UHFFFAOYSA-N	85			Lipids and lipid-like molecules	Prenol lipids	Sesterterpenoids					1.47597e+06	997556	629704	390307	399271	510779	287321	427102	36852.8	400709	401409	398436	0.587261	706.379
MP8511	6.063	255.242	piperazirum	[M+H]+	C15H30N2O	GHNFQFAWPOCNIL-UHFFFAOYSA-N	85			Organic acids and derivatives	Carboxylic acids and derivatives	Amino acids, peptides, and analogues					3.85485e+07	3.64217e+07	3.35624e+07	3.84299e+07	4.52747e+07	6.45986e+07	4.02318e+07	5.53426e+07	4.13565e+07	4.13597e+07	4.1761e+07	4.33722e+07	0.0228512	254.236
MP4465	0.748	167.092	4-Tert-Butylbenzenethiol	[M+H]+	C10H14S	GNXBFFHXJDZGEK-UHFFFAOYSA-N	85			Benzenoids	Benzene and substituted derivatives	Phenylpropanes					7.21168e+06	867191	219387	319921	189928	201914	171028	228320	1.11081e+06	1.11083e+06	1.11074e+06	1.06832e+06	0.0193011	166.082
MP11958	5.075	337.134	N-[4-(aminosulfonyl)phenyl]-3-(tert-butyl)-1-methyl-1H-pyrazole-5-carboxamide	[M+H]+	C15H20N4O3S		85										394018	103377	2.21305e+06	14268.2	21203.3	463056	1.5274e+07	6.13007e+06	48393.9	42659.8	54481.6	30929.5	0.227335	336.126
MP13411	4.146	375.234	(2S,5aS,8aR)-2-{3-[(2R)-2-(Methoxymethyl)-1-pyrrolidinyl]-3-oxopropyl}-1,6-dimethyloctahydropyrrolo[3,2-E][1,4]diazepin-5(2H)-one	[M+Na]+	C18H32N4O3		85										6.50212e+07	1.02771e+08	1.25997e+08	1.07254e+08	8.94926e+06	6.09322e+06	1.0955e+07	7.75174e+06	5.77062e+07	5.68337e+07	5.6758e+07	5.69982e+07	0.00759002	352.247
MP16554	4.177	463.287	9a-{3,4a,5-trimethyl-2-oxo-4h,5h,6h,7h,8h-naphtho[2,3-b]furan-9a-yl}-3,4a,5-trimethyl-4h,5h,6h,7h,8h-naphtho[2,3-b]furan-2-one	[M+H]+	C30H38O4	JGMHMAPGPXLDQW-UHFFFAOYSA-N	85			Lipids and lipid-like molecules	Prenol lipids	Terpene lactones					1.41445e+07	2.21162e+07	2.49458e+07	1.88749e+07	2.33649e+06	1.46601e+06	2.77188e+06	1.93178e+06	1.20777e+07	1.19727e+07	1.1772e+07	1.18668e+07	0.0110804	462.277
MP4905	5.45	177.127	Sedanolide	[M+CH3OH+H]+	C12H18O2	UPJFTVFLSIQQAV-KOLCDFICSA-N	84.9	HMDB0034450	C17002	Organoheterocyclic compounds	Isobenzofurans						1.69806e+06	1.70443e+06	1.48719e+06	1.60185e+06	1.54285e+06	1.73705e+06	1.70517e+06	1.8792e+06	1.71195e+06	1.68715e+06	1.68716e+06	1.69911e+06	0.00697387	194.131
MP11520	3.665	326.174	(9s)-4,16-dimethoxy-10,15-dimethyl-10-azatetracyclo[7.7.1.0,.0,]heptadeca-1(16),2(7),3,5,13(17),14-hexaen-5-ol	[M+H]+	C20H23NO3		84.9										5.26248e+06	8.8853e+06	9.27823e+06	1.02717e+07	8.27992e+06	8.70664e+06	7.09942e+06	7.56928e+06	8.15206e+06	8.19988e+06	8.18996e+06	8.15239e+06	0.00305592	325.168
MP9148	4.834	269.099	3-(3-hydroxy-2,4,5,6-tetramethoxyphenyl)prop-2-enal	[M+H]+	C13H16O6	NYZCSOGYWISDAF-UHFFFAOYSA-N	84.9			Benzenoids	Phenols	Methoxyphenols					243646	114741	203607	298307	252468	1.50815e+06	703839	120285	204206	200205	186864	196718	0.0376471	268.095
MP3948	3.197	155.154	(3-exo)-9-Methyl-9-azabicyclo[3.3.1]nonan-3-amine	[M+NH4]+	C9H18N2		84.9										3.10919e+06	3.68267e+06	2.36586e+06	4.30717e+06	2.54817e+06	393731	707114	523143	2.13493e+06	2.13473e+06	2.13494e+06	2.0701e+06	0.0152838	154.147
MP5599	4.335	192.102	7,8-dimethoxy-1,3-dihydro-3-benzazepin-2-one	[M+ACN+H]+	C12H13NO3	CPNZASIAJKSBBH-UHFFFAOYSA-N	84.9			Organoheterocyclic compounds	Benzazepines						5.81014e+06	5.90592e+06	6.63034e+06	6.71588e+06	4.30367e+06	8.10703e+06	7.21119e+06	5.282e+06	6.3337e+06	6.33392e+06	6.3334e+06	6.54218e+06	0.0163256	219.09
MP5233	2.073	184.169	N-Cyclohexyl-3-methylbutanamide	[M+H]+	C11H21NO	KDOWYZAXEZQVBH-UHFFFAOYSA-N	84.9			Lipids and lipid-like molecules	Fatty Acyls	Fatty amides					1.20196e+06	1.5493e+06	1.74975e+06	1.71946e+06	1.26864e+06	1.74637e+06	1.3556e+06	2.58284e+06	1.57732e+06	1.57737e+06	1.55253e+06	1.57742e+06	0.00790304	183.162
MP11961	4.633	337.197	5-Methoxy-2-[(3S)-1-(1-methyl-4-piperidinyl)-3-pyrrolidinyl]-1H-benzimidazole	[M+H-H2O]+	C18H26N4O		84.9										2.28729e+07	1.77163e+07	1.57059e+07	1.34039e+07	1.9469e+07	2.20987e+07	1.43031e+07	2.54115e+07	2.0378e+07	1.93012e+07	1.92922e+07	1.97303e+07	0.0259756	314.211
MP6616	3.475	214.062	carbanolate	[M+H]+	C10H12ClNO2	FNAAOMSRAVKQGQ-UHFFFAOYSA-N	84.9		C18950								1.27773e+06	850981	809013	837821	649325	856554	804354	846259	861219	820084	829645	809027	0.0270566	213.056
MP13343	5.015	373.198	(5S,6R,7E,9E,11Z,13E,15S,17Z)-5,6,15-Trihydroxy-7,9,11,13,17-icosapentaenoic acid	[M+ACN+H]+	C20H30O5		84.8										1.47258e+06	479424	1.93104e+06	893189	1.2797e+06	72278.3	79752.2	887221	964428	991099	806389	935812	0.0885621	350.209
MP7337	4.787	229.136	N-Cyclohexyl-4-thiomorpholinecarboxamide	[M+H]+	C11H20N2OS		84.8										209004	53105.6	367279	265983	8.99298e+06	1.78733e+06	620304	315194	3.00309e+06	2.82522e+06	2.82262e+06	2.88389e+06	0.0292915	228.13
MP11781	4.93	333.205	9,16-dihydroxy-6-(hydroxymethyl)-2,6,11-trimethyl-15-oxatetracyclo[8.7.0.0,.0a,a]heptadec-12-en-14-one	[2M+Na]+	C20H30O5		84.8										2.89575e+06	1.97236e+06	2.90361e+06	1.45934e+06	1.5749e+06	1.57816e+06	1.31081e+06	1.25273e+06	1.82243e+06	1.86367e+06	1.82156e+06	1.83797e+06	0.0107138	350.209
MP13990	3.911	392.178	(S)-methyl 2-(2-(3-isopropyl-4-oxo-3,4-dihydrophthalazin-1-yl)acetamido)-4-(methylthio)butanoate	[M+H]+	C19H25N3O4S	QNFJJLVWQARXHY-HNNXBMFYSA-N	84.8			Organic acids and derivatives	Carboxylic acids and derivatives	Amino acids, peptides, and analogues					2.37407e+06	3.98996e+06	4.18878e+06	3.44713e+06	359194	208745	2.18413e+06	257629	2.06422e+06	2.19755e+06	2.12684e+06	2.12198e+06	0.0256604	391.157
MP15482	4.375	433.276	Aspochalazine A	[M+H]+	C24H36N2O5	KIBZWQUXTPVHRM-UHFFFAOYSA-N	84.8			Organoheterocyclic compounds	Quinolines and derivatives	Benzoquinolines					5.09622e+07	7.45637e+07	8.29088e+07	6.3448e+07	7.46382e+06	5.04061e+06	6.82223e+06	6.6328e+06	4.06541e+07	4.05533e+07	4.03582e+07	4.072e+07	0.00388938	432.262
MP1107	7.549	88.0755	Morpholine	[M+H]+	C4H9NO	YNAVUWVOSKDBBP-UHFFFAOYSA-N	84.8	HMDB0031581	C14452	Organoheterocyclic compounds	Oxazinanes	Morpholines					8.89313e+06	5.24085e+06	1.0241e+07	9.14763e+06	1.28715e+07	1.20216e+07	7.60385e+06	7.06215e+06	1.06909e+07	6.04557e+06	1.07524e+07	1.06004e+07	0.243499	87.0684
MP8707	3.556	259.115	4-Benzoylbiphenyl	[M+H]+	C19H14O	LYXOWKPVTCPORE-UHFFFAOYSA-N	84.8			Benzenoids	Benzene and substituted derivatives	Benzophenones					3.30814e+06	1.08505e+07	1.25825e+07	1.51222e+07	1.32529e+06	52433.7	107772	39905.3	5.33139e+06	5.849e+06	5.84978e+06	5.7137e+06	0.0430688	258.104
MP22081	5.025	607.401	Vildagliptin	[M+Na]+	C17H25N3O2	SYOKIDBDQMKNDQ-XWTIBIIYSA-N	84.8	HMDB0015596		Organic acids and derivatives	Carboxylic acids and derivatives	Amino acids, peptides, and analogues					5.95331e+07	7.60585e+07	7.83083e+07	5.5395e+07	1.13449e+07	8.1636e+06	1.19359e+07	1.0226e+07	4.53695e+07	4.53672e+07	4.41205e+07	4.51869e+07	0.0133261	303.195
MP17207	3.536	481.261	asprellol B	[M+H]+	C29H36O6	TVKPLQPCPKPRMS-DNXUOPEWSA-N	84.8			Organoheterocyclic compounds	Lactones	Gamma butyrolactones					3.98053e+06	6.23835e+06	4.83521e+06	3.8715e+06	5.36134e+06	4.71458e+06	2.43174e+06	4.04133e+06	4.49849e+06	4.51138e+06	4.4346e+06	4.51126e+06	0.00818034	480.251
MP11057	4.446	315.133	2-[(3S)-1-(3,4-Difluorobenzyl)-3-pyrrolidinyl]-1,3-benzoxazole	[M+ACN+H]+	C18H16F2N2O		84.8										949708	28234.2	155714	340855	7678.5	775286	295780	5744.91	70224.9	125772	21604	217168	0.771998	314.123
MP5379	4.782	187.126	naphtylethylenediamine	[M+H]+	C12H14N2		84.8										18204.7	5.14731e+06	2.82832e+06	2.51202e+06	2.94383e+06	1.06297e+06	570189	388715	1.92932e+06	1.82183e+06	1.75937e+06	1.84704e+06	0.0382596	186.116
MP14834	5.257	415.21	Bis(4-ethylbenzylidene)sorbitol	[2M+H]+	C24H30O6	RPMMDFYGVMKCJU-UHFFFAOYSA-N	84.8										4.0579e+07	2.79252e+07	2.84883e+07	2.98082e+07	4.45527e+07	1.63579e+07	1.93469e+07	1.43013e+07	2.74895e+07	2.70232e+07	2.73122e+07	2.74824e+07	0.00799171	414.204
MP7330	3.564	229.104	Chrysen	[M+H]+	C18H12	WDECIBYCCFPHNR-UHFFFAOYSA-N	84.7	HMDB0250216	C14222	Benzenoids	Phenanthrenes and derivatives	Chrysenes					2.93286e+06	1.14418e+07	1.21879e+07	1.1857e+07	1.50374e+06	659902	590534	541815	4.87357e+06	5.17388e+06	5.1726e+06	5.02095e+06	0.0283927	228.094
MP6514	4.269	212.164	1-(Cyclohexylmethyl)proline	[M+ACN+H]+	C12H21NO2		84.7										1.87027e+06	2.43492e+06	2.37356e+06	5.30052e+06	3.65671e+06	5.34094e+06	1.9171e+06	6.91269e+06	4.18195e+06	4.18169e+06	4.08082e+06	4.18219e+06	0.0121642	211.157
MP4464	0.609	167.073	3-PHENYLLACTIC ACID	[M+H]+	C9H10O3	VOXXWSYKYCBWHO-UHFFFAOYAI	84.7	HMDB0000563	C05607	Phenylpropanoids and polyketides	Phenylpropanoic acids						6.80098e+06	1.53531e+07	1.40471e+07	1.02246e+07	1.89632e+07	1.56709e+07	8.87092e+06	1.58754e+07	1.34843e+07	1.36502e+07	1.33735e+07	1.38346e+07	0.0148106	166.063
MP17264	4.397	483.219	Marchantin A Trimethyl Ether	[M+H]+	C31H30O5	JNMUZWBJUZBJLP-UHFFFAOYSA-N	84.7			Lignans, neolignans and related compounds							419252	934194	2.15489e+06	2.72262e+06	592348	1.10778e+06	3.32055e+06	742983	2.26477e+06	2.06644e+06	2.00044e+06	2.01547e+06	0.0584506	482.209
MP4731	1.219	173.078	C4-Carnitine	[M+Na]+	C11H21NO4		84.7										1.56944e+07	1.63891e+07	2.23333e+07	2.42555e+07	2.00317e+07	2.24601e+07	1.87295e+07	2.05145e+07	1.9448e+07	1.94948e+07	1.8632e+07	1.9322e+07	0.0208837	231.147
MP6986	7.4	222.112	Carbofuran	[M+H]+	C12H15NO3	DUEPRVBVGDRKAG-UHFFFAOYSA-N	84.7	HMDB0031770	C14291	Organoheterocyclic compounds	Coumarans						6.44699e+06	6.94621e+06	6.47114e+06	7.20937e+06	5.24142e+06	5.5044e+06	6.54828e+06	7.1541e+06	5.97586e+06	6.4846e+06	6.08685e+06	6.41069e+06	0.0394956	221.105
MP6665	3.282	215.089	Decarestrictine Q	[M+H]+	C10H14O5	XYYQZZPYSCAOGY-OTKUIEDOSA-N	84.6			Organoheterocyclic compounds	Lactones						1.41384e+06	3.33733e+06	1.04794e+07	4.52271e+06	482042	122563	310416	123526	1.85704e+06	2.30535e+06	1.69405e+06	1.67778e+06	0.155352	214.084
MP8997	3.594	266.128	7-Aminonimetazepam	[M+H]+	C16H15N3O	OALPQSAJOMDTDB-UHFFFAOYSA-N	84.6			Organoheterocyclic compounds	Benzodiazepines	1,4-benzodiazepines					160917	79240.9	309152	865938	236701	927084	306589	232701	365031	365105	357598	357693	0.0118603	265.122
MP8059	4.481	245.131	Cyclo(phenylalanyl-prolyl)	[M+H]+	C14H16N2O2	QZBUWPVZSXDWSB-UHFFFAOYNA-N	84.6	HMDB0250631		Organic acids and derivatives	Carboxylic acids and derivatives	Amino acids, peptides, and analogues					1.42719e+06	667475	611952	1.21272e+06	2.28368e+06	529055	456577	309412	524111	524153	518621	502960	0.0193455	244.121
MP11061	3.937	315.177	Lotusine	[M+H]+	C19H24NO3	ZKTMLINFIQCERN-QGZVFWFLSA-O	84.6	HMDB0033347	C17567	Organoheterocyclic compounds	Isoquinolines and derivatives	Benzylisoquinolines					4.29596e+06	2.02127e+07	2.78536e+07	1.68582e+07	2.4863e+06	1.22857e+06	1.71016e+06	1.26569e+06	9.79851e+06	1.00757e+07	9.67191e+06	9.76121e+06	0.0177294	314.176
MP13341	4.655	373.183	Heroin-d3	[2M+Na]+	C21H202H3NO5		84.5										245754	1.24465e+06	3.46245e+06	1.79689e+06	100779	19265.9	109773	769686	423575	420270	565705	573152	0.171942	552.582
MP10396	5.727	298.31	Tridemorph	[M+H]+	C19H39NO	YTOPFCCWCSOHFV-UHFFFAOYSA-N	84.5	HMDB0031810	C11285	Organoheterocyclic compounds	Oxazinanes	Morpholines					2.52405e+06	3.47135e+06	1.52682e+06	2.69676e+06	2.38681e+06	2.63868e+06	2.58019e+06	3.69087e+06	2.38488e+06	2.62148e+06	2.61821e+06	2.61967e+06	0.0458644	297.303
MP6507	4.623	212.107	2-Methoxy-3-methylcarbazole	[M+H]+	C14H13NO	XYYYPIAQQFQTAN-UHFFFAOYSA-N	84.5	HMDB0033456		Organoheterocyclic compounds	Indoles and derivatives	Carbazoles					496883	869452	569119	937241	1.00591e+06	775151	654751	658584	859544	847036	808292	855166	0.0277658	211.1
MP15109	5.277	423.198	N2-{[(3R,4S)-3-{[5-(4-methoxyphenyl)-1,2-oxazol-3-yl]methyl}-4-piperidinyl]acetyl}-N2-methylglycinamide	[M+Na]+	C21H28N4O4		84.5										680632	372479	113809	64822.8	1.40937e+06	199644	198334	1.1854e+06	391158	341585	331091	356707	0.0738195	400.211
MP10117	2.915	291.141	Altertoxin IX	[M+H]+	C20H18O2	GVTNCLLILDBBLI-QGZVFWFLSA-N	84.5			Benzenoids	Phenanthrenes and derivatives	Phenanthrols					1.52824e+06	1.54502e+06	1.6753e+06	1.06914e+06	642778	978843	552189	550236	1.10257e+06	1.06132e+06	1.03643e+06	1.04935e+06	0.0269509	290.131
MP15626	5.36	437.192	Ligulacephalin A	[M+H]+	C26H28O6	FOBOWKZGEOSKGQ-CLJLJLNGSA-N	84.5			Organoheterocyclic compounds	Benzofurans						2.87914e+07	1.36526e+07	1.45337e+07	1.30214e+07	2.18469e+07	8.41675e+06	9.69097e+06	7.49671e+06	1.48953e+07	1.83666e+07	1.2368e+07	1.41948e+07	0.16788	436.189
MP5691	3.181	194.092	N'-Propionyl-2-pyridinecarbohydrazide	[M+NH4]+	C9H11N3O2		84.5										4.41332e+06	7.01709e+06	8.63945e+06	6.49583e+06	568726	421349	493822	350541	3.33062e+06	3.39053e+06	3.39069e+06	3.34746e+06	0.00908144	193.085
MP17366	3.035	485.357	Fluvirucin B6	[M+H]+	C26H48N2O6	WEVZGKSDDNCUFL-WOTYRYJGSA-N	84.4			Organic oxygen compounds	Organooxygen compounds	Carbohydrates and carbohydrate conjugates					1.25846e+07	1.48005e+07	1.45981e+07	1.53595e+07	1.28133e+07	1.41332e+07	1.31721e+07	1.83579e+07	1.37097e+07	1.35727e+07	1.37113e+07	1.32088e+07	0.0174861	484.351
MP13481	4.635	377.192	3-methoxy-6,9,10-trimethyl-5-oxo-4,14-dioxatetracyclo[7.5.0.0,.0,]tetradec-6-en-8-yl 2-methylbut-2-enoate	[M+H]+	C21H28O6		84.4										2.01267e+06	5.73265e+06	2.3767e+06	1.83298e+06	7.15607e+06	4.17372e+06	3.54834e+06	4.6757e+06	5.4579e+06	4.85638e+06	4.6963e+06	4.72344e+06	0.0722665	376.189
MP30545	5.537	869.58	Tilmicosin	[M+H-H2O]+	C46H80N2O13	JTSDBFGMPLKDCD-UHFFFAOYSA-N	84.4	HMDB0259095		Organic oxygen compounds	Organooxygen compounds	Carbohydrates and carbohydrate conjugates					210233	279022	273254	174009	14370.1	19285.5	3039.6	1878.44	3228.49	2457.08	57803.1	5243.64	1.57745	868.566
MP6009	3.205	201.109	L-Hexanoylcarnitine	[M+Na]+	C13H25NO4	VVPRQWTYSNDTEA-LLVKDONJSA-N	84.4	HMDB0000756		Lipids and lipid-like molecules	Fatty Acyls	Fatty acid esters					7.28044e+06	1.35624e+07	1.52887e+07	1.48703e+07	2.62371e+06	2.98758e+06	3.25151e+06	2.87511e+06	6.77334e+06	6.97894e+06	6.11996e+06	6.97853e+06	0.0606084	259.178
MP13256	5.675	371.116	6,8-O-dimethylbipolarin	[M+H]+	C20H18O7	DYLGONPGIPBLPT-ZDUSSCGKSA-N	84.4			Benzenoids	Anthracenes	Anthraquinones					413178	419024	9.29369e+06	420417	2.02354e+07	1.76772e+07	3.50768e+06	1.12715e+07	7.33541e+06	7.34115e+06	7.08774e+06	6.68707e+06	0.0432242	370.105
MP8599	3.464	257.099	Ethyl 2-amino-5-(dimethylcarbamoyl)-4-methyl-3-thiophenecarboxylate	[M+Na]+	C11H16N2O3S	VOFMVGKEJXTNCQ-UHFFFAOYSA-N	84.4			Organoheterocyclic compounds	Thiophenes	Aminothiophenes					667398	2.14302e+06	1.70879e+06	1.40224e+06	745955	702905	681995	279364	969540	1.05826e+06	1.05867e+06	1.0265e+06	0.0407854	256.088
MP10676	3.246	305.156	Urechitol B	[M+H]+	C14H24O7	VOXRJYWWINZCOZ-DEHUOKPOSA-N	84.4			Organoheterocyclic compounds	Furopyrans						6.2177e+06	9.43896e+06	7.12646e+06	7.18232e+06	9.0088e+06	1.1095e+07	4.94737e+06	6.42888e+06	7.905e+06	8.06343e+06	7.99387e+06	8.06223e+06	0.00934915	304.152
MP13878	4.222	389.214	7-{[(2E,6E)-3,7,11-trimethyldodeca-2,6,10-trien-1-yl]oxy}chromen-2-one	[M+Na]+	C24H30O3	GNMUGVNEWCZUAA-WOWYBKFKSA-N	84.4			Lipids and lipid-like molecules	Prenol lipids	Terpene lactones					1.72878e+07	3.20859e+07	5.16773e+07	2.37856e+07	2.60077e+06	1.0764e+06	1.80871e+06	1.97681e+06	1.66874e+07	1.67115e+07	1.57962e+07	1.58222e+07	0.0316345	366.219
MP10125	5.515	291.195	Albocyclin	[M+H-H2O]+	C18H28O4	BYWWNDLILWPPJP-UHFFFAOYSA-N	84.4			Phenylpropanoids and polyketides	Macrolides and analogues						1.76304e+07	1.05192e+06	4.48771e+06	3.54058e+06	3.46668e+06	617764	981448	4.80826e+06	4.48474e+06	4.45265e+06	4.37334e+06	4.49195e+06	0.0122027	308.199
MP10336	5.149	297.167	2-hydroxy-14-(methoxymethyl)-5,9-dimethyl-4,12-dioxatricyclo[9.3.0.0,]tetradec-8-en-13-one	[M+H]+	C16H24O5		84.3										716027	488275	1.24274e+06	1.26146e+06	1.62171e+06	2.06087e+06	1.04716e+06	1.49724e+06	1.21598e+06	1.21608e+06	1.17941e+06	1.204e+06	0.014338	296.162
MP11103	3.912	316.172	Lycopsamine N-oxide	[M+H]+	C15H25NO6	DNAWGBOKUFFVMB-FVZLBROTSA-N	84.3			Alkaloids and derivatives							1.33999e+07	2.14657e+07	3.02773e+07	2.84599e+07	2.24933e+06	1.33249e+06	2.22199e+06	1.67215e+06	1.4512e+07	1.47859e+07	1.46591e+07	1.45126e+07	0.00902598	315.168
MP3331	0.702	142.018	(4-Chloro-1H-pyrazol-1-yl)acetonitrile	[M+CH3OH+H]+	C5H4ClN3	ZEFWSTXCHGXTJA-UHFFFAOYSA-N	84.3										1.84068e+06	1.62568e+06	1.51738e+06	2.06339e+06	1.66437e+06	2.25729e+06	1.5244e+06	1.82599e+06	1.68741e+06	1.70403e+06	1.6872e+06	1.74751e+06	0.0166599	141.009
MP12346	5.57	347.219	Tetrahydrocortisone	[M+Na]+	C21H32O5	SYGWGHVTLUBCEM-ZIZPXRJBSA-N	84.3	HMDB0000903	C05470	Lipids and lipid-like molecules	Steroids and steroid derivatives	Hydroxysteroids	Hormones and transmitters	Steroid hormones	Glucocorticoids		4.89972e+06	1.66405e+06	2.66011e+06	2.14034e+06	4.60284e+06	1.49385e+06	1.20422e+06	2.24499e+06	3.04764e+06	3.04603e+06	3.06596e+06	2.1021e+06	0.16894	364.225
MP7970	3.035	243.182	PHENETHYLAMINE	[M+ACN+H]+		BHHGXPLMPWCGHP-UHFFFAOYSA-N	84.3	HMDB0012275	C05332	Benzenoids	Benzene and substituted derivatives	Phenethylamines	Peptides	Amines	Biogenic amines		1.78017e+08	1.93636e+08	1.99835e+08	2.09562e+08	1.73492e+08	2.05044e+08	2.02814e+08	2.90444e+08	1.94229e+08	1.92349e+08	1.90795e+08	1.93273e+08	0.00758813
MP24945	7.025	685.434	Icosalide B	[M+H]+	C34H60N4O10	HZQBTVDHJQJQOP-AVTNHXHSSA-N	84.3			Organic acids and derivatives	Peptidomimetics	Depsipeptides					1.06155e+07	4.36323e+06	3.04596e+06	7.00134e+06	8.78379e+06	7.38256e+06	7.4558e+06	1.07276e+07	7.08449e+06	7.09563e+06	3.05372e+06	8.14097e+06	0.354458	684.431
MP9262	5.879	271.205	Aspewentin A	[M+H]+	C19H26O	XEPZBLVFVODCNB-IBGZPJMESA-N	84.3			Benzenoids	Phenanthrenes and derivatives	Phenanthrols					1.03399e+07	4.55187e+06	8.44063e+06	5.24556e+06	4.94727e+06	570105	708419	2.81642e+06	4.72288e+06	4.77608e+06	4.69956e+06	4.75581e+06	0.00717877	270.198
MP9256	3.888	271.151	Xylaric acid A	[M+H]+	C14H22O5	PIOOXQKLTYQUAP-UHFFFAOYSA-N	84.3			Lipids and lipid-like molecules	Prenol lipids	Monoterpenoids					4.22695e+06	2.00718e+07	2.71986e+07	1.97488e+07	3.81268e+06	2.11036e+06	2.45147e+06	2.21633e+06	1.10016e+07	1.0953e+07	1.09529e+07	1.10274e+07	0.00337236	270.147
MP7808	0.66	240.159	(1r,5r)-6-hydroxy-8-methyl-8-azabicyclo[3.2.1]octan-3-yl (2e)-2-methylbut-2-enoate	[M+H]+	C13H21NO3	AABSYOQYJYBHOJ-IWMMXTRQSA-N	84.2			Alkaloids and derivatives	Tropane alkaloids						564353	536278	575870	818042	717987	794416	708729	648463	663574	692709	663704	666717	0.0209877	239.152
MP10475	5.083	300.18	Lycopsamine	[M+H]+	C15H25NO5	SFVVQRJOGUKCEG-ZGFBFQLVSA-N	84.2	HMDB0301846	C10347	Alkaloids and derivatives			Alkaloids	Alkaloids derived from ornithine	Pyrrolizidine alkaloids		214921	1.06981e+06	258857	152885	6.77143e+06	1.44383e+06	924406	839310	726339	813896	647783	651126	0.110332	299.173
MP4387	7.258	165.113	1-(4,5-dihydro-1H-imidazol-2-yl)-3,5-dimethyl-1H-pyrazole hydrobromide	[M+H]+	C8H12N4		84.2										5.84037e+06	7.8329e+06	7.92017e+06	5.90264e+06	8.6502e+06	8.33629e+06	8.88688e+06	6.58051e+06	9.7355e+06	9.75015e+06	9.75167e+06	6.24787e+06	0.197149	164.106
MP11439	5.915	324.25	7-[2-(3-Hydroxyoctyl)-5-oxo-1-pyrrolidinyl]heptanoic acid	[M+Na]+	C19H35NO4		84.2										5.87904e+06	3.90419e+06	3.96123e+06	5.49899e+06	8.35184e+06	2.36779e+07	1.17332e+07	1.32551e+07	9.47252e+06	9.47491e+06	9.29927e+06	9.08578e+06	0.0197432	341.257
MP9931	3.887	287.146	CYCLOCREATINE	[M+Na]2+	C5H9N3O2	AMHZIUVRYRVYBA-UHFFFAOYSA-N	84.1	HMDB0250642		Organic acids and derivatives	Carboxylic acids and derivatives	Amino acids, peptides, and analogues					1.65896e+07	2.99251e+07	4.83681e+07	3.94833e+07	4.49869e+06	1.8499e+06	3.96896e+06	3.27889e+06	2.02276e+07	2.03885e+07	2.03903e+07	2.02281e+07	0.00459301	143.069
MP5052	4.47	180.174	(1R,3S,5S,7R)-3,5-Dimethyl-1-adamantanamine	[M+H-H2O]+	C12H21N		84.1										181152	258746	275939	5.02435e+06	345901	430660	237626	2.13007e+06	1.1144e+06	1.08382e+06	1.10092e+06	1.09102e+06	0.0120673	179.167
MP9853	0.71	285.069	5-[4-(phenylsulfonyl)phenyl]-1H-pyrazole	[M+CH3OH+H]+	C15H12N2O2S		84.1										2.09045e+06	6.36177e+06	6.49421e+06	3.33102e+06	2.07012e+06	1.09712e+06	3.26592e+06	1.70529e+06	2.93376e+06	2.96736e+06	2.93008e+06	2.93009e+06	0.00615865	284.062
MP7717	4.15	238.141	9-methyl-3-oxa-9-azatricyclo[3.3.1.0,]nonan-7-yl (2e)-2-methylbut-2-enoate	[M+H]+	C13H19NO3		84.1										145923	476762	328483	1.58344e+06	364750	1.31427e+06	470254	2.08368e+06	953360	1.01598e+06	968518	952907	0.0305947	237.136
MP7366	4	230.078	4-morpholinobenzoic acid	[M+CH3OH+H]+	C11H13NO3	XVAJKPNTGSKZSQ-UHFFFAOYSA-N	84.1			Organoheterocyclic compounds	Oxazinanes	Morpholines					103033	1.16308e+06	390878	513421	1.0746e+06	952211	348708	1.49013e+06	1.00489e+06	1.00492e+06	968664	991809	0.01722	207.09
MP12105	5.412	341.156	Neolymphostinol C	[M+H]+	C18H20N4O3	FHIVVNMJMIRBRH-UHFFFAOYSA-N	84.1			Organoheterocyclic compounds	Quinolines and derivatives	Pyrroloquinolines					1.27383e+07	1.58308e+07	7.08833e+06	9.65619e+06	2.12453e+07	1.88389e+07	1.42363e+07	1.24386e+07	1.18382e+07	1.24169e+07	1.15762e+07	1.11906e+07	0.0438082	340.154
MP11562	3.346	327.2	PEG n7	[M+H]+	C14H30O8	XPJRQAIZZQMSCM-UHFFFAOYSA-N	84.1			Organic oxygen compounds	Organooxygen compounds	Ethers					6.73832e+06	1.11972e+07	7.81405e+06	7.05012e+06	1.07133e+07	1.21045e+07	5.26393e+06	6.82744e+06	8.43753e+06	8.65829e+06	8.50456e+06	8.42874e+06	0.0124849	326.194
MP3029	2.762	135.101	Diglyme	[M+H]+	C6H14O3	SBZXBUIDTXKZTM-UHFFFAOYSA-N	84	HMDB0251284		Organic oxygen compounds	Organooxygen compounds	Ethers					1.37827e+06	1.75055e+06	2.6487e+06	4.03906e+06	2.63426e+06	1.57742e+06	2.07625e+06	2.32203e+06	2.19578e+06	2.0639e+06	2.19582e+06	2.19567e+06	0.0304824	134.094
MP5648	4.971	193.122	1,4-dimethoxy-2-methyl-5-(prop-1-en-2-yl)benzene	[M+H]+	C12H16O2	BKYVJXZONZSTIB-UHFFFAOYSA-N	84			Benzenoids	Benzene and substituted derivatives	Methoxybenzenes					817237	1.12025e+06	1.28457e+06	1.10666e+06	1.20108e+06	1.53131e+06	1.08912e+06	1.11157e+06	1.12449e+06	1.15984e+06	1.13375e+06	1.12445e+06	0.0147249	192.115
MP11630	4.193	329.193	(1r,3r,5r,6r,7s,9s,10r,13s)-3,5-dimethoxy-6,9,10-trimethyl-4,14-dioxatetracyclo[7.5.0.0,.0,]tetradecane-6,7-diol	[M+H]+	C17H28O6		84										1.10507e+07	4.21005e+07	5.92187e+07	3.60404e+07	3.66134e+06	2.71081e+06	3.1959e+06	2.92316e+06	2.1229e+07	2.05002e+07	2.05889e+07	2.07051e+07	0.0157276	328.189
MP6135	1.09	203.139	L-Isoleucyl-L-alanine	[2M+Na]+	C9H18N2O3	RCFDOSNHHZGBOY-UHFFFAOYSA-N	84	HMDB0028900		Organic acids and derivatives	Carboxylic acids and derivatives	Amino acids, peptides, and analogues					236607	1.19812e+06	1.39674e+06	832491	832135	848802	801498	1.23986e+06	913958	891654	897890	898258	0.0105589	202.132
MP10607	3.702	303.177	(1S,2S,5S,6S,7R,8S,9R,12R)-2,6,10,10-tetramethyl-11-oxatricyclo[7.2.1.01,6]dodecane-2,5,7,8,12-pentol	[M+H]+	C15H26O6	MWGRRKDIJLJLMO-OSYKULTDSA-N	83.9			Organic oxygen compounds	Organooxygen compounds	Carbohydrates and carbohydrate conjugates					1.40442e+07	2.16608e+07	2.71631e+07	2.48377e+07	1.9802e+06	1.57791e+06	2.63906e+06	1.78543e+06	1.25443e+07	1.24686e+07	1.23899e+07	1.26555e+07	0.00904215	302.173
MP3558	7.334	146.98	1,2-Dichlorobenzene	[M+H]+	C6H4Cl2	RFFLAFLAYFXFSW-UHFFFAOYSA-N	83.9	HMDB0244067	C14328	Benzenoids	Benzene and substituted derivatives	Halobenzenes					7.24647e+06	6.51202e+06	6.51279e+06	8.82472e+06	5.78442e+06	6.96945e+06	1.1066e+07	5.42847e+06	7.77886e+06	8.05364e+06	4.58594e+06	7.79105e+06	0.233846	145.969
MP4294	4.064	163.132	Diethylene glycol monobutyl ether	[M+H]+	C8H18O3	OAYXUHPQHDHDDZ-UHFFFAOYSA-N	83.9	HMDB0244918		Organic oxygen compounds	Organooxygen compounds	Ethers					2.33741e+07	2.37016e+07	2.24196e+07	2.4237e+07	2.51948e+07	2.52999e+07	2.52029e+07	2.54965e+07	2.48081e+07	2.48058e+07	2.46092e+07	2.46146e+07	0.00455825	162.126
MP12752	5.932	357.26	14(S)-HDHA	[M+Na]+	C22H32O3	ZNEBXONKCYFJAF-OUKOMXQNSA-N	83.9			Lipids and lipid-like molecules	Fatty Acyls	Fatty acids and conjugates					4.18338e+06	3.67655e+06	3.32849e+06	3.99764e+06	5.33463e+06	6.00711e+06	4.65529e+06	5.32435e+06	4.52575e+06	4.71591e+06	4.52539e+06	4.52534e+06	0.0208197	344.235
MP10561	5.217	302.12	N()-Z-S-benzyl-L-cysteine	[M+H-H2O]+	C18H19NO4S		83.9										3.46777e+06	3.69846e+06	4.52513e+06	2.91587e+06	7.4884e+06	4.32192e+06	3.57804e+06	4.28863e+06	4.24662e+06	4.20446e+06	4.21342e+06	4.3746e+06	0.0184682	345.103
MP10524	4.564	301.198	(2R,3S,4S,5E,7S)-2-heptyl-3,4,7-trihydroxy-2,3,4,7,8,9-hexahydrooxecin-10-one	[M+H]+	C16H28O5	YZXINJQTAMWFKM-GUWPTFDSSA-N	83.9			Organoheterocyclic compounds	Oxanes						1.42743e+06	1.21593e+06	2.57762e+06	1.12329e+06	6.16998e+06	1.1834e+07	3.44098e+06	7.01998e+06	3.56893e+06	3.71614e+06	3.77846e+06	3.74919e+06	0.0251268	300.194
MP19498	3.473	539.173	4,4',5,5'-tetrahydroxy-2,2'-dimethoxy-7,7'-dimethyl-9h,9'h-[9,9'-bianthracene]-10,10'-dione	[M+H]+	C32H26O8	CZJNLQOXUCEPOH-UHFFFAOYSA-N	83.9			Benzenoids	Anthracenes						90110.9	222040	124773	190368	355412	400502	133702	1.4953e+06	542195	583621	571940	574042	0.031529	538.163
MP20035	3.824	553.33	bisnordihydrotoxyferine	[M+H]+	C38H40N4	XISKMNBBUQQBBE-SWFQZPKUSA-N	83.9			Alkaloids and derivatives	Strychnos alkaloids						2.45741e+07	2.0924e+07	1.64251e+07	6.89093e+06	7.27806e+06	6.69062e+06	5.27018e+06	6.27073e+06	1.18389e+07	1.18793e+07	1.16152e+07	1.18791e+07	0.0107357	552.325
MP9438	3.115	275.11	Xylomollin	[M+H]+	C12H18O7	IYOMTPNHJRSLSB-UHFFFAOYNA-N	83.9										1.48485e+06	2.2197e+06	1.88647e+06	1.62894e+06	4.24922e+06	1.55515e+06	1.04892e+06	3.16464e+06	2.10479e+06	2.24424e+06	2.1052e+06	2.1051e+06	0.0325295	274.105
MP7184	6.151	226.158	Glulisine A	[M+H]+	C11H19N3O2	VBSSYYRKWADWMM-UHFFFAOYSA-N	83.9			Organic acids and derivatives	Carboximidic acids and derivatives	Carboximidic acids					4.08998e+07	1.16016e+08	1.06136e+08	1.14258e+08	9.88496e+07	1.54346e+08	1.14896e+08	1.5573e+08	1.10432e+08	1.10441e+08	1.08262e+08	1.10185e+08	0.00957754	225.148
MP7040	5.771	223.169	(1r,3s,7s,10s)-10,11,11-trimethyl-12-oxatricyclo[5.3.1.1,]dodecan-5-one	[M+H]+	C14H22O2		83.8										319624	272625	276965	358839	310433	451856	81194.2	301757	337408	115537	333603	297736	0.388158	222.162
MP9867	5.374	285.203	Koninginin A	[M+H]+	C16H28O4	GBDGOAVPCDIMFE-UHFFFAOYSA-N	83.8			Organoheterocyclic compounds	Oxepanes						1.26484e+07	1.87135e+07	1.28559e+07	1.56472e+07	2.52211e+07	3.47343e+07	2.485e+07	2.6944e+07	1.97098e+07	1.97985e+07	1.94678e+07	1.94704e+07	0.00859244	284.199
MP16831	7.213	471.236	methyl 2-[(1S,3S,7R,8R,12S,13S)-13-(furan-3-yl)-6,6,8,12-tetramethyl-17-methylidene-5,15-dioxo-2,14-dioxatetracyclo[7.7.1.01,12.03,8]heptadecan-7-yl]acetate	[M+H]+	C27H34O7	LGEAXFGKCGRSHE-MQQWTTMNSA-N	83.8			Lipids and lipid-like molecules	Prenol lipids	Terpene lactones					313693	392349	348637	1.27329e+06	402902	666019	183556	62084.4	48031.8	274386	399240	459626	0.61632	470.23
MP6350	3.42	208.108	2-Methyl-3-[3-(trifluoromethyl)-1H-pyrazol-1-yl]-1-propanamine	[M+H]+	C8H12F3N3		83.8										703809	1.30765e+06	1.49362e+06	1.23948e+06	272380	99000	13631.6	11633	577451	606366	597342	577511	0.0246682	207.098
MP5649	3.52	193.143	Tripropylene glycol	[M+H]+	C9H20O4		83.7										8.56306e+06	7.80905e+06	1.47406e+07	1.46321e+07	3.86496e+06	4.09873e+06	3.88933e+06	3.02756e+06	7.85311e+06	7.86498e+06	7.94059e+06	7.73084e+06	0.0110633	192.136
MP8709	3.633	259.151	Phomolide H	[M+H]+	C13H22O5	TZYNNKFLVAMHEW-RNKUOQLFSA-N	83.7			Organoheterocyclic compounds	Oxocins						4.00711e+07	5.32719e+07	6.17245e+07	5.89785e+07	6.70686e+06	6.08859e+06	7.67742e+06	6.40632e+06	3.04963e+07	3.04964e+07	3.00708e+07	3.04237e+07	0.00670208	258.147
MP27018	3.748	740.462	PEG n16	[M+ACN+H]+	C32H66O17	DHORSBRLGKJPFC-UHFFFAOYSA-N	83.7										1.46626e+06	1.85856e+06	1.55256e+06	1.13111e+06	1.27689e+06	881547	486077	599813	1.14019e+06	1.12688e+06	1.14742e+06	1.14141e+06	0.00760449	722.43
MP5954	3.291	200.047	Ethyl 4-(methylamino)-2-(methylsulfanyl)pyrimidine-5-carboxylate	[M+2H]2+	C9H13N3O2S	VDDZMXQAZJMGPK-UHFFFAOYSA-N	83.7										6.07552e+07	5.71607e+07	5.44072e+07	6.30314e+07	6.08567e+07	5.95043e+07	6.15002e+07	6.13451e+07	6.01214e+07	5.99274e+07	5.74111e+07	6.01158e+07	0.0223082	227.073
MP9736	7.067	282.221	N-{[(2R,4S,5R)-5-Ethyl-1-azabicyclo[2.2.2]oct-2-yl]methyl}-4-morpholinecarboxamide	[M+Na]+	C15H27N3O2		83.7										3.68708e+06	3.94454e+06	3.21227e+06	3.27174e+06	3.3479e+06	2.44131e+06	3.66212e+06	2.51636e+06	3.21406e+06	3.01916e+06	2.88773e+06	2.89286e+06	0.0509408	281.21
MP10151	4.716	292.19	Dendroxine	[M+H]+	C17H25NO3	CCEAFOJVRQZWQC-KFYGABLUSA-N	83.6			Organoheterocyclic compounds	Indoles and derivatives						6.00867e+06	1.29219e+06	2.52366e+06	2.19832e+06	3.27278e+06	2.43281e+06	754671	2.38441e+06	2.59418e+06	2.58032e+06	2.58024e+06	2.64407e+06	0.0116532	291.183
MP12429	3.347	349.182	(2s,3r,4s,5s,6r)-2-{[(1s,4r,6r,7s)-7-hydroxy-1,3,3-trimethyl-2-oxabicyclo[2.2.2]octan-6-yl]oxy}-6-(hydroxymethyl)oxane-3,4,5-triol	[M+H]+	C16H28O8	YOOVLDBPAMVHGW-NRNVMAPKSA-N	83.6			Organic oxygen compounds	Organooxygen compounds	Carbohydrates and carbohydrate conjugates					5.6479e+06	8.90702e+06	6.33586e+06	5.68383e+06	9.12709e+06	1.06438e+07	4.70546e+06	6.82699e+06	7.35496e+06	7.5161e+06	7.31292e+06	7.32364e+06	0.0128097	348.178
MP18373	3.445	511.271	kadlongilactone F	[M+H]+	C30H38O7	VZJUYAIRWXJBGH-WCOIAEODSA-N	83.6			Organoheterocyclic compounds	Naphthopyrans						2.67707e+06	2.40285e+06	2.68483e+06	1.71205e+06	1.06622e+06	1.23852e+06	761832	815151	1.79627e+06	1.79635e+06	1.73971e+06	1.79638e+06	0.0158865	510.262
MP8616	6.749	257.226	Pimara-9(11),15-dien-18-oic acid	[2M+NH4]+	C20H30O2	TVHDZSRRHQKNEZ-UHFFFAOYSA-N	83.5			Lipids and lipid-like molecules	Prenol lipids	Diterpenoids					1.14157e+07	1.12485e+06	7.46448e+06	1.39754e+06	2.00104e+06	170581	137112	1.24538e+06	3.54742e+06	3.72174e+06	3.72068e+06	3.69984e+06	0.0228577	302.225
MP11215	4.415	318.299	Phytosphingosine	[M+H]+	C18H39NO3	AERBNCYCJBRYDG-UHFFFAOYSA-N	83.5	HMDB0004610	C12144	Organic nitrogen compounds	Organonitrogen compounds	Amines	Lipids	SP Sphingolipids	SP01 Sphingoid bases		3.65088e+06	5.35758e+06	5.70008e+06	4.50006e+06	3.22957e+06	2.997e+06	3.8854e+06	2.93979e+06	4.13177e+06	4.1328e+06	4.06006e+06	3.9217e+06	0.0244436	317.293
MP11778	3.586	333.188	Virgineol	[M+H]+	C16H28O7	NGTUFCAUEDFMDI-XZEYQLJZSA-N	83.5			Organoheterocyclic compounds	Furofurans						4.75592e+06	7.3995e+06	9.63961e+06	8.51043e+06	783699	754724	946928	606531	4.37207e+06	4.37215e+06	4.24443e+06	4.37091e+06	0.014664	332.184
MP10037	5.315	289.252	13,14-Dihydroretinol	[M+H]+	C20H32O	OVBOQVAIYMSUDT-CJUKKOHQSA-N	83.5	HMDB0011618	C15492	Lipids and lipid-like molecules	Prenol lipids	Retinoids	Lipids	PR Prenol lipids	PR01 Isoprenoids		7.17742e+06	6.1281e+06	3.80693e+07	1.75155e+06	167340	5.30356e+06	2.41523e+06	339998	5.19192e+06	5.19191e+06	5.11381e+06	5.19176e+06	0.007545	288.245
MP8604	3.611	257.135	Dendrodolide M	[M+H]+	C13H20O5	HGAIDVLZTGTVNA-YUSALJHKSA-N	83.4			Phenylpropanoids and polyketides	Macrolides and analogues						1.19829e+06	6.53255e+06	8.08516e+06	5.95253e+06	1.5254e+06	680395	784481	652502	3.24143e+06	3.15732e+06	3.15729e+06	3.17901e+06	0.0124963	256.131
MP9301	4.267	272.185	4-Oxo-4-[(3-oxo-2-decanyl)amino]butanoic acid	[M+H-H2O]+	C14H25NO4	DGBNCMKQNOJCFB-NSHDSACASA-N	83.4			Lipids and lipid-like molecules	Fatty Acyls	Fatty amides					698102	832039	1.04662e+06	956077	1.32689e+06	1.63543e+06	835224	1.50697e+06	1.0241e+06	1.15333e+06	1.06095e+06	1.02405e+06	0.057254	271.178
MP12394	5.555	348.18	Methylexcentricine	[M+H]+	C19H25NO5	OLOHLLRDMVSIEU-UHFFFAOYSA-N	83.4			Organoheterocyclic compounds	Tetrahydroisoquinolines						1.0829e+07	5.11924e+06	2.86802e+06	2.60021e+06	7.71154e+06	6.18393e+06	1.28161e+07	9.78321e+06	3.94219e+06	3.78841e+06	3.7883e+06	3.82118e+06	0.0190616	347.173
MP4772	3.041	174.112	L-NNA	[M+H]+	C6H13N5O4	MRAUNPAHJZDYCK-BYPYZUCNSA-N	83.4			Organic acids and derivatives	Carboxylic acids and derivatives	Amino acids, peptides, and analogues					1.55048e+06	1.12129e+06	979801	1.41879e+06	740796	383185	153966	161123	806515	815232	805764	805767	0.00571789	219.097
MP20268	3.847	559.177	Physalin Q	[M+H]+	C28H30O12	IRYOOASWRCIZCK-UHFFFAOYSA-N	83.4			Lipids and lipid-like molecules	Steroids and steroid derivatives	Physalins and derivatives					276267	1.98032e+06	891827	53352.7	232964	493975	3.06921e+06	19989.1	899675	925286	887044	884755	0.0206778	558.174
MP5700	6.951	194.117	N,N,N-Trimethylphenylalanine	[M+H]+	C11H15NO2	ULHLQCLIZGYXEV-JTQLQIEISA-N	83.4			Organic acids and derivatives	Carboxylic acids and derivatives	Amino acids, peptides, and analogues					5.65852e+06	1.87933e+07	1.19558e+07	8.15421e+06	7.70457e+06	1.42942e+07	7.64673e+06	8.97151e+06	6.85267e+06	6.97496e+06	516078	6.38006e+06	0.602298	193.11
MP11633	5.383	329.229	Gliomasolide E	[M+H]+	C18H32O5	CIKXQDGRSUPQKJ-AOLGVUMJSA-N	83.4			Phenylpropanoids and polyketides	Macrolides and analogues						4.90466e+06	3.66384e+06	4.02066e+06	4.44118e+06	7.09962e+06	9.73621e+06	6.94044e+06	6.67073e+06	5.05178e+06	5.12051e+06	5.00438e+06	5.08467e+06	0.00975024	328.225
MP15905	4.718	445.276	Dicadalenol	[M+H]+	C30H36O3	DDVIVMMKNAZNJE-FXBCZQQTSA-N	83.3			Phenylpropanoids and polyketides	Isoflavonoids	Isoflavans					1.26495e+07	3.2862e+07	4.20821e+07	2.41353e+07	3.45773e+06	2.20714e+06	2.80685e+06	2.67162e+06	1.71966e+07	1.70372e+07	1.71399e+07	1.67754e+07	0.0109536	444.266
MP15402	4.464	431.26	(2S,5aS,8aR)-6-(4-Methoxybenzyl)-1-methyl-2-[3-(4-morpholinyl)-3-oxopropyl]octahydropyrrolo[3,2-E][1,4]diazepin-5(2H)-one	[M+H]+	C23H34N4O4		83.3										6.7081e+06	2.12685e+07	2.6886e+07	1.50929e+07	1.80995e+06	718846	1.22083e+06	1.50052e+06	1.10259e+07	1.10267e+07	1.06906e+07	1.10268e+07	0.0153475	430.258
MP1526	3.158	97.0646	2-Methyl-2-cyclopentenone	[M+H]+	C6H8O	ZSBWUNDRDHVNJL-UHFFFAOYSA-N	83.3	HMDB0031545		Organic oxygen compounds	Organooxygen compounds	Carbonyl compounds					36388.2	161952	145560	109329	1.01176e+06	76894.5	40947.6	42020.1	193407	197401	199143	186029	0.0300419	96.0575
MP13413	6.248	375.25	Corymbi-7,13E-dienolide	[M+H]+	C23H34O4	LLMHUMBEEZSSMH-UHFFFAOYSA-N	83.3			Phenylpropanoids and polyketides	Macrolides and analogues						2.84797e+06	3.80161e+06	3.96032e+06	3.74493e+06	4.95133e+06	7.10519e+06	6.34931e+06	5.93058e+06	4.61516e+06	4.61503e+06	4.54087e+06	4.54177e+06	0.00930375	374.246
MP3424	0.893	144.102	N-Cyclopentylglycine	[M+H-H2O]+	C7H13NO2	LRHRHAWNXCGABU-UHFFFAOYSA-N	83.3										660698	1.10117e+06	189992	949429	1.78119e+06	167601	128990	157091	821746	876133	853961	881080	0.0314952	143.095
MP12236	4.301	344.135	(1S,4R,7S,8S,11S)-9-tert-butyl-7,9-dihydroxy-3,5,12-trioxatetracyclo[6.6.0.0a,aa.0,]tetradecane-2,6,13-trione	[M+H]+	C15H18O8		83.2										1.87935e+06	2.98359e+06	3.20922e+06	2.21425e+06	203376	148988	166483	216868	1.48507e+06	1.47594e+06	1.47979e+06	1.49371e+06	0.00518558	326.1
MP12274	4.151	345.188	Cytospolide N	[M+H]+	C17H28O7	AXMYBKVKZPWGTH-BAGFCZJQSA-N	83.2			Organic acids and derivatives	Carboxylic acids and derivatives	Dicarboxylic acids and derivatives					1.51814e+07	2.55681e+07	4.3102e+07	2.87065e+07	3.11794e+06	1.72224e+06	2.532e+06	2.1752e+06	1.60215e+07	1.60665e+07	1.59958e+07	1.59958e+07	0.00208301	344.184
MP4037	0.623	157.097	1,3-Dimethylnaphthalene	[M+H]+	C12H12	QHJMFSMPSZREIF-UHFFFAOYSA-N	83.2			Benzenoids	Naphthalenes						268944	1.28067e+06	1.27321e+07	1.59757e+06	2.65016e+07	1.42834e+06	280159	1.04399e+06	6.22917e+06	6.04822e+06	6.01033e+06	6.01017e+06	0.0172311	156.094
MP15183	4.615	425.31	Heptapropylene glycol	[2M+Na]+	C21H44O8	OWRNLGZKEZSHGO-UHFFFAOYSA-N	83.2			Organic oxygen compounds	Organooxygen compounds	Alcohols and polyols					5.50358e+07	8.58881e+07	1.03839e+08	7.89407e+07	9.25617e+06	1.11278e+07	1.35238e+07	1.06565e+07	4.77877e+07	4.75801e+07	4.75806e+07	4.81307e+07	0.00543651	424.304
MP15983	4.451	447.255	1-(4-{5-[(2S)-1-(4-Methylbenzyl)-2-pyrrolidinyl]-1,2,4-oxadiazol-3-yl}-2-pyridinyl)-4-piperidinecarboxamide	[2M+H]+	C25H30N6O2		83.2										5.19338e+06	1.33756e+07	1.11207e+07	1.24648e+07	896025	571453	580492	1.06817e+06	5.30995e+06	6.36754e+06	5.12177e+06	5.09412e+06	0.110315	446.243
MP7074	3.69	224.103	3-Phenyl-3-[(phenylacetyl)amino]propanoic acid	[M+H]+	C17H17NO3	URKWJOAJRKPEFW-UHFFFAOYSA-N	83.1			Organic acids and derivatives	Carboxylic acids and derivatives	Amino acids, peptides, and analogues					814698	1.02583e+06	1.14005e+06	841759	519208	33968.5	50317.2	79640.7	516933	528570	516916	549904	0.0294461	283.121
MP7971	2.946	243.182	Lycodine	[M+H]+	C16H22N2	JJPMUZRSJKMFRK-OQMKEHIESA-N	83.1	HMDB0254255	C09876	Organoheterocyclic compounds	Phenanthrolines						3.19715e+06	2.64598e+06	2.59121e+06	2.72378e+06	2.48476e+06	3.05142e+06	2.71229e+06	3.71976e+06	2.26851e+06	2.2606e+06	2.24038e+06	2.2536e+06	0.00529053	242.178
MP7964	4.226	243.156	2-[(3S)-1-Cyclobutyl-3-pyrrolidinyl]-1H-imidazo[4,5-b]pyridine	[M+CH3OH+H]+	C14H18N4		83.1										1.09092e+06	508380	1.24298e+06	1.08351e+06	1.90803e+06	3.80925e+06	1.57765e+06	2.3514e+06	1.68904e+06	1.65195e+06	1.64002e+06	1.64011e+06	0.0140109	242.153
MP13544	3.511	379.148	2-Hydroxy-3-(2-hydroxy-3-methyl-3-buten-1-yl)-4-methoxy-6-(2-phenylethyl)benzoic acid	[M+CH3OH+H]+	C21H24O5		83.1										717297	3.74661e+06	2.22825e+06	2.72433e+06	366026	168101	22787.4	92233.3	1.27207e+06	1.34323e+06	1.34359e+06	1.27644e+06	0.0305373	356.162
MP12817	4.761	359.239	Pracinostat	[M+Na]+	C20H30N4O2	JHDKZFFAIZKUCU-ZRDIBKRKSA-N	83	HMDB0256722		Phenylpropanoids and polyketides	Cinnamic acids and derivatives						344346	103362	1.57125e+06	754826	2.48737e+06	5.11598e+06	3.11651e+06	4.13375e+06	1.81411e+06	1.85863e+06	2.08224e+06	1.81572e+06	0.067653	358.237
MP8447	1.096	254.161	CI 4	[M+H]+	C11H19N5O2	ZRJHYOXNWCMGMW-HGXVMFPFNA-N	83										655660	1.08184e+06	564419	670560	766964	1.12394e+06	224972	285872	618714	638180	637838	638199	0.0152877	253.154
MP9296	4.68	272.125	2-{[methyl(2,3,4,5,6-pentahydroxyhexyl)amino]methylidene}malononitrile	[M+Na]+	C11H17N3O5	UISCZCOBXZDXOU-UHFFFAOYSA-N	83										2.13514e+06	1.34592e+06	1.23998e+06	1.15374e+06	2.90445e+06	3.91354e+06	1.20342e+06	2.13888e+06	2.21138e+06	2.124e+06	2.05293e+06	2.05556e+06	0.0353338	271.117
MP12710	4.246	356.278	Butyryl fentanyl-d5	[M+H]+	C23H252H5N2O		83										1.17297e+06	1.36589e+06	2.54082e+06	1.13389e+06	1.17026e+06	1.16581e+06	1.05183e+06	1.28859e+06	1.50341e+06	1.45021e+06	1.45014e+06	1.45011e+06	0.0181956	579.012
MP6945	3.068	221.169	1-(4-Methoxybenzyl)-4-piperidinamine	[M+H]+	C13H20N2O	JDACBLXRPFJSHT-UHFFFAOYSA-N	83			Organoheterocyclic compounds	Piperidines	Benzylpiperidines					3.29023e+07	2.62787e+07	2.08386e+07	2.16486e+07	2.36403e+07	2.39987e+07	2.57586e+07	2.91025e+07	1.91421e+07	1.91421e+07	1.88834e+07	1.90591e+07	0.00640011	220.158
MP19304	4.601	534.323	Epothilone I3	[M+H]+	C30H47NO5S	SHWUXGHQECDXLJ-MUMHOSTJSA-N	82.9			Phenylpropanoids and polyketides	Macrolides and analogues						5.10274e+06	7.34811e+06	8.5897e+06	5.90791e+06	788721	269332	566519	828009	4.15532e+06	4.19085e+06	4.13317e+06	4.13332e+06	0.00654718	533.317
MP18287	4.361	509.246	Tubastrindole B	[M+H]+	C28H28N8O2	AMPTWLHXXYAHSB-KUVAJCMUSA-N	82.9			Organoheterocyclic compounds	Indoles and derivatives	Carbazoles					4.76612e+06	6.90483e+06	5.25701e+06	3.42396e+06	737237	485735	392872	683996	3.06304e+06	3.06236e+06	3.06333e+06	2.89828e+06	0.0272416	508.234
MP164	0.529	72.0807	2-Methyl-1,2-propanediamine	[M+H]+	C4H12N2		82.9										558908	2.44498e+06	2.1474e+06	1.63027e+06	2.53621e+06	3.55591e+06	3.768e+06	3.39774e+06	2.80535e+06	2.82273e+06	2.77685e+06	2.76169e+06	0.00985543	88.1
MP849	7.567	83.0601	2-Methyl-1H-imidazole	[M+H]+	C4H6N2	LXBGSDVWAMZHDD-UHFFFAOYSA-N	82.8			Organoheterocyclic compounds	Azoles	Imidazoles					6.76106e+06	1.90746e+07	1.28016e+07	1.30131e+07	1.34936e+07	1.90716e+07	1.02501e+07	1.17997e+07	1.20437e+07	1.14283e+07	1.26422e+07	1.14279e+07	0.0489642	82.0531
MP7286	4.673	228.195	Andrachcinidine	[M+H]+	C13H25NO2	GFVMHSQLCIEXNG-YNEHKIRRSA-N	82.8			Organoheterocyclic compounds	Piperidines						1.09518e+06	1.50523e+06	1.6667e+06	4.13406e+06	1.98527e+06	2.30095e+06	1.29436e+06	2.15507e+06	2.14658e+06	2.17523e+06	2.14657e+06	2.15283e+06	0.00631348	227.189
MP19886	4.815	549.359	Manzamine A	[M+H]+	C36H44N4O	FUCSLKWLLSEMDQ-MGOZPMTQSA-N	82.8	HMDB0242555	C19898	Alkaloids and derivatives	Harmala alkaloids						5.65327e+07	7.66391e+07	8.43666e+07	5.93766e+07	1.09614e+07	7.33883e+06	1.05184e+07	9.64935e+06	4.68855e+07	4.69015e+07	4.6914e+07	4.38226e+07	0.0333597	548.352
MP14609	0.543	408.918	4-bromo-3-methyl-1H-pyrazole-5-carboxylic acid	[M+H]+	C5H5BrN2O2	XIZPNSLYWMMPNI-UHFFFAOYSA-N	82.7			Organoheterocyclic compounds	Azoles	Pyrazoles					1.2703e+07	1.42565e+07	1.20343e+07	1.63312e+07	1.93215e+07	2.33799e+07	7.90466e+06	1.59337e+07	1.77739e+07	1.78652e+07	1.76696e+07	1.77265e+07	0.00465947	203.953
MP12006	5.95	338.341	Erucamide	[M+H]+	C22H43NO	UAUDZVJPLUQNMU-KTKRTIGZSA-N	82.7	HMDB0244507		Lipids and lipid-like molecules	Fatty Acyls	Fatty amides					4.41771e+07	4.95796e+07	9.30734e+07	5.66849e+06	1.5329e+07	3.55491e+07	1.00145e+07	3.81001e+06	1.01597e+07	2.05017e+07	1.76731e+07	1.1311e+07	0.334013	337.334
MP5132	7.437	181.988	3-(5-Chloro-1,3-benzothiazol-2-yl)propanoic acid	[M+H]+	C10H8ClNO2S	UMBLVHSXXWQLDL-UHFFFAOYSA-N	82.7			Organoheterocyclic compounds	Benzothiazoles						1.58989e+07	1.64155e+07	1.75604e+07	1.7625e+07	1.68954e+07	1.58855e+07	1.62804e+07	1.6294e+07	1.65763e+07	1.65824e+07	1.64128e+07	1.60771e+07	0.0144259	240.996
MP10969	4.383	313.164	(1S,2S,5R,6S,9R)-5-(Methoxymethyl)-9-Methyl-3-Oxaspiro[Tricyclo[7.4.0.0^{2,6}]Tridecane-13,2'-[1,3,4]Trioxolane]-4-One	[M+H]+	C16H24O6	UFWMHWUUKNSLOE-ZNNJNPNGSA-N	82.7			Organoheterocyclic compounds	Naphthofurans						1.11644e+06	2.36368e+06	6.44815e+06	7.96233e+06	1.00616e+06	1.823e+06	8.191e+06	1.1959e+06	4.15991e+06	4.12452e+06	4.09721e+06	4.09731e+06	0.00721018	312.157
MP13452	7.008	376.318	N-(m-Methoxybenzyl)hexadecanamide	[M+H]+	C24H41NO2	FIQGQTITXPTKIY-UHFFFAOYSA-N	82.7			Benzenoids	Phenol ethers	Anisoles					2.61283e+06	3.11334e+06	1.63028e+06	5.64067e+06	1.82457e+06	3.00579e+06	2.68581e+06	5.69856e+06	4.37556e+06	4.45827e+06	136314	3.21543e+06	0.663513	375.314
MP16428	5.111	460.202	rel(8S,19S)19,20dihydro9,19,20trihydroxy8methoxy9epifumitremorgin C	[M+H]+	C23H29N3O7	JTZDDPDEGUVQKP-HOKSWIGBSA-N	82.7			Organoheterocyclic compounds	Indoles and derivatives	Pyridoindoles					58639.1	60429.9	254983	107275	298508	4.02396e+06	7.35706e+06	5.87853e+06	2.12476e+06	2.11315e+06	2.10772e+06	2.12485e+06	0.00405495	459.201
MP8156	1.462	247.165	Subnudatone B	[M+H]+	C16H22O2	DOSLTUUOYPPLRQ-GADBESIXSA-N	82.7			Organoheterocyclic compounds	Naphthopyrans						5506.89	10463.1	3529.48	25748.5	379189	354950	123764	626535	20894.7	33432.9	82775.8	22783	0.727142	246.162
MP8544	2.097	256.115	6-(2-Methoxybenzylamino)purine	[M+H]+	C13H13N5O	STWJKIOLMNHFIK-UHFFFAOYSA-N	82.7			Organoheterocyclic compounds	Imidazopyrimidines	Purines and purine derivatives					523290	632535	907755	664718	963520	1.03663e+06	841471	718326	785922	790634	773411	790646	0.0103648	255.112
MP6510	0.681	212.139	N-Benzyl-2-Phenylethanamine	[M+H]+	C15H17N	UPABQMWFWCMOFV-UHFFFAOYSA-N	82.7			Benzenoids	Benzene and substituted derivatives	Phenethylamines					641744	514342	338459	311614	346259	422138	287987	62477.9	338391	340321	333870	323045	0.0231484	211.136
MP8971	3.119	265.195	Oxymatrine	[M+H]+	C15H24N2O2	XVPBINOPNYFXID-UHFFFAOYSA-N	82.7		C10749	Alkaloids and derivatives	Lupin alkaloids	Matrine alkaloids	Alkaloids	Alkaloids derived from lysine	Quinolizidine alkaloids		1.10039e+07	1.00409e+07	9.70237e+06	1.01524e+07	9.7565e+06	1.06025e+07	1.09081e+07	2.44221e+07	1.08611e+07	1.04392e+07	1.05443e+07	1.04385e+07	0.0189045	264.184
MP12665	6.367	355.245	14-(hydroxymethyl)-5,5,9-trimethyltetracyclo[11.2.1.0,.0,]hexadecane-7,14,15,16-tetrol	[M+H]+	C20H34O5		82.6										1.15424e+06	996010	888830	1.18127e+06	744701	3.33105e+06	2.04602e+06	1.49913e+07	3.08195e+06	3.08072e+06	3.08754e+06	2.77048e+06	0.0520744	354.241
MP4953	1.055	178.107	N-Propyl-7H-purin-6-amine	[M+H]+	C8H11N5	CIAUYDNALIJKPK-UHFFFAOYSA-N	82.6										503401	1.12128e+06	915630	814703	2.46339e+06	665390	321042	230919	865611	831050	865590	865551	0.020149	177.101
MP10610	6.69	303.231	18-HETE	[M+H-H2O]+	C20H32O3	PPCHNRUZQWLEMF-LFFPGIGVSA-N	82.6	HMDB0006245		Lipids and lipid-like molecules	Fatty Acyls	Eicosanoids					4.24621e+07	1.51685e+07	1.42568e+08	7.64918e+06	9.87365e+06	87325.9	183266	4.3939e+06	2.67886e+07	2.72575e+07	2.67873e+07	2.74984e+07	0.0130929	320.235
MP5643	2.308	193.1	(2s,3r,4s,5r)-3,4,5-trimethoxyoxan-2-ol	[M+H]+	C8H16O5	AIVDIFJVLZSYIK-CWKFCGSDSA-N	82.6			Organic oxygen compounds	Organooxygen compounds	Carbohydrates and carbohydrate conjugates					5736.43	466189	1.17289e+06	6507.73	2.94975e+06	789202	25648.6	488402	558002	556923	559644	557209	0.00218925	192.1
MP4035	2.761	157.083	(1s,5r,7s)-7-methyl-2,6-dioxabicyclo[3.3.1]nonan-3-one	[M+H]+	C8H12O3	CSLHHTJTXNNRSR-LYFYHCNISA-N	82.6			Organoheterocyclic compounds	Lactones	Delta valerolactones					8.13593e+06	1.0593e+07	1.53026e+07	1.59335e+07	1.30254e+07	1.24792e+07	1.3893e+07	1.76049e+07	1.40796e+07	1.40802e+07	1.22546e+07	1.40786e+07	0.0669757	156.079
MP11706	4.132	331.208	AB-PINACA	[M+ACN+H]+	C18H26N4O2	GIMHPAQOAAZSHS-HNNXBMFYSA-N	82.6	HMDB0247743	C22704	Organic acids and derivatives	Carboxylic acids and derivatives	Amino acids, peptides, and analogues					1.03834e+08	1.40227e+08	1.68092e+08	1.6879e+08	2.52929e+07	3.85806e+07	2.24482e+07	2.33153e+07	8.80103e+07	8.77453e+07	8.73676e+07	8.76116e+07	0.00305706	330.206
MP7673	0.526	237.034	(4-Hydroxy-quinazolin-2-ylsulfanyl)-acetic acid	[M+H]+	C10H8N2O3S	MVJSWCZVASBMCH-UHFFFAOYSA-N	82.6										118440	209643	207748	88623.1	141019	97267.9	869213	206668	146388	146175	136539	105173	0.145841	236.026
MP10531	6.386	301.215	(2Z)-3-methyl-5-(1,2,5,5-tetramethyl-7-oxo-1,2,3,4,4a,5,6,7-octahydronaphthalen-1-yl)pent-2-enoic acid	[M+Na]+	C20H30O3		82.6										1.0705e+07	2.21753e+06	6.86801e+06	2.59493e+06	3.16362e+06	910941	1.96085e+06	765439	2.26119e+06	3.03994e+06	3.04235e+06	3.04722e+06	0.137305	318.219
MP18641	6.373	518.373	Orlistat	[2M+NH4]2+	C29H53NO5	AHLBNYSZXLDEJQ-UHFFFAOYSA-N	82.6	HMDB0015215		Organic acids and derivatives	Carboxylic acids and derivatives	Amino acids, peptides, and analogues					2.61138e+07	2.26696e+07	2.91464e+07	2.21326e+07	2.29425e+07	2.33505e+07	2.49122e+07	2.66858e+07	2.20392e+07	2.625e+07	2.28731e+07	2.43706e+07	0.077432	495.392
MP3470	3.976	145.122	4-(1-hydroxyethyl)cyclohexan-1-ol	[M+H]+	C8H16O2	QJLYVCMEBJYLQD-UHFFFAOYSA-N	82.6			Organic oxygen compounds	Organooxygen compounds	Alcohols and polyols					698624	764977	717040	796653	778973	674509	910536	809506	667209	640739	657117	667338	0.0190328	144.115
MP17006	4.396	476.282	Longichalasin B	[M+H]+	C30H37NO4	GGQJVEJLGIJFPD-AONOITRRSA-N	82.6			Organoheterocyclic compounds	Isoindoles and derivatives	Isoindolines					5.18676e+06	7.01003e+06	9.59118e+06	6.48396e+06	729147	432443	531600	643895	3.9175e+06	3.95977e+06	3.88883e+06	3.8712e+06	0.00989056	475.272
MP6018	5.16	201.163	Alpha-Corocalene	[M+H]+	C15H20	VTUZIFHLLUSULC-UHFFFAOYSA-N	82.6	HMDB0038204		Lipids and lipid-like molecules	Prenol lipids	Sesquiterpenoids					1.34924e+06	585715	1.69955e+06	850772	1.26643e+06	141256	125953	705250	843575	815662	833919	843396	0.0157255	200.157
MP5148	1.016	182.117	N,N-Dimethyldopamine	[M+H]+	C10H15NO2	XJTVXBWTYZCUJX-UHFFFAOYSA-N	82.6			Benzenoids	Phenols	Benzenediols					146205	581637	1.21103e+06	492242	1.16976e+06	186879	67970.6	7774.04	474936	473853	471259	461349	0.0131722	181.11
MP8510	5.967	255.231	2-trans-Hexadecenoic acid	[M+H]+	C16H30O2	ZVRMGCSSSYZGSM-CCEZHUSRSA-N	82.5	HMDB0010735		Lipids and lipid-like molecules	Fatty Acyls	Fatty acids and conjugates					1.61055e+06	1.66104e+06	1.82692e+06	2.35422e+06	2.3101e+06	3.1645e+06	2.91177e+06	3.01971e+06	2.41433e+06	2.41527e+06	2.41524e+06	2.49652e+06	0.0167494	254.225
MP22049	5.012	606.38	Destruxin A5	[M+H]+	C31H51N5O7	PGUIAWATJDLBEN-QSLKNBNISA-N	82.5			Organic acids and derivatives	Peptidomimetics	Depsipeptides					6.07607e+06	7.3766e+06	8.84354e+06	5.94024e+06	983763	769794	890719	886279	4.80208e+06	4.63035e+06	4.62807e+06	4.69495e+06	0.0174022	605.379
MP5281	4.062	185.114	1-methyl-5-(propan-2-yl)-3,6,7-trioxatricyclo[3.2.2.0,]nonane	[M+H]+	C10H16O3		82.5										1.38829e+07	1.28594e+07	1.24346e+07	1.38931e+07	1.71295e+07	1.90295e+07	1.73472e+07	2.0232e+07	1.59498e+07	1.58919e+07	1.58466e+07	1.58463e+07	0.00308676	184.11
MP18292	7.291	509.278	Sporochartine F	[M+H]+	C27H40O9	CPYDOXWTPKFFRN-KYZFODTRSA-N	82.5			Organic acids and derivatives	Carboxylic acids and derivatives	Tetracarboxylic acids and derivatives					412442	636806	2.05349e+06	378844	432122	334599	1.01462e+06	1.92028e+06	89234.9	51660.2	134889	192822	0.519435	508.267
MP5609	0.571	192.159	Diheptyl phthalate	[M+H]+	C22H34O4	JQCXWCOOWVGKMT-UHFFFAOYSA-N	82.5	HMDB0251285	C14575	Benzenoids	Benzene and substituted derivatives	Benzoic acids and derivatives					1.60704e+06	1.13485e+06	1.21485e+06	3.24393e+06	2.95858e+06	1.78373e+06	1.22963e+06	1.42563e+06	1.63236e+06	49928	1.52144e+06	1.63556e+06	0.640657	362.246
MP5868	5.309	198.185	Laurolactam	[M+H]+	C12H23NO	JHWNWJKBPDFINM-UHFFFAOYSA-N	82.5			Phenylpropanoids and polyketides	Macrolactams						2.63242e+06	1.39115e+06	2.73309e+06	5.37778e+06	2.87074e+06	3.23558e+06	1.57677e+06	5.5174e+06	3.189e+06	3.16528e+06	3.16525e+06	3.29508e+06	0.0193433	197.178
MP25400	5.022	697.386	n-[19-benzyl-11,18,21-trihydroxy-16-isopropyl-13-methyl-2,8,15-trioxo-9-(sec-butyl)-14-oxa-1,7,10,17,20-pentaazatricyclo[20.3.0.0,]pentacosa-10,17,20-trien-12-yl]ethanimidic acid	[M+H]+	C36H52N6O8		82.5										8.46988e+06	1.22014e+07	1.12355e+07	7.77655e+06	1.60563e+06	964199	1.36086e+06	1.20056e+06	5.75339e+06	5.90328e+06	5.90312e+06	5.86124e+06	0.0120798	696.385
MP7625	0.662	236.149	Benzedrone	[M+H]+	C17H19NO	KWHZRPBDEAQYDE-UHFFFAOYSA-N	82.4										2.45111e+06	3.88107e+06	3.21056e+06	5.14375e+06	2.47979e+06	3.39705e+06	4.60732e+06	2.69023e+06	2.99665e+06	3.0425e+06	3.03664e+06	2.99579e+06	0.00833176	253.147
MP9743	6.896	282.278	Oleamide	[M+NH4]+	C18H35NO	FATBGEAMYMYZAF-UHFFFAOYSA-N	82.4	HMDB0002117	C19670	Lipids and lipid-like molecules	Fatty Acyls	Fatty amides	Lipids	FA Fatty acyls	FA08 Fatty amides		9.23691e+07	4.88098e+07	9.13554e+07	9.28368e+07	6.84323e+07	9.8427e+07	5.10586e+07	1.74634e+08	1.39794e+08	1.42167e+08	1.36257e+08	1.42978e+08	0.0214835	281.272
MP8653	3.723	258.148	Elaeocarpenine	[M+H]+	C16H19NO2	KNSLYJICIDVPEX-UGPWUYPHNA-N	82.3										634955	11183.5	1.75435e+06	43295.1	3.36504e+06	1.76489e+06	1.23973e+06	1.40875e+06	1.35484e+06	1.31582e+06	1.35115e+06	1.34254e+06	0.0131353	257.142
MP22290	3.658	613.339	BE 18257B	[M+H]+	C31H44N6O7	UMKHUVRCCMAOBN-RGZKPZSGSA-N	82.3			Organic acids and derivatives	Carboxylic acids and derivatives	Amino acids, peptides, and analogues					1.59245e+06	2.17576e+06	1.84458e+06	1.38474e+06	1.87329e+06	1.39084e+06	679695	1.09692e+06	1.58713e+06	1.60426e+06	1.55768e+06	1.60448e+06	0.0138655	612.327
MP23193	4.766	637.412	Arachidonic acid-biotin	[M+CH3OH+H]+	C35H58N4O3S	RPYSWRMECJXHSJ-QYXQEGSISA-N	82.3										1.60293e+07	2.17829e+07	2.37364e+07	1.62967e+07	3.2854e+06	2.12553e+06	3.4447e+06	2.57837e+06	1.29583e+07	1.27359e+07	1.29659e+07	1.2311e+07	0.0240908	614.423
MP13703	5.713	384.193	3-{[2,6-dihydroxy-3-(3-methylbut-2-en-1-yl)indol-3-yl]methyl}-1-hydroxy-3h,6h,7h,8h,8ah-pyrrolo[1,2-a]pyrazin-4-one	[M+H]+	C21H25N3O4	VKKSVIBSKZGZJM-UHFFFAOYSA-N	82.3			Organic acids and derivatives	Carboxylic acids and derivatives	Amino acids, peptides, and analogues					969609	715326	746539	1.1439e+06	1.04422e+06	8.56543e+06	5.0843e+06	7.18503e+06	3.04073e+06	2.9653e+06	2.96723e+06	3.31654e+06	0.0541832	383.185
MP18282	5.242	509.213	(1r,2r,16s,18s)-11-hydroxy-7-(2-hydroxypropan-2-yl)-16-methoxy-20,20-dimethyl-18-(3-methylbut-2-en-1-yl)-3,8,19-trioxahexacyclo[14.4.1.0,.0,.0,.0,]henicosa-4,6,9,11,14-pentaene-13,17-dione	[M+H]+	C29H32O8		82.3										134943	495118	465877	158257	905535	1.75325e+06	1.69237e+06	1.66457e+06	1.00557e+06	998001	985348	985273	0.0100678	508.21
MP13773	5.583	386.208	N-{4-[(2R,3R)-3-(Hydroxymethyl)-4-methyl-5-oxo-2-morpholinyl]phenyl}-3-phenylpropanamide	[M+NH4]+	C21H24N2O4		82.3										863663	922618	2.98474e+06	2.87185e+06	687977	553697	3.67255e+06	1.89023e+06	1.83384e+06	1.80214e+06	1.77651e+06	1.86626e+06	0.0213824	368.174
MP11246	3.275	319.136	(4E)-1,7-Bis(4-hydroxyphenyl)-4-hepten-3-one	[M+Na]+	C19H20O3		82.2										1.10614e+06	1.52952e+06	1.71337e+06	1.14388e+06	2.73463e+06	1.07177e+06	823127	1.5949e+06	1.29634e+06	1.3575e+06	1.31691e+06	1.33471e+06	0.0196129	296.141
MP12885	3.943	361.219	5-{5-[(2S)-1-(2,2-Dimethylpropyl)-2-pyrrolidinyl]-1,2,4-oxadiazol-3-yl}-2-(2-methoxyethoxy)pyridine	[M+Na]+	C19H28N4O3		82.2										1.91213e+07	3.27456e+07	3.86077e+07	3.23072e+07	2.61621e+06	1.89399e+06	3.48585e+06	2.45136e+06	1.77717e+07	1.74105e+07	1.7409e+07	1.74321e+07	0.0101431	360.216
MP8065	3.406	245.185	Nerolidol	[M+Na]+	C15H26O	FQTLCLSUCSAZDY-UHFFFAOYSA-N	82.2	HMDB0041629	C09704	Lipids and lipid-like molecules	Prenol lipids	Sesquiterpenoids	Lipids	PR Prenol lipids	PR01 Isoprenoids		666453	2.84606e+06	3.31769e+06	2.23383e+06	1.90247e+06	1.48401e+06	1.89796e+06	1.48918e+06	1.94053e+06	1.94461e+06	1.93117e+06	1.94373e+06	0.00316906	222.198
MP6300	7.442	207.017	2-(4-Chlorobenzyl)succinic acid	[M+H]+	C11H11ClO4	ZUYLPFIRBGKDRV-UHFFFAOYSA-N	82.2										3.87765e+07	3.8854e+07	3.66645e+07	3.85876e+07	3.82523e+07	3.86319e+07	3.83238e+07	3.89091e+07	3.91028e+07	3.91021e+07	3.8905e+07	3.88891e+07	0.00304539	242.035
MP13548	4.406	379.174	(2S,3S,9R,12R,13R,14S,15R,16R,17S)-3,12,13,15,16-pentahydroxy-2,6,14,17-tetramethyl-10-oxatetracyclo[7.7.1.0,.0al,a]heptadec-5-ene-4,11-dione	[M+H]+	C20H28O8		82.2										4.97339e+06	2.08158e+06	8.61014e+06	1.5391e+06	6.4418e+06	3.24977e+06	6.08222e+06	3.76774e+06	4.78732e+06	4.71133e+06	4.64599e+06	4.7485e+06	0.0127345	396.178
MP13881	4.381	389.25	5,5,9,13-tetramethyl-7-(phenylmethylidene)tetracyclo[11.2.1.0,.0,]hexadec-14-ene-6,12-dione	[M+H]+	C27H32O2		82.2										9.00811e+07	1.19737e+08	1.31527e+08	1.02878e+08	1.51444e+07	3.46317e+07	1.75324e+07	1.7232e+07	6.97074e+07	6.94965e+07	6.95213e+07	6.97793e+07	0.00199488	388.24
MP6313	4.535	207.141	1-{3,4,5',6'-tetrahydro-2h,4'h,5h-[2,3'-bipyridin]-1'-yl}ethanone	[M+H]+	C12H18N2O	QNIAXHGFFZVMHW-UHFFFAOYSA-N	82.1			Organoheterocyclic compounds	Pyridines and derivatives	Hydropyridines					404966	646119	747699	658246	1.46535e+06	766337	768560	767849	842923	830359	818554	844524	0.0145552	206.142
MP4505	7.583	167.998	2-Mercaptobenzothiazole	[M+ACN+H]+	C7H5NS2	YXIWHUQXZSMYRE-UHFFFAOYSA-N	82.1	HMDB0030524	C14437	Organoheterocyclic compounds	Benzothiazoles						1.11657e+07	1.14898e+07	1.05645e+07	1.10842e+07	1.03489e+07	7.67531e+06	1.13354e+07	1.00886e+07	1.12249e+07	1.11444e+07	1.12258e+07	1.09812e+07	0.0103282	166.986
MP5652	4.817	193.158	6-isopropyl-1-methyl-1,2,3,3a,5,7a-hexahydroinden-4-one	[M+H]+	C13H20O	QCGKUVQFKYIGAV-UHFFFAOYSA-N	82			Organic oxygen compounds	Organooxygen compounds	Carbonyl compounds					608302	762540	938066	5.07334e+06	1.20264e+06	1.65282e+06	1.39315e+06	8.76392e+06	2.86621e+06	2.86757e+06	2.64467e+06	2.82097e+06	0.0377518	192.151
MP10715	5.854	306.278	(2E,4E,10Z)-N-Isobutyl-2,4,10-hexadecatrienamide	[2M+NH4]+	C20H35NO		82										3.19911e+06	3.41279e+06	2.70473e+06	1.86778e+06	4.93606e+06	3.12252e+06	2.24366e+06	3.5326e+06	2.9822e+06	2.87479e+06	2.84786e+06	2.92815e+06	0.0204687	305.272
MP23255	4.861	639.344	Cimicidanol-3-O-alpha-L-arabinoside	[M+Na]+	C35H52O9	PYBFXJMIKJNNAJ-UHFFFAOYSA-N	82			Lipids and lipid-like molecules	Steroids and steroid derivatives	Cycloartanols and derivatives					9.98154e+06	1.49941e+07	1.52518e+07	9.93749e+06	1.90908e+06	1.25808e+06	1.73665e+06	1.68349e+06	6.56019e+06	6.56671e+06	7.33754e+06	6.55925e+06	0.0573951	616.361
MP16585	4.228	464.236	(1R,9S)-11-(1-Acetyl-4-piperidinyl)-5-(2-naphthyl)-7,11-diazatricyclo[7.3.1.02,7]trideca-2,4-dien-6-one	[M+Na]+	C28H31N3O2		82										1.67349e+07	2.75215e+07	2.68982e+07	1.88547e+07	2.6977e+06	1.80602e+06	1.86376e+06	2.58512e+06	1.36115e+07	1.36117e+07	1.34772e+07	1.33855e+07	0.00817782	441.242
MP13745	6.526	385.291	4-(Dimethylamino)-N-{[(2R,4S,5S)-5-(1-piperidinylmethyl)-1-azabicyclo[2.2.2]oct-2-yl]methyl}benzamide	[M+Na]+	C23H36N4O		82										9.49938e+06	9.22748e+06	8.60205e+06	6.71512e+06	1.12739e+07	4.10674e+07	2.5772e+07	3.8529e+07	1.71686e+07	1.71707e+07	1.6936e+07	1.67001e+07	0.0132199	384.289
MP19430	6.61	537.305	(3beta,9xi)-3-(beta-D-Glucopyranosyloxy)-14-hydroxycard-20(22)-enolide	[M+ACN+H]+	C29H44O9	CMHWMOGWFZWDMR-HUYLTWADSA-N	82										2915.78	95160.9	110352	1450.51	44573.7	49009.5	24940.7	37564.5	3488.57	3441.09	42750.9	7723.61	1.32669	536.299
MP6979	4.936	222.069	1-(5-amino-2-phenyl-[1,3,4]thiadiazol-3-yl)ethanone	[2M+Na]2+	C10H11N3OS	FSUOZVHASSEDMX-UHFFFAOYSA-N	81.9										2.0713e+06	2.6454e+06	3.34319e+06	2.19626e+06	3.4141e+06	1.80987e+06	1.69867e+06	1.7204e+06	2.50944e+06	2.44702e+06	2.42726e+06	2.42754e+06	0.0158463	221.062
MP11868	3.142	335.167	(4aR,7aR)-6-(1,3-Benzodioxol-5-ylmethyl)-4-(2-methoxyethyl)hexahydropyrrolo[3,4-b][1,4]oxazin-3(2H)-one	[M+Na]+	C17H22N2O5		81.8										3.79233e+06	3.25535e+06	3.87411e+06	2.36438e+06	1.4522e+06	1.93708e+06	935301	980404	2.33747e+06	2.42009e+06	2.31715e+06	2.31766e+06	0.020836	334.153
MP8327	5.6	251.2	(+)-Sclareolide	[M+H-H2O]+	C16H26O2	IMKJGXCIJJXALX-UELODSCDNA-N	81.7	HMDB0035293		Organoheterocyclic compounds	Naphthofurans						28785	868575	1.27453e+06	1.12071e+06	656552	1.4837e+06	6.18907e+06	4.79613e+06	1.9582e+06	1.95179e+06	25942.7	1.9502e+06	0.654918	250.193
MP16972	4.462	475.286	2,3-bis(hexanoyloxy)-5-hydroxy-6-(hydroxymethyl)oxan-4-yl hexanoate	[M+H]+	C24H42O9	GWRLDSTZVHOXAA-UHFFFAOYSA-N	81.7			Lipids and lipid-like molecules	Saccharolipids						2.07615e+06	6.28562e+06	9.27556e+06	4.73418e+06	484019	250802	263643	250159	3.4343e+06	3.2698e+06	3.26578e+06	3.33894e+06	0.0237133	474.283
MP20869	3.84	575.343	S-panganensine	[M+H]+	C37H42N4O2	JFQSZFYKIRDVHI-PGARUWHJSA-N	81.7			Alkaloids and derivatives	Strychnos alkaloids						2.90703e+07	2.42325e+07	1.77713e+07	8.12074e+06	7.81598e+06	7.68517e+06	5.70984e+06	6.8022e+06	1.34229e+07	1.33261e+07	1.35253e+07	1.35254e+07	0.00711153	574.331
MP4291	0.625	163.081	4-Methoxycinnamaldehyde	[M+CH3OH+H]+	C10H10O2	AXCXHFKZHDEKTP-NSCUHMNNSA-N	81.7	HMDB0032611	C10475	Phenylpropanoids and polyketides	Cinnamaldehydes						1.37509e+07	1.33946e+07	1.3978e+07	1.39567e+07	1.39697e+07	1.34437e+07	1.54154e+07	1.3555e+07	1.38611e+07	1.38104e+07	1.37146e+07	1.38617e+07	0.00501131	162.068
MP15330	6.521	429.317	N-{[(1S,4S,6S)-6-Isopropyl-4-{2-[(4-methoxybenzyl)amino]-2-oxoethyl}-3-methyl-2-cyclohexen-1-yl]methyl}-2,2-dimethylpropanamide	[M+Na]+	C26H40N2O3		81.7										1.0298e+07	1.11337e+07	1.06441e+07	7.66761e+06	1.01404e+07	4.21298e+07	2.74341e+07	4.11739e+07	1.83287e+07	1.77574e+07	1.79686e+07	1.77414e+07	0.0152368	428.304
MP20630	3.623	569.313	2-[4-(2-Phenyl-2-propanyl)phenoxy]acetohydrazide	[M+Na]+	C17H20N2O2		81.6										2.2563e+06	3.28188e+06	2.74727e+06	2.25994e+06	2.69112e+06	2.13503e+06	1.12893e+06	1.85465e+06	2.41099e+06	2.41107e+06	2.36945e+06	2.41113e+06	0.00866588	284.152
MP7372	7.344	230.139	3,7-dihydroxy-8-methyl-8-azabicyclo[3.2.1]octan-6-yl propanoate	[M+H]+	C11H19NO4	IDTJFYSTCXQPOP-UHFFFAOYSA-N	81.6			Alkaloids and derivatives	Tropane alkaloids						2.599e+06	2.502e+06	1.57348e+06	1.61653e+06	2.32941e+06	2.22503e+06	2.77893e+06	2.69441e+06	2.47374e+06	2.50034e+06	2.82517e+06	2.7301e+06	0.0655483	229.131
MP10298	3.742	296.206	Spirasine IV	[M+H]+	C20H25NO	AEQMMISNDMJYNF-UHFFFAOYSA-N	81.5			Lipids and lipid-like molecules	Prenol lipids	Diterpenoids					1.17465e+06	2.09292e+06	3.34767e+06	2.60033e+06	287968	282612	208938	339538	1.14455e+06	1.20348e+06	1.20359e+06	1.19247e+06	0.0237251	295.194
MP14229	5.206	398.24	[4-(Tetradecanoylamino)benzyl]phosphonic acid	[2M+NH4]+	C21H36NO4P	OUXAHVRWFHOKHY-UHFFFAOYSA-N	81.5	HMDB0246585		Benzenoids	Benzene and substituted derivatives	Anilides					1.01668e+07	1.00709e+07	7.4548e+06	9.70358e+06	9.95665e+06	1.12246e+07	1.32435e+07	1.38629e+07	2.11519e+07	2.11511e+07	2.07454e+07	2.07523e+07	0.0110978	397.238
MP11074	5.595	315.231	pregn-4-ene-3,20-dione	[M+H]+	C21H30O2	RJKFOVLPORLFTN-LEKSSAKUSA-N	81.5	HMDB0001830	C00410	Lipids and lipid-like molecules	Steroids and steroid derivatives	Pregnane steroids	Steroids; Hormones and transmitters	21-Carbon atoms; Steroid hormones	Pregnane derivatives; Progestagens		7.32119e+06	458870	6.06377e+06	5.00306e+06	2.54392e+06	61837.8	552879	4.53945e+06	3.11013e+06	3.14307e+06	3.10964e+06	3.32753e+06	0.0329289	314.225
MP22121	3.658	608.383	PEG n13	[M+NH4]+	C26H54O14	AKWFJQNBHYVIPY-UHFFFAOYSA-N	81.5										9.61089e+06	1.23814e+07	1.16984e+07	8.60855e+06	1.0327e+07	7.48185e+06	3.82764e+06	6.10674e+06	8.84021e+06	8.80495e+06	8.87815e+06	8.75301e+06	0.0060359	590.351
MP7173	1.155	226.083	Tersone G	[M+H]+	C14H11NO2	GNVOHJWIDYHOIP-UHFFFAOYSA-N	81.5			Organoheterocyclic compounds	Pyridines and derivatives	Phenylpyridines					5.13711e+06	2.54968e+06	4.93917e+06	5.78976e+06	2.92698e+06	2.11938e+06	5.11615e+06	3.8754e+06	4.05935e+06	4.02913e+06	3.98461e+06	3.99967e+06	0.00823425	225.079
MP5099	0.704	181.108	1-(2-Fluorophenyl)piperazine	[2M+Na]+	C10H13FN2	IVTZRJKKXSKXKO-UHFFFAOYSA-N	81.5										3.95701e+06	18823.8	21275	9003.67	83559.3	8847.76	3238.53	3597.24	355073	364255	370034	383188	0.0319826	180.106
MP10541	5.564	301.216	(2Z)-5-(1,2,4a,5-tetramethyl-7-oxo-1,2,3,4,4a,7,8,8a-octahydronaphthalen-1-yl)-3-methylpent-2-enoic acid	[M+H]+	C20H30O3	SLMFLTPPPXRYHP-JLHYYAGUSA-N	81.5			Lipids and lipid-like molecules	Prenol lipids	Diterpenoids					6.52473e+07	9.87749e+06	6.73083e+07	2.43647e+07	1.73386e+07	3.25371e+06	3.66517e+06	1.60254e+07	2.65759e+07	2.67178e+07	2.5871e+07	2.6713e+07	0.015276	318.219
MP13801	3.57	387.104	Irisflorentin	[M+H]+	C20H18O8	RISXUTCDCPHJFQ-UHFFFAOYSA-N	81.5		C17958	Phenylpropanoids and polyketides	Isoflavonoids	O-methylated isoflavonoids	Lipids	PK Polyketides	PK12 Flavonoids		287984	3.14779e+06	725990	415340	844332	713704	806221	148155	960404	1.04361e+06	1.0441e+06	1.01505e+06	0.0387321	386.1
MP10563	3.897	302.157	(4aR,7aS)-6-(Cyclopropylcarbonyl)-4-(3-pyridinylmethyl)hexahydropyrrolo[3,4-b][1,4]oxazin-3(2H)-one	[M+Na]+	C16H19N3O3		81.5										4.245e+06	6.89484e+06	9.73035e+06	9.28768e+06	129947	11052.9	649948	8815.1	4.1883e+06	4.23543e+06	4.18851e+06	4.32725e+06	0.0154555	301.143
MP13682	7.024	383.276	CIML C	[M+H]+	C22H38O5	VVPWCQQCLQSTPS-RNCINDFQSA-N	81.4			Lipids and lipid-like molecules	Fatty Acyls	Fatty alcohol esters					659295	629479	35352.5	543077	165755	2.42029e+06	2.76678e+06	1.1333e+07	2.33056e+06	2.33526e+06	1.92003e+06	2.24023e+06	0.0887992	382.272
MP4637	0.689	171.112	1-ethyl-2-methylnaphthalene	[M+H]+	C13H14	INUWBHWKAMVTNU-UHFFFAOYSA-N	81.3			Benzenoids	Naphthalenes						461548	528234	2.20776e+06	1.4141e+06	6.34011e+06	409556	607239	293825	1.5355e+06	1.48139e+06	1.49175e+06	1.4813e+06	0.0172365	170.11
MP6389	4.458	209.117	2-(3,5-Dimethylphenoxy)butanoic acid	[M+H]+	C12H16O3	CEMWDKOEAHBYQZ-UHFFFAOYSA-N	81.3			Benzenoids	Benzene and substituted derivatives	Phenoxyacetic acid derivatives					3.99218e+06	1.99665e+06	3.37369e+06	1.41212e+06	1.85965e+06	708482	875437	1.02163e+06	1.93988e+06	1.88685e+06	1.88678e+06	1.89215e+06	0.0135512	208.11
MP8756	3.485	260.166	Propranolol	[M+Na]+	C16H21NO2	AQHHHDLHHXJYJD-UHFFFAOYSA-N	81.3	HMDB0001849	C07407	Benzenoids	Naphthalenes						787614	1.72937e+06	675921	1.38209e+06	1.72108e+06	1.24217e+06	302028	447735	1.01131e+06	1.06926e+06	1.06902e+06	1.0502e+06	0.0259683	259.157
MP10036	5.137	289.252	Mead acid	[M+H]+	C20H34O2	UNSRRHDPHVZAHH-UHFFFAOYSA-N	81.3	HMDB0010378	C21938	Lipids and lipid-like molecules	Fatty Acyls	Fatty acids and conjugates	Lipids	FA Fatty acyls	FA01 Fatty Acids and Conjugates		4304.99	261266	269337	4121.08	915.132	3801.35	1083.15	15406.2	11455.2	111518	31102.2	3640.7	1.25361	306.256
MP21512	4.793	592.365	Destruxin B	[M+H]+	C30H49N5O7	HLRYHDDTULAZQQ-UHFFFAOYSA-N	81.3			Organic acids and derivatives	Peptidomimetics	Depsipeptides					4.64856e+06	6.95856e+06	7.86134e+06	5.56474e+06	861088	461292	597560	560695	4.07768e+06	4.01761e+06	4.0786e+06	3.86344e+06	0.0252817	591.363
MP7771	3.9	239.154	Agroclavine	[M+ACN+H]+	C16H18N2	XJOOMMHNYOJWCZ-UHFFFAOYSA-N	81.3		C09023	Alkaloids and derivatives	Ergoline and derivatives	Clavines and derivatives	Alkaloids	Alkaloids derived from tryptophan and anthranilic acid	Indole alkaloids		381584	1.19582e+06	66027.2	1.51801e+06	6.50883e+06	5.20277e+06	174449	3.21935e+06	2.54114e+06	2.54804e+06	946538	2.5473e+06	0.372589	238.147
MP4717	7.767	172.956	Bromobenzene-3,4-oxide	[M+H]+	C6H5BrO	FVTNDWDQRAAPCD-WDSKDSINSA-N	81.3	HMDB0060448	C14839	Organoheterocyclic compounds	Epoxides						5.99385e+06	2.75182e+06	6.09177e+06	2.34721e+06	2.83027e+06	6.49479e+06	3.79493e+06	3.59103e+06	5.55519e+06	5.32801e+06	5.56354e+06	5.06488e+06	0.0437878	171.952
MP3698	0.638	150.112	1,11-Diamino-3,6,9-trioxaundecane	[M+H]+	C8H20N2O3	NIQFAJBKEHPUAM-UHFFFAOYSA-N	81.3			Organic oxygen compounds	Organooxygen compounds	Ethers					271401	411405	698841	736279	1.41345e+06	392060	549605	326163	474617	474277	540851	473879	0.0678294	192.147
MP6891	3.578	220.06	8-METHOXYKYNURENIC ACID	[M+H]+	C11H9NO4	BXZSKDOPGDPDEG-UHFFFAOYSA-N	81.3	HMDB0060426	C05830	Organoheterocyclic compounds	Quinolines and derivatives	Quinoline carboxylic acids					1.3e+06	1.82692e+06	3.62765e+06	2.26443e+06	30181.6	77164.6	43616.9	22387.1	1.12399e+06	1.13363e+06	1.12873e+06	1.12396e+06	0.00409481	219.053
MP11880	5.166	335.221	2-Hydroxy-4,5',8a'-trimethyl-1'-oxo-4-vinyloctahydro-1'H-spiro[cyclopentane-1,2'-naphthalene]-5'-carboxylic acid	[M+ACN+H]+	C20H30O4	JSXYBZIRJXMIMK-UHFFFAOYSA-N	81.3			Organic oxygen compounds	Organooxygen compounds	Alcohols and polyols					1.98987e+07	1.22437e+07	1.83669e+07	1.03052e+07	1.2569e+07	3.52055e+06	3.19664e+06	8.14686e+06	1.0097e+07	1.00975e+07	1.0097e+07	1.02405e+07	0.00707038	334.214
MP7235	3.997	227.175	Leucylleucinamide	[M+ACN+H]+	C12H25N3O2		81.2										848015	2.15949e+06	1.1541e+06	1.26185e+06	2.22099e+06	1.96578e+06	1.15155e+06	2.26192e+06	1.57467e+06	1.86382e+06	1.57364e+06	1.59602e+06	0.0856917	243.195
MP4853	3.666	176.07	Gentiannine	[M+H]+	C10H9NO2	DFNZYFAJQPLJFI-UHFFFAOYSA-N	81.2			Organoheterocyclic compounds	Pyranopyridines						490689	2.63649e+06	728898	886539	2.29172e+06	1.32585e+06	658217	2.64906e+06	1.46161e+06	1.45346e+06	1.46154e+06	1.42151e+06	0.0131531	175.063
MP11254	4.728	319.226	(2Z)-3-Methyl-5-(1,2,4a,5-tetramethyl-7-oxo-1,2,3,4,4a,7,8,8a-octahydro-1-naphthalenyl)-2-pentenoic acid	[M+NH4]+	C20H30O3		81.2										1.08791e+07	2.10773e+06	5.72827e+06	2.03507e+06	2.46456e+06	738792	682732	1.55403e+06	3.40819e+06	3.39658e+06	3.32699e+06	3.40831e+06	0.0115426	318.219
MP9161	5.165	269.164	5-(sec-butyl)-2-hydroxybenzaldehyde N-phenylhydrazone	[M+H]+	C17H20N2O		81.2										2.88955e+06	4.24282e+06	4.34195e+06	2.91978e+06	697514	250429	590672	767224	2.08925e+06	2.14648e+06	2.12118e+06	2.14616e+06	0.012737	268.158
MP13873	5.628	389.126	Serantrypinone	[M+H]+	C21H16N4O4	XDRBDKVSHABELK-HQVDYNODNA-N	81.1										14766.2	177947	41527.2	58318.1	113055	603400	79578.1	194856	105198	113557	126989	134854	0.110628	388.117
MP5511	3.299	190.049	Kynurenic acid	[M+H]+	C10H7NO3	HCZHHEIFKROPDY-UHFFFAOYSA-N	81.1	HMDB0000715	C01717	Organoheterocyclic compounds	Quinolines and derivatives	Quinoline carboxylic acids					1.74472e+06	885985	882887	1.10703e+06	753976	517441	328194	302971	854436	877322	891615	866920	0.0180729	189.043
MP6756	7.267	217.104	Cephalosporolide J	[M+H]+	C10H16O5	JTOYXZZLKBAIEJ-UHFFFAOYSA-N	81.1			Organoheterocyclic compounds	Lactones						8.08081e+06	6.45105e+06	6.57688e+06	8.70783e+06	5.87142e+06	6.13092e+06	7.1144e+06	1.67109e+07	6.58902e+06	7.20467e+06	8.19498e+06	6.50884e+06	0.109271	216.1
MP3418	0.702	144.015	1,3-Thiazol-4-ylacetic acid	[M+H-H2O]+	C5H5NO2S	PISMJKGQNDOCGA-UHFFFAOYSA-N	81.1										1.31389e+06	1.00087e+06	919735	1.32845e+06	1.1279e+06	1.41003e+06	987047	1.1712e+06	1.16158e+06	1.12923e+06	1.11822e+06	1.11857e+06	0.0180532	143.004
MP10327	3.245	297.03	2-(1,3-Benzothiazol-2-yl)-3-(4-chlorophenyl)acrylonitrile	[M+Na]+	C16H9ClN2S	USFXVNGXQXIMII-FMIVXFBMSA-N	81										983488	940366	1.22957e+06	1.03272e+06	898221	697955	590554	536804	764097	844642	817949	814733	0.0414961	296.017
MP9814	3.453	284.185	[(1r,7as)-7-(hydroxymethyl)-2,3,5,7a-tetrahydro-1h-pyrrolizin-1-yl]methyl (2s)-2-hydroxy-2,3-dimethylbutanoate	[M+H]+	C15H25NO4	SGQBWHHTTFQKAN-GUTXKFCHSA-N	80.9			Alkaloids and derivatives							1.53143e+06	1.36075e+06	1.4802e+06	1.37935e+06	1.58359e+06	1.61327e+06	1.40103e+06	2.23748e+06	1.59653e+06	1.62055e+06	1.58958e+06	1.57275e+06	0.0124334	283.178
MP5775	4.252	196.071	5,6-Dihydrophenanthridin-6-one	[M+H]+	C13H9NO	RZFVLEJOHSLEFR-UHFFFAOYSA-N	80.9			Organoheterocyclic compounds	Quinolines and derivatives	Benzoquinolines					2.20029e+06	3.11295e+06	3.34626e+06	2.65199e+06	196828	156122	128030	149020	1.48633e+06	1.50076e+06	1.48634e+06	1.48987e+06	0.00458096	195.068
MP17583	4.6	491.318	6-Hydroxy-1-(hydroxymethyl)-5-{2-[(4-methoxybenzyl)amino]-2-oxoethyl}-1,4a-dimethyldecahydro-2-naphthalenyl propylcarbamate	[M+H]+	C27H42N2O6		80.9										5.67975e+07	7.87116e+07	8.56101e+07	6.14756e+07	9.84074e+06	7.2091e+06	8.55708e+06	9.73438e+06	4.45374e+07	4.45399e+07	4.42908e+07	4.42909e+07	0.00322204	490.304
MP14768	7.238	413.323	N-{[(1S,4S,6S)-4-{2-[Benzyl(methyl)amino]-2-oxoethyl}-6-isopropyl-3-methyl-2-cyclohexen-1-yl]methyl}-2,2-dimethylpropanamide	[M+Na]+	C26H40N2O2		80.9										6.28887e+06	5.46909e+06	5.35454e+06	5.9056e+06	5.33062e+06	1.032e+07	8.83951e+06	9.50088e+06	6.6731e+06	6.67294e+06	6.32992e+06	6.51613e+06	0.0249131	412.309
MP23725	3.691	652.409	PEG n14	[2M+H]+	C28H58O15	ILLKMACMBHTSHP-UHFFFAOYSA-N	80.9										6.41467e+06	7.87504e+06	7.7093e+06	5.65198e+06	6.14548e+06	4.53825e+06	2.33566e+06	3.5315e+06	5.40178e+06	5.40203e+06	5.39187e+06	5.27165e+06	0.0118564	634.378
MP22819	7.26	627.417	Ginsenoside Rh3	[M+Na]+	C36H60O7	PHLXREOMFNVWOH-ZJXXOVNONA-N	80.8	HMDB0039645		Lipids and lipid-like molecules	Prenol lipids	Triterpenoids					1.65931e+07	4.74394e+07	2.5114e+07	1.66904e+07	2.55798e+06	780134	1.06732e+06	5.43377e+06	1.23621e+07	1.5435e+07	1.48509e+07	1.63694e+07	0.116108	604.434
MP16193	5.831	453.323	(1R,2S,5S,6R,7S,10R,11S,14S,15R,16S)-2,6,11,15-tetramethyl-5,14-dipropyl-4,13,19,20-tetraoxatricyclo[14.2.1.17,10]icosane-3,12-dione	[M+H]+	C26H44O6	IWEABBUPFKGXLA-ZGDKZWFPSA-N	80.8			Organic oxygen compounds	Organooxygen compounds	Carbonyl compounds					64033.9	2.79885e+06	1.49987e+06	179283	230363	79666.3	569719	50386.9	174723	105311	541326	185823	0.779523	452.314
MP14490	3.974	405.245	(4aS,9aR)-7-[2-(2,3-Dimethoxyphenyl)ethyl]-2-(methoxyacetyl)decahydro-6H-pyrido[3,4-d]azepin-6-one	[M+Na]+	C22H32N2O5		80.8										1.43413e+07	2.32421e+07	2.65459e+07	2.14956e+07	2.16791e+06	1.75422e+06	3.12005e+06	1.92997e+06	1.25441e+07	1.25443e+07	1.23048e+07	1.24574e+07	0.00905869	404.231
MP12950	3.378	363.162	Laurentixanthone A	[M+H]+	C23H22O4	BCILHNDVVWKDBW-UHFFFAOYSA-N	80.8			Organoheterocyclic compounds	Benzopyrans	1-benzopyrans					743621	1.05605e+06	993550	731396	1.68732e+06	844599	504447	964530	875458	954835	954793	955184	0.0424997	362.152
MP11780	4.568	333.205	11-hydroxy-5,9-dimethyl-14-methylidene-15-oxotetracyclo[11.2.1.0,.0,]hexadecane-5-carboxylic acid	[M+H]+	C20H28O4		80.7										1.38364e+06	2.03013e+06	878632	1.41241e+06	296879	113076	39618.8	143296	1.38315e+06	1.52707e+06	837259	1.4384e+06	0.24052	332.199
MP22014	7.359	605.435	Ginsenoside Rk2	[M+H]+	C36H60O7	WMGBQZAELMGYNO-HGHYCVMVNA-N	80.7										1.57847e+06	2.58405e+06	2.66348e+06	1.18302e+06	103025	72491.9	258568	161253	1.2199e+06	1.06463e+06	1.04763e+06	1.29302e+06	0.10348	604.434
MP3943	0.683	155.054	Benzoylbutadiyne	[M+H]+	C11H6O	ZKQQJUBGJLUJNT-UHFFFAOYSA-N	80.6	HMDB0032945		Benzenoids	Benzene and substituted derivatives	Benzoyl derivatives					208216	297837	606529	813654	266575	225226	586224	299852	401478	447005	401538	401487	0.0551068	154.042
MP3516	1.836	146.081	trans-5-Hydroxypipecolic acid	[M+H]+	C6H11NO3	RKEYKDXXZCICFZ-CRCLSJGQSA-N	80.6			Organic acids and derivatives	Carboxylic acids and derivatives	Amino acids, peptides, and analogues					1.23376e+06	1.88422e+06	2.17918e+06	1.50609e+06	2.1445e+06	1.03233e+06	1.00999e+06	1.01373e+06	1.48837e+06	1.46809e+06	1.48829e+06	1.40433e+06	0.0272093	145.074
MP23624	7.233	649.43	pentacyclo[19.3.1.1(3,7).1(9,13).1(15,19)]octacosa-1(25),3,5,7(28),9,11,13(27),15,17,19(26),21,23-dodecaene-25,26,27,28-tetrol,5,11,17,23-tetrakis(1,1-dimethylethyl)	[M+H]+	C44H56O4	NVKLTRSBZLYZHK-UHFFFAOYSA-N	80.5			Benzenoids							9.96862e+06	5.79835e+07	6.46627e+07	1.65779e+07	2.60422e+06	885732	3.25759e+06	2.75364e+06	2.39292e+07	2.44237e+07	1.009e+07	2.44134e+07	0.34211	648.418
MP23763	7.288	653.45	8,14,17-trihydroxy-6,9,18-triisopropyl-4-methyl-3,12-bis(2-methylpropyl)-15-(sec-butyl)-1,10-dioxa-4,7,13,16-tetraazacyclooctadeca-7,13,16-triene-2,5,11-trione	[M+H]+	C34H60N4O8	DLSXAPYFZQNLPN-UHFFFAOYSA-N	80.5			Organic acids and derivatives	Peptidomimetics	Depsipeptides					5.64882e+06	3.1953e+06	7.83769e+06	2.9865e+06	586095	49638.7	167769	275320	3.57061e+06	3.56349e+06	2.47842e+06	3.59047e+06	0.166125	652.441
MP5856	1.155	198.052	74XI8247P0	[M+NH4]+	C11H13NO3S	CICOZWHZVMOPJS-JTQLQIEISA-N	80.4										1.66847e+06	944954	1.68028e+06	1.98911e+06	975789	707332	1.66644e+06	1.29141e+06	1.29404e+06	1.30095e+06	1.29679e+06	1.29405e+06	0.00251722	239.062
MP8767	4.556	260.258	Pentadecanoic Acid	[M+H]+	C15H30O2	WQEPLUUGTLDZJY-UHFFFAOYSA-N	80.3	HMDB0000826	C16537	Lipids and lipid-like molecules	Fatty Acyls	Fatty acids and conjugates	Lipids	FA Fatty acyls	FA01 Fatty Acids and Conjugates		2.77939e+07	4.41027e+07	2.36347e+07	3.37364e+07	3.92008e+07	1.52192e+07	1.7981e+06	4.12856e+06	2.39467e+07	2.39465e+07	2.37825e+07	2.39325e+07	0.00334527	242.225
MP8717	5.34	259.169	8-ethoxy-3,4,5-trimethyl-5H,6H,7H,8H-naphtho[2,3-b]furan	[M+H]+	C17H22O2	JVIQHIOFHODENX-UHFFFAOYSA-N	80.3			Lipids and lipid-like molecules	Prenol lipids	Sesquiterpenoids					9.78639e+06	2.64066e+06	5.26417e+06	1.28684e+06	2.42863e+06	647442	513347	2.50859e+06	3.18438e+06	3.1389e+06	3.1389e+06	3.14912e+06	0.00684561	258.162
MP23623	5.091	649.412	methyl (1R,12S,14R,15S)-15-ethyl-12-[(1R,15R,17S,18S)-17-ethyl-7-methoxy-3,13-diazapentacyclo[13.3.1.02,10.04,9.013,18]nonadeca-2(10),4,6,8-tetraen-6-yl]-17-methyl-10,17-diazatetracyclo[12.3.1.03,11.04,9]octadeca-3(11),4,6,8-tetraene-18-carboxylate	[M+H]+	C41H52N4O3	AJOVGXUNQMGDIO-GOAITGNXSA-N	80.3			Alkaloids and derivatives	Ibogan-type alkaloids						3.99821e+06	9.92679e+06	1.0171e+07	6.26452e+06	1.32206e+06	485970	1.20276e+06	674364	5.28318e+06	5.03364e+06	5.00078e+06	5.08395e+06	0.0248156	648.404
MP14385	5.575	402.289	Myriocin	[M+2H]2+	C21H39NO6	ZZIKIHCNFWXKDY-GNTQXERDSA-N	80.3		C19914	Lipids and lipid-like molecules	Fatty Acyls	Fatty acids and conjugates	Lipids	FA Fatty acyls; SP Sphingolipids	FA01 Fatty Acids and Conjugates; SP01 Sphingoid bases		1.08488e+07	2.24492e+07	2.32507e+07	1.47275e+07	2.02265e+06	1.26282e+06	2.43709e+06	2.13013e+06	1.05249e+07	1.06289e+07	1.02394e+07	1.06275e+07	0.0174939	401.278
MP14406	4.385	403.229	Oblongifoliagarcinine D	[M+H]+	C27H30O3	ALXVGKQZPCQVFB-UHFFFAOYSA-N	80.3			Organoheterocyclic compounds	Benzopyrans	1-benzopyrans					1.12956e+07	1.76617e+07	2.49279e+07	1.43547e+07	2.33583e+06	1.4202e+06	1.53559e+06	1.6864e+06	1.01822e+07	1.00924e+07	1.01612e+07	1.01821e+07	0.00418841	402.219
MP2627	7.091	124.087	1-[(4-Bromo-3,5-dimethyl-1H-pyrazol-1-yl)methyl]-3,5-dimethyl-1H-pyrazol-4-amine	[M+H]+	C11H16BrN5		80.3										2.23193e+07	2.06405e+07	1.98766e+07	1.73597e+07	1.14689e+07	17524.1	3.83442e+07	3.4033e+07	79054.6	1.77129e+07	1.87656e+07	159089	1.14069	297.059
MP4460	7.449	167.012	vanitiolide	[M+H-H2O]+	C12H15NO3S	WQYRHRAZNNRDIA-UHFFFAOYSA-N	80.3										4.18933e+07	4.05056e+07	4.02726e+07	4.12827e+07	4.11811e+07	4.11235e+07	4.23419e+07	4.06787e+07	4.16729e+07	4.16718e+07	4.13901e+07	4.13895e+07	0.00392817	253.077
MP18216	6.421	507.271	Methyl (2R,4S,6S,12bR)-4-(4-fluorophenyl)-2-{[2-(4-morpholinyl)ethyl]amino}-1,2,3,4,6,7,12,12b-octahydroindolo[2,3-a]quinolizine-6-carboxylate	[M+Na]+	C29H35FN4O3		80.3										2.79017e+07	1.89185e+07	2.53627e+07	1.69574e+07	1.70825e+07	3.36571e+07	1.82024e+07	3.41642e+07	1.982e+07	1.98744e+07	1.84573e+07	1.78157e+07	0.0538141	506.269
MP9744	6.994	282.278	D-Sphingosine	[M+H]+	C18H37NO2	WWUZIQQURGPMPG-CCEZHUSRSA-N	80.3	HMDB0000252	C00319	Organic nitrogen compounds	Organonitrogen compounds	Amines	Lipids	SP Sphingolipids	SP01 Sphingoid bases		9.94714e+06	5.72718e+06	1.12064e+07	1.26756e+07	6.96907e+06	1.0886e+07	6.89094e+06	2.82899e+07	1.48977e+07	1.43283e+07	1.4203e+07	1.45693e+07	0.0210925	299.282
MP10535	5.217	301.216	(5Z,9E,11Z,14Z,17Z)-8-Hydroxy-5,9,11,14,17-icosapentaenoic acid	[M+CH3OH+H]+	C20H30O3		80.3										2.79695e+07	4.86815e+06	1.33047e+07	6.81202e+06	1.17359e+07	2.07727e+06	1.39434e+06	8.74904e+06	9.63417e+06	9.61266e+06	9.54502e+06	9.63404e+06	0.0043927	318.219
MP7770	3.163	239.15	C8E5	[M+Na]+	C18H38O6	MJELOWOAIAAUJT-UHFFFAOYSA-N	80.3			Organic oxygen compounds	Organooxygen compounds	Ethers					5.22467e+06	7.49174e+06	8.41555e+06	7.17621e+06	1.17338e+06	956256	1.01671e+06	1.84447e+06	3.70534e+06	3.77983e+06	4.09762e+06	3.70613e+06	0.0488944	350.267
MP4632	3.322	171.065	afritoxinone A	[M+H]+	C8H10O4	JAZGQWJNJDFLTE-LPBLVHEISA-N	80.2			Organoheterocyclic compounds	Furopyrans						113953	33323.2	718814	625638	2.44475e+06	72757.2	42074.1	15337	571663	660282	615761	597873	0.0609829	170.058
MP4950	4.419	178.099	Nitrosonornicotine	[M+Na]+	C9H11N3O	XKABJYQDMJTNGQ-UHFFFAOYSA-N	80.2	HMDB0041940	C16452	Organoheterocyclic compounds	Pyridines and derivatives	Pyrrolidinylpyridines					534547	653750	1.66945e+06	1.887e+06	611760	1.38795e+06	711217	2.91326e+06	1.30303e+06	1.29381e+06	1.31704e+06	1.30622e+06	0.00734314	177.09
MP11432	5.599	324.195	Carbazoquinocin D	[M+H]+	C21H25NO2	KDTAIOIWWSESBU-UHFFFAOYSA-N	80.2			Organoheterocyclic compounds	Indoles and derivatives	Carbazoles					581799	126733	1.84911e+06	222170	3.34266e+06	4.4667e+06	6.10686e+06	4.23792e+06	389828	1.94003e+06	1.95391e+06	1.94256e+06	0.499723	323.189
MP11785	4.45	333.274	Arachidonic acid ethyl ester	[M+H-H2O]+	C22H36O2	SNXPWYFWAZVIAU-OKEQBMBXSA-N	80.2	HMDB0062725		Lipids and lipid-like molecules	Fatty Acyls	Fatty acid esters					2.63842e+06	4.43835e+06	1.51529e+06	4.42747e+06	3.63819e+06	277466	14199.5	66173.8	2.11001e+06	2.11006e+06	2.0798e+06	2.06718e+06	0.0103831	332.272
MP5958	1.057	200.089	Fusatin	[M+H]+	C10H9N5	BCVQNVIMHTYJMD-UHFFFAOYSA-N	80.2			Organoheterocyclic compounds	Imidazopyrimidines	Purines and purine derivatives					540656	1.06385e+06	1.05238e+06	803641	2.45789e+06	696509	314738	232572	794721	795524	787039	791975	0.00483558	199.086
MP9605	3.255	279.133	N1-(alpha-D-ribosyl)-5,6-dimethyl-benzimidazole	[M+H]+	C14H18N2O4	HLRUKOJSWOKCPP-RYSNWHEDSA-N	80.2	HMDB0011112	C05775	Nucleosides, nucleotides, and analogues	Benzimidazole ribonucleosides and ribonucleotides						436124	710719	733797	478260	503612	474647	450624	487403	529362	535927	536560	517276	0.0168928	278.127
MP7632	6.024	236.164	N-Isopropylmethoxamine	[M+H]+	C14H23NO3	YZXKGCIDSYWQIV-UHFFFAOYSA-N	80.1			Benzenoids	Benzene and substituted derivatives	Methoxybenzenes					1.84655e+07	1.63806e+07	1.97263e+07	2.91661e+07	1.93607e+07	2.61987e+07	1.3151e+07	1.79972e+07	1.98655e+07	1.9864e+07	1.91049e+07	1.9701e+07	0.018386	253.168
MP16195	3.687	453.342	4,5,9,9,13,19,20-heptamethyl-24-oxahexacyclo[15.5.2.0,.0,.0,.0,]tetracos-15-ene-10,23-dione	[M+H]+	C30H44O3		80.1										9.9839e+06	1.25376e+07	3.38451e+07	1.06352e+07	8.99415e+06	6.75624e+06	6.79026e+06	9.62927e+06	1.24599e+07	1.24099e+07	1.24597e+07	1.22498e+07	0.0080279	452.329
MP9820	3.511	284.206	Levallorphan	[M+NH4]+	C19H25NO	OZYUPQUCAUTOBP-QXAKKESOSA-N	80.1	HMDB0014647	C07069	Alkaloids and derivatives	Morphinans						1.96967e+06	2.83379e+06	3.53319e+06	3.38547e+06	520334	569837	460938	483428	1.58691e+06	1.60605e+06	1.64961e+06	1.5864e+06	0.0184721	283.194
MP1630	0.69	99.0914	1H-Imidazole 4,5-Dihydro-2,4-Dimethyl	[M+H]+	C5H10N2	DIHAURBCYGTGCV-UHFFFAOYSA-N	80.1			Organoheterocyclic compounds	Imidolactams						2.23156e+06	501200	884234	5.94557e+06	395272	376821	605754	364943	1.37931e+06	1.48495e+06	1.37914e+06	1.39701e+06	0.035881	98.0844
MP23436	6.132	644.471	C-12 NBD-dihydro-ceramide	[M+Na]+	C36H63N5O6	STPDREBSVHTICB-CQTOTRCISA-N	80			Lipids and lipid-like molecules	Sphingolipids	Ceramides					3.85123e+06	5.25418e+06	5.92459e+06	1.34468e+06	72688.2	5.10158e+06	9.61448e+06	1.69237e+07	2.06295e+06	1.95727e+06	2.24484e+06	2.21088e+06	0.0630655	661.478
MP10387	6.316	298.273	Lepadin D	[M+H]+	C18H35NO2	LNSIIDDYOVTXHK-YQZYXFPUSA-N	80			Organoheterocyclic compounds	Quinolidines						2.69543e+06	2.95449e+06	2.79403e+06	3.09615e+06	4.94315e+06	9.93282e+06	8.24192e+06	9.36304e+06	5.07186e+06	4.96455e+06	5.03595e+06	5.16786e+06	0.0167163	297.267
MP1715	7.172	101.071	NPYR	[M+CH3OH+H]+	C4H8N2O	WNYADZVDBIBLJJ-UHFFFAOYSA-N	80			Organoheterocyclic compounds	Pyrrolidines						1.09486e+08	4.93953e+07	8.82658e+07	2.20168e+08	1.85789e+08	1.64328e+08	7.28718e+07	2.10076e+08	2.09186e+08	2.09058e+08	2.09287e+08	2.21926e+08	0.0300201	100.064
MP17506	6.172	489.352	cimigenol	[M+H]+	C30H48O5	CNBHUROFMYCHGI-IEUUZZHOSA-N	80		C17538	Lipids and lipid-like molecules	Steroids and steroid derivatives	Cycloartanols and derivatives	Lipids	ST Sterol lipids	ST01 Sterols		1.48256e+07	1.88475e+07	2.07481e+07	1.90532e+07	2.11025e+06	904700	2.15723e+06	3.55584e+06	1.3057e+07	1.3037e+07	1.00449e+07	1.31752e+07	0.123586	488.35
MP1527	7.232	97.0757	2,4-dimethyl-3h-imidazole	[M+H]+	C5H8N2	LLPKQRMDOFYSGZ-UHFFFAOYSA-N	80			Organoheterocyclic compounds	Azoles	Imidazoles					1.05249e+06	707493	1.06304e+06	1.25426e+06	1.23414e+06	1.10315e+06	947514	1.0925e+06	1.05744e+06	1.05129e+06	951221	910136	0.0739501	96.0687
MP13379	6.823	374.302	(1-{14-methoxy-7,11-dimethyl-5-oxapentacyclo[8.8.0.0,.0,.0,]octadec-16-en-6-yl}ethyl)dimethylamine	[M+H]+	C24H39NO2		80										767066	341486	351570	112923	36823.8	123379	1.86036e+06	1.62301e+06	4.70593e+06	4.07209e+06	3.89973e+06	3.79756e+06	0.0989276	373.298
MP5514	7.33	190.097	6-Fluoro-2,3,4,9-tetrahydro-1H-carbazole	[M+H]+	C12H12FN	HSQOAURZPIFPOL-UHFFFAOYSA-N	80										4.29329e+06	5.45143e+06	3.2281e+06	3.20357e+06	3.91065e+06	3.42453e+06	2.88992e+06	3.68175e+06	2.83509e+06	3.24698e+06	3.1569e+06	3.60068e+06	0.0980851	189.095
MP19179	3.808	531.317	Diheteropeptin	[M+H]+	C28H42N4O6	NAOMMKDKLCMCHA-YDXQKAQTSA-N	80			Organic acids and derivatives	Carboxylic acids and derivatives	Amino acids, peptides, and analogues					2.13468e+07	1.75232e+07	1.34695e+07	5.97481e+06	5.96064e+06	5.52288e+06	4.31899e+06	4.88706e+06	9.98445e+06	9.78352e+06	9.98429e+06	9.98333e+06	0.010092	530.31
MP21094	4.698	581.303	Isocucurbitacin B	[M+Na]+	C32H46O8	WTBZNVRBNJWSPF-DZEACCAPSA-N	79.9			Lipids and lipid-like molecules	Steroids and steroid derivatives	Cucurbitacins					1.18834e+07	1.76242e+07	1.93592e+07	1.15105e+07	2.40506e+06	1.31077e+06	1.80723e+06	1.63983e+06	7.88057e+06	8.10102e+06	8.5014e+06	7.89605e+06	0.035716	558.319
MP11258	5.196	319.226	steviol	[M+H-H2O]+	C20H30O3	QFVOYBUQQBFCRH-KMIJAHQMNA-N	79.9	HMDB0036706	C20212	Lipids and lipid-like molecules	Prenol lipids	Diterpenoids	Lipids	PR Prenol lipids	PR01 Isoprenoids		7.1812e+06	1.72188e+06	1.30272e+06	218750	555575	1.07031e+06	991032	1.09916e+06	1.62023e+06	1.61835e+06	1.27826e+06	1.2538e+06	0.141544	318.219
MP21483	4.889	591.37	Panganensine X	[M+H]+	C38H46N4O2	GJYRKYFELCXWRD-WIXLWLJMNA-N	79.9										4.06522e+06	1.05358e+07	1.19676e+07	7.21702e+06	1.36623e+06	428188	1.00601e+06	1.13136e+06	5.57063e+06	5.57314e+06	5.54649e+06	5.26358e+06	0.0274026	590.362
MP6758	2.26	217.104	(4S,5S,8S,10R)-4,5,8-trihydroxy-10-methyl-3,4,5,8,9,10-hexahydro-2H-oxecin-2-one	[M+Na]+	C10H16O5		79.9										1.3733e+07	1.75348e+07	1.53652e+07	1.80016e+07	1.80654e+07	1.7648e+07	9.91122e+06	1.28584e+07	1.43697e+07	1.44987e+07	1.43071e+07	1.50202e+07	0.0222806	216.1
MP11920	5.525	336.252	oxeladin	[M+H]+	C20H33NO3	IQADUMSPOQKAAO-UHFFFAOYSA-N	79.9			Benzenoids	Benzene and substituted derivatives	Phenylpropanes					3.13268e+06	3.50257e+06	8.37953e+06	9.67167e+06	1.25363e+07	2.02426e+06	3.05534e+06	3.33014e+06	5.78759e+06	5.75789e+06	5.62274e+06	5.82325e+06	0.0152392	335.246
MP11998	4.321	338.222	1-{3-[(2r)-1-(1h-indol-3-ylmethyl)piperidin-2-yl]-5,6-dihydro-4h-pyridin-1-yl}ethanone	[M+H]+	C21H27N3O	YRVWJJHMGFKSBV-OAQYLSRUSA-N	79.9			Organoheterocyclic compounds	Indoles and derivatives	Indoles					1.56398e+06	5.18973e+06	2.18569e+06	1.83848e+06	2.59033e+06	1.10378e+06	878554	618240	2.0667e+06	2.06667e+06	2.0468e+06	1.97611e+06	0.0210913	337.215
MP5702	7.308	194.117	methoxyphedrine	[M+CH3OH+H]+	C11H15NO2	MQUIHBQDYYAEMH-UHFFFAOYSA-N	79.8	HMDB0243795		Organic oxygen compounds	Organooxygen compounds	Carbonyl compounds					5.8662e+06	1.46368e+07	3.69289e+06	7.44102e+06	7.47913e+06	4.91377e+06	1.04419e+07	5.09436e+06	5.9571e+06	6.943e+06	7.00801e+06	5.97005e+06	0.090403	193.11
MP11709	5.877	331.226	(1R,10R,13R,15S)-9,9,13-trimethyl-5-pentyl-8,14-dioxatetracyclo[8.5.0.02,7.013,15]pentadeca-2,4,6-trien-3-ol	[M+H]+	C21H30O3	BFZHCUBIASXHPK-ATWVFEABSA-N	79.8			Lipids and lipid-like molecules	Steroids and steroid derivatives	Pregnane steroids					9.60755e+06	1.75455e+06	7.52912e+06	4.54085e+06	4.22649e+06	354011	1.48234e+06	4.67729e+06	4.39023e+06	4.50327e+06	4.4714e+06	4.50315e+06	0.0119406	330.219
MP20907	7.204	576.383	Isorubijervosine	[M+H]+	C33H53NO7	PELDOJNAKPMYLQ-UHFFFAOYNA-N	79.8										1.55719e+07	1.8532e+07	9.23896e+06	1.40727e+07	1.77161e+06	586282	1.47109e+06	2.34249e+06	1.39775e+07	1.4201e+07	1.79272e+07	1.41486e+07	0.126895	575.382
MP11746	5.722	332.258	Asperidine C	[M+H]+	C21H33NO2	ZEKACHFYLSYPOC-UHFFFAOYSA-N	79.8			Organoheterocyclic compounds	Azolidines	Isoxazolidines					3.90739e+06	5.16798e+06	6.64968e+06	4.04432e+06	1.0893e+07	6.43986e+06	5.68358e+06	5.82409e+06	6.08343e+06	6.09781e+06	5.95029e+06	6.22152e+06	0.0182187	331.251
MP24803	4.751	681.438	6,9-dimethyl (6r,9r)-10-[2-(3-ethylpiperidin-1-yl)ethyl]-6-{3-[2-(3-ethylpiperidin-1-yl)ethyl]-1h-indol-2-yl}-7h,8h,9h-pyrido[1,2-a]indole-6,9-dicarboxylate	[M+H]+	C42H56N4O4	HWBGBIQGALATDY-OIVLGYHJSA-N	79.8			Organoheterocyclic compounds	Indoles and derivatives	Tryptamines and derivatives					8.8514e+06	1.18957e+07	1.29399e+07	8.89805e+06	1.81699e+06	583584	2.0089e+06	1.58484e+06	6.94296e+06	6.86481e+06	6.94574e+06	6.44992e+06	0.0348407	680.43
MP10982	5.93	313.234	Seimatopolide B	[M+H]+	C18H32O4	XPIVIEHYRXZHSQ-XBOZFJKOSA-N	79.8										1.99504e+07	1.80454e+07	1.80409e+07	2.09757e+07	2.68785e+07	3.19063e+07	2.58577e+07	2.65823e+07	2.3622e+07	2.36193e+07	2.33569e+07	2.33524e+07	0.00653788	312.23
MP2249	0.827	114.055	AC-ALA-OME	[M+H-H2O]+	C6H11NO3	FQGVVDYNRHNTCK-BYPYZUCNSA-N	79.8			Organic acids and derivatives	Carboxylic acids and derivatives	Amino acids, peptides, and analogues					938169	1.02778e+06	142507	115797	828370	171118	158798	203438	357482	208742	247147	226626	0.257138	145.074
MP10930	4.269	312.141	N-(2-Furylmethyl)-3-{[5-(2-pyridinyl)-1,2-oxazol-3-yl]methyl}-3-oxetanamine	[M+CH3OH+H]+	C17H17N3O3		79.7										1.31721e+06	1.80879e+06	2.01677e+06	1.49469e+06	2.38818e+06	1.0264e+06	956427	876156	1.51315e+06	1.50467e+06	1.50467e+06	1.5063e+06	0.00268099	311.127
MP7911	6.268	242.247	6-Acetamidotridecane	[M+H]+	C15H31NO	RMTOFKWPCZJSGD-UHFFFAOYSA-N	79.7			Organic acids and derivatives	Carboxylic acids and derivatives	Carboxylic acid derivatives					6.49033e+06	6.36032e+06	5.43463e+06	6.03372e+06	7.76565e+06	9.51755e+06	6.8147e+06	9.56539e+06	7.23486e+06	7.23488e+06	7.23473e+06	7.42789e+06	0.0132545	241.241
MP11593	3.466	328.14	Tetrahydroindol 5	[M+H]+	C16H17N5O3	HIODDSQIKRMOBZ-FBIMIBRVSA-N	79.6			Organoheterocyclic compounds	Imidazopyrimidines	Purines and purine derivatives					1.18651e+06	2.55965e+06	2.40072e+06	1.81418e+06	168023	72569.6	80032.6	98697.7	1.03462e+06	1.07687e+06	1.04295e+06	1.03492e+06	0.0191511	327.133
MP5917	3.328	199.144	guaiazulene	[M+H]+	C15H18	FWKQNCXZGNBPFD-UHFFFAOYSA-N	79.6	HMDB0036648	C09675	Lipids and lipid-like molecules	Prenol lipids	Sesquiterpenoids	Lipids	PR Prenol lipids	PR01 Isoprenoids		435703	1.60746e+06	193944	78391.1	1.00462e+06	686493	183192	1.43565e+06	757364	735253	729086	698610	0.0332002	198.141
MP9363	5.617	273.253	Tsukubadiene	[M+H]+	C20H32	JZGOFJIAHJJJDK-LYNZBNEBSA-N	79.6		C21670	Hydrocarbons	Unsaturated hydrocarbons	Branched unsaturated hydrocarbons					2.32059e+06	2.23446e+06	1.61413e+06	2.52571e+06	2.66471e+06	6.09932e+06	3.90496e+06	5.3487e+06	3.42523e+06	3.4036e+06	3.34201e+06	3.42508e+06	0.0115662	272.25
MP18940	3.583	525.287	Okaramine L	[M+H]+	C32H36N4O3	IILJSEXGGMGEMF-UHFFFAOYSA-N	79.6			Organoheterocyclic compounds	Indoles and derivatives	Pyrroloindoles					3.04639e+06	4.35166e+06	3.73643e+06	2.75899e+06	3.8947e+06	3.22189e+06	1.71436e+06	2.76052e+06	3.35757e+06	3.38112e+06	3.33223e+06	3.38108e+06	0.00693515	524.279
MP17081	3.845	478.264	Epothilone C	[M+H]+	C26H39NO5S	BEFZAMRWPCMWFJ-QJKGZULSSA-N	79.5	HMDB0251875	C15694	Phenylpropanoids and polyketides	Macrolides and analogues	Epothilones and analogues	Lipids	PK Polyketides	PK04 Macrolides and lactone polyketides; PK14 Non-ribosomal peptide/polyketide hybrids		192345	251397	211195	85117	126771	272328	203307	545452	175324	201005	337213	171770	0.353987	477.255
MP13020	4.121	365.158	8,9-dihydroxy-9-(hydroxymethyl)-3,6-dimethylidene-2-oxo-octahydroazuleno[4,5-b]furan-4-yl 2-methylprop-2-enoate	[M+H]+	C19H24O7	NJTYUJFKRSBELS-UHFFFAOYSA-N	79.4			Lipids and lipid-like molecules	Prenol lipids	Terpene lactones					439612	845830	884412	3.24229e+06	319878	455929	3.17371e+06	254706	1.27886e+06	1.23925e+06	1.23928e+06	1.2536e+06	0.0149062	364.152
MP10611	6.751	303.231	5-(1,2,4a,5-tetramethyl-7-oxo-1,2,3,4,4a,7,8,8a-octahydronaphthalen-1-yl)-3-methylpentanoic acid	[M+H]+	C20H32O3	RNWHJFUXZQBBLK-UHFFFAOYSA-N	79.3			Lipids and lipid-like molecules	Prenol lipids	Diterpenoids					1.18594e+08	1.5459e+07	8.56674e+07	1.59921e+07	2.07803e+07	2.28055e+06	1.71057e+06	1.36536e+07	3.99387e+07	4.13922e+07	4.01537e+07	4.05633e+07	0.015834	320.235
MP4206	0.625	161.084	1(2h)-phthalazinone hydrazone	[M+H]+	C8H8N4	RPTUSVTUFVMDQK-UHFFFAOYSA-N	79.3			Organoheterocyclic compounds	Diazanaphthalenes	Benzodiazines					4.23496e+07	4.28565e+07	4.49993e+07	4.43752e+07	4.35915e+07	4.26287e+07	4.90029e+07	4.22666e+07	4.34834e+07	4.31959e+07	4.30531e+07	4.33594e+07	0.00434477	160.075
MP12811	5.154	359.182	8-(4-hydroxy-3-methoxyphenyl)-1,3-dimethoxy-6,7-dimethyl-5,6,7,8-tetrahydronaphthalen-2-ol	[M+H]+	C21H26O5	VEFZLUCJNOJAGR-UHFFFAOYSA-N	79.3			Lignans, neolignans and related compounds	Aryltetralin lignans						1.29616e+06	839105	774378	990094	1.61682e+06	3.21135e+06	2.10123e+06	2.4873e+06	1.79743e+06	1.79703e+06	1.69573e+06	1.73504e+06	0.0284147	358.178
MP7188	4.469	226.18	hexahydro-1h-pyrrolizin-1-ylmethyl 2-methylbutanoate	[M+H]+	C13H23NO2	GZYSVGWNLDGWPZ-UHFFFAOYSA-N	79.2			Organoheterocyclic compounds	Pyrrolizidines						1.06865e+07	1.3731e+07	1.6679e+07	2.235e+08	1.6849e+07	2.13184e+07	1.33131e+07	8.63445e+07	5.3174e+07	5.3056e+07	5.27406e+07	5.37255e+07	0.00772266	225.173
MP3294	3.44	141.091	4-(Oxiran-2-Yl)-7-Oxabicyclo[4.1.0]Heptane	[M+H]+	C8H12O2	OECTYKWYRCHAKR-UHFFFAOYSA-N	79.2			Organoheterocyclic compounds	Oxepanes						730966	2.03785e+06	1.01316e+06	647858	1.14918e+06	1.78108e+06	684949	174233	632483	840833	839603	841600	0.132002	140.084
MP9526	5.34	277.179	(4r,5s,8s,8ar)-3,8-dimethyl-2-oxo-5-(prop-1-en-2-yl)-4,5,6,7,8,8a-hexahydro-1h-azulen-4-yl acetate	[M+H]+	C17H24O3	VVQBDBJUDRAIIN-IHQJAULKSA-N	79.2			Lipids and lipid-like molecules	Prenol lipids	Sesquiterpenoids					1.62733e+07	4.02504e+06	8.53852e+06	2.15058e+06	3.8944e+06	1.26326e+06	885148	3.88396e+06	5.07848e+06	5.07869e+06	5.10067e+06	5.16791e+06	0.00828031	276.173
MP7900	3.667	242.153	Rk-270A	[M+H]+	C16H19NO	DXUIVKIVTFTDKE-UHFFFAOYSA-N	79.2			Organoheterocyclic compounds	Indoles and derivatives	Indolines					3.90678e+07	7.86724e+07	9.3539e+07	6.54976e+07	1.13239e+08	7.87561e+07	5.97541e+07	7.658e+07	7.55771e+07	7.52221e+07	7.49871e+07	7.49878e+07	0.00370545	241.147
MP10189	3.17	293.19	N-(Methoxycarbonyl)angustifoline	[M+H]+	C16H24N2O3	SNVJEHVKQNQUBG-OWXAYAFWNA-N	79.2										9.4764e+06	7.96806e+06	7.9703e+06	9.80752e+06	1.35751e+07	9.06583e+06	1.14518e+07	1.24109e+07	8.75852e+06	8.70297e+06	8.67308e+06	8.6731e+06	0.00462865	292.179
MP2799	0.941	129.052	4,5-DIMETHYL-1H-IMIDAZOLE-2-THIOL	[M+ACN+H]+	C5H8N2S	RJZVFQDMZHOHKT-UHFFFAOYSA-N	79.1										1.49813e+06	1.62707e+06	3.13271e+06	3.06933e+06	1.64939e+06	1.90381e+06	3.02169e+06	1.56486e+06	2.29064e+06	2.3242e+06	2.29068e+06	2.29811e+06	0.00691846	128.041
MP7088	5.373	224.164	Tigloidin	[M+H]+	C13H21NO2	UVHGSMZRSVGWDJ-UHFFFAOYSA-N	79.1			Alkaloids and derivatives	Tropane alkaloids						18680.3	13329.8	243034	19595.4	499943	1.46267e+06	1.8794e+06	1.7177e+06	714203	712544	742046	732620	0.0198164	223.157
MP6121	1.156	203.008	1-(Bromoethynyl)cyclohexanol	[M+Na]+	C8H11BrO	SNMGSXAAVQCPGL-UHFFFAOYSA-N	79.1										2.46651e+06	1.13242e+06	2.49275e+06	3.55913e+06	1.77551e+06	1.45509e+06	3.50885e+06	2.50666e+06	2.50762e+06	2.49232e+06	2.50349e+06	2.50765e+06	0.00289067	201.999
MP18573	5.599	516.346	9-benzyl-5,8,11-trihydroxy-6-methyl-13-octyl-3-(sec-butyl)-1-oxa-4,7,10-triazacyclotrideca-4,7,10-trien-2-one	[M+H]+	C29H45N3O5	GGMZKYBWOCEFFP-UHFFFAOYSA-N	79.1			Organic acids and derivatives	Peptidomimetics	Depsipeptides					1.99613e+06	2.53157e+06	5.32585e+06	1.24394e+06	6.29235e+06	973055	435555	260339	2.13581e+06	2.07303e+06	2.06519e+06	2.06619e+06	0.0163148	515.336
MP18798	4.41	522.277	Aconine	[M+Na]+	C25H41NO9	SQMGCPHFHQGPIF-ZWGPATBTSA-N	79	HMDB0247960	C19990	Lipids and lipid-like molecules	Prenol lipids	Diterpenoids	Alkaloids	Alkaloids derived by amination reactions	Terpenoid alkaloids		1.03106e+07	1.42165e+07	1.22277e+07	7.786e+06	1.7316e+06	1.23559e+06	810869	1.62843e+06	6.50771e+06	6.37776e+06	6.26761e+06	6.42506e+06	0.0156728	499.278
MP6345	3.166	208.071	3-(3-Oxo[1,2,4]triazolo[4,3-a]pyridin-2(3H)-yl)propanoic acid	[M+Na]+	C9H9N3O3		79										549642	842998	1.01295e+06	831451	74212.3	51123.1	65936.8	61206.1	443765	439138	449560	460068	0.0201443	207.064
MP17541	4.607	490.297	Pyrrospirone D	[M+H]+	C31H39NO4	OCUONUXNKYDHKY-PZBKSWHFSA-N	79			Lipids and lipid-like molecules	Fatty Acyls	Eicosanoids					7.85096e+06	1.11854e+07	1.38161e+07	9.94741e+06	1.21337e+06	905178	1.03011e+06	1.1331e+06	6.25703e+06	6.3184e+06	6.33347e+06	6.31735e+06	0.0053646	489.288
MP4821	4.812	175.148	1,1,5,6-Tetramethylindane	[M+H]+	C13H18	SOVJMXNIZUPIFE-UHFFFAOYSA-N	79			Benzenoids	Indanes						252304	108420	241044	2.1139e+06	418685	651279	541080	3.4463e+06	1.12203e+06	1.10559e+06	1.10529e+06	1.14179e+06	0.0154489	174.141
MP8119	4.908	246.27	Caldopentamine	[M+H]+	C12H31N5	BELZJFWUNQWBES-UHFFFAOYSA-N	78.9		C21100	Organic nitrogen compounds	Organonitrogen compounds	Amines					267674	94972.2	334732	179481	226608	306842	356521	193015	87639.6	244517	228642	84260.2	0.540838	245.258
MP10981	5.695	313.216	(5S)-17-hydroxy-10,13-dimethyltetradecahydro-1H-cyclopenta[a]phenanthren-3(2H)-one	[M+Na]+	C19H30O2	NVKAWKQGWWIWPM-UWWKKLJASA-N	78.9			Lipids and lipid-like molecules	Steroids and steroid derivatives	Androstane steroids					4.55096e+06	19675	196137	627165	528157	12070	281374	103362	684905	721268	684766	693092	0.0248336	290.225
MP23349	3.881	641.383	Guineamide C	[M+H]+	C35H52N4O7	LTQSSFDXKQDYDB-UHFFFAOYSA-N	78.8			Organoheterocyclic compounds	Lactams	Beta lactams					2.61537e+07	2.05286e+07	1.52824e+07	6.75006e+06	7.32472e+06	6.35029e+06	4.65403e+06	6.19786e+06	1.15577e+07	1.15581e+07	1.16784e+07	1.20362e+07	0.019331	640.384
MP4115	3.101	158.961	Fosfonochlorin	[M+H]+	C2H4ClO4P	WNRQTPHCNDLIOO-UHFFFAOYSA-N	78.8			Organic acids and derivatives	Organic phosphonic acids and derivatives	Organic phosphonic acids					1.74125e+07	1.19069e+07	2.03691e+07	1.95848e+07	5.74148e+06	2.61056e+07	1.35536e+07	3.41757e+07	3.30251e+07	3.46341e+07	3.3775e+07	3.186e+07	0.0353055	157.954
MP6718	4.581	216.159	Ethyl 3-(N-butylacetamido)propionate	[M+H]+	C11H21NO3	VZRKEAFHFMSHCD-UHFFFAOYSA-N	78.7	HMDB0246904	C18830	Organic acids and derivatives	Carboxylic acids and derivatives	Carboxylic acid derivatives					1.18854e+06	315677	388491	901540	2.20161e+06	1.02668e+06	694015	1.20191e+06	899458	876980	877980	960292	0.0433131	215.152
MP6710	4.143	216.047	N-Acetyl-S-(4-fluorophenyl)cysteine	[M+H]+	C11H12FNO3S	MMFMNCSNACXBFZ-JTQLQIEISA-N	78.6										226955	713963	554423	297378	687780	489738	460213	657469	523987	494507	520696	523927	0.0276563	257.052
MP12845	3.958	360.198	Versicomide D	[M+H]+	C19H25N3O4	FQQOZLHPNGWWQX-CQDKDKBSSA-N	78.6			Organoheterocyclic compounds	Diazines	Pyrimidines and pyrimidine derivatives					5.554e+06	9.25004e+06	1.14723e+07	9.9336e+06	812836	469631	865917	675183	5.12151e+06	5.16007e+06	5.09566e+06	5.09558e+06	0.00595097	359.185
MP8404	5.613	253.179	Sativene epoxide	[M+H]+	C15H24O3	VHMNAPBFMHCKLZ-UHFFFAOYSA-N	78.5			Lipids and lipid-like molecules	Prenol lipids	Sesquiterpenoids					1.36567e+07	1.21216e+07	1.19525e+07	1.26273e+07	1.25431e+07	1.34722e+07	1.25578e+07	1.42693e+07	1.23752e+07	1.23242e+07	1.22406e+07	1.23742e+07	0.00513355	252.173
MP7862	3.763	241.203	n-{4-[n'-(3-methylbut-2-en-1-yl)carbamimidamido]butyl}ethanimidic acid	[M+H]+	C12H24N4O	ZOSKONQHHUEEMF-UHFFFAOYSA-N	78.5			Organic acids and derivatives	Carboxylic acids and derivatives	Carboxylic acid derivatives					2.85125e+06	2.52411e+06	3.64289e+06	1.46457e+06	1.80893e+06	1.39935e+06	1.82974e+06	1.98653e+06	1.85488e+06	1.81302e+06	1.81286e+06	1.813e+06	0.0114934	240.195
MP4956	4.149	178.122	4-APDB	[M+H]+	C11H15NO	LTXYRVJSOQKJAH-UHFFFAOYSA-N	78.5			Organoheterocyclic compounds	Coumarans						1.32659e+06	1.19562e+06	1.26529e+06	946745	2.27739e+06	1.54727e+06	1.40282e+06	1.69078e+06	1.55789e+06	1.5579e+06	1.52603e+06	1.52595e+06	0.011945	177.115
MP8649	3.617	258.131	Indolmycin	[M+H]+	C14H15N3O2	GNTVWGDQPXCYBV-YBJWJCFPNA-N	78.5		C21444								9.86073e+06	1.76915e+07	2.32966e+07	2.4522e+07	1.3323e+06	932671	1.7048e+06	1.01389e+06	1.08088e+07	1.09014e+07	1.08087e+07	1.08444e+07	0.00403732	257.116
MP10149	4.917	292.136	1-{3,3-dimethyl-7h-pyrano[2,3-c]carbazol-10-yl}ethanone	[M+H]+	C19H17NO2	KGSIEHHCVVSUOW-UHFFFAOYSA-N	78.5			Organoheterocyclic compounds	Indoles and derivatives	Carbazoles					448525	468801	660223	396402	46082.5	1.69053e+06	4.11827e+06	3.03454e+06	876181	875755	876818	684108	0.116	291.126
MP8498	3.598	255.12	Phomalone	[M+ACN+H]+	C13H18O5	PTBQWWHUOMDVFS-UHFFFAOYSA-N	78.5			Organic oxygen compounds	Organooxygen compounds	Carbonyl compounds					694412	84738	53789.6	540739	398792	101210	27024.1	77228.4	158666	135373	89829.6	92322.3	0.282955	254.115
MP9566	3.34	278.185	N-Acetylprocainamide	[M+2H]2+	C15H23N3O2	KEECCEWTUVWFCV-UHFFFAOYSA-N	78.5	HMDB0041944		Benzenoids	Benzene and substituted derivatives	Benzoic acids and derivatives					7.93695e+06	5.31969e+06	3.15834e+06	3.39436e+06	277179	4.13078e+06	5.02166e+06	4.18217e+06	2.67509e+06	2.73342e+06	2.65555e+06	2.65553e+06	0.0137519	277.179
MP9193	3.279	270.154	N-cyclohexyl-N-methyl-6-quinoxalinecarboxamide	[2M+H]+	C16H19N3O	FWMYHNZVRANXGP-UHFFFAOYSA-N	78.5										1.23032e+06	1.26986e+06	1.129e+06	858061	2.27215e+06	832183	352893	1.5727e+06	819171	720851	715978	824982	0.0778055	269.153
MP15437	5.361	432.237	N-(2-(((1S,9aR)-octahydro-1H-quinolizin-1-yl)methyl)-3-oxo-1,2,3,4-tetrahydrobenzo[4,5]imidazo[1,2-a]pyrazin-8-yl)propionamide	[M+Na]+	C23H31N5O2	NVXMWPFVIMTPPT-QFBILLFUSA-N	78.5			Organoheterocyclic compounds	Quinolizines						5.37513e+07	2.85969e+07	4.37333e+07	4.01446e+07	2.89793e+07	1.14054e+07	1.81629e+07	1.44164e+07	2.9681e+07	2.97052e+07	3.00729e+07	3.00635e+07	0.00725569	409.248
MP2106	5.454	111.02	Ethylphosphonic acid	[M+ACN+H]+	C2H7O3P	GATNOFPXSDHULC-UHFFFAOYSA-N	78.5	HMDB0252085		Organic acids and derivatives	Organic phosphonic acids and derivatives	Organic phosphonic acids					23645.5	16004.8	2.10608e+07	2.02126e+07	8.25424e+07	1.25621e+07	1.53814e+07	27818	3.28179e+07	2.32172e+07	2.60737e+07	2.36643e+07	0.167569	110.013
MP6011	3.684	201.112	Lacinilene A	[M+H]+	C14H16O	IUYVYWGWLYHKNT-UHFFFAOYSA-N	78.4			Benzenoids	Naphthalenes	Naphthols and derivatives					441791	95463	447290	90288.7	496914	128378	60182.9	23464.1	178980	120533	114545	201006	0.278716	200.12
MP3025	0.844	135.003	2,5-Thiophenedinitrile	[M+H]+	C6H2N2S	MYINLNBRJVGINA-UHFFFAOYSA-N	78.4			Organoheterocyclic compounds	Thiophenes	2,5-disubstituted thiophenes					374675	271794	205170	324550	289691	934226	199873	372832	397429	392087	406531	392137	0.0171313	133.994
MP8566	5.813	256.271	1,3,5-tributyl-1,3,5-triazinane	[M+H]+	C15H33N3	OIQDTXAPPNRLAS-UHFFFAOYSA-N	78.4			Organoheterocyclic compounds	Triazinanes	1,3,5-triazinanes					392668	117842	82306.8	206062	1.04301e+06	427557	445149	463735	346425	587124	352603	691054	0.348987	255.267
MP10477	3.331	300.198	Yl 02729S	[M+H]+	C19H25NO2	HMCYNESTDVUAKN-UHFFFAOYSA-N	78.3			Organoheterocyclic compounds	Quinolines and derivatives	Quinolones and derivatives					7.19399e+07	5.96577e+07	5.27246e+07	5.4378e+07	5.52002e+07	6.06191e+07	6.30825e+07	7.00163e+07	4.68978e+07	4.45937e+07	4.44003e+07	4.43964e+07	0.027082	299.189
MP14271	6.732	399.307	OAG	[M+Na]+	C23H42O5	PWTCCMJTPHCGMS-ZHACJKMWSA-N	78.3			Lipids and lipid-like molecules	Glycerolipids	Diradylglycerols					2.95788e+06	2.59724e+06	2.33147e+06	3.67551e+06	4.50121e+06	7.8042e+06	5.9413e+06	7.82617e+06	4.54784e+06	4.92052e+06	4.60979e+06	4.53292e+06	0.0390254	398.303
MP25256	6.355	693.475	Veraguamide I	[M+H]+	C37H64N4O8	DOBIBZDFHDCVHA-UHFFFAOYSA-N	78.2			Organic acids and derivatives	Peptidomimetics	Depsipeptides					911115	1.15447e+06	349622	855725	1.66395e+06	2.58458e+06	2.42299e+06	5.29412e+06	1.08326e+06	980209	1.01765e+06	1.15763e+06	0.073569	692.472
MP12034	5.252	339.113	1-[(3S)-3-(1,3-Benzothiazol-2-yl)-1-pyrrolidinyl]-2-phenoxyethanone	[M+H]+	C19H18N2O2S		78										117442	140138	139594	22318.7	436950	2.77045e+06	3.79226e+06	3.05235e+06	1.2735e+06	1.19514e+06	1.26178e+06	1.27357e+06	0.0300934	338.109
MP10157	5.29	292.226	Penbutolol	[M+CH3OH+H]+	C18H29NO2	KQXKVJAGOJTNJS-OAHLLOKOSA-N	78	HMDB0015447	C07416	Benzenoids	Phenol ethers						1.96366e+06	3.00564e+06	4.38212e+06	2.48545e+06	7.74151e+06	4.19246e+06	3.7629e+06	3.3439e+06	3.7568e+06	3.82966e+06	3.7222e+06	3.78415e+06	0.0120264	291.22
MP24727	5.491	679.458	Veraguamide J	[M+H]+	C36H62N4O8	VJYQPLSJYQMFHT-UHFFFAOYSA-N	77.9			Organic acids and derivatives	Peptidomimetics	Depsipeptides					5.90401e+07	6.30143e+07	6.76986e+07	4.60588e+07	1.24531e+07	1.33329e+07	1.98542e+07	1.96541e+07	4.35383e+07	4.46138e+07	4.33166e+07	4.27641e+07	0.0178008	678.457
MP8491	3.316	255.086	4,6,8-Trihydroxy-3-methoxy-3,7-dimethylisochroman-1-one	[M+H]+	C12H14O6	AEEFUJJCLNUIMG-SREIQFSDSA-N	77.9			Benzenoids	Benzene and substituted derivatives	Benzoic acids and derivatives					102418	269151	1.47202e+06	1.6794e+06	35058.3	341469	1.94753e+06	70565.1	719270	749963	719066	719193	0.0211782	254.079
MP18607	5.997	517.279	4,4'-Propane-2,2-diylbis(2-aminophenol)	[M+H]+	C15H18N2O2	UHIDYCYNRPVZCK-UHFFFAOYSA-N	77.9										1.51451e+06	2.67518e+06	1.14795e+06	1.63558e+06	3.10812e+06	2.27363e+06	2.32636e+06	2.68188e+06	2.03436e+06	1.9331e+06	1.93385e+06	1.96315e+06	0.0242089	258.137
MP11163	3.903	317.192	(1'S,2'R,3S,3'S,5'S)-2'-(hydroxymethyl)-3'-[(2S)-2-hydroxypropyl]spiro[1H-indole-3,6'-8-azabicyclo[3.2.1]octane]-2-one	[M+H]+	C18H24N2O3	ZPMZMDMYYCLKMQ-NVMBSAOKSA-N	77.8			Organic acids and derivatives	Carboxylic acids and derivatives	Amino acids, peptides, and analogues					5.48696e+07	8.48194e+07	1.0624e+08	9.64397e+07	7.1222e+06	5.45306e+06	9.01792e+06	6.29745e+06	5.00234e+07	4.99478e+07	4.94366e+07	5.00232e+07	0.00567657	316.179
MP20941	5.018	577.354	(2S)-N2-[(2S)-1-amino-3-cyclohexyl-1-oxo-2-propanyl]-N1-cyclohexyl-4-[4-(dimethylamino)benzoyl]-1,2-piperazinedicarboxamide	[M+Na]+	C30H46N6O4		77.8										4.85533e+06	6.46352e+06	1.03034e+07	4.81899e+06	321430	131214	645904	313761	3.68793e+06	3.61874e+06	3.88745e+06	3.61984e+06	0.0342478	554.358
MP5559	4.459	191.106	2-(2,3-Dimethylphenoxy)-2-methylpropanoic acid	[M+Na]+	C12H16O3	BVMJEFFWDAOAAU-UHFFFAOYSA-N	77.7			Benzenoids	Benzene and substituted derivatives	Phenoxyacetic acid derivatives					2.00497e+06	1.01035e+06	2.06934e+06	733860	1.01562e+06	291299	450753	518001	1.03307e+06	1.06637e+06	1.02325e+06	1.04902e+06	0.0181157	208.11
MP27298	6.991	747.508	Narasin	[M+H]+	C43H72O11	VHKXXVVRRDYCIK-CWCPJSEDSA-N	77.7	HMDB0030448		Lipids and lipid-like molecules	Prenol lipids	Terpene glycosides					4.46632e+06	7.24423e+06	1.1652e+07	8.66478e+06	782246	239687	556153	956780	3.88149e+06	4.29386e+06	3.8845e+06	3.90552e+06	0.0505998	764.507
MP10184	4.781	293.174	Dehydrocineromycin B	[M+H]+	C17H24O4	RZPYXXIOJYPPLT-YLTVUTEZSA-N	77.7			Phenylpropanoids and polyketides	Macrolides and analogues						8.25151e+06	2.61197e+06	5.12184e+06	1.71076e+06	4.28148e+06	1.56506e+06	2.02181e+06	2.68382e+06	4.05499e+06	3.80226e+06	3.65235e+06	3.66832e+06	0.0490792	292.167
MP18082	4.948	503.318	Ananatoside A	[M+H]+	C26H46O9	QWQCOOPIGZDEDP-VAOOWHSSSA-N	77.6			Lipids and lipid-like molecules	Fatty Acyls	Fatty acyl glycosides					1.16145e+07	2.92439e+07	3.32686e+07	2.00236e+07	3.8763e+06	2.22747e+06	3.19548e+06	3.01193e+06	1.67762e+07	1.64706e+07	1.61013e+07	1.60201e+07	0.0213926	502.314
MP11073	6.144	315.231	Methyl Dehydroabietate	[M+H]+	C21H30O2	PGZCJOPTDHWYES-HMXCVIKNSA-N	77.6			Lipids and lipid-like molecules	Prenol lipids	Diterpenoids					1.18635e+07	969949	3.07481e+06	2.65405e+06	3.80479e+06	60411.7	176481	2.16342e+06	3.10283e+06	3.17352e+06	3.10281e+06	3.10272e+06	0.0113345	314.225
MP10041	4.666	289.292	Pregnane	[M+H]+	C21H36	JWMFYGXQPXQEEM-NUNROCCHSA-N	77.5		C01523								441214	603853	2.66842e+06	3.06051e+06	2.76207e+06	2.29823e+06	2.74076e+07	1.21333e+07	6.15017e+06	4.5966e+06	2.26483e+06	1.12511e+07	0.627781	288.282
MP11259	5.726	319.226	clathriadic acid	[M+H]+	C18H28N3O2	POLLUERWBGBCBB-KGLIPLIRSA-O	77.5			Organoheterocyclic compounds	Diazines	Pyrimidines and pyrimidine derivatives					2.13347e+06	1.70424e+06	3.63735e+06	1.91979e+06	2.49708e+06	2.57788e+06	1.8404e+06	3.0972e+06	2.61158e+06	2.73608e+06	2.55842e+06	2.55754e+06	0.0321137	318.218
MP3165	1.153	138.091	N-(3-Methoxybenzyl)-2-methyl-2-propanamine	[M+NH4]+	C12H19NO	BAZYXMARGARHPJ-UHFFFAOYSA-N	77.5										216697	702349	644775	822852	619525	677567	537607	598294	569039	573821	590505	569008	0.0177129	193.147
MP11664	5.089	330.19	Heliotrine N-oxide	[M+H]+	C16H27NO6	QSTHEUSPIBEICI-MCAMCBDESA-N	77.5			Alkaloids and derivatives							354312	895237	1.43487e+06	406095	2.94716e+06	134686	282961	86833.3	675574	649301	618889	667170	0.0384258	329.184
MP5606	3.008	192.138	3-Methylbuphedrone	[M+Na]+	C12H17NO	XTCTXCSGKAZSKT-UHFFFAOYSA-N	77.5										4.72589e+07	4.74774e+07	5.32446e+07	4.99726e+07	4.79792e+07	4.87848e+07	6.33702e+07	4.99635e+07	4.95055e+07	4.90899e+07	4.9518e+07	4.83528e+07	0.0111292	191.131
MP6619	4.944	214.089	N-butylbenzenesulphonamide	[M+H]+	C10H15NO2S	IPRJXAGUEGOFGG-UHFFFAOYSA-N	77.4			Benzenoids	Benzene and substituted derivatives	Benzenesulfonamides					6.12219e+06	5.8841e+06	6.03562e+06	5.69552e+06	6.25695e+06	5.65157e+06	6.3265e+06	6.30226e+06	6.17128e+06	6.26801e+06	6.22733e+06	6.268e+06	0.0073454	213.082
MP10830	4.46	309.226	PPG n5	[M+H]+	C15H32O6	AQRQHYITOOVBTO-UHFFFAOYSA-N	77.4			Organic oxygen compounds	Organooxygen compounds	Alcohols and polyols					3.97915e+06	4.28522e+06	8.19983e+06	7.28341e+06	81537.9	606802	84488.8	418732	1.70097e+06	1.64829e+06	2.53089e+06	2.53504e+06	0.235777	308.22
MP17276	6.318	483.357	Octapropylene glycol	[M+CH3OH+H]2+	C24H50O9	ZZEANNAZZVVPKU-UHFFFAOYSA-N	77.3			Organic oxygen compounds	Organooxygen compounds	Alcohols and polyols					2.40544e+07	5.23848e+07	5.40541e+07	3.0305e+07	5.64763e+06	2.73252e+06	3.81475e+06	3.95955e+06	2.06893e+07	2.06598e+07	2.07783e+07	1.83294e+07	0.0592082	482.345
MP6764	1.339	217.154	Valylvaline	[M+H]+	C10H20N2O3	KRNYOVHEKOBTEF-JGVFFNPUSA-N	77.3	HMDB0029140		Organic acids and derivatives	Carboxylic acids and derivatives	Amino acids, peptides, and analogues					196150	961513	1.02965e+06	634388	480212	803105	621256	570355	680404	680399	680414	669817	0.00781153	216.147
MP8496	3.654	255.112	Infractin	[M+H]+	C15H14N2O2	IYWBIIGDWQBZJQ-UHFFFAOYSA-N	77.3			Alkaloids and derivatives	Harmala alkaloids						956731	935615	726970	903673	1.07793e+06	655199	874055	2.31256e+06	1.07153e+06	1.0031e+06	1.07194e+06	1.0547e+06	0.0309308	254.106
MP12030	4.107	339.018	2-[1-oxophthalazin-2(1H)-yl]ethyl thiophene-2-carboxylate	[M+Na]+	C15H12N2O3S		77.3										982354	1.27969e+06	1.1648e+06	1.33557e+06	1.17814e+06	1.62421e+06	1.16046e+06	1.45315e+06	1.288e+06	1.28811e+06	1.24351e+06	1.27438e+06	0.016494	300.057
MP19213	7.051	532.35	Indotertine B	[M+H]+	C33H45N3O3	CLQRSQVWBQMYTC-OESDABHNSA-N	77.2			Organoheterocyclic compounds	Indoles and derivatives	Carbazoles					35876.2	32822.4	803931	195159	1.10068e+06	2.44723e+06	405091	534491	299723	24395.9	620799	1.00358e+06	0.865968	531.346
MP20363	5.169	561.359	mcPAF(C16)	[M+Na]+	C26H55N2O7P		77.2										1.17677e+07	2.75485e+07	2.99013e+07	1.7217e+07	3.432e+06	2.36849e+06	3.27402e+06	3.25684e+06	1.45011e+07	1.45346e+07	1.43832e+07	1.44059e+07	0.00505556	538.375
MP24148	3.894	663.396	methyl (1S,12R,14S,15E,18S)-15-ethylidene-12-[(1'S,2S,7'R,8'S,9'S)-9'-ethyl-5-methoxy-3-oxospiro[1H-indole-2,6'-3-azatricyclo[5.3.1.03,8]undecane]-6-yl]-17-methyl-10,17-diazatetracyclo[12.3.1.03,11.04,9]octadeca-3(11),4,6,8-tetraene-18-carboxylate	[M+H]+	C41H50N4O4	VNPNTCIULDUSTQ-HVIOGEPBSA-N	77.1			Alkaloids and derivatives	Vobasan alkaloids						2.00413e+07	1.75637e+07	1.27882e+07	5.5045e+06	5.89121e+06	5.29869e+06	3.43603e+06	4.90462e+06	9.47506e+06	9.65291e+06	9.66831e+06	9.66796e+06	0.00980367	662.383
MP4165	0.651	160.096	5-Acetamidovalerate	[M+H]+	C7H13NO3	TZZSWAXSIGWXOS-UHFFFAOYSA-N	77.1	HMDB0012175	C03087	Lipids and lipid-like molecules	Fatty Acyls	Fatty acids and conjugates	Lipids	FA Fatty acyls	FA00 Other Fatty Acyls		418309	1.05402e+06	573601	458447	859628	522479	896297	296710	645954	691161	645980	646078	0.0343503	159.09
MP8154	1.221	247.115	ellipticine	[M+H]+	C17H14N2	CTSPAMFJBXKSOY-UHFFFAOYSA-N	77	HMDB0251751	C09154	Organoheterocyclic compounds	Indoles and derivatives	Carbazoles	Alkaloids	Alkaloids derived from tryptophan and anthranilic acid	Indole alkaloids		323559	5.31743e+06	3.71258e+06	1.09321e+06	2.58701e+07	705603	284492	357209	4.24807e+06	4.41973e+06	4.37703e+06	4.40445e+06	0.0179233	246.116
MP5185	6.958	182.985	1-(3-Bromophenyl)ethanol	[M+ACN+H]+	C8H9BrO	ULMJQMDYAOJNCC-UHFFFAOYSA-N	77										3.04052e+07	2.07888e+07	3.23321e+07	3.06867e+07	1.53597e+07	1.58139e+07	1.71409e+07	1.44316e+07	2.49687e+07	2.63713e+07	1.80279e+07	1.792e+07	0.205312	199.984
MP25320	6.362	695.491	Bacilotetrin A	[M+H]+	C37H66N4O8	UBOCYUXOELCZII-UHFFFAOYSA-N	77			Organic acids and derivatives	Peptidomimetics	Depsipeptides					3.47949e+06	2.29695e+06	888642	501919	2.63828e+07	8.07099e+06	1.95577e+07	2.49322e+07	1.27577e+07	1.2736e+07	1.27545e+07	7.41724e+06	0.233533	694.488
MP4507	0.497	168.025	N-(2-Chlorophenyl)-N-methyl-4H-thieno[3,2-c]chromene-2-carboxamide	[M+H-H2O]+	C19H14ClNO2S	PCSYEOAUKWBYOX-UHFFFAOYSA-N	76.8										1.94791e+06	2.10475e+06	1.71538e+06	1.84615e+06	1.97324e+06	1.8051e+06	950619	1.53777e+06	1.87245e+06	1.90361e+06	1.88974e+06	1.90362e+06	0.00781774	355.043
MP14412	4.92	403.292	Asperterpenoid C	[M+H]+	C25H38O4	HOJAIZSMUNKBJQ-SXFKLJQYSA-N	76.8			Lipids and lipid-like molecules	Prenol lipids	Sesquiterpenoids					17327	2.02633e+06	1.26556e+06	7.42412e+06	225788	260753	64978.6	2.11493e+06	1.43874e+06	1.35408e+06	1.33013e+06	1.32721e+06	0.0383148	402.277
MP8071	4.602	245.266	N,N'-Bis(3-Aminopropyl)Heptane-1,7-Diamine	[M+H]+	C13H32N4	SPMJPPVCVHLSGJ-UHFFFAOYSA-N	76.8			Organic nitrogen compounds	Organonitrogen compounds	Amines					3.56886e+06	2.88357e+06	3.79095e+06	8.9814e+06	9.60301e+06	1.08802e+07	211893	1.37632e+07	9.7204e+06	9.32867e+06	9.24567e+06	9.24779e+06	0.0241328	244.263
MP6425	3.409	210.112	4-methoxy-6-(piperidin-1-yl)pyran-2-one	[M+H]+	C11H15NO3	FBNGPXXWIZPFHE-UHFFFAOYSA-N	76.8			Organic nitrogen compounds	Organonitrogen compounds	Amines					1.36834e+06	1.87049e+06	2.33202e+06	2.54615e+06	1.48797e+06	971533	1.18657e+06	666499	1.52763e+06	1.54279e+06	1.55232e+06	1.52774e+06	0.0078763	209.105
MP2883	1.07	131.081	trans-4-Aminoproline	[M+H]+	C5H10N2O2	SHINASQYHDCLEU-UHFFFAOYSA-N	76.8	HMDB0030405		Organic acids and derivatives	Carboxylic acids and derivatives	Amino acids, peptides, and analogues					756720	1.11847e+06	1.39953e+06	959583	1.01357e+06	811362	772461	738676	919613	934236	1.00429e+06	919441	0.0429143	130.074
MP24943	3.905	685.409	Fungichromin B	[M+H]+	C36H60O12	TYEJDFPGVGCMMR-UHFFFAOYSA-N	76.7			Phenylpropanoids and polyketides	Macrolides and analogues						1.4138e+07	1.23192e+07	9.41878e+06	3.54051e+06	4.23948e+06	3.8554e+06	2.56369e+06	3.13217e+06	6.74613e+06	6.72232e+06	6.72248e+06	6.79214e+06	0.00487359	684.408
MP7191	5.82	226.216	(2s,4s,6r,9r,9ar)-4-isopropyl-6,9-dimethyl-octahydro-1h-quinolizin-2-ol	[M+H]+	C14H27NO	WPYIYVXSMXASQL-PEBLQZBPSA-N	76.6			Organoheterocyclic compounds	Quinolizines						1.42262e+06	540094	1.66162e+06	1.698e+06	1.94589e+06	1.81807e+06	700193	2.20154e+06	1.26749e+06	1.31152e+06	1.15355e+06	1.31249e+06	0.0593151	225.209
MP19262	6.053	533.377	Linoleic acid-biotin	[M+H-H2O]+	C28H48N4O3S		76.6										7.78235e+06	8.30277e+06	1.04845e+07	8.68214e+06	501287	53146.9	698098	434511	2.98225e+06	4.16276e+06	4.11512e+06	4.15657e+06	0.150919	520.345
MP7063	7.405	223.988	ETHYL 3-AMINO-4-(METHYLSULFONYL)-5-(METHYLTHIO)THIOPHENE-2-CARBOXYLATE	[2M+Na]+	C9H13NO4S3	OXPYNZFAYUQNQZ-UHFFFAOYSA-N	76.5										6.5976e+07	6.20821e+07	5.70408e+07	6.70871e+07	5.8354e+07	6.03901e+07	6.4905e+07	6.06372e+07	6.37401e+07	6.58521e+07	6.29869e+07	6.27917e+07	0.0219387	295.001
MP18603	5.347	517.251	5,7-dihydroxy-2-(4-hydroxy-3,5-dimethoxyphenyl)-6-[(E)-6-hydroxy-7-methoxy-3,7-dimethyloct-2-enyl]-2,3-dihydrochromen-4-one	[M+H]+	C28H36O9	ZFUSDYXRBKYLMJ-WCHYYCAUSA-N	76.4			Lipids and lipid-like molecules	Prenol lipids	Sesquiterpenoids					2.80032e+06	2.19673e+06	2.09615e+06	1.86662e+06	2.70466e+06	2.24748e+06	2.1261e+06	2.31542e+06	2.42117e+06	2.42092e+06	2.38172e+06	2.39452e+06	0.00819881	516.236
MP18294	3.79	509.304	Aburatubolactam C	[M+H]+	C30H40N2O5	PZOGZFUWIDIULD-UHFFFAOYSA-N	76.4			Phenylpropanoids and polyketides	Macrolactams						1.58716e+07	1.36385e+07	1.06403e+07	4.84534e+06	4.57056e+06	4.51349e+06	3.45401e+06	3.94902e+06	7.53866e+06	7.40955e+06	7.49367e+06	7.53828e+06	0.00810973	508.294
MP8481	7.661	254.915	2-Chloro-5-iodo-4-pyridinamine	[M+ACN+H]+	C5H4ClIN2	DEJUUKULVAIMNF-UHFFFAOYSA-N	76.3										6.67224e+06	6.26252e+06	6.45761e+06	6.64994e+06	6.05035e+06	6.11546e+06	6.06267e+06	5.75262e+06	6.26384e+06	6.26928e+06	6.09812e+06	6.7888e+06	0.0471923	253.911
MP13447	5.206	376.258	(1S,3R,6S,6aR,6bR,8S,9S,11R,11aR,12R,12aR,14R)-1-ethyl-6,8,11-trihydroxy-3-methyl-10-methylenetetradecahydro-3,6a,12-(epiethane[1,1,2]triyl)-9,11a-methanoazuleno[2,1-b]azocine 1-oxide	[M+H]+	C22H33NO4	DEMQJEXKIJFBRD-HQOPBMQXSA-N	76.3			Lipids and lipid-like molecules	Prenol lipids	Diterpenoids					1.50003e+07	1.6962e+07	1.32893e+07	1.82735e+07	1.53165e+07	1.42687e+07	1.73374e+07	1.94255e+07	3.55991e+07	3.52534e+07	3.54903e+07	3.58092e+07	0.00650904	375.241
MP11106	3.306	316.211	2-[(3S)-1-(Cyclohexylmethyl)-3-pyrrolidinyl]-5-(1-methyl-1H-imidazol-5-yl)-1,3,4-oxadiazole	[M+H]+	C17H25N5O		76.2										3.15653e+08	3.67257e+08	4.14859e+08	4.30442e+08	3.39487e+08	4.05339e+08	3.7348e+08	3.88637e+08	3.75211e+08	3.75385e+08	3.73827e+08	3.71581e+08	0.0046986	315.206
MP10043	4.845	289.313	Testosterone	[M+H]+	C19H28O2	MUMGGOZAMZWBJJ-UHFFFAOYSA-N	76.2	HMDB0000234	C00535	Lipids and lipid-like molecules	Steroids and steroid derivatives	Androstane steroids	Steroids; Hormones and transmitters	19-Carbon atoms; Steroid hormones	Androstane derivatives; Androgens		133160	14506.7	18954.5	128493	168894	50336	20437.6	14080.4	123590	43972.5	111711	77301.1	0.403245	288.209
MP4896	0.43	176.971	(1,3,4-thiadiazol-2-ylthio)acetic acid	[M+ACN+H]+	C4H4N2O2S2	DZXGDEPWZLFUEA-UHFFFAOYSA-N	76.2										5.73532e+06	4.4753e+06	3.06759e+06	2.27416e+06	6.1471e+06	4.45503e+06	8.54434e+06	4.85142e+06	4.939e+06	5.42814e+06	4.8852e+06	4.88869e+06	0.0522464	175.971
MP23546	6.938	647.454	Irgafos 168	[M+H]+	C42H63O3P	JKIJEFPNVSHHEI-UHFFFAOYSA-N	76.1										705527	1.8058e+07	1.82775e+06	608273	583555	125934	185143	26775.7	1.25019e+06	1.04647e+06	2.07735e+06	1.28244e+06	0.321285	646.451
MP15702	5.246	439.307	Sarsasapogenin	[M+Na]+	C27H44O3	GMBQZIIUCVWOCD-RCISUQKONA-N	76	HMDB0030024	C03963	Lipids and lipid-like molecules	Prenol lipids	Triterpenoids	Steroids	27-Carbon atoms	Spirostan derivatives		4.28392e+06	5.11371e+06	5.78752e+06	3.62664e+06	806800	634808	172342	518214	3.59554e+06	3.32386e+06	3.28834e+06	3.73082e+06	0.0613904	416.329
MP6464	0.653	211.099	sinapyl alcohol	[M+H]+	C11H14O4	LZFOPEXOUVTGJS-ONEGZZNKSA-N	76	HMDB0013070	C02325	Benzenoids	Phenols	Methoxyphenols	Phenylpropanoids	Monolignols	Sinapate derivatives		833721	1.58018e+06	2.36136e+06	1.2971e+06	1.48389e+06	2.09003e+06	1.41911e+06	1.55876e+06	1.58849e+06	1.63719e+06	1.57446e+06	1.57454e+06	0.0186692	210.089
MP11172	4.456	317.21	Clavirolide E	[M+H]+	C20H28O3	NWJFACOHEKJWOZ-NJOALTMESA-N	76										2.92062e+06	815883	1.09311e+06	408920	821569	232359	220663	336408	830132	829488	840368	883691	0.0303448	316.204
MP16411	5.666	459.355	2,6,6,10,14,17,17-heptamethyl-21,22-dioxahexacyclo[18.2.2.0,.0,.0,.0,]tetracos-23-ene-7,8-diol	[M+H]+	C29H46O4		75.9										534533	597396	970519	7.61113e+07	1.11272e+06	1.31674e+06	1.15188e+06	1.58033e+07	1.43272e+07	1.4331e+07	1.39664e+07	1.39385e+07	0.0154008	458.34
MP5230	3.853	184.133	ethyl (1r,7ar)-hexahydro-1h-pyrrolizine-1-carboxylate	[M+H]+	C10H17NO2	FBZMBOHWVBVEDR-RKDXNWHRSA-N	75.9			Organoheterocyclic compounds	Pyrrolizidines						482071	941882	662575	1.8225e+06	1.19954e+06	1.74844e+06	597901	3.4854e+06	1.35496e+06	1.40092e+06	1.3674e+06	1.35479e+06	0.0158838	183.126
MP8346	4.27	252.156	4-(5-pentylpyrimidin-2-yl)benzonitrile	[M+CH3OH+H]+	C16H17N3	RGONNDWSVOCREF-UHFFFAOYSA-N	75.7			Benzenoids	Benzene and substituted derivatives	Benzonitriles					711125	729402	396430	1.19405e+06	1.4496e+06	2.04509e+06	563793	2.70813e+06	1.42539e+06	1.29615e+06	1.2696e+06	1.27043e+06	0.0565329	251.142
MP11705	5.449	331.19	(8beta)-8-[(Methylsulfinyl)methyl]-6-propylergoline	[M+H]+	C19H26N2OS	WOIHSNDTPKFAJW-ASVPFLOSSA-N	75.7										2.55398e+06	518394	2.3485e+06	644472	672631	214722	293051	290182	834964	851479	835442	879998	0.0248429	330.177
MP6476	4.815	211.169	4-(2,6,6-Trimethyl-3-oxo-1-cyclohexen-1-yl)-2-butanyl beta-D-glucopyranoside	[2M+NH4]+	C19H32O7		75.7										1.18535e+06	1.25016e+06	1.141e+06	6.80523e+06	1.63404e+06	2.46093e+06	2.03483e+06	1.09513e+07	3.72176e+06	3.68434e+06	3.65303e+06	3.72219e+06	0.00901506	372.215
MP4076	7.718	158.002	3-(3-chloroisoxazol-5-yl)propanoic acid	[M+H]+	C6H6ClNO3	ZGQBVKLPCMHTEI-UHFFFAOYSA-N	75.6			Organohalogen compounds	Aryl halides	Aryl chlorides					2.29995e+06	1.59239e+06	2.05467e+06	3.68081e+06	2.55091e+06	2.16417e+06	1.42034e+06	3.47229e+06	2.01297e+06	1.99317e+06	2.01048e+06	2.32251e+06	0.0761366	175.004
MP9266	5.683	271.226	salviatriene B	[M+H]+	C20H30	GTRREZWKDFADOO-UHFFFAOYSA-N	75.6			Lipids and lipid-like molecules	Prenol lipids	Sesquiterpenoids					1.51707e+06	1.52061e+06	1.79551e+06	1.79169e+06	2.2503e+06	1.89137e+06	1.91079e+06	1.95261e+06	1.84996e+06	1.85082e+06	1.85109e+06	1.92885e+06	0.0209144	270.235
MP3118	0.94	137.045	Sarkin	[M+H]+	C5H4N4O	FDGQSTZJBFJUBT-UHFFFAOYSA-N	75.5	HMDB0000157	C00262	Organoheterocyclic compounds	Imidazopyrimidines	Purines and purine derivatives	Alkaloids	Others	Purine alkaloids		405994	1.36045e+06	2.15586e+06	1.46832e+06	421962	484599	429285	367865	841616	865120	849726	856548	0.0117107	136.039
MP7242	4.016	227.211	Dihydrocuscohygrine	[M+H]+	C13H26N2O	UOJNOOLFFFFKNA-RYUDHWBXSA-N	75.5			Organoheterocyclic compounds	Pyrrolidines	N-alkylpyrrolidines					88884.1	203262	186159	1.42884e+06	150283	251893	187086	2.25552e+06	567455	567318	567423	546397	0.0186802	226.205
MP8103	1.083	246.144	4-[4-phenyl-3,6-dihydro-1(2H)-pyridinyl]butanoic acid hydrochloride	[2M+NH4]+	C15H19NO2		75.4										228781	538547	1.05548e+06	339513	2.07731e+06	106500	170913	244611	571836	561668	547800	586382	0.0287343	245.142
MP9259	4.846	271.172	(6S,7E)-6-ethenyl-8-(4-hydroxyphenyl)-2,6-dimethylocta-1,7-dien-3-one	[M+H]+	C18H22O2	OYAQUBKYAKSHOA-UHFFFAOYSA-N	75.4			Benzenoids	Benzene and substituted derivatives	Biphenyls and derivatives					1.46483e+06	927768	2.26295e+06	1.41743e+06	5.62275e+06	2.83963e+06	2.21392e+06	2.89242e+06	3.01861e+06	2.93526e+06	2.58879e+06	3.02195e+06	0.0710881	270.162
MP12434	5.691	349.237	(1S,4aR,5S)-5-[(3E)-5-Methoxy-3-methyl-5-oxo-3-penten-1-yl]-1,4a-dimethyl-6-methylenedecahydro-1-naphthalenecarboxylic acid	[M+NH4]+	C21H32O4		75.4										4.4072e+06	1.17696e+06	1.85235e+06	990008	2.76662e+06	2.196e+06	1.63118e+06	1.84412e+06	1.75964e+06	1.77683e+06	1.62235e+06	1.7074e+06	0.0404278	348.23
MP14905	5.25	417.294	7',9',13'-trimethyl-5'-oxaspiro[oxane-2,6'-pentacyclo[10.8.0.0,.0,.0,]icosan]-18'-ene-10',16'-diol	[M+H]+	C26H40O4		75.3										7.6805e+06	5.62524e+06	1.28354e+07	3.71201e+06	103009	893895	543911	771188	4.45357e+06	4.13956e+06	4.5114e+06	4.13144e+06	0.0468194	416.293
MP18442	4.854	513.283	Elegain	[M+H]+	C30H40O7	UPUCZQWCCLUQMO-NPRLQMQYSA-N	75.3			Lipids and lipid-like molecules	Prenol lipids	Terpene lactones					344983	3.24681e+06	1.21419e+06	1.29767e+06	3.94057e+06	1.13622e+06	259447	245918	1.49077e+06	1.4873e+06	1.43919e+06	1.52947e+06	0.0248765	512.277
MP6667	1.351	215.102	7-(1-hydroxyethyl)-4-methyl-1-azulenecarboxaldehyde	[M+H]+	C14H14O2	MMOCNRWMQYLWLE-UHFFFAOYSA-N	75.3			Lipids and lipid-like molecules	Prenol lipids	Sesquiterpenoids					177414	116263	16859	6542.33	2.22972e+06	4919	4928.48	5098.8	240022	9269.47	211181	241225	0.636384	214.099
MP11490	4.302	325.248	{(3R,4S)-1-(Cyclobutylcarbonyl)-3-[2-(diethylamino)ethyl]-4-piperidinyl}acetic acid	[M+H]+	C18H32N2O3		75.2										678184	2.09112e+06	5.31655e+06	5.19262e+06	1.77443e+06	2.11308e+06	846454	4.95222e+06	3.06105e+06	3.04178e+06	3.07584e+06	3.1035e+06	0.00847483	324.241
MP21562	4.79	593.386	imipraminoxide	[M+Na]+	C19H24N2O	QZIQORUGXBPDSU-UHFFFAOYSA-N	75.2	HMDB0253434		Organoheterocyclic compounds	Benzazepines	Dibenzazepines					2.62204e+07	3.6958e+07	4.03942e+07	2.81349e+07	5.09528e+06	3.76032e+06	4.9791e+06	4.62091e+06	2.1858e+07	2.15402e+07	2.18685e+07	2.08252e+07	0.0227439	296.189
MP7415	0.656	231.043	anthraquinone	[M+Na]+	C14H8O2	RZVHIXYEVGDQDX-UHFFFAOYSA-N	75.1	HMDB0248468	C16207	Benzenoids	Anthracenes	Anthraquinones	Lipids	PK Polyketides	PK13 Aromatic polyketides		758534	523733	358992	739231	410303	292413	572161	374636	403754	398127	403870	385808	0.021334	208.052
MP2545	0.938	122.057	ERYTHRITOL	[M+H]+		UNXHWFMMPAWVPI-ZXZARUISSA-N	75.1	HMDB0002994	C00503	Organic oxygen compounds	Organooxygen compounds	Carbohydrates and carbohydrate conjugates					1.93938e+06	1.82891e+06	1.85265e+06	2.5671e+06	1.52832e+06	2.25586e+06	1.20319e+06	1.47606e+06	1.75845e+06	1.76071e+06	1.68898e+06	1.69178e+06	0.0231765
MP1050	0.025	87.0038	Piperazine	[M+H]+	C4H10N2	GLUUGHFHXGJENI-UHFFFAOYSA-N	75.1	HMDB0014730	C07973	Organoheterocyclic compounds	Diazinanes	Piperazines					4.53816e+06	3.97367e+06	3.87325e+06	3.8577e+06	3.78812e+06	3.89337e+06	3.93763e+06	3.4439e+06	3.86139e+06	3.90024e+06	3.77678e+06	3.78739e+06	0.015484	86.0844
MP12200	4.703	343.295	Cocamidopropyl betaine	[M+H]+	C19H38N2O3	MRUAUOIMASANKQ-UHFFFAOYSA-N	75			Organic acids and derivatives	Carboxylic acids and derivatives	Amino acids, peptides, and analogues					6.39355e+07	1.08216e+08	6.69628e+07	4.46544e+07	2.18837e+07	5.27652e+07	1.45729e+07	2.89867e+07	5.51828e+07	5.44606e+07	5.18566e+07	5.5165e+07	0.0290973	342.288
MP9901	4.845	286.237	4-ANPP-d5	[M+H]+	C19H192H5N2		75										32432.3	24538.1	41630.3	503956	213373	388170	975879	559766	380295	324706	404101	171628	0.326296	454.548
MP3646	3.492	149.023	Di(2,6-dimethyl-4-heptyl) phthalate	[M+H-H2O]+	C26H42O4	ZTIBSRHEQOIADA-UHFFFAOYSA-N	75			Benzenoids	Benzene and substituted derivatives	Benzoic acids and derivatives					1.4536e+06	1.46761e+06	1.68537e+06	1.54065e+06	1.42268e+06	981647	948498	1.16537e+06	1.2766e+06	1.27677e+06	1.29534e+06	1.32792e+06	0.0186747	418.308
MP14645	5.066	410.112	methyl 3-{2-[4-(dimethylamino)benzylidene]hydrazino}-4-(propylsulfonyl)thiophene-2-carboxylate	[M+ACN+H]+	C18H23N3O4S2		75										3.19303e+06	2.44052e+06	3.32633e+06	2.93894e+06	2.98482e+06	3.18133e+06	2.65918e+06	1.0215e+06	3.13605e+06	3.13918e+06	2.92801e+06	2.95365e+06	0.037544	409.113
MP15174	6.271	425.214	(-)-Vincawajine	[M+H]+	C24H28N2O5	NVBKJHMKBGTOJC-FWHNLIHLNA-N	74.9										3.70396e+07	4.24106e+07	2.45731e+07	2.29064e+07	5.61433e+07	3.56249e+07	2.22617e+07	2.32086e+07	2.86998e+07	2.87099e+07	2.80332e+07	2.71967e+07	0.0254254	424.2
MP11069	3.194	315.203	1-Ethyl-3-[(1S,2S,3S,4R,5R)-3-hydroxy-4-(4-methyl-1-piperazinyl)-6,8-dioxabicyclo[3.2.1]oct-2-yl]urea	[M+2H]2+	C14H26N4O4		74.9										1.87849e+06	806532	289179	328944	699115	669003	1.09963e+06	667078	265905	261607	241817	250226	0.0429242	314.195
MP26482	5.831	726.509	Kailuin B	[M+H]+	C37H67N5O9	BUEPCZIHQZLYEQ-WYJARXQISA-N	74.9			Organic acids and derivatives	Peptidomimetics	Depsipeptides					1.15774e+07	1.42708e+07	1.48391e+07	7.02679e+06	9.58064e+06	4.21018e+06	4.43017e+06	5.29909e+06	8.8209e+06	8.63881e+06	8.49296e+06	8.8214e+06	0.0182842	725.494
MP2142	7.443	112.018	4-PYRIDYLTHIOUREA	[M+NH4]2+	C6H7N3S	HLOFIQOOOSRNFY-UHFFFAOYSA-N	74.7										1.119e+09	1.11774e+09	1.12228e+09	1.12453e+09	1.13719e+09	1.10451e+09	1.11876e+09	1.12901e+09	1.11551e+09	1.14968e+09	1.11517e+09	1.12109e+09	0.0146058	153.036
MP2916	1.189	132.065	Hypro	[M+H]+	C5H9NO3	PMMYEEVYMWASQN-UHFFFAOYSA-N	74.7	HMDB0000725	C01157	Organic acids and derivatives	Carboxylic acids and derivatives	Amino acids, peptides, and analogues	Peptides	Amino acids	Other amino acids		219821	1.11866e+06	4.13053e+06	3.30075e+06	992181	521220	3.06517e+06	676454	1.89006e+06	1.89248e+06	1.85058e+06	1.89168e+06	0.0108641	131.058
MP7547	5.36	234.161	1-Cyclohexyl-3-(4-pyridinylmethyl)urea	[M+H]+	C13H19N3O		74.6										1.17215e+06	745525	1.56275e+06	1.22091e+07	1.45557e+06	3.87741e+06	1.92665e+06	9.58988e+06	3.92241e+06	3.92215e+06	3.96363e+06	3.95088e+06	0.00529355	233.153
MP25831	6.91	709.508	Bacilotetrin B	[M+H]+	C38H68N4O8	RCQCIWWLTXGNOL-UHFFFAOYSA-N	74.6			Organic acids and derivatives	Peptidomimetics	Depsipeptides					1.99563e+06	4.16027e+06	5.45826e+06	714146	4.18727e+06	3.46761e+06	6.77969e+06	5.52877e+06	1.93415e+06	1.5202e+06	657974	2.06177e+06	0.410756	708.504
MP28002	5.385	767.511	Ribifolin	[M+H]+	C37H66N8O9	GTVSYNGJUDFPDL-NGZZPPDDSA-N	74.6			Organic acids and derivatives	Carboxylic acids and derivatives	Amino acids, peptides, and analogues					2.65938e+07	3.566e+07	3.44419e+07	2.46404e+07	5.44951e+06	3.68699e+06	5.65157e+06	5.63652e+06	2.04245e+07	2.04208e+07	2.00404e+07	2.03991e+07	0.00922707	766.495
MP1745	7.449	102.034	Isopropyl Isothiocyanate	[M+H]+	C4H7NS	VHBFEIBMZHEWSX-UHFFFAOYSA-N	74.5	HMDB0303243		Organosulfur compounds	Isothiocyanates						3.69695e+08	3.7207e+08	3.83385e+08	3.81373e+08	3.62518e+08	3.53693e+08	3.98062e+08	3.79204e+08	3.74316e+08	3.71381e+08	3.7138e+08	3.72516e+08	0.00372214	101.03
MP2006	3.976	109.101	bicyclo[2.2.2]oct-2-ene	[M+H]+	C8H12	VIQRCOQXIHFJND-UHFFFAOYSA-N	74.5			Hydrocarbons	Polycyclic hydrocarbons						3.12838e+06	3.13607e+06	2.91119e+06	3.25999e+06	3.22747e+06	2.66645e+06	3.22456e+06	3.06569e+06	2.76305e+06	2.81422e+06	2.7452e+06	2.74458e+06	0.0118469	108.094
MP2729	7.584	126.972	Dimethyl trisulfide	[M+H]+	C2H6S3	YWHLKYXPLRWGSE-UHFFFAOYSA-N	74.4	HMDB0013780	C08372	Organosulfur compounds	Organic trisulfides						2.89171e+06	3.77105e+06	3.72174e+06	2.05515e+06	3.83393e+06	3.97088e+06	3.47909e+06	3.20593e+06	3.57607e+06	3.46241e+06	3.32268e+06	3.24811e+06	0.0429027	125.963
MP7124	4.01	225.112	Senkyunolide H	[M+H]+	C12H16O4	DQNGMIQSXNGHOA-RCBCECLLSA-N	74.4	HMDB0258236		Organoheterocyclic compounds	Isobenzofurans						158014	194125	3.97051e+06	5.0494e+06	1.10911e+06	1.25511e+06	5.00809e+06	166014	253016	1.71724e+06	1.72064e+06	1.71982e+06	0.541969	224.105
MP15911	5.291	445.339	10,16-dihydroxy-4,5,13,19,20-pentamethyl-24-oxahexacyclo[15.5.2.0,.0,.0,.0,]tetracosan-23-one	[M+H]+	C28H44O4		74.4										1.77726e+06	862337	1.92732e+06	9.23721e+06	127065	12475.5	83079.6	1.36306e+06	1.45764e+06	1.42357e+06	1.36198e+06	1.38326e+06	0.0302414	444.324
MP15046	3.71	421.253	1-Cyclohexyl-3-(2H-tetrazol-5-yl)urea	[M+H]2+	C8H14N6O		74.4										3.00311e+06	1.99268e+06	1.68962e+06	848216	721142	695544	770485	534638	1.33045e+06	1.37102e+06	1.32946e+06	1.52493e+06	0.0667317	210.123
MP18761	4.377	521.328	Phlegmariurine C	[M+H]+	C32H44N2O4	MJIROACEKGJSGD-OSPQMSIKSA-N	74.4			Lipids and lipid-like molecules	Fatty Acyls	Eicosanoids					1.37019e+07	2.02178e+07	2.10013e+07	1.44057e+07	2.33896e+06	1.47512e+06	2.05653e+06	1.94319e+06	1.04911e+07	1.03831e+07	1.03648e+07	1.03648e+07	0.00584014	520.33
MP10447	6.182	299.257	RG1300000	[M+H]+	C18H34O3		74.3										5.57141e+06	4.19068e+06	5.79574e+06	5.1958e+06	8.30613e+06	7.61006e+06	8.34219e+06	8.49792e+06	7.05143e+06	7.1186e+06	7.04763e+06	7.11876e+06	0.00563995	298.251
MP1827	7.453	104.03	(Methylamino)(oxo)acetic acid	[M+H]2+	C3H5NO3	FMNLVGDFBCBTJZ-UHFFFAOYSA-N	74.3			Organic acids and derivatives	Carboxylic acids and derivatives	Amino acids, peptides, and analogues					5.31284e+06	6.30415e+06	4.885e+06	6.29231e+06	6.6461e+06	6.43917e+06	5.8612e+06	6.73444e+06	5.76521e+06	6.26616e+06	5.65755e+06	6.33673e+06	0.0573893	103.027
MP3115	4.122	137.008	fonofos	[M+H]+	C10H15OPS2	KVGLBTYUCJYMND-UHFFFAOYSA-N	74.3		C18987	Benzenoids	Benzene and substituted derivatives						185146	509107	280871	277147	555176	399035	193852	483885	385401	379199	373977	364562	0.0234694	246.03
MP6429	2.441	210.169	2,6-BIS-(DIMETHYLAMINOMETHYL)-3-PYRIDINOL	[M+H]+	C11H19N3O	OYTNPZVGHDQVGL-UHFFFAOYSA-N	74.3										2.94244e+06	3.64794e+06	3.44352e+06	3.39737e+06	2.75637e+06	2.59318e+06	2.51462e+06	2.58623e+06	1.565e+06	1.55965e+06	1.56498e+06	1.55001e+06	0.004529	209.153
MP7230	4.438	227.127	(1r,4as,5r,7r,7ar)-1-ethoxy-5-hydroxy-7-methyl-1h,4ah,5h,6h,7h,7ah-cyclopenta[c]pyran-4-carbaldehyde	[M+H]+	C12H18O4	WQULNIFIWNOOTN-BVNKDQMESA-N	74.2			Lipids and lipid-like molecules	Prenol lipids	Monoterpenoids					310244	417138	946284	1.19607e+06	268429	290520	974303	217957	566157	570639	583495	563316	0.0156252	226.121
MP12153	6.497	342.227	1-(adamantan-1-yl)-3-[(4-carbamimidamidophenyl)methyl]urea	[M+H]+	C19H27N5O	YQPLKJCBEOVDBS-UHFFFAOYSA-N	74.2			Benzenoids	Benzene and substituted derivatives						1.47952e+06	1.31667e+06	3.57562e+06	4.66879e+06	4.10073e+06	2.1091e+06	5.42727e+06	1.43809e+06	2.75731e+06	2.9115e+06	2.75338e+06	2.79077e+06	0.0264331	341.222
MP11876	5.101	335.221	7-hydroxy-1,4a-dimethyl-9-oxo-7-(propan-2-yl)-1,2,3,4,4a,4b,5,6,7,9,10,10a-dodecahydrophenanthrene-1-carboxylic acid	[M+H]+	C20H30O4	UFEHYRPBLFGEJW-UHFFFAOYSA-N	74.1			Lipids and lipid-like molecules	Prenol lipids	Diterpenoids					1.10831e+07	5.64845e+06	7.82777e+06	5.16252e+06	5.91375e+06	2.53593e+06	3.52482e+06	5.1841e+06	5.80213e+06	5.82146e+06	5.85144e+06	5.84435e+06	0.00385498	334.214
MP1623	0.909	99.0134	MALEAMATE	[M+H]+		FSQQTNAZHBEJLS-UPHRSURJSA-N	74.1		C01596	Lipids and lipid-like molecules	Fatty Acyls	Fatty acids and conjugates					652742	979542	999215	1.00933e+06	806747	488837	1.06935e+06	922092	749444	952415	866121	957984	0.110676
MP3742	2.35	151.046	1-(2,4-Dihydroxyphenyl)-2-(4-fluorophenoxy)ethanone	[M+CH3OH+H]+	C14H11FO4	CBRIRMIPKKNABJ-UHFFFAOYSA-N	74										2.18388e+06	1.93748e+06	1.71827e+06	883261	571424	632301	334194	321492	837631	957375	959395	950525	0.0639027	262.064
MP7848	4.109	241.038	L-Cystine	[M+H]+	C6H12N2O4S2	LEVWYRKDKASIDU-IMJSIDKUSA-N	74	HMDB0000192	C00491	Organic acids and derivatives	Carboxylic acids and derivatives	Amino acids, peptides, and analogues					158720	209104	356300	243162	1.14638e+06	1.6515e+06	475594	592272	600858	583682	583721	584991	0.0142536	240.024
MP6755	3.353	217.097	6-Nitro-2,3,4,9-tetrahydro-1H-carbazole	[2M+H]+	C12H12N2O2	IROFVXNXPDWNEU-UHFFFAOYSA-N	74			Organoheterocyclic compounds	Indoles and derivatives	Carbazoles					8.10058e+06	1.22539e+06	2.13221e+06	1.62853e+06	1.36378e+06	1.09469e+06	1.10959e+06	1.42941e+06	2.30626e+06	2.35373e+06	2.29155e+06	2.26895e+06	0.0155554	216.09
MP15406	4.224	431.323	Hecogenin	[M+H]+	C27H42O4	IDZDIJBVDDHIIM-MWZFGUNWSA-N	74	HMDB0038824	C08902	Lipids and lipid-like molecules	Prenol lipids	Sesterterpenoids	Lipids	ST Sterol lipids	ST01 Sterols		1.00303e+06	1.38462e+06	2.06857e+06	3.70949e+06	9566.59	864546	44832	24038.4	820384	785213	820315	813231	0.0206502	430.308
MP18249	4.014	508.325	(3R,5R,6S,7S,9R,11E,13S,14R)-14-Ethyl-13-hydroxy-3,5,7,9,13-pentamethyl-2,4,10-trioxooxacyclotetradec-11-en-6-yl 3,4,6-trideoxy-3-(dimethylamino)-D-xylo-hexopyranoside	[M+Na]+	C28H47NO8	UZQBOFAUUTZOQE-SOSMEOBRSA-N	73.9			Organic oxygen compounds	Organooxygen compounds	Carbohydrates and carbohydrate conjugates					1.31919e+06	1.34464e+06	1.31164e+06	882544	1.05222e+06	918666	728437	713179	1.01573e+06	983646	1.00301e+06	983054	0.0159564	525.33
MP24152	6.479	663.463	tris(2,4-di-tert-butylphenyl) phosphate	[M+H]+	C42H63O4P	AZSKHRTUXHLAHS-UHFFFAOYSA-N	73.8			Organic acids and derivatives	Organic phosphoric acids and derivatives	Phosphate esters					37289.9	29829.7	180001	30651.6	10442.8	1.85418e+06	1.08925e+06	1.26031e+06	61109	92832.3	141344	166403	0.410391	662.446
MP1409	6.412	94.0649	Aniline	[M+H]+	C6H7N	PAYRUJLWNCNPSJ-UHFFFAOYSA-N	73.8	HMDB0003012	C00292	Benzenoids	Benzene and substituted derivatives	Aniline and substituted anilines					124622	102118	125921	72496.1	83645.3	91924.9	146098	111594	78336.9	64549.7	89819.7	60772.9	0.181458	93.0578
MP27588	5.178	755.429	Ac-Thr(1)-D-Ile-Pro-Pro-N(Me)Tyr(Me)-aIle-(1)	[M+H]+	C39H58N6O9	WQAAJWSIZAAGHM-UDHIUKTBSA-N	73.7			Organic acids and derivatives	Peptidomimetics	Depsipeptides					6.34197e+06	9.33609e+06	8.09644e+06	5.60779e+06	1.15195e+06	674071	1.22847e+06	1.08757e+06	4.41647e+06	4.43117e+06	4.43049e+06	4.17156e+06	0.0292091	754.427
MP1749	3.116	102.034	N-[(3S)-2-Oxotetrahydro-3-furanyl]tridecanamide	[M+ACN+H]+	C17H31NO3		73.7										930442	9.91634e+06	3.98098e+06	3.01841e+06	2.85977e+06	674081	3.182e+06	2.32161e+06	2.81239e+06	2.49674e+06	2.94979e+06	2.61345e+06	0.0743508	297.23
MP13675	5.727	383.167	Isoneosolaniol	[M+H]+	C19H26O8	UROCTWOJYLMRHO-UHFFFAOYSA-N	73.6	HMDB0035201		Lipids and lipid-like molecules	Prenol lipids	Sesquiterpenoids					1.57554e+06	2.24364e+06	1.92606e+06	1.90342e+06	3.4676e+06	2.54004e+06	1.16206e+06	1.44098e+06	2.29932e+06	2.29902e+06	2.20844e+06	1.99497e+06	0.0652142	382.163
MP10527	5.389	301.215	Isoharziandione	[M+H]+	C20H28O2	PPAAOENVQWPYOV-UHFFFAOYSA-N	73.6			Organic oxygen compounds	Organooxygen compounds	Carbonyl compounds					2.45818e+08	2.35417e+07	1.10087e+08	5.09503e+07	3.81011e+07	1.0029e+07	8.16033e+06	5.66907e+07	6.77789e+07	6.82165e+07	6.77808e+07	7.04687e+07	0.018789	300.209
MP4671	3.044	171.993	3-Chloro-6-fluoro-1,2-benzoxazole	[M+H]+	C7H3ClFNO	KOCRLZPOPOTYCU-UHFFFAOYSA-N	73.6			Organoheterocyclic compounds	Benzisoxazoles						1.59931e+06	1.50992e+06	1.62516e+06	1.62976e+06	2.26138e+06	1.64873e+06	1.46653e+06	1.70444e+06	1.62651e+06	1.50462e+06	1.65577e+06	1.50537e+06	0.05054	170.989
MP17996	4.614	501.32	(2S,8xi,9beta,16alpha,17xi)-2,16,20,25-Tetrahydroxy-9,10,14-trimethyl-4,9-cyclo-9,10-secocholest-5-ene-1,11,22-trione	[M+H]+	C30H46O7		73.6										1.933e+06	3.29453e+06	17109.8	1.6061e+06	3.08794e+06	854472	27270.6	399713	1.20376e+06	1.20501e+06	1.08213e+06	1.09484e+06	0.0585454	518.324
MP2362	2.345	117.091	4-Hydroxyhexan-3-one	[M+H]+	C6H12O2	SKCYVGUCBRYGTE-UHFFFAOYSA-N	73.5		C02948	Organic oxygen compounds	Organooxygen compounds	Carbonyl compounds	Lipids	FA Fatty acyls	FA12 Oxygenated hydrocarbons		516705	716051	1.04596e+06	1.04313e+06	1.11339e+06	568787	752014	918919	805362	832711	805211	805258	0.01689	116.084
MP13545	3.716	379.148	Holostyligone, (-)-	[M+Na]+	C21H24O5	LBJCQKYBKIAWHJ-XAAFQQQXSA-N	73.5			Lignans, neolignans and related compounds	Aryltetralin lignans						6.16237e+06	1.17638e+07	9.1078e+06	9.3358e+06	1.29039e+06	728943	614668	659523	4.92152e+06	5.12754e+06	5.12519e+06	4.9231e+06	0.0234493	356.162
MP7865	6.322	241.227	oxacyclohexadecan-2-one	[M+H]+	C15H28O2	FKUPPRZPSYCDRS-UHFFFAOYSA-N	73.5			Phenylpropanoids and polyketides	Macrolides and analogues						6.43845e+06	1.00554e+07	1.29186e+07	1.67829e+07	1.79235e+07	1.51614e+07	6.67651e+06	6.68174e+06	1.14384e+07	1.15771e+07	1.14279e+07	1.18892e+07	0.0185685	240.209
MP12461	3.42	350.206	(4-benzoylpiperidino)[4-(tert-butyl)phenyl]methanone	[2M+H]+	C23H27NO2		73.5										1.91767e+06	1.38294e+06	1.20843e+06	1.38931e+06	2.26176e+06	1.32936e+06	2.16701e+06	1.35552e+06	1.1661e+06	1.17935e+06	1.10312e+06	1.17235e+06	0.0304333	349.204
MP8504	3.521	255.17	2-[(3S)-1-Isopropyl-3-pyrrolidinyl]-1H-benzimidazole-5-carbonitrile	[M+H]+	C15H18N4		73.5										4912.86	208511	119427	142114	295947	234426	15882.8	110399	87914.3	121194	85774.3	88604.9	0.176533	254.153
MP3803	2.848	152.128	1-cyclopentyl-5-pyrazolamine	[M+NH4]+	C8H13N3		73.4										514390	1.24699e+06	1.80155e+06	173729	1.80728e+06	780791	1.2037e+06	1.57334e+06	1.29894e+06	1.29912e+06	1.30102e+06	1.08522e+06	0.0860645	151.111
MP11113	5.85	316.284	Panamine	[M+H]+	C20H33N3	MRLGBUWOAFGOBH-LYFDQMJQSA-N	73.4		C10778								1.9806e+07	7.60968e+06	5.51073e+06	1.31182e+07	5.77574e+06	7.34992e+06	3.40555e+06	1.98701e+07	9.83486e+06	9.83497e+06	9.83395e+06	1.03013e+07	0.0234501	315.267
MP8197	3.12	248.149	N-Benzyl-1-(1-naphthyl)methanamine	[M+H]+	C18H17N		73.4										1.1312e+06	1.74778e+06	2.22965e+06	1.45176e+06	2.74961e+06	1.62892e+06	2.19766e+06	1.8344e+06	1.9317e+06	1.97599e+06	1.96406e+06	1.78747e+06	0.0453969	247.136
MP8157	0.68	247.165	4-[5]-ladderane-butanoic acid	[M+H]+	C16H22O2	ZDWWCRQXNJGGFF-UHFFFAOYSA-N	73.3			Lipids and lipid-like molecules	Fatty Acyls	Fatty acids and conjugates					74979.3	605241	345478	145561	1.4983e+06	55278.9	130766	106596	197310	199830	206099	235974	0.0850042	246.162
MP6803	5.854	218.124	securinine	[M+H]+	C13H15NO2	SWZMSZQQJRKFBP-UHFFFAOYSA-N	73		C10614	Organoheterocyclic compounds	Indolizidines						3.19739e+06	2.22931e+06	2.18693e+06	1.58524e+06	2.85025e+06	4.3959e+06	3.37307e+06	5.42203e+06	2.78625e+06	2.98233e+06	2.70574e+06	2.70405e+06	0.0468422	217.11
MP16043	7.406	449.154	Archangelicine	[2M+Na]+	C24H26O7	RVGGCRQPGKFZDS-AKRYRNCVSA-N	73			Phenylpropanoids and polyketides	Coumarins and derivatives	Furanocoumarins					2.50383e+06	1.36086e+06	69825.1	117323	90633.2	954512	6479.49	8.99137e+06	91982.5	1.72397e+06	93040.1	1.38146e+06	1.03884	426.168
MP11819	4.031	334.237	Stearidonoyl glycine	[M+CH3OH+H]+	C20H31NO3	DSUOLDCTHRQBTI-LTKCOYKYSA-N	72.9			Organic acids and derivatives	Carboxylic acids and derivatives	Amino acids, peptides, and analogues					7.24651e+06	202988	936690	371410	1.70283e+06	29292.6	20598.5	197165	2.47424e+06	2.47406e+06	2.45966e+06	2.42143e+06	0.0101336	333.23
MP10638	5.279	304.226	4-Methoxy PV9	[M+ACN+H]+	C19H29NO2	TVTBLEFOUUDRBK-UHFFFAOYSA-N	72.9										2.4933e+06	2.55345e+06	4.29458e+06	2.52036e+06	6.38077e+06	2.65291e+06	2.21886e+06	3.08986e+06	3.76166e+06	3.6161e+06	3.71234e+06	3.7599e+06	0.0183732	303.22
MP9701	4.615	281.258	chaulmoogric acid	[M+H]+	C18H32O2	XMVQWNRDPAAMJB-KRWDZBQOSA-N	72.9		C08282	Lipids and lipid-like molecules	Fatty Acyls	Fatty acids and conjugates	Lipids	FA Fatty acyls	FA01 Fatty Acids and Conjugates		829603	1.48746e+06	2.80193e+06	1.70293e+06	5.09219e+06	1.49603e+06	868842	2.07443e+06	1.90418e+06	1.80883e+06	1.80846e+06	1.83516e+06	0.0245297	280.24
MP9154	4.4	269.135	()-phenylethyl-8-O--L-rhamnopyranoside	[M+H]+	C14H20O5		72.8										3.57103e+06	408142	4.05534e+06	3.2415e+06	5.85877e+06	4.15765e+06	1.26503e+06	5.9902e+06	2.85893e+06	2.73146e+06	2.73069e+06	2.74084e+06	0.0225901	268.131
MP2059	7.779	110.02	N-Methylmethanesulfonamide	[M+Na]+	C2H7NO2S	UHNHTTIUNATJKL-UHFFFAOYSA-N	72.8										1.1137e+09	1.09905e+09	4.61531e+08	1.22644e+09	1.10666e+09	1.27528e+09	1.33497e+09	4.07147e+08	1.30485e+09	1.15518e+09	1.12429e+09	1.12463e+09	0.0733059	109.02
MP11325	4.329	321.205	(1R,4S,5R,9S,10S,13R,14R)-14-hydroxy-5,9-dimethyl-2-oxotetracyclo[11.2.1.01,10.04,9]hexadecane-5-carboxylic acid	[M+H]+	C19H28O4	DCHODBHTJLPAJL-WJNDYHRLSA-N	72.8			Organoheterocyclic compounds	Dihydrofurans						671740	874535	813143	1.08756e+06	1.26288e+06	724157	996048	2.78196e+06	1.04549e+06	1.04543e+06	1.05424e+06	1.08278e+06	0.0167353	320.199
MP16841	5.217	471.339	11-Keto-beta-boswellic acid	[M+H]+	C30H46O4	YIMHGPSYDOGBPI-DXVVRMJRNA-N	72.7	HMDB0036671		Lipids and lipid-like molecules	Prenol lipids	Triterpenoids					7.9798e+06	1.14162e+07	1.20082e+07	7.50964e+06	4.17987e+06	1.39878e+06	4.04405e+06	4.201e+06	6.88271e+06	6.81539e+06	6.76386e+06	6.76319e+06	0.00830282	470.34
MP3464	7.314	144.982	5,6-Difluoro-1,3-benzothiazol-2-amine	[M+H]+	C7H4F2N2S	LTJNALXNNMUKHU-UHFFFAOYSA-N	72.6										1.40062e+07	1.2103e+07	1.59641e+07	1.08486e+07	9.71546e+06	1.13534e+07	1.3509e+07	8.56245e+06	1.50494e+07	1.33515e+07	8.27001e+06	1.59399e+07	0.260603	186.006
MP12433	5.884	349.236	4a-hydroxy-10a-methoxy-4,4,7,11b-tetramethyl-1h,2h,3h,5h,6h,6ah,7h,11h,11ah-phenanthro[3,2-b]furan-9-one	[M+H]+	C21H32O4	VINXKOZSSIAGKQ-UHFFFAOYSA-N	72.6			Organoheterocyclic compounds	Naphthofurans						1.09509e+07	3.18757e+06	7.13349e+06	4.44481e+06	5.34677e+06	590308	2.07661e+06	4.15267e+06	4.66528e+06	4.6273e+06	4.60322e+06	4.71093e+06	0.0101122	348.23
MP11873	5.878	335.221	Tianchimycin A	[M+H]+	C20H30O4	WDMWTIKQIXSBFK-UHFFFAOYSA-N	72.6			Phenylpropanoids and polyketides	Macrolides and analogues						9.17895e+06	3.87892e+06	7.64079e+06	4.24438e+06	4.31258e+06	786845	759401	2.57938e+06	4.22046e+06	4.28014e+06	4.21819e+06	4.43686e+06	0.0239496	334.214
MP16707	6.22	467.338	Nannosterol B	[M+H]+	C27H46O6	FCMVNJHRHVLHOT-WEIUGWSLSA-N	72.5										2.45349e+07	3.57561e+07	2.12099e+07	2.03559e+07	2.40959e+06	453908	2.14751e+06	2.94016e+06	1.35244e+07	1.26011e+07	1.44198e+07	1.43845e+07	0.0626562	466.329
MP5997	7.406	200.972	1-(4-Bromo-2-fluorophenyl)ethanamine	[M+H]+	C8H9BrFN	BRPFKIPSXUHGSH-UHFFFAOYSA-N	72.5										2.53534e+06	2.5227e+06	2.49846e+06	2.52003e+06	2.53711e+06	2.45282e+06	2.44258e+06	2.39309e+06	2.52953e+06	2.52888e+06	2.43634e+06	2.51368e+06	0.0177656	216.99
MP4720	7.617	172.956	Methylenebis[methyl disulfide]	[M+H]+	C3H8S4	VDSAPPVDLHMMGQ-UHFFFAOYSA-N	72.4			Organosulfur compounds	Organic disulfides	Dialkyldisulfides					3.55384e+06	3.50021e+06	3.49788e+06	3.38046e+06	3.62766e+06	3.26775e+06	2.80477e+06	3.00304e+06	3.58374e+06	3.57689e+06	3.49274e+06	3.37274e+06	0.0280392	171.951
MP10532	6.21	301.215	17-Epimethandienone	[M+Na]+	C20H28O2	XWALNWXLMVGSFR-NSDIEPNESA-N	72.3			Lipids and lipid-like molecules	Steroids and steroid derivatives	Androstane steroids					6.64346e+06	2.63226e+06	3.3877e+06	986594	1.70082e+06	1.1823e+06	744400	5.13835e+06	2.71654e+06	2.87247e+06	2.71622e+06	2.76882e+06	0.0265784	300.209
MP7761	4.001	239.089	4,8-Dihydroxy-7-(hydroxymethyl)-6-methoxy-3,4-dihydro-1(2H)-naphthalenone	[M+ACN+H]+	C12H14O5		72.3										1.1638e+06	496749	830779	1.00543e+06	1.23355e+06	1.71664e+06	1.48687e+06	1.78092e+06	2.32872e+06	2.82276e+06	2.95954e+06	2.96617e+06	0.108716	238.084
MP8345	2.77	252.145	(2E)-3-phenyl-N-(2-phenylethyl)prop-2-enamide	[M+H]+	C17H17NO	BOSUEWCVNFFBGV-UHFFFAOYSA-N	72.2			Phenylpropanoids and polyketides	Cinnamic acids and derivatives	Cinnamic acid amides					370328	564522	783234	539386	395099	245355	206645	6726.68	286228	274897	291994	282653	0.0251947	251.131
MP4677	3.424	172.096	(1S,2R)-2-Carbamoylcyclohexanecarboxylic acid	[M+CH3OH+H]+	C8H13NO3	LNNRRNLGMOUZCT-RITPCOANSA-N	72.2			Organic acids and derivatives	Carboxylic acids and derivatives	Carboxylic acid derivatives					155924	259270	230287	160955	965219	266697	42687.4	35228.6	321264	298911	298721	298808	0.0368741	171.09
MP1624	7.773	99.0135	Maleic anhydride	[M+H]+	C4H2O3	FPYJFEHAWHCUMM-UHFFFAOYSA-N	72.2	HMDB0254311		Organoheterocyclic compounds	Dihydrofurans	Furanones					1.92484e+07	2.49658e+07	1.08236e+07	2.54575e+07	2.30701e+07	2.30312e+07	1.73931e+07	3.40928e+07	1.64753e+07	2.29555e+07	1.69495e+07	1.56896e+07	0.184973	98.0004
MP9447	5.171	275.164	14-ethoxycacalol	[M+H]+	C17H22O3	GXOYEIHAHWMTBJ-UHFFFAOYSA-N	72.1			Lipids and lipid-like molecules	Prenol lipids	Sesquiterpenoids					3.27497e+06	1.854e+06	1.85097e+06	757573	584094	584848	542031	798229	1.33952e+06	1.35029e+06	1.35139e+06	1.33948e+06	0.00488063	274.157
MP2060	7.407	110.02	5-Methyl-uridine	[M+H]+		DWRXFEITVBNRMK-JXOAFFINSA-N	71.9	HMDB0000884		Nucleosides, nucleotides, and analogues	Pyrimidine nucleosides						3.772e+08	5.94524e+08	3.11643e+08	3.22446e+08	2.21642e+08	2.45464e+08	1.98334e+08	1.78635e+08	3.26048e+08	3.29613e+08	2.36506e+08	2.28036e+08	0.19746
MP4680	6.209	172.133	(5Z)-3-aminonon-5-enoic acid	[M+NH4]+	C9H17NO2	FBJHAMGGVKCNEB-PLNGDYQASA-N	71.9			Organic acids and derivatives	Carboxylic acids and derivatives	Amino acids, peptides, and analogues					923616	922578	745447	1.21522e+06	1.25825e+06	1.50245e+06	1.13265e+06	3.59709e+06	1.27136e+06	1.27098e+06	1.20377e+06	1.23437e+06	0.0261613	171.126
MP11604	7.332	328.32	(2S,4E)-2-Amino-4-icosene-1,3-diol	[M+H]+	C20H41NO2		71.9										1.8123e+06	531119	1.31253e+06	462429	1.03285e+06	1.81266e+06	3.47959e+06	3.7452e+06	1.63862e+06	1.55489e+06	1.55473e+06	1.63902e+06	0.0303737	327.314
MP2246	7.444	114.016	[(5-Amino-1H-1,2,4-triazol-3-yl)sulfanyl]acetonitrile	[M+H]2+	C4H5N5S		71.8										3.73006e+07	3.48564e+07	3.73016e+07	3.83666e+07	3.75484e+07	3.78928e+07	3.72062e+07	3.62439e+07	3.91454e+07	3.86585e+07	3.8085e+07	3.75314e+07	0.0182377	155.027
MP9521	4.689	277.127	Lenalidomide	[M+H]+	C13H13N3O3	GOTYRUGSSMKFNF-UHFFFAOYSA-N	71.7	HMDB0014623		Organoheterocyclic compounds	Isoindoles and derivatives	Isoindolines					787832	2.01321e+06	2.20014e+06	1.97186e+06	2.30212e+06	2.50909e+06	1.44935e+06	1.44563e+06	2.66333e+06	2.59418e+06	2.45442e+06	2.57363e+06	0.0337987	259.096
MP12503	4.81	351.216	(1s,4as,4br,8as,10ar)-8a-hydroxy-7-(2-hydroxypropan-2-yl)-1,4a-dimethyl-6-oxo-2,3,4,4b,5,9,10,10a-octahydrophenanthrene-1-carboxylic acid	[M+H]+	C20H30O5	DTSBZAXGKNOGOS-XEGUMIITSA-N	71.7			Lipids and lipid-like molecules	Prenol lipids	Diterpenoids					4.48346e+06	5.22816e+06	5.64026e+06	2.16488e+06	3.49136e+06	1.4406e+06	1.77395e+06	2.38592e+06	3.50698e+06	3.54125e+06	3.56618e+06	3.566e+06	0.00789413	350.209
MP8874	4.108	262.987	3-(5-Bromo-1H-indol-3-yl)-3-oxopropanenitrile	[M+H]+	C11H7BrN2O	JNOHABODURGTQE-UHFFFAOYSA-N	71.7										1.18935e+06	1.42002e+06	1.35536e+06	1.42256e+06	1.26792e+06	1.58959e+06	1.43297e+06	1.59259e+06	1.39818e+06	1.43073e+06	1.38463e+06	1.38463e+06	0.0155422	261.974
MP10185	4.278	293.174	(2r)-1-(5-hydroxy-7-methoxy-2,2-dimethyl-3,4-dihydro-1-benzopyran-8-yl)-2-methylbutan-1-one	[M+H]+	C17H24O4	LYRVZEIWKNTUGC-SNVBAGLBSA-N	71.7			Organoheterocyclic compounds	Benzopyrans	1-benzopyrans					2.00232e+06	1.13431e+06	1.84313e+06	706953	1.23975e+06	1.08317e+06	1.25222e+06	1.04578e+06	1.17175e+06	1.10003e+06	1.10025e+06	1.10063e+06	0.0319455	292.167
MP20569	4.529	567.287	Ouabain	[M+Na]+	C29H44O12	LPMXVESGRSUGHW-HBYQJFLCSA-N	71.5	HMDB0015224	C01443	Benzenoids	Naphthalenes		Steroids	23-Carbon atoms	Cardanolide derivatives		6.30573e+06	9.30973e+06	8.23328e+06	4.92613e+06	1.04176e+06	462452	496550	778065	3.77852e+06	3.94845e+06	3.77874e+06	3.7788e+06	0.0222144	584.283
MP9351	5.222	273.096	3-Deaza-2'-deoxyadenosine	[M+H]+	C11H14N4O3	KMQPIRJQPAVGJL-DJLDLDEBSA-N	71.5			Nucleosides, nucleotides, and analogues	Imidazole[4,5-c]pyridine ribonucleosides and ribonucleotides						2.47719e+06	3.26109e+06	4.50971e+06	2.93437e+06	4.44676e+06	2.07035e+06	1.83487e+06	1.73793e+06	2.87729e+06	2.8326e+06	2.85675e+06	2.88779e+06	0.00850784	250.107
MP5038	1.049	180.076	fudosteine	[2M+NH4]+	C6H13NO3S	KINWYTAUPKOPCQ-UHFFFAOYSA-N	71.4	HMDB0252511		Organic acids and derivatives	Carboxylic acids and derivatives	Amino acids, peptides, and analogues					2.40678e+06	6.16675e+06	6.85693e+06	5.78929e+06	124827	391382	345047	354449	2.67139e+06	2.70235e+06	2.46798e+06	2.70271e+06	0.0428818	179.062
MP11160	3.757	317.156	cinchonine	[M+Na]+	C19H22N2O	KMPWYEUPVWOPIM-LSOMNZGLSA-N	71.2		C06528	Alkaloids and derivatives	Cinchona alkaloids		Alkaloids	Alkaloids derived from tryptophan and anthranilic acid	Quinoline alkaloids		8.96018e+06	1.75188e+07	2.8275e+07	2.49488e+07	2.11035e+06	1.12902e+06	1.44559e+06	1.84415e+06	1.06979e+07	1.10623e+07	1.10622e+07	1.09658e+07	0.0157299	294.173
MP16976	3.687	475.324	1-methyl-3a-({5-methyl-10-oxa-7-azaheptacyclo[12.6.2.0,.0,.0,.0,.0,]docos-15-en-15-yl}methyl)-2,3,7,7a-tetrahydroindol-6-one	[M+H]+	C31H42N2O2		71.2										5.6053e+06	7.44768e+06	1.95274e+07	6.36175e+06	5.0755e+06	4.6571e+06	4.21066e+06	6.57377e+06	7.53969e+06	7.60961e+06	7.5568e+06	7.59547e+06	0.00430742	474.325
MP1748	3.283	102.034	Methyl L-serinate	[M+H-H2O]+	C4H9NO3	ANSUDRATXSJBLY-VKHMYHEASA-N	71.2			Organic acids and derivatives	Carboxylic acids and derivatives	Amino acids, peptides, and analogues					706261	1.3047e+06	1.71054e+06	2.59613e+06	7.17944e+06	4.05525e+06	3.06159e+07	1.0651e+07	1.17104e+06	3.36405e+06	4.09794e+06	2.24219e+06	0.472033	119.058
MP19887	5.992	549.397	17-epi-nandrolone	[2M+Na]+	C18H26O2	NPAGDVCDWIYMMC-SHRADXDESA-N	71.1			Lipids and lipid-like molecules	Steroids and steroid derivatives	Estrane steroids					4.18916e+06	2.7633e+07	3.20459e+07	1.89293e+07	2.64836e+06	1.00526e+06	2.14771e+06	1.96723e+06	1.12344e+07	1.12364e+07	1.0852e+07	8.72459e+06	0.114646	274.193
MP5480	1.163	189.112	3-Methylsubericacid	[M+H]+	C9H16O4	QIOYMVALOOEDDF-ZETCQYMHSA-N	71	HMDB0059783		Lipids and lipid-like molecules	Fatty Acyls	Fatty acids and conjugates					271854	3.97096e+06	2.69553e+06	773464	1.27685e+07	372003	562582	284368	2.7149e+06	2.74062e+06	2.73159e+06	2.72692e+06	0.00392255	188.105
MP24150	5.334	663.428	Prostaglandin E2-biotin	[M+Na]+	C35H58N4O6S	PREZBUUQJJPPFV-VTPUZKRBSA-N	71										9.96016e+06	2.13145e+07	2.27774e+07	1.32838e+07	3.05835e+06	1.62527e+06	2.42822e+06	1.34439e+06	1.1221e+07	1.16337e+07	1.10293e+07	1.10332e+07	0.025296	662.408
MP1750	0.757	102.055	3-AMINOADIPIC ACID	[M+H]+	C6H11NO4	XABCFXXGZPWJQP-UHFFFAOYSA-N	71	HMDB0245812		Organic acids and derivatives	Carboxylic acids and derivatives	Amino acids, peptides, and analogues					2.48798e+06	757425	837918	1.92378e+06	2.69364e+06	1.3227e+06	1.25457e+06	2.10639e+06	2.05692e+06	1.91452e+06	1.9164e+06	1.91483e+06	0.0363143	161.069
MP9254	1.033	271.103	4-Nitro-N-(1-phenylethyl)benzamide	[M+Na]+	C15H14N2O3	OTZYXPKYOAAGEU-UHFFFAOYSA-N	71										108719	280459	705715	544863	20012.3	76309.1	390428	71044.5	257841	257889	257766	275392	0.0334831	270.1
MP24553	6.776	674.458	4-((9S,10R,17S)-10-((E)-(decylimino)methyl)-3-(((2R,4S,5S,6R)-4,5-dihydroxy-6-methyltetrahydro-2H-pyran-2-yl)oxy)-5,14-dihydroxy-13-methylhexadecahydro-1H-cyclopenta[a]phenanthren-17-yl)furan-2(5H)-one	[M+H]+	C39H63NO8	VVPXASQNOLYBCR-DYPVWMHDSA-N	70.9			Lipids and lipid-like molecules	Steroids and steroid derivatives	Steroid lactones					4.51104e+06	9.03876e+06	4.97967e+06	3.51053e+06	316893	137420	266870	84737.4	2.52202e+06	2.46354e+06	2.11443e+06	2.52133e+06	0.0814285	673.455
MP12741	3.51	357.166	Citrifelin B	[M+H]+	C21H24O5	XTDORSAGLFPXGX-IBGZPJMESA-N	70.8			Phenylpropanoids and polyketides	Linear 1,3-diarylpropanoids	Cinnamylphenols					3.03333e+06	6.52236e+06	6.44582e+06	5.58278e+06	525598	359327	330975	421536	2.85256e+06	3.0222e+06	3.02254e+06	3.02377e+06	0.028568	356.162
MP12582	4.67	353.194	vincarine	[M+H]+	C21H24N2O3	RLUORQGMBKDXPO-DOEBNNCYSA-N	70.8	HMDB0030389		Alkaloids and derivatives	Corynanthean-type alkaloids						1.01765e+06	2.38221e+06	585863	1.0427e+06	3.03567e+06	1.63579e+06	870853	1.28317e+06	1.55058e+06	1.63962e+06	1.55102e+06	1.56659e+06	0.0269121	352.179
MP3940	0.822	154.99	2',5-Dichloro-2-hydroxybenzophenone	[M+ACN+H]+	C13H8Cl2O2	OSXVZDOVYCTYCW-UHFFFAOYSA-N	70.7			Benzenoids	Benzene and substituted derivatives	Benzophenones					1.55734e+06	831037	851826	677246	758146	728960	4.45353e+06	1.53028e+06	2.79138e+06	2.30382e+06	2.50477e+06	2.86251e+06	0.0990475	265.99
MP10386	5.913	298.273	octadec-9-ynoic acid	[M+CH3OH+H]+	C18H32O2	RGTIBVZDHOMOKC-UHFFFAOYSA-N	70.7		C08459	Lipids and lipid-like molecules	Fatty Acyls	Fatty acids and conjugates	Lipids	FA Fatty acyls	FA01 Fatty Acids and Conjugates		1.77521e+06	1.3381e+06	1.94848e+06	1.79387e+06	3.15381e+06	3.5321e+06	3.09734e+06	5.21713e+06	3.02734e+06	2.77624e+06	2.89008e+06	2.72708e+06	0.0467714	280.24
MP6127	0.671	203.102	Tremetone	[M+H]+	C13H14O2	UVYUUQGGBNKRFU-UHFFFAOYSA-N	70.6	HMDB0259119	C08992	Benzenoids	Benzene and substituted derivatives	Acetophenones					500070	58775.3	87308.5	115943	655730	67331.5	90120.4	41151.1	98371.5	98281	71730.2	94100.1	0.1407	202.099
MP6169	7.479	203.971	6-Bromo-7-fluoro-1,2,3,4-tetrahydroquinoline	[M+H]+	C9H9BrFN	LFAMFIYRRFZFHT-UHFFFAOYSA-N	70.6										8.17966e+06	1.00192e+07	9.15138e+06	1.02509e+07	1.05666e+07	9.91818e+06	8.6998e+06	4.28585e+06	9.87692e+06	8.95744e+06	9.62169e+06	9.0457e+06	0.0475243	228.99
MP11813	3.823	334.129	4-{5-[(3S)-1-(4-Nitrobenzyl)-3-pyrrolidinyl]-1,3,4-oxadiazol-2-yl}pyridine	[M+CH3OH+H]+	C18H17N5O3		70.6										547613	1.05612e+06	833051	630728	1.63672e+06	1.01572e+06	607128	1.05881e+06	390083	395980	390083	404937	0.0177546	351.133
MP8324	5.323	251.164	2-[(1S,2S,4aR,8aS)-1-hydroxy-4a-methyl-8-methylidene-decahydronaphthalen-2-yl]prop-2-enoic acid	[M+NH4]+	C15H22O3		70.5										2.38986e+06	4.50653e+06	5.59094e+06	3.02033e+06	1.42076e+06	1.31953e+06	1.44018e+06	1.4629e+06	2.72772e+06	2.90926e+06	2.81769e+06	2.79368e+06	0.0267135	250.157
MP3738	3.41	151.035	1-Phenyl-3-(4H-1,2,4-triazol-4-yl)thiourea	[M+H]+	C9H9N5S	RZIFSZUVDCQREY-UHFFFAOYSA-N	70.5			Benzenoids	Benzene and substituted derivatives						1.48169e+07	216118	4.08791e+07	7357.91	2.9168e+06	1.78143e+07	2.65146e+07	5.67134e+07	2.16995e+07	1.36414e+07	2.02832e+07	1.89396e+07	0.188744	219.058
MP3332	0.944	142.05	Diethyl (aminomethylene)malonate	[M+H]+	C8H13NO4	WDTWMEZMHUEZKH-UHFFFAOYSA-N	70.4			Organic acids and derivatives	Carboxylic acids and derivatives	Dicarboxylic acids and derivatives					2.41418e+06	30718.6	26232.5	32329.9	65983.6	29048.5	44539.3	4052.37	302120	311400	297492	297517	0.0216815	187.084
MP11175	6.335	317.21	5,9,13-trimethyl-11-oxopentacyclo[11.2.1.0,.0,.0,]hexadecane-5-carboxylic acid	[M+H]+	C20H28O3		70.4										570220	57379.3	642255	60226.3	330008	59600.8	55123.4	103928	632187	504786	504389	542124	0.110288	316.204
MP7713	3.665	238.107	Fumariflorine	[M+H]+	C12H15NO4	BOZYJTCKDCTZDN-UHFFFAOYSA-N	70.3			Organoheterocyclic compounds	Benzodioxoles						9.57735e+06	5.47172e+07	1.47129e+07	1.6795e+07	4.47731e+07	2.70081e+07	1.20786e+07	5.00895e+07	2.8349e+07	2.84828e+07	2.85256e+07	2.83503e+07	0.00319785	237.1
MP21791	3.333	599.388	2,7,8-trihydroxy-3-tridecyl-6-undecyloxanthrene-1,4-dione	[M+H]+	C36H54O7	CVSBACKAPROJPF-UHFFFAOYSA-N	70.2			Benzenoids	Phenols	1-hydroxy-2-unsubstituted benzenoids					1.00405e+07	8.22605e+06	7.57568e+06	6.91829e+06	7.36782e+06	7.81124e+06	7.89258e+06	8.12448e+06	5.75208e+06	5.83266e+06	5.7779e+06	5.55659e+06	0.0209893	598.387
MP8405	4.518	253.179	3-[(1S)-1,2,4aalpha,5,6,7,8,8abeta-Octahydro-6beta-hydroxy-2beta,6-dimethylnaphthalene-1beta-yl]propionic acid	[M+H]+	C15H24O3	QXTBAOJTASJFAD-TZQJONAQSA-N	70.1			Organic oxygen compounds	Organooxygen compounds	Carbonyl compounds					1.21747e+06	2.66825e+06	2.32083e+06	742802	837137	188887	670373	1.22102e+06	1.19324e+06	1.2187e+06	1.21913e+06	1.19305e+06	0.012339	252.173
MP7683	3.761	237.169	Mintsulfide	[M+H]+	C15H24S	HVLGGQYBXOJMLO-QRTUWBSPSA-N	70	HMDB0038151		Lipids and lipid-like molecules	Prenol lipids	Sesquiterpenoids					3.73419e+06	4.37069e+06	4.23265e+06	4.40402e+06	2.72295e+06	2.89805e+06	2.55195e+06	2.65974e+06	2.07857e+06	2.02757e+06	2.05634e+06	2.02703e+06	0.0121607	236.16
MP0	0.829	70.0124		[M+H]+													25519.5	34515.2	153900	69949.3	119105	3919.35	23626.5	10913.6	68296.5	34423.7	31455.5	47821.9	0.368861
MP1	7.451	70.0125		[M+H]+													1.57273e+06	2.34739e+06	1.84754e+06	3.20525e+06	2.80971e+06	2.32899e+06	2.72881e+06	1.59537e+06	2.28405e+06	2.67651e+06	2.32967e+06	2.41889e+06	0.0722351
MP2	0.239	70.0125		[M+H]+													211584	67972.6	2.37038e+06	290856	134059	137431	208797	167665	92816.4	191311	188966	189842	0.29337
MP3	5.536	70.0398		[M+H]+													830395	1.06043e+06	908866	468573	171276	146676	197162	218800	523440	476059	494173	475121	0.0459131
MP4	5.211	70.0499		[M+H]+													155663	362169	562496	131656	8773.57	127550	11998.2	127549	60065.8	73146.6	74420.4	62713.5	0.10735
MP5	6.502	70.052		[M+H]+													577831	1.0126e+06	1.22901e+06	518388	14817.6	504238	123727	181470	247558	452839	503878	514296	0.289368
MP6	0.552	70.065		[M+H]+													69446.9	93673	36766.7	95209.2	28494.3	29969.6	125970	106707	50657.5	26241.5	20400.8	44540.1	0.4071
MP7	0.638	70.065		[M+H-H2O]+													331418	422074	768625	656433	51552.9	383848	293528	280022	399224	383015	393305	435339	0.056499
MP8	7.126	70.065		[M+H]+													53454.9	127837	20846.3	54602.7	278229	71367.5	99368	49307.7	73476.3	86165.6	79519.8	90804.7	0.0919797
MP9	6.653	70.1077		[M+H-H2O]+													36492.5	41925.8	18958.2	37397.7	12226.6	36883.9	15532.4	23405.5	16803.7	22912.1	15297.3	13908.9	0.230283
MP10	4.933	70.1445		[M+H]+													126674	155412	217959	152408	238974	65384.3	76376	29390.3	164953	142206	149800	142060	0.0718347
MP11	6.714	70.1593		[M+NH4]+													427056	1.14986e+06	927605	21662.5	64345.8	83002.6	78542	44467.6	57096.3	66825.4	128296	139049	0.427574
MP12	6.513	70.1593		[M+H]+													491266	722382	804532	41426.5	96943.2	559713	247409	48026.6	207254	94385.1	167808	65352.8	0.488375
MP14	4.706	70.1604		[M+H-H2O]+													61988.9	266672	360253	172793	115159	30375.2	91943.5	96220.4	48072.8	38293.1	32074.1	32569.1	0.196986
MP15	5.796	70.162		[M+H]+													110317	97848.9	194962	17259.6	205567	42210.7	126192	165394	178920	171803	150070	179003	0.0804686
MP18	5.866	70.215		[M+H]+													41272.1	31249	34214	34681.1	46778.4	15704.7	28373.8	39432.2	40033.3	34132.7	32347.6	40722.3	0.113949
MP19	6.151	70.2151		[M+H]+													186024	316540	499798	163912	35612.5	15259.6	21710	62131.3	152917	165067	152423	160241	0.0386595
MP21	6.36	70.2665		[2M+H]+													26181	63915.5	36594.3	29205.5	17337.4	17998.5	31809.9	24439.8	21070	20284.2	21467.3	19793.1	0.0365801
MP22	6.412	70.2708		[M+Na]+													26776.5	39063.3	23888.8	35324.6	17787.6	18722.6	24579.8	14854.9	22201.4	21389.1	22172.5	21217.5	0.0236885
MP23	4.751	70.2739		[M+H]+													1.78703e+06	3.21928e+06	3.57039e+06	2.25607e+06	154868	1.30149e+06	22502.5	21811.8	1.31112e+06	1.31108e+06	1.31102e+06	1.27424e+06	0.0141472
MP26	6.341	70.3272		[M+CH3OH+H]+													32204.3	64297	85759.4	27208.1	38813.1	11042	11792.9	34825	35136.3	27958.2	26530.1	27103.8	0.137503
MP27	6.128	70.3273		[M+H-H2O]+													72653.8	74845.3	255774	35175.4	69057.9	16193.6	59822.1	70823.1	73207.6	66529.6	66878.6	73735.2	0.0558677
MP31	4.715	70.3793		[M+H]+													499154	1.09425e+06	1.05852e+06	699063	37960.5	40412.9	13591.7	21453.5	147918	145615	196082	160215	0.143512
MP32	6.159	70.3853		[M+H]+													21653.1	26640.4	34795.9	23776.8	33924.6	10894.3	15433.1	32283.4	25901.9	20079.2	23743.3	19823.5	0.131734
MP36	4.821	70.4887		[M+H]+													395991	812471	559683	378830	64688.9	23645.5	12840.4	12508.6	247843	244956	238614	227482	0.0376501
MP38	6.197	70.4956		[M+ACN+H]+													825549	1.17461e+06	982905	263071	134155	164588	223085	272388	473598	466334	448785	483872	0.0315666
MP39	7.449	70.4957		[M+H]+													160421	112280	44743.4	48644	69494	28566.2	47526.4	52941.6	84532.5	103998	78091.3	73775.1	0.156897
MP41	0.577	70.5425		[M+H]+													670529	744174	640432	1.36286e+06	2.06453e+06	3.82422e+06	2.84045e+06	4.20871e+06	2.01232e+06	2.08819e+06	2.08826e+06	2.08822e+06	0.0183403
MP45	6.958	70.5692		[M+H]+													36708.1	29434.2	25162.6	18933.7	28873.7	97165.6	122280	283393	143707	168616	157683	182445	0.100743
MP48	3.332	70.5971		[M+H]+													59150.6	40936.7	14956.7	33025.1	42057.5	29054.3	22457.2	32788.1	8639.74	11180.6	10855	11199.1	0.11744
MP49	4.778	70.6003		[M+H]+													48765.8	122519	81961.9	36898.9	11283.9	28796.2	30929	7370.28	16771.3	21005.5	18443.8	16808.9	0.109058
MP50	6.197	70.607		[M+H]+													102106	248942	179960	32610.5	85819.1	13093	21568.8	26471.2	61375.6	29126	62646	63069.6	0.307736
MP59	3.868	70.7117		[M+Na]2+													5.48339e+06	4.04429e+06	3.27417e+06	1.48738e+06	1.56899e+06	1.36353e+06	957415	1.25555e+06	2.35502e+06	2.45831e+06	2.32371e+06	2.32299e+06	0.0270487
MP60	6.435	70.7186		[M+H]+													54439	170511	342418	45989.4	14704.9	20589.6	23765.2	35245.6	34188.8	38743.2	40458.2	27640.3	0.162405
MP61	6.863	70.7186		[M+H]+													130877	44798.2	337350	103345	14931.6	70931.7	25815.7	15490.1	24888.8	18094.7	18277.4	18179.8	0.168844
MP66	3.868	70.7674		[M+2H]2+													3.24332e+06	2.39003e+06	1.97727e+06	815725	884167	793507	533499	704667	1.33316e+06	1.39323e+06	1.35992e+06	1.34669e+06	0.0189595
MP68	6.56	70.774		[M+H]+													52045.9	33620.3	78626.8	35003.8	24468.6	20764.6	48198.1	18283.7	32462.1	48992.2	45665	49567	0.180966
MP69	6.999	70.7743		[M+H]+													28291.8	24793.4	27600.4	31970.3	22055.1	35294.5	20109.7	29588.5	23338.6	24564.2	29199.7	22743.6	0.117195
MP71	3.868	70.8231		[M+H]2+													1.06012e+06	827144	653839	250655	268991	222518	181950	221684	453320	453254	422561	446175	0.0328253
MP72	4.899	70.8244		[M+H]+													274025	413231	480429	261760	9076.29	162101	24632.8	162450	103172	108621	108562	97427.2	0.0510411
MP74	6.56	70.8306		[M+H]+													466448	2.60176e+06	2.15633e+06	545027	22207.4	29476.8	20199.4	14766.1	677126	457797	505325	461915	0.196595
MP75	6.831	70.8307		[M+H]+													423839	1.3806e+06	1.6607e+06	550758	43872.4	16208.8	16745.4	11709.5	84264.3	218426	247693	70949.5	0.58394
MP76	3.866	70.8788		[M+2H]2+													183140	117072	100631	34436.6	30200.7	63738.9	23584.9	28486.9	68851.8	69050.4	51106.4	67284.1	0.135479
MP77	6.546	70.8864		[M+CH3OH+H]+													162360	899250	1.41054e+06	70657.4	24492.4	66946.5	17845	17381.5	362494	362893	131010	165550	0.487667
MP79	6.314	70.9379		[M+2H]2+													589478	458955	434030	288022	179464	234227	44598.1	243966	164819	236589	203117	251526	0.180077
MP80	6.559	70.938		[M+H]+													1.07882e+06	29169.5	473337	46805.4	22248.1	210882	210881	210882	16542	17339.6	16238.5	16227.6	0.0315014
MP81	6.012	70.9406		[M+H]+													95496.3	284565	143085	26192.2	171697	23463.9	61182.2	122191	134997	120563	134926	132047	0.0524573
MP84	3.868	70.987		[M+2H]2+													940832	722469	548916	249374	281653	230878	195083	253488	433631	462271	492039	458587	0.051844
MP85	7.443	70.9913		[M+H]2+													4.12981e+06	3.61799e+06	3.64143e+06	3.82899e+06	1.45307e+06	3.86296e+06	2.62312e+06	2.80341e+06	3.69046e+06	3.72923e+06	3.5922e+06	3.59398e+06	0.018965
MP86	6.128	70.9938		[M+2H]2+													286210	33484	319029	32208.4	28471.9	49032.6	12418.2	39136.7	103221	98774.6	90716.1	105634	0.0658777
MP87	0.508	71.029		[M+2H]2+													9.03455e+06	1.00955e+07	5.27612e+06	5.68546e+06	6.70991e+06	5.42075e+06	1.66626e+06	4.1732e+06	5.83614e+06	5.84067e+06	5.79702e+06	5.82093e+06	0.00337934
MP88	5.028	71.0392		[M+H]+													86146.6	233437	322509	156613	13979.5	4934.89	5661.66	8718.41	33803.2	44204.3	44851.6	28762.3	0.209036
MP89	3.868	71.0428		[M+H]+													476540	508913	355066	165965	167019	139805	107155	144842	253488	260163	265834	266765	0.0234075
MP90	6.19	71.0848		[M+H]+													122283	46495.9	44106.8	53563.7	458032	238173	169025	185832	260518	242807	196228	260229	0.126275
MP91	4.49	71.085		[M+H]+													1.3612e+06	2.45282e+06	872444	1.80677e+06	1.27084e+06	301980	164087	430905	1.45311e+06	1.45332e+06	1.51634e+06	1.48262e+06	0.0203546
MP92	5.749	71.085		[M+2H]2+													30932.3	77933.2	75729	14507.7	104318	482972	131243	10904.1	180281	153131	150827	148450	0.0939646
MP93	5.818	71.085		[M+H]+													53079	38786.1	35815.1	238117	166771	339116	290338	387770	137240	113868	154855	162706	0.152382
MP94	4.599	71.085		[M+NH4]+													258856	310258	332538	376472	335091	723670	311423	248265	343273	346035	349813	202225	0.232406
MP95	4.94	71.0851		[M+H]+													23782.8	30057.5	23645.8	69198.1	64913.6	136354	17264.7	13883.4	24385.1	24327.6	23243.1	17672.5	0.142802
MP96	6.134	71.0851		[M+H]+													27938.9	33258.3	36947.1	48648.6	413304	17381.7	91922.2	183121	121936	119812	137864	154379	0.12048
MP97	3.867	71.0983		[M+CH3OH+H]+													214452	84730.5	56175.1	17183.1	34950.5	15289.3	12814.1	38988.7	52183	64872.4	67341.4	67157.3	0.114883
MP98	6.484	71.1058		[M+CH3OH+H]+													148879	311453	435852	31006.8	15513.7	105773	16608.8	34204.6	58936.6	112700	121784	103150	0.281039
MP99	6.87	71.1058		[M+H]+													186962	39359.6	21121.5	131127	13645.6	61724.8	13222.3	37978	51394	43678	45274.5	55598.6	0.112724
MP101	6.687	71.1059		[M+H]+													93359.7	171424	295492	180054	15625.9	95306.2	12372.2	93916.1	68628.9	59593.6	64990	70744.7	0.0739728
MP102	6.169	71.1304		[M+H]+													31434.6	28614.1	31876.1	26062	18949.3	31975.7	13420.8	24877.9	24772.2	20526.6	23894.5	24778.5	0.0860121
MP105	6.27	71.1617		[M+H]+													39515.5	24878.3	55352.2	25736	23413.5	16302.9	16248.2	25445.3	22292	24436	24652.4	22765.6	0.050255
MP106	6.98	71.1617		[M+H]+													39454	200530	109665	22965.9	44287.1	18702.2	12140.9	14035.8	20871.2	20854.1	22287.6	25901.5	0.105824
MP107	6.42	71.2166		[M+H]+													27400.5	34580.6	49807.8	22561.4	22281.9	35508.2	25382.9	45913.8	24557.4	24627.9	25555.7	26826.9	0.041716
MP115	7.04	71.3792		[M+H]+													18664.8	23587.2	27117.8	16142.7	12785.8	29076.4	49916.9	21662.6	20459.4	17500.7	18395.2	17073.5	0.0820283
MP116	5.1	71.3833		[M+NH4]+													15060.8	125706	161024	74002	55626.7	18462.9	46499.4	52343.2	30501.2	16869	30609.4	30554.2	0.252203
MP122	6.919	71.4915		[M+H]+													25810.8	21159.8	26945.2	24200.3	29556.3	17319.8	13467.4	13569.7	24418.2	24362.8	26287.3	19715.2	0.118183
MP123	5.174	71.4967		[M+H]+													1.11121e+06	1.7128e+06	1.92715e+06	1.1948e+06	7579.25	761073	20991.4	24409.4	846775	853738	786575	853210	0.038904
MP124	6.625	71.5525		[M+H]+													42596.6	77323.3	149616	22912.2	18195.2	37887.1	36785.8	18213.9	21278.8	21457.9	21416.2	26801	0.119156
MP125	7.161	71.5526		[M+H-H2O]+													98102	50996.7	178418	49363.3	14327.9	24445.5	49159.2	49159.1	15746.1	24615.6	15834.5	15958.8	0.24311
MP127	4.903	71.6073		[M+H]+													232126	924421	1.04071e+06	603925	18479.5	27600.4	22396.7	21853.5	339542	318707	349755	338655	0.0385786
MP128	6.088	71.6073		[M+H-H2O]+													135328	32329.1	21958.6	40047.9	15511.2	113994	105210	181124	129014	87942.8	138539	29511.1	0.515472
MP129	5.23	71.6081		[M+H]+													173568	395747	404455	220634	7010.37	8437.84	7745.61	119260	78606.8	79545.3	84957.9	108340	0.158606
MP130	7.279	71.6093		[M+ACN+H]+													40584.8	971051	1.02395e+06	236273	32826.5	10266.5	10450.2	19557.4	322501	314996	101812	77671	0.649316
MP131	6.497	71.6113		[M+H]+													350995	294103	333759	143984	18542.6	2.10519e+06	1.20871e+06	1.80117e+06	697489	697116	698120	675937	0.0156422
MP132	6.366	71.6113		[M+H]+													291552	250844	31499.9	264094	283697	1.20818e+06	795840	1.10362e+06	433608	369143	409481	435263	0.0748478
MP133	6.989	71.6649		[M+H]+													296554	642393	496147	81841.5	88492.6	23920.7	15474.7	53284	276554	192903	275064	268316	0.159409
MP135	4.891	71.7179		[M+H]+													679723	1.02526e+06	1.2126e+06	821484	63631.5	462158	24813.3	15955.5	465036	451618	438542	433529	0.0316123
MP137	6.211	71.7191		[M+H]+													82646	64648.2	110235	48769.6	100846	15597.4	44480.4	91556.6	28753.9	30541.3	32106.3	22588	0.14636
MP138	6.43	71.7228		[M+H]+													31601.1	45809	73425.8	157610	20552.3	504243	386541	566540	142949	120659	107030	123622	0.11982
MP147	5.215	71.8293		[M+H]+													23510.2	21933.2	56160.4	11979	8051.92	4434.75	216381	17581.9	18545.8	23482.2	18433.7	18072.5	0.131087
MP148	4.991	71.8312		[M+H]+													3.67206e+06	6.24914e+06	7.08907e+06	4.97411e+06	421817	113653	326255	276313	2.81162e+06	2.70284e+06	2.70669e+06	2.70245e+06	0.0197172
MP153	7.148	71.8847		[M+H]+													849597	1.26072e+06	1.46005e+06	461490	15785.2	15038.4	16832	24179.6	746494	753633	742352	466751	0.207362
MP154	7.419	71.9403		[M+ACN+H]+													196394	15789.9	417786	289663	7632.1	11387.9	22819.9	13885.9	30836.2	53619.1	24963.7	25475.6	0.401111
MP155	5.085	71.9427		[M+2H]2+													893627	1.62409e+06	1.72599e+06	1.16869e+06	9394.17	22143.5	17101.8	31647.5	708862	709081	694324	697558	0.010874
MP156	5.877	72.0442		[M+H]+													201912	105448	31104.7	83970.2	135200	129749	43252.1	292399	56717.7	53335.9	95848.4	75898.4	0.278664
MP157	0.653	72.0443		[M+H]+													518188	684642	667289	921629	1.16527e+06	599196	331205	85916	656347	670284	640097	691399	0.0327278
MP159	5.652	72.0454		[M+H]+													76836.5	134701	65385.8	90761.2	27540.5	293461	27132.8	20553.6	23842.8	44460.8	51339.3	50296.5	0.301079
MP160	0.916	72.0555		[M+H]+													107206	1728.83	302745	2379.26	58692.5	1946.25	61668.5	61746.8	7195.28	23067	9444.22	26584.5	0.58415
MP161	4.556	72.0732		[M+H]+													1.53056e+06	1.91926e+06	1.56877e+06	1.91247e+06	2.359e+06	1.76746e+06	1.75449e+06	2.056e+06	1.60741e+06	1.85253e+06	1.68871e+06	1.78559e+06	0.0621154
MP162	3.123	72.0806		[M+NH4]+													766992	587571	765735	515985	610318	687799	672836	548438	718516	738990	735647	648927	0.0591537
MP163	7.541	72.0806		[M+H]+													378034	473808	625287	397886	475328	846410	428236	482109	355451	378736	410851	417570	0.0740974
MP165	5.791	72.1223		[M+H]+													19708.6	23324.1	22408.9	34100.2	22315	34659.9	12290.8	19925.7	26778.8	24032.7	24446.3	19005.3	0.138838
MP167	7.187	72.1598		[M+H]+													232046	453339	502655	118776	15060.1	62295	114900	23095.1	146912	147789	102184	132172	0.161002
MP169	3.881	72.2117		[M+NH4]+													1.05405e+06	796239	542958	254614	253220	253759	206831	227018	427097	439826	427078	427049	0.0148182
MP170	7.321	72.2156		[M+ACN+H]+													38296.8	213216	78347.7	16719.1	56527.7	13734.2	34970.8	34408	34826.2	36451	21710.2	37226.2	0.224174
MP171	7.245	72.2156		[M+H]+													123003	198655	82301.2	28028.3	12026.9	12332.6	17669	17319.1	32986	37145.7	26901.9	27890	0.152408
MP172	5.93	72.2226		[M+CH3OH+H]2+													28961.6	25399.6	31148.6	26638.1	18596.9	24429.5	20006.3	23567.7	30772.4	24602.4	31952.5	29018.3	0.110817
MP174	3.878	72.2675		[M+CH3OH+H]+													952907	718649	498277	212792	198623	141422	111357	141944	358157	353395	347763	339338	0.0231331
MP176	0.582	72.3174		[M+H]+													1.66847e+06	1.66022e+06	1.61733e+06	2.18831e+06	2.28021e+06	2.311e+06	2.98091e+06	2.67656e+06	2.48817e+06	2.47604e+06	2.48808e+06	2.47605e+06	0.00280974
MP177	3.878	72.323		[M+H]+													271659	92641.1	87622.2	34349.1	5704.96	10620	7240.01	28841.8	54330.6	71584.2	77344.4	76574.9	0.153333
MP178	4.555	72.3239		[M+H]+													55793.5	105322	69080.1	238651	218112	157586	228998	240683	172940	181336	164758	163100	0.0491898
MP180	5.08	72.3818		[M+H]+													702843	1.21135e+06	1.19668e+06	700099	44482.5	67747.4	30105.9	40045.3	591029	591371	570412	572070	0.0198612
MP181	5.683	72.4436		[M+H]+													19308.7	29502.4	37436.1	130330	12947.6	34373.4	37998.7	162248	18021.4	16768.3	20307.9	19204.9	0.0820568
MP182	3.69	72.491		[M+H]+													223358	248688	231122	197270	203764	133718	75246.8	114197	181957	186337	181114	178723	0.0174658
MP183	5.275	72.4933		[M+H]+													82014.3	174134	22789	55909.8	60114.5	28749.1	6723.22	38171.4	57486.1	56978.4	56982.4	59086.1	0.0173077
MP184	6.222	72.4979		[M+H]+													341517	802293	676157	246221	32647.5	21951.8	199404	19690.4	176846	50186.3	152180	179059	0.435776
MP185	6.434	72.5536		[M+H]+													179711	409918	659758	107593	15725.6	25230	20676.8	14123.3	94390.2	99842.1	74922.3	125688	0.211987
MP186	4.494	72.5679		[M+NH4]+													6.40178e+06	1.01168e+07	3.97608e+06	7.25397e+06	6.94819e+06	1.64432e+06	24840.5	150998	4.87721e+06	5.12824e+06	4.87578e+06	4.93554e+06	0.0240862
MP187	5.741	72.596		[M+H]+													59062.8	83688.4	108573	105068	183652	58790.3	70988.8	577399	119497	125499	90994	125194	0.142544
MP189	6.276	72.6052		[M+H]+													252832	666031	350321	85518.2	25546.8	125554	21631.2	22808.4	136975	85901.1	102785	120745	0.198053
MP190	6.2	72.661		[M+H]+													174224	119505	88227.8	38683.7	37049.9	15227.3	13732.8	29101.7	22463.2	22354.2	22474.6	27161.5	0.100198
MP191	5.718	72.6636		[M+H]+													25248.1	45823.4	67366.7	23096.9	31246.7	20475.5	13152.3	26999.7	19675.4	19468.1	24053.8	19865.1	0.105854
MP196	6.882	72.7094		[M+H]+													23502.1	21365.4	24040.8	17849.8	20238.3	16074.6	22201.9	13010.4	18471.3	19705.7	19694.2	19033.4	0.030859
MP201	4.494	72.8187		[M+NH4]+													951267	2.3433e+06	530322	781724	1.02735e+06	108402	25745	591606	682377	679309	409089	682321	0.221974
MP205	6.366	72.8556		[M+H]+													22904.2	28857.3	33070.2	23796.8	24661	24526.4	24553.4	28297.7	22115.4	22759.9	22682.3	22286.1	0.0138037
MP206	6.533	72.8604		[M+H]+													20779.8	30310.5	32783.9	25241.1	24102.2	27180.2	23140	20749	20984.1	21490.1	20394.5	19800.6	0.0353685
MP208	6.266	72.9101		[M+H]+													25822	31349	18981.1	28151.6	14841.3	36238.1	24133.9	38137.5	27094.6	28379	27140.5	29823	0.0458258
MP209	0.104	72.9374		[M+H]+													27346	11640.7	12576.4	28537.3	10926.3	18271.2	28188.6	18252.1	24684.6	29722.7	28119.8	10215.1	0.383805
MP210	7.775	72.9374		[M+H]+													73536.5	40884.3	18310.7	82132.9	23496.2	21704.1	38484.6	47654.5	31564.2	35004.9	29426.6	29555.2	0.0829154
MP211	7.709	72.9375		[M+H]+													30738.5	22370.7	24321.5	13618.6	38595.9	52412.1	37981.5	17711	23644.9	23648.2	21364.7	22137.8	0.0501727
MP212	7.852	72.9375		[M+H]+													116608	23947.8	28372.6	24799.4	86452.4	69018	43883.1	76177.5	56263.8	62716.5	56725.6	59852.2	0.0510842
MP213	7.94	72.9375		[M+H]+													42359.6	90508.9	131481	81047.3	97043.3	71524.7	35217.8	151032	54434.3	60873.8	55966.1	64994.3	0.0814714
MP214	0.026	72.9438		[M+H]+													146293	109406	156173	47704.3	124419	147323	259422	232596	89300.1	89305.6	74972	85691.6	0.0799448
MP217	0.515	73.0277		[M+H]+													283083	342520	197814	176601	190058	210749	83731.8	57370.2	173253	153064	156352	180029	0.0786537
MP219	5.509	73.054		[M+H]+													866149	1.31755e+06	1.53109e+06	943372	17748.5	36680.2	272325	183332	666832	676806	666981	694213	0.0190455
MP220	4.969	73.0646		[M+H]+													634854	663692	745011	726549	610423	599572	738525	819885	667751	680993	622770	673316	0.0396148
MP222	3.493	73.0647		[M+H]+													237818	337111	292919	410798	328471	419405	243563	365022	335505	355227	347869	335457	0.0283846
MP223	5.579	73.0647		[M+H]+													1.66339e+06	1.50449e+06	1.55787e+06	1.82148e+06	1.69847e+06	1.56814e+06	1.91274e+06	2.01804e+06	1.56775e+06	1.56824e+06	1.59942e+06	1.62054e+06	0.0161918
MP224	1.008	73.0647		[M+H]+													177524	254942	431176	245128	225790	141151	315017	155914	206417	232025	154284	235542	0.181131
MP225	3.922	73.0701		[M+H]+													44094.3	20153.7	45488.8	57120.8	41187.9	9538.63	101145	186016	32423	28458.2	28168.6	41399.3	0.189228
MP226	0.629	73.0759		[M+H]+													579579	556699	542189	688355	520861	466573	385688	509235	493534	328818	492802	467694	0.176907
MP227	7.169	73.0885		[M+H]+													142050	189977	193211	29917	32021.8	21886.1	35768.3	15082.1	122344	124907	93013.9	112731	0.127794
MP231	3.881	73.1576		[M+H]+													4.65142e+06	3.44654e+06	2.83266e+06	1.1446e+06	1.24287e+06	1.13828e+06	780464	1.03106e+06	2.04069e+06	2.04469e+06	2.04443e+06	1.98924e+06	0.0133391
MP232	5.597	73.1645		[M+H]+													48608.1	23713.3	110697	18180.8	40207.5	3677.38	4094.35	16793.6	24180.6	20605.7	20076.8	31741.6	0.222704
MP233	5.256	73.1646		[M+H]+													563571	1.81187e+06	2.12993e+06	1.2923e+06	79030.7	75181.5	19122.1	35810.1	733527	692619	702198	692706	0.0274676
MP234	6.741	73.1686		[M+H]+													365468	52473.9	24589	310085	408576	975880	664356	821960	685793	685904	684952	535641	0.115659
MP235	5.352	73.1686		[M+H]+													138822	162164	22209.7	1.33101e+06	81398	7411.51	65010.2	48018.5	713766	592713	714690	715216	0.0890589
MP236	6.553	73.1687		[M+NH4]+													35184.2	469225	180473	152111	130101	735215	458321	559117	159799	123067	225393	224491	0.275639
MP237	3.881	73.2134		[2M+H]2+													2.90126e+06	2.17211e+06	1.7534e+06	723155	696085	681858	475046	630725	1.26263e+06	1.28541e+06	1.2496e+06	1.24909e+06	0.0134849
MP238	3.881	73.2691		[M+Na]2+													869405	628827	531189	202781	274059	262405	123922	199229	416971	402362	395143	395048	0.0256281
MP239	5.451	73.2752		[M+H]+													674773	1.08371e+06	1.23005e+06	869205	19322.6	497060	13417.5	22459.2	540929	541225	514979	541200	0.0244489
MP240	7.512	73.2765		[2M+H]+													43890	24914.7	48405.3	19617.6	57484.3	20576.9	37394.1	12943.2	51597.9	40065.6	13908.3	66475.5	0.516388
MP241	6.247	73.2766		[M+Na]+													1.12826e+06	1.4106e+06	1.32459e+06	212589	25472	198635	117904	169016	338381	241795	235321	297666	0.175605
MP243	6.409	73.3838		[M+H]+													833925	159142	1.04817e+06	157409	16562.3	43134.5	238104	11151.7	85435.6	97154.1	86172.8	116281	0.149412
MP244	5.991	73.3864		[M+H]+													90417.9	73983.8	82836.8	47317.3	159015	17797.9	73860.2	93345.8	88569.4	89955.5	25313.9	92153.5	0.43906
MP245	5.223	73.3885		[M+H]+													7.14982e+06	1.13925e+07	1.24075e+07	8.46745e+06	785293	367714	784726	668374	5.42194e+06	5.24778e+06	5.29224e+06	5.18689e+06	0.018849
MP248	3.882	73.433		[M+H]+													821680	621275	423275	193131	222750	171014	151920	182793	399417	387879	402364	402372	0.0173222
MP249	6.313	73.4397		[M+NH4]+													56301.8	482432	35198.2	42992.8	52666.7	14495.1	19311.5	18210.1	65002	57921	50374.7	64178.5	0.11418
MP250	6.595	73.4397		[M+Na]+													145261	82053.7	263584	36933.4	13190.8	14858.3	42608.2	13791	41769.1	28965.6	35469.5	45637.9	0.19272
MP255	5.226	73.5		[M+H]+													1.86126e+06	3.08841e+06	3.40447e+06	2.30013e+06	101200	23479.5	146433	100267	1.41275e+06	1.39721e+06	1.45081e+06	1.31295e+06	0.0417595
MP256	3.346	73.5316		[M+H]2+													2.00759e+08	71092.2	8.61355e+07	80176.4	2.9982e+07	8.9178e+07	1.15049e+08	2.6108e+08	1.12196e+08	8.60601e+07	8.59927e+07	1.05456e+08	0.138032
MP257	0.509	73.5316		[M+NH4]2+													4.53621e+08	4.56371e+08	2.8103e+08	2.69643e+08	3.38848e+08	2.68246e+08	8.86741e+07	1.80335e+08	2.90825e+08	2.8517e+08	2.83178e+08	2.86295e+08	0.0113121
MP258	7.424	73.5316		[M+2H]2+													6.09623e+06	6.02775e+06	5.96629e+06	6.11408e+06	5.98283e+06	5.84608e+06	5.70076e+06	5.94244e+06	5.88525e+06	6.06708e+06	5.79722e+06	5.95476e+06	0.0192344
MP259	3.69	73.5316		[M+H]+													49823.9	36278	4.56322e+06	6888.92	1.17809e+06	3.95333e+06	6.59853e+06	1.01722e+07	3.75853e+06	47553.4	2.74611e+06	4.10643e+06	0.689647
MP260	0.81	73.5317		[M+H]+													3.29604e+06	7.10225e+06	5.09876e+06	4.38206e+06	3.72496e+06	3.35347e+06	1.24595e+06	3.35123e+06	3.05866e+06	3.2977e+06	3.02025e+06	3.50355e+06	0.0699888
MP261	6.537	73.5518		[M+H]+													74723.6	98922	292705	111060	82575.9	13207.5	80532.1	80534.4	37909.5	32632.4	33169.2	43679.1	0.13935
MP267	4.547	73.6083		[M+H-H2O]+													52309.4	233401	284187	159127	18948.8	74499.5	73989.3	13139.3	39967.2	42343.1	42375.8	27106.4	0.19277
MP268	5.224	73.6114		[M+H]+													209162	370681	525685	256605	11800.3	9692.35	6317.83	128653	61078.1	61588.3	48557.9	61600.5	0.110587
MP275	5.549	73.7151		[M+ACN+H]+													150177	506009	501453	305290	20802.5	33299.7	34841.1	194144	227872	220377	220354	220425	0.0168429
MP279	3.764	73.823		[M+H]+													126756	107535	41883	42430.8	11821.3	9633.71	25066.4	10546.7	20660.4	19178.8	27466.7	23121.2	0.160353
MP284	6.939	73.8714		[M+H]+													16510.4	24143.6	19567.1	19910.8	21848.9	15953.6	20782.5	24031.3	18115.8	20938.6	21736.1	18569.5	0.0891688
MP285	0.434	73.8919		[M+H]+													25560.6	10066.2	13684	17042.7	15891.4	4853.07	7435.7	28591.1	7831.53	10124.5	9707.85	7788.34	0.138554
MP287	5.232	73.9392		[M+H]+													1.85654e+06	2.38563e+06	2.33934e+06	1.59407e+06	172349	70313.3	214533	181595	1.3583e+06	1.35841e+06	1.35503e+06	1.32607e+06	0.0116119
MP294	6.78	73.9985		[M+NH4]+													20067.6	47004.2	98212.9	25334.3	32382.9	12823.8	31218.6	31218.6	24246.2	23459.4	24098.9	20658.1	0.0724005
MP296	3.09	74.0241		[M+H]+													897323	198671	293312	58871.4	132145	1.15581e+06	708623	1.83079e+06	356246	358198	361969	484360	0.161004
MP297	3.415	74.0321		[M+2H]2+													3.66557e+06	12615.6	4.1393e+06	2111.31	1.66325e+06	601820	1.91994e+07	3.02662e+06	1.69278e+06	894052	815304	1.0977e+06	0.352732
MP298	5.238	74.0506		[M+H]+													1.5059e+06	1.70621e+06	1.5847e+06	1.50947e+06	977623	1.54307e+06	1.62816e+06	951980	1.30814e+06	1.41188e+06	1.65748e+06	2.07277e+06	0.21083
MP299	6.623	74.0531		[M+H]+													646128	43711.3	2.9031e+06	39867.6	3.67357e+06	1.67868e+06	1.80328e+06	2.06819e+06	1.81881e+06	1.95872e+06	1.95713e+06	1.23532e+06	0.197659
MP300	3.399	74.0599		[M+H]+													574307	1.72376e+06	883805	1.6084e+06	1.22716e+06	741923	832901	1.28908e+06	1.29498e+06	1.37537e+06	1.2114e+06	1.21697e+06	0.060574
MP302	1.116	74.0599		[M+H]+													2.41945e+06	2.40601e+06	2.50463e+06	2.36601e+06	2.36642e+06	3.09095e+06	2.54643e+06	2.27203e+06	2.32907e+06	2.45477e+06	2.44342e+06	2.34051e+06	0.0277262
MP304	3.074	74.0962		[M+H]+													833232	772066	590607	1.09399e+06	714162	736995	342884	887756	761006	764854	705603	671450	0.0622696
MP305	4.545	74.0962		[M+H-H2O]+													915218	1.04331e+06	1.36171e+06	1.47553e+06	844963	905446	1.06292e+06	896783	974956	1.00676e+06	779131	1.01345e+06	0.117539
MP310	6.486	74.1625		[M+H]+													488096	339633	680909	71854.3	23265.1	199229	200586	14992.7	124101	117065	90264	117980	0.133982
MP311	5.815	74.1652		[M+H]+													19554.4	25950.9	26502.8	19376.4	25250.5	33740	8079.31	33461.8	23509.5	24259.2	23697.5	26905.1	0.0640042
MP312	6.63	74.1667		[M+H]+													112303	190376	90239.7	49213.3	79917	61423.3	59122.3	21416.9	59543.2	50656.1	52644.4	59046.4	0.0809803
MP313	7.316	74.1667		[M+2H]2+													52478.8	16705.2	139632	16342.9	35158.8	23040.3	34862.1	14179	15691.4	15372.4	20514.9	15545.4	0.14854
MP314	4.695	74.2178		[M+H]+													26467.9	31960.2	30444.7	34568.5	10889.3	20710.2	13936.8	7021.07	27030.8	25682.3	29124.7	31816.6	0.0941261
MP315	6.606	74.2183		[M+H]+													103781	269876	351795	52524.6	17478.6	69964.9	18035.3	69218.2	22545.1	23462.1	21547	21621	0.0404388
MP316	6.237	74.2183		[M+H]+													47367.2	26829	23833	16819.8	17674.6	29709.5	19605.9	16363.4	27390.8	27248.2	25047	24960.3	0.0511737
MP318	6.419	74.2184		[M+H]+													130295	233479	27603.3	72106.8	12657	41642.3	16557.5	18795.4	38061.2	38037	34228.3	29984.1	0.109581
MP322	5.235	74.2761		[M+H]+													29399.4	30814.8	21408.6	20069.8	20323.3	25103.3	15533.4	37904.8	19631.4	22628.6	20268.9	21236.1	0.0622733
MP324	6.707	74.372		[M+ACN+H]+													29835.6	32721.7	34662.8	19622	17327.5	23569.6	12085.6	34460	19535.9	23496.5	23394.6	22483	0.0832912
MP325	5.372	74.3974		[M+ACN+H]+													17413.5	19351.4	18632.9	18218.2	16325.3	13296.8	10752	19757.7	12025.3	17273.4	18429.9	19062.7	0.191756
MP332	4.515	74.5304		[M+H-H2O]+													15508.2	16769	1.52968e+06	194080	127723	106110	36210.6	21515.5	25046.8	25251.8	26796.7	31442.8	0.109693
MP336	5.699	74.59		[M+H]+													20503.4	39954.5	24221.1	17620.2	18930	28662.7	55691.7	24843.7	18095.1	19756.7	17179.9	16432.7	0.0801546
MP337	6.726	74.6236		[M+H]+													26544.2	33041.1	24561.9	23843.6	16242.7	18351.6	15188	22089.2	27218.4	30437.8	31946.9	16843	0.255693
MP338	3.894	74.6576		[M+NH4]+													703954	601876	425580	171217	207527	199504	112149	136785	308297	309832	304756	297381	0.0181831
MP341	3.891	74.7134		[M+NH4]+													741539	434058	302176	97528.3	149404	126159	82506.7	66264.4	260158	260156	260058	233711	0.0520924
MP342	5.695	74.7219		[M+H]+													558942	1.73468e+06	1.98266e+06	1.12354e+06	14081.6	7070.4	20141	19739	714555	625107	625001	639154	0.0659317
MP343	7.22	74.7259		[M+H]+													36970.1	18898.9	20236.5	39068.3	28019.7	245200	46313.6	246738	49213.8	58186.9	45325.1	45137.4	0.123523
MP348	3.764	74.769		[M+NH4]+													96477.2	72870.1	29293.5	13627.1	10053.9	20887.2	17504.7	31526.2	28357.6	36665	42239.8	41621.1	0.172323
MP349	6.007	74.7914		[M+H]+													25023.2	22796.7	30686.2	21939.4	22918.8	17906.3	24052.6	11351.8	22199.4	19089.3	22276.3	21745.5	0.0708223
MP352	4.996	74.8311		[M+H]+													45422.8	226430	300913	138713	39166.5	15448.7	10828.1	35818.6	49693.9	66292	50135.2	50141.7	0.150808
MP355	5.194	74.8778		[M+H]+													29557.7	27982.2	24393.7	28534.6	21606.9	10945.5	21637.4	26285.4	20568	24602.6	24963.3	20583.6	0.107299
MP356	6.172	74.8875		[M+H]+													23788	39989	34483.2	16080.8	286908	52989.5	36467.1	33426.4	29559.9	25058.3	25125.3	24997.8	0.0859381
MP359	6.652	74.9412		[M+H]+													17587.5	37803.9	42836.7	19109.1	24086.2	24609.7	14284.9	19501.4	22972.6	20298.9	22509.2	20366.8	0.065163
MP361	6.075	74.9438		[M+H]+													141748	200225	209820	57985.1	33754.7	11633.9	26660.3	30998.6	37745.7	37326.5	39755.4	39811.6	0.0338595
MP363	5.484	74.9459		[M+H]+													5.59153e+06	8.84022e+06	9.48644e+06	6.66847e+06	679391	612418	1.30756e+06	1.1063e+06	4.5748e+06	4.44753e+06	4.44602e+06	4.46157e+06	0.0138184
MP368	3.203	75.0504		[M+NH4]+													184735	444145	490112	153224	156547	183493	281561	457638	181632	185837	200615	222326	0.0930304
MP369	5.933	75.0537		[M+H]+													33803.9	37002.1	90053.2	30485.3	400990	152400	128206	49780.1	57675.2	56739.9	57126.1	80105.6	0.182304
MP370	0.278	75.0552		[M+H]+													258634	271416	424013	230000	245768	324796	399410	158784	275707	262384	254288	291986	0.0608396
MP371	5.391	75.0574		[M+H]+													1.85266e+06	2.73534e+06	2.94868e+06	2.08546e+06	101441	225084	190368	233510	1.52128e+06	1.5218e+06	1.63944e+06	1.541e+06	0.0362855
MP372	6.999	75.1094		[M+NH4]+													241996	190640	45712.8	81290.7	22638.8	285585	301839	255031	330607	332785	349431	377425	0.0621796
MP373	4.75	75.1658		[M+H]+													399135	1.44843e+06	926002	914767	8609	545540	545549	545837	542638	542351	542730	522836	0.018358
MP374	5.664	75.1688		[M+H]+													127365	272631	322842	172358	109691	9691.98	21340.7	28963.3	49324	32225.8	41435.5	34537.9	0.195454
MP375	7.303	75.1713		[M+Na]+													16551.1	17744.3	18392.4	21143.3	19884.2	12991.8	13147	18549.3	20278.2	18116.2	18939.4	18166.3	0.0534284
MP384	4.722	75.2712		[M+H]+													187548	428642	429589	214670	24854.9	138293	40577.5	137978	81082.5	97104.5	81405.5	86200.7	0.0865221
MP385	5.638	75.2725		[M+H]+													77323.3	492441	385937	263864	18384.5	9085.19	6655.4	136145	148481	154444	153090	138563	0.0483679
MP389	5.875	75.3048		[M+H]+													83256.5	35387.3	43393.8	20843.7	37789.4	37250.7	37248.6	31599.3	23454	30753.1	29143.3	30766.6	0.121569
MP393	5.056	75.322		[M+H]+													160057	142205	49869.1	129034	54536.2	19649.9	620637	22054.1	126623	66498.1	55210.2	67426.9	0.4088
MP396	4.902	75.3805		[M+H]+													208962	449329	331073	146803	24473.5	18487.5	22883.1	37798	96103.1	94864.8	117522	94823	0.110534
MP397	6.182	75.3875		[M+CH3OH+H]+													619395	1.15572e+06	928077	228035	69838.1	99057.3	85650.6	127420	379198	379186	374269	368578	0.0134586
MP398	5.493	75.4965		[M+CH3OH+H]+													1.79036e+06	2.15208e+06	2.42956e+06	1.51272e+06	255413	282584	553922	296290	1.31253e+06	1.33364e+06	1.26321e+06	1.33195e+06	0.0250659
MP400	3.76	75.5022		[M+H]+													415234	929315	3.83934e+06	437196	319176	840286	36206.9	329139	710597	722785	726566	678293	0.0309067
MP401	7.598	75.504		[M+Na]+													25131	20564.6	29860.9	28719.7	14114.2	19492.5	30708.9	35555.5	32805.1	28026.8	29902.1	31716.7	0.0685657
MP407	3.894	75.6035		[M+H]+													3.26892e+06	2.7712e+06	2.07048e+06	807870	921727	813091	611540	723191	1.47676e+06	1.52002e+06	1.47397e+06	1.47342e+06	0.0152764
MP408	5.494	75.608		[M+CH3OH+H]+													248254	610859	566700	398825	9263.05	43279.3	69032.5	71443.7	354491	347365	334159	354809	0.0277906
MP409	7.003	75.6098		[M+H]+													27810.1	69055.2	62030.9	18900.2	17902.5	63402	40063.7	27891.1	74430.3	79442.4	44316.9	71611.2	0.233632
MP410	6.764	75.6098		[M+H]+													30202.8	23343.8	23926.4	18153.8	117483	15350.9	31028.7	47984.9	25370.1	32336	33835	28161.8	0.129358
MP411	6.897	75.6103		[M+H]+													17013.5	23008.9	25177.8	35044.5	153160	55283.2	48775.3	165804	15317.1	15244.2	22484.1	15304.6	0.210555
MP413	6.468	75.6125		[M+H]+													55351.3	152028	164175	719358	94835.2	17505.1	25541.7	41193.4	125234	124132	125002	36898.8	0.427439
MP414	6.612	75.6125		[M+H]+													46113.9	38043.6	20111.9	118083	28257.3	58346.8	34581.7	74805.2	28660.4	36765.4	36754.8	29649.4	0.13379
MP417	0.545	75.6528		[M+H]+													71806.6	53336.3	130693	160547	133389	329790	35217.6	239801	158297	142130	119808	153005	0.118988
MP418	3.893	75.6593		[M+2H]2+													2.08647e+06	1.77732e+06	1.22582e+06	491983	537396	555550	333696	438175	927991	927345	920019	919983	0.00480017
MP420	3.894	75.715		[M+NH4]2+													650514	544590	367103	117600	181669	149484	119926	131452	319876	339454	316770	316821	0.0337625
MP421	5.118	75.7162		[M+H-H2O]+													51529.3	45064.8	182210	13899.2	6089.81	38178	19631.7	21989.8	34631.7	33625.5	19725.3	30779.3	0.230404
MP422	6.311	75.7224		[M+2H]2+													684975	411063	36415.8	357670	34349.7	21559	27632.2	18153.5	195103	211999	167979	91102	0.321019
MP423	7.068	75.7224		[M+H]+													36041.9	956397	32864.3	11202.7	20942.6	23161	38345.5	30436.6	35221.8	35946.4	49319	35920.4	0.174408
MP426	6.23	75.7782		[M+Na]+													255154	22827.7	86806.9	123934	19355.7	82043.1	34143.5	20719.4	76532.8	76416	44617.3	76942.1	0.233262
MP427	6.517	75.7783		[M+H]+													29323.5	37148	222882	78923.3	20280.4	49643.1	15093.6	21095.2	37462.1	49380.2	43179.2	38172.6	0.131047
MP429	6.242	75.8298		[M+H]+													317667	233099	349233	42100.9	41351.1	115920	143575	49614	131363	109409	107085	117029	0.0942286
MP430	5.945	75.8298		[M+H]+													32912.2	37104.4	53995.1	23574.8	18078.8	50426.4	25317.4	33855.3	45810.8	52407.7	33518.1	37737.9	0.1986
MP432	0.589	75.8673		[M+H]+													1.34062e+06	1.21915e+06	1.52877e+06	856933	723647	4213.21	169957	632089	416616	467476	430289	415878	0.0559435
MP433	3.894	75.8789		[M+NH4]+													616944	484037	307445	96209.1	158950	152629	87040.3	131625	295258	297369	299572	299575	0.00694765
MP435	6.181	75.8856		[M+H]+													116748	471268	66330.7	35724.7	16909.2	29092.1	27750	29554.3	24682.6	24094.8	23022.7	24746.8	0.0330839
MP436	5.994	75.8896		[M+CH3OH+H]+													29631.7	29190.5	37765.5	39066	57977.5	18485.8	11021.4	17308.5	26318.4	25814.2	25827.8	26321.3	0.0110489
MP439	3.893	75.9345		[M+Na]+													364303	305803	150373	18180.1	91740.4	68779.7	49432.1	58767.1	161315	145290	145322	146999	0.0518494
MP447	4.541	76.0391		[M+Na]+													534397	1.60087e+06	2.06566e+06	919327	1.25695e+06	1.49685e+06	1.42899e+06	1.45416e+06	1.36863e+06	1.17255e+06	1.4431e+06	1.4619e+06	0.0971542
MP448	5.561	76.0391		[M+H]+													304046	344865	717254	509926	509807	291558	1.14778e+06	1.30743e+06	596782	491175	655498	660898	0.131127
MP450	7.33	76.0391		[M+H]+													352575	185858	92869.4	271233	594440	173494	146298	948971	301684	66602.5	353834	345308	0.507548
MP451	7.521	76.0392		[M+H]+													891123	622561	607106	1.21822e+06	1.09059e+06	1.29628e+06	1.43555e+06	951139	567666	557999	721439	656573	0.123994
MP452	0.5	76.0392		[M+H]+													4.59115e+06	2.04377e+06	7.28701e+06	6.44771e+06	7.86212e+06	2.67354e+06	3.39145e+06	7.80317e+06	3.59803e+06	3.88958e+06	3.62092e+06	4.34658e+06	0.0900742
MP454	6.692	76.0755		[M+H]+													141017	22244.5	84550.7	62668.2	77328.5	130291	197451	93453.1	57081.9	116421	104642	61536.1	0.353469
MP459	6.042	76.2457		[M+H]+													20084.6	35188.7	47032.9	29359.8	22182.6	17585.1	12103.6	24063.5	30625.7	28228.8	27062.3	26837.9	0.0615622
MP465	6.767	76.3244		[M+H]+													19298.5	21741.1	18854.4	21630	18022.3	15809.7	21041.4	19968.9	20283.3	17898.9	20198.6	19985.1	0.057951
MP468	3.732	76.3793		[M+H]+													25281.2	18296.4	8646.67	20360.5	20088.2	24443.8	5483.39	5799.97	8492.92	18718.9	13534.6	8588.68	0.394404
MP469	5.159	76.3885		[M+H]+													196277	758011	865075	468273	6438.94	283612	11986	6167.65	295118	329087	328979	329062	0.0529139
MP470	6.553	76.389		[M+H]+													20089.6	90836.5	31952.4	49006.1	34320.4	12850.9	27633.3	26573.7	29034.1	30488.7	24423.4	30624.3	0.101368
MP475	6.777	76.4447		[M+H]+													26824.6	43716.5	25937.2	26283.8	17502.9	19547.3	26378.5	32194.1	26100.5	26101	28144.8	27278.2	0.0369797
MP477	7.08	76.4493		[M+H]+													25680.6	34127.6	26553.5	21958.3	20386.6	23264.1	36656.4	28937.3	28450.4	25006.2	28759.4	24868.8	0.0792591
MP479	5.175	76.499		[M+H]+													13373.3	126562	266983	105805	12396.3	25732.2	56052.8	49756.1	26913.6	17755.1	18719.2	17629.9	0.220496
MP480	6.872	76.5011		[M+2H]2+													472345	557180	1.70207e+06	276724	31855.3	443278	27504.4	20342.4	256957	258460	229650	81689.1	0.40824
MP481	6.51	76.5032		[M+H]+													201313	197495	665717	51687.2	15427.3	1.09584e+06	648181	867074	386031	404541	393548	365838	0.0420995
MP482	6.307	76.5032		[M+H]+													59064.6	39927.1	28101.2	54284.2	41457.7	480739	424652	575549	135709	125595	112874	106672	0.108069
MP483	6.075	76.5037		[M+H]+													13098.4	19006.3	26585.9	15572.1	92645.8	5196.99	10788.7	43131.9	31121	23706.5	24568.1	21299.7	0.166804
MP486	4.998	76.6096		[M+H]+													141299	232796	306485	209367	7419.47	9169.96	21485	8733.1	43190.5	25414.5	25735.9	32321.7	0.262634
MP487	6.454	76.6146		[M+H]+													433272	605172	632551	79429.1	88020.8	373038	160960	258636	92297.4	94345.9	92326.5	121338	0.141955
MP488	6.635	76.6643		[M+ACN+H]+													279025	363700	87492.6	58450.4	17332.7	22687.5	11889.7	21182	40792.3	33687.2	26745.4	27979.3	0.198688
MP490	6.101	76.7045		[M+H]+													36354.2	34413.4	35678.9	24638.2	18815	15616.2	24149.6	44382.7	25832.7	29152.1	27517.8	26284	0.0546206
MP493	4.962	76.7231		[M+H]+													1.63177e+06	2.89558e+06	3.11421e+06	2.08438e+06	86225.7	1.18897e+06	193054	65193.3	1.2179e+06	1.18573e+06	1.17334e+06	1.12545e+06	0.0326198
MP495	6.519	76.7764		[M+H-H2O]+													20517.3	159645	150208	19313.6	15143.4	35188.8	18861.8	27854.5	22559.5	23164.6	22516.7	28760.1	0.124581
MP496	6.905	76.7765		[M+H]+													97505.3	238138	257307	23828.1	91805.1	13738.2	68676.1	70209.8	44337.5	43350.1	42371.6	38960.8	0.0553354
MP500	4.901	76.8286		[M+NH4]+													218602	479374	532476	415833	150370	19145.7	220860	17464.3	221591	221569	221591	193768	0.0647983
MP502	6.069	76.8535		[M+H]+													20765.4	19122	26728.7	33349.2	36451.1	22689.5	34742.6	26297.5	22310.8	23625.9	22990.2	22349.9	0.027236
MP503	5.397	76.9379		[M+H]+													329297	723407	600136	362580	20423.7	25253.4	18369.4	56113.1	260769	274152	261020	265817	0.0235679
MP504	5.182	76.9427		[M+NH4]+													137786	62675.4	91630	65101.8	181720	188130	45320.4	104165	91380	150853	134895	98784.7	0.239639
MP506	0.575	76.9819		[M+Na]+													39787.9	25377.2	129516	3662.4	155083	184065	234452	66488.4	182491	215661	180856	182568	0.08857
MP507	0.028	77.0011		[M+NH4]2+													364992	527030	111361	300923	282947	400617	384784	813241	361766	453215	369308	372489	0.110271
MP508	3.097	77.0377		[M+Na]+													1.62443e+06	1.72187e+06	1.69186e+06	1.55837e+06	1.91693e+06	1.73936e+06	1.28624e+06	1.81499e+06	1.48936e+06	1.47977e+06	1.43306e+06	1.4897e+06	0.0183339
MP509	3.905	77.1036		[M+H]+													549635	434877	194507	63398.9	91846.9	132815	65812.1	91411.8	210805	215006	215032	194972	0.0456098
MP512	3.957	77.1593		[M+NH4]+													449901	358235	149767	117128	71967.8	74221.8	43288.8	38463.8	165294	140540	139935	138757	0.0875674
MP513	4.176	77.2153		[M+H]+													85804	52979.4	32699.3	11232.2	12669.6	11744.7	22131.8	28117.6	28076.2	23202.7	30370.4	30070.5	0.11858
MP516	4.761	77.2736		[M+H]+													207348	381235	200647	194311	21226.6	11851.7	13994	11397.3	182650	181612	161224	148338	0.0988351
MP518	7.54	77.2797		[M+H]+													116686	29306.5	132331	27061.1	21486	20537.7	15940.5	19580.3	18824.2	27392.9	23548.9	26416.3	0.159873
MP520	4.074	77.3075		[M+NH4]+													168172	215797	275199	238683	6112.21	32309.3	19451.7	4058.08	123939	111921	108552	108373	0.0648911
MP523	3.828	77.3829		[M+H]+													82733	125853	97801.5	76430	72436.9	53156.4	21342.3	24807.2	66262.3	67542.9	67659.6	66237.9	0.0116789
MP524	7.027	77.3871		[M+H]+													164209	79356.3	196926	20218	12879.1	12897	16137.2	53557.1	29911.7	26458.5	25927	33381.7	0.11963
MP525	6.456	77.3872		[M+H]+													155478	28818.6	198860	32355.6	14947.4	17337.3	16492.1	24479.8	28203.9	22080.9	22150.1	21918.6	0.130513
MP526	0.549	77.4279		[M+H]+													67452.8	39744.2	101421	82674.8	38374.3	47542	38170.1	6360.96	30079.6	12266.2	26977.7	31633.7	0.351145
MP528	6.965	77.443		[M+CH3OH+H]+													53168.1	33207	90582.8	22598.9	21011.7	37008.2	37012.8	16307.2	34853.4	33442.6	34838.7	27243	0.111321
MP529	5.29	77.4885		[M+H]+													150702	130083	86467	19024	86279.4	54818.2	6735.98	33844.3	19016.9	19156.4	19002.8	24902.1	0.142426
MP530	0.128	77.5002		[M+H]+													10321.1	15740.5	78084.9	74574.7	21736.8	7282.16	169654	22246.5	68156.5	35535.5	58466.8	67191.6	0.264645
MP532	7.389	77.555		[M+H]+													247200	230108	433195	52516.1	15223.8	103497	11915.8	19993.8	34572.2	66719.2	72893.4	70575.1	0.292973
MP533	7.234	77.5551		[M+H]+													444062	135656	266904	198247	11769.5	134011	10076.6	134011	81254.1	68170.7	58800.5	58919.7	0.158671
MP536	7.184	77.6108		[M+H]+													151469	133365	426855	60080.4	90796.9	16298.4	9172.62	18604.7	38985	36898.1	28634.5	33878.1	0.12992
MP539	6.333	77.6728		[M+Na]+													26058	24822.8	22782.3	26108.3	26385.5	25787.9	20203.5	13038.1	22055.2	20798.3	16570.4	18581.3	0.124349
MP542	6.562	77.7216		[M+NH4]+													20665.1	23569.3	22214.3	34384.2	18683.9	31889.6	21395.2	20934.9	22825.8	21178.5	21331.5	21862.8	0.0341416
MP547	7.269	77.8303		[M+H]+													47827.8	31292.8	79714.4	55335.5	42964.9	16757.5	9283.63	34965.2	28305.2	26309.8	24123.7	23503.5	0.0856866
MP549	0.463	77.8694		[M+H]+													192459	113517	105456	86995.4	90001.2	56480.8	203869	38405.5	89290.2	97080.7	22695.2	93146.7	0.468305
MP551	7.341	77.8861		[M+H]+													34828.5	75426.2	27274.5	7482.18	21523.5	16171.2	16089.7	9702.94	21570.8	19979.8	17042.8	18443.8	0.101394
MP553	3.759	77.9446		[M+H]+													524017	1.17227e+06	3.81157e+06	670871	410438	976251	45023.4	374955	943688	987218	1.02421e+06	931924	0.043519
MP554	5.441	77.9459		[2M+H]+													939541	1.3732e+06	1.48487e+06	900954	677801	13927.7	9233.46	50396.8	520748	552673	364348	551488	0.180706
MP555	0.324	77.9985		[M+H]+													1.28607e+06	1.08379e+06	1.18146e+06	1.09156e+06	1.31032e+06	1.15922e+06	32895.9	909884	1.19194e+06	1.12288e+06	969557	1.12741e+06	0.085549
MP556	7.766	77.9986		[2M+H]2+													3.92049e+06	6.68477e+06	2.26343e+06	5.02896e+06	4.88864e+06	6.61539e+06	3.77535e+06	4.87047e+06	4.48815e+06	5.33092e+06	4.26676e+06	4.24509e+06	0.111449
MP557	3.802	77.9986		[M+H]+													112690	144192	168061	239071	158629	142010	338768	83841.9	122207	201738	210231	199434	0.22388
MP558	0.022	77.9986		[M+H]2+													1.52414e+07	1.53344e+07	1.53392e+07	1.40747e+07	1.23213e+07	1.49872e+07	1.46247e+07	1.3486e+07	1.53431e+07	1.53518e+07	1.5356e+07	1.45942e+07	0.0249383
MP559	6.378	77.9986		[M+CH3OH+H]+													27753.1	440548	25735.8	18279.5	20754	10576.4	11604.2	15253.4	39878.1	29352.7	28714.1	28970.1	0.171429
MP561	3.905	78.0495		[M+H]+													2.3481e+06	1.96829e+06	1.51876e+06	629289	635395	611071	378798	457802	1.0609e+06	1.06447e+06	1.0648e+06	1.03208e+06	0.0149226
MP562	3.823	78.0561		[M+H-H2O]+													180650	426918	1.19207e+06	199337	129131	601678	377157	84900.1	285864	334368	334628	335740	0.0760296
MP563	6.018	78.0563		[M+H]+													162374	29729.7	33209.8	132225	20265.6	54168.4	18360	52947.1	23319.4	23408.5	27945	23282.5	0.0941128
MP564	5.286	78.0565		[M+H]+													191379	774694	786767	455997	323454	6373.52	7371.66	273316	229200	256339	259762	259800	0.0589241
MP565	5.567	78.0573		[M+H]+													93486.2	230535	192743	63106.8	27846.5	45499.2	6584.53	61901.8	43488.9	43877.4	54230.8	44888.3	0.109545
MP566	6.968	78.0605		[M+H]+													32191.2	24174.4	33815.9	27736.1	44580.5	25116	24825.4	17915.4	24075.7	24379.8	24315.6	20638.9	0.0776694
MP567	6.658	78.0605		[M+H]+													160235	56668.1	138854	78072	432162	592591	372028	633725	274830	243797	243977	250183	0.0581547
MP569	0.571	78.0968		[M+H]+													267503	238596	193441	899754	1.14914e+06	3.11155e+06	2.1827e+06	3.04016e+06	1.41377e+06	1.36491e+06	1.34435e+06	1.34533e+06	0.0237943
MP570	3.905	78.1052		[M+CH3OH+H]2+													1.60254e+06	1.32375e+06	981451	324657	363663	383454	253697	311643	690690	691251	691648	664419	0.0195681
MP571	6.053	78.1121		[M+H]+													32193.9	23315.8	32387.3	28187.3	14215.7	31361.2	31272.8	99818.9	21731	22362.1	20663.6	17610.7	0.102342
MP572	6.398	78.1123		[M+Na]+													32359.1	50950.2	30850.2	88740.7	26287.8	47776.7	150371	15249.9	30234.3	29904.2	38990.3	30359	0.136427
MP573	3.899	78.161		[M+Na]2+													684783	563886	432321	137551	181247	159603	101642	173474	70897.8	194416	201274	205195	0.386147
MP575	5.103	78.1671		[M+H]+													477331	871484	968550	637329	446373	32007.1	9496.73	7142.49	363951	379163	363904	363909	0.0207236
MP576	6.158	78.1684		[M+H]+													36147.2	32970.6	78752.2	31603.2	25510.3	27712.8	18209.1	38413	36459.7	34324.9	29361.4	36426.7	0.0978413
MP577	6.362	78.1684		[M+H]+													67447.5	75264.8	112895	54566.7	22732.7	31109.3	23252	33182.1	26674.4	25809	23929.7	26649.1	0.0499999
MP578	6.579	78.1719		[M+H]+													27086.4	29201.1	35552.6	48544.4	15123.7	145369	32659.6	26987.4	21954.8	22844.4	29000.8	21726.7	0.144322
MP581	6.046	78.2757		[M+H]+													27522.6	37597.2	30415	32003.8	16649.1	26235.5	40570.5	31835	22732.7	19352	19562.7	20161.9	0.0762002
MP582	5.953	78.2759		[M+H]+													37006.5	68242.5	40502.1	31567.1	31003.8	33090.1	21846.4	37287.7	28746.1	25698.3	29535.7	27782.2	0.059338
MP583	5.185	78.2804		[M+H]+													3.25737e+06	5.61484e+06	6.09001e+06	4.06868e+06	396548	143910	409961	328893	2.5324e+06	2.53283e+06	2.53331e+06	2.47123e+06	0.0122384
MP584	3.906	78.3248		[M+H]+													413523	300300	234730	21248.6	108775	100758	54998.1	63143.1	175808	157763	171552	164555	0.047394
MP585	6.398	78.3315		[M+H]+													26106.5	46858.5	28183.8	23607.5	13924.3	17356.7	26074.4	32039.6	26412.6	25056.7	21335.2	21223.1	0.111953
MP587	3.905	78.3804		[M+H]+													180860	179436	85656.6	19770.2	38931	63586.2	11582.7	42483.9	53563.4	93672.6	80089.8	104920	0.266443
MP588	5.342	78.3919		[M+H]+													911057	1.47072e+06	1.57366e+06	1.13294e+06	54483.7	29961.9	46371.4	22397.4	678805	655015	654762	654536	0.0181886
MP591	7.845	78.4988		[M+H]+													71213	123369	44044	27211.9	163867	13150.9	116045	73930.9	135523	78024.2	121457	106698	0.222764
MP592	0.142	78.499		[M+H]+													119790	30387.3	92143.1	124803	233359	6867.56	39922.4	98524.5	48352.9	40393.7	43619	31522.7	0.173219
MP596	7.793	78.5004		[2M+H]+													101957	78521.9	58339.4	93115.5	46701.2	32353.1	89231.7	66676.8	87232.1	80748.1	63690.6	72180.3	0.134854
MP598	0.506	78.5287		[M+H]+													85430.3	22070.4	89785.8	58173.2	83543.4	56463.8	35524	55947.3	41395.2	51508.9	41798.2	57114	0.160382
MP604	0.526	78.7568		[M+H]+													111523	124048	55892.6	86783.7	117954	87668.2	19565.1	6024.82	105774	95809.6	92931	87706.2	0.0794676
MP609	5.122	78.831		[M+H]+													771727	1.05665e+06	1.06599e+06	717839	45635.2	17431.2	75939.2	15657.4	552592	601984	565837	551889	0.0413647
MP610	6.682	78.835		[M+2H]2+													22045.1	32826.9	54542.4	66284.8	21746.8	18774.3	16778.4	17911.3	18744.1	17864.5	20100.3	17856.9	0.0567541
MP611	6.835	78.837		[M+Na]+													41757.2	48152.5	227422	71929.4	42050.1	15887	22039.1	9734.78	26034.6	21241.6	31793.6	21201.9	0.200461
MP614	5.682	78.9185		[M+2H]2+													19194.7	40453.6	22382.8	22363.3	21507.6	7903.89	26606.9	8084.7	21794.2	22683.2	20582.1	20898	0.0440727
MP616	6.549	78.947		[M+H]+													300534	25302.9	557167	208061	14964.5	26363.9	25055	17375.8	104332	109685	92403.5	44864	0.336309
MP619	7.451	78.9988		[M+H]+													2.22745e+06	982543	3.4012e+06	2.84108e+06	2.57972e+06	1.54775e+06	2.09164e+06	3.48281e+06	2.24339e+06	2.24404e+06	1.8946e+06	2.24371e+06	0.0809474
MP620	7.256	78.9988		[M+H]+													1.63425e+06	897595	1.35326e+06	383662	111483	107998	3.92047e+06	404807	97135.6	902357	918575	304028	0.753373
MP621	0.872	79.021		[M+H]+													1.97638e+06	2.00142e+06	3.01049e+06	2.15673e+06	2.04258e+06	2.03188e+06	2.4912e+06	2.1693e+06	2.18237e+06	2.02903e+06	2.1481e+06	2.00355e+06	0.0419676
MP623	0.649	79.0211		[M+Na]+													1.39154e+06	1.09631e+06	2.43024e+06	993065	1.01861e+06	541946	1.05484e+06	915272	1.12374e+06	1.12209e+06	783500	1.12231e+06	0.163414
MP624	3.286	79.0211		[M+H]+													371703	410908	385505	314687	470306	121428	267505	202427	346297	418566	378121	405969	0.0828993
MP625	3.307	79.0538		[M+NH4]+													576534	754268	788677	753304	600324	719876	635881	654930	678071	652714	660541	654278	0.0175637
MP631	4.835	79.0811		[M+H]+													373021	723937	669531	691358	549346	754621	644106	800457	578897	575499	584293	576198	0.00689897
MP635	5.878	79.1572		[M+H]+													20228.8	21786	20681.4	22573	21692.1	37543.8	20158.9	14562.1	21043.7	20963.3	20861.6	15555.9	0.13777
MP640	3.951	79.2748		[M+H]+													28617.4	19940.5	21956.4	64636.5	4823.05	19940.5	4674.24	19940.5	10710.6	11046.1	11450.3	17662.4	0.260317
MP648	5.292	79.4802		[M+H]+													31708.2	32175.7	44038.9	19468	92208	23982.7	16134.6	32380.2	22249.6	27024.5	18345.9	24974.2	0.162078
MP649	5.58	79.5031		[M+H]+													531993	894819	1.04026e+06	530099	12921.4	19052.2	56168	49709.1	397668	405630	371834	405595	0.0405108
MP651	3.918	79.5494		[M+H]+													244235	193308	136580	17048.9	63327	46410.8	27813	45034.9	117657	118679	117372	131424	0.0559364
MP653	4.046	79.6052		[M+Na]+													279990	120363	98624.3	20924.6	21846.7	24741.4	65679.2	44552.4	108594	100043	111496	111373	0.0499766
MP656	5.529	79.6138		[M+CH3OH+H]2+													420979	1.31616e+06	1.45927e+06	902736	20726	6583.59	24755.1	16402.4	512096	563117	514922	511852	0.0478003
MP657	5.684	79.6147		[M+H]+													242656	147496	82175.6	767430	42549.8	22935.6	20305.5	56699.8	298088	295432	126966	149707	0.422629
MP662	6.944	79.6679		[M+CH3OH+H]+													20338.1	16971.1	29520.2	25393.3	37476.1	61660.4	17258.8	13619	15074.6	17305.7	17286.4	16833.9	0.0635438
MP666	5.406	79.7244		[M+H]+													486214	798609	900691	524094	14397.4	317511	10949.9	15046.5	306600	303316	303296	315455	0.0186851
MP667	6.271	79.7252		[M+H]+													29897.8	32585	280980	42829.7	213256	49342.6	16294.6	306697	30415.4	30752.9	36866.5	34602.1	0.0939972
MP668	7.2	79.7256		[M+ACN+H]+													147181	176041	605904	181977	14066.2	10570.8	19344.5	10050.3	73016	78986.4	57688.7	79021.7	0.139428
MP670	6.935	79.7814		[M+H]+													270181	26003	89968.5	84598.5	25041.9	13670.7	69386.8	14695.5	56431.1	53893.6	39512.8	47218.7	0.153731
MP672	6.792	79.8331		[M+Na]+													170943	93622.1	321458	62677	110543	110827	68039.4	110624	84819.8	85197.8	32090.2	78292.5	0.3643
MP673	6.488	79.8358		[M+Na]+													26966.2	27032.6	22775.6	32051.9	23976.2	30042.5	14170.9	26496.3	23837.8	22133.1	19716.9	19360.9	0.0993827
MP674	5.424	79.8377		[M+H]+													5.92363e+06	9.98621e+06	1.04472e+07	6.84136e+06	625204	297531	680030	544139	4.26781e+06	4.25289e+06	4.21115e+06	4.21084e+06	0.00688033
MP678	0.58	79.8717		[M+H]+													1.1531e+06	1.16977e+06	1.04225e+06	1.77763e+06	1.78628e+06	2.20426e+06	2.50474e+06	2.49116e+06	2.12206e+06	2.0736e+06	2.09101e+06	2.07849e+06	0.0104158
MP679	6.684	79.8888		[M+ACN+H]+													133497	217828	112353	72904.8	19094.3	11737.1	53241.8	15867.6	47031.3	37237.1	46686.1	36427.7	0.138601
MP680	6.87	79.8889		[M+H]+													34931.5	26121.2	39904.4	45188.3	25012	17791.1	49237.9	24015.4	30247.5	41672.6	37278.1	20733.9	0.2813
MP681	6.395	79.8916		[M+H]+													22805	42185.2	29864	25574.7	29076.8	23118.9	22735.6	19849.9	20966.4	19245.9	20620	20985.8	0.040239
MP685	5.429	79.9492		[M+H]+													1.75561e+06	2.78747e+06	3.09968e+06	1.95246e+06	67399.7	35870.4	121778	84719.1	1.22205e+06	1.22218e+06	1.18415e+06	1.22299e+06	0.0157741
MP686	0.586	79.9895		[M+H]+													2.12071e+06	2.26604e+06	2.69816e+06	815348	905787	385723	508230	642254	828907	992619	843145	918484	0.0843693
MP687	7.392	79.9966		[M+H]2+													236483	204808	80631.6	71989.3	59909.2	117162	103101	412617	187363	167460	94529.9	94206.4	0.357856
MP688	7.182	80.0493		[M+H]+													110580	122072	155976	33183.3	138061	104118	44009	162999	74079.1	135662	106005	66622	0.331695
MP689	0.646	80.0493		[M+H]+													205935	261012	200106	241442	220574	237402	253194	297016	244037	243875	252330	252439	0.0196109
MP690	6.485	80.0493		[M+H]+													93616.2	36584.7	39704.7	120794	68341.8	23727	115321	107664	102458	95748	96583.5	109957	0.0648834
MP691	7.305	80.0493		[M+H]+													112172	157309	154373	413551	361060	603998	351375	403403	137591	156992	154183	67547.9	0.324641
MP692	7.592	80.0567		[M+H]+													51644.7	31601	39456	47644	44080.9	34309.8	46939.2	60433.6	47489.4	34681.5	44769	37859.7	0.144238
MP693	4.72	80.0576		[M+H]+													288549	166173	480572	322577	77388	103505	86298.8	71929.4	136380	75432.9	131553	138041	0.249869
MP694	5.392	80.0606		[M+H]+													113080	374692	385189	218414	153932	115853	34720.2	31987.1	66413.5	66628.2	60469.3	52511.2	0.107971
MP697	6.91	80.1207		[M+ACN+H]+													15573.1	31909.1	24882.4	20802.5	13143.3	16152.3	22124.7	18728.2	17478.7	17535.8	17454.6	18947.9	0.0408796
MP698	5.545	80.1643		[M+H]+													45100.4	245878	183283	111084	61650.2	13078.8	27137.2	53458.2	122852	132166	119872	132524	0.0509127
MP699	6.462	80.1693		[M+H-H2O]+													36523.2	54179.7	33219.4	54458.3	17392.1	15322.8	20964.6	12416.5	24046.6	21158.7	24033.3	23288.5	0.0588918
MP701	6.226	80.2763		[M+H]+													21906.5	24048.7	46977.7	21939.9	46518.7	16663.4	20551.8	15850.2	28742.5	16280.7	31024.8	16974.9	0.331745
MP702	6.144	80.2793		[M+H]+													473153	888767	712854	95148.7	29258.3	36360.4	236194	24578.5	263082	265795	202416	265073	0.125007
MP704	6.674	80.3082		[2M+Na]+													20225.2	28112.9	36778.3	31462.2	19083.9	35063.9	19394	27762.3	34288.5	33813.5	30313.9	33930.8	0.0562004
MP709	5.431	80.3884		[M+CH3OH+H]+													1.74824e+06	2.25555e+06	2.46453e+06	1.10979e+06	171506	74947.4	247755	181366	1.16857e+06	1.16448e+06	1.17421e+06	1.10672e+06	0.0272517
MP710	5.882	80.3906		[M+Na]+													38342.9	116032	32188.6	32478.5	36766.6	31594.3	22550.3	48390.8	27304.3	34351.9	27774.6	33860.7	0.123335
MP712	5.996	80.446		[2M+H]+													25801.1	22071.3	21782.7	19308.4	16687.9	26652.7	19712.3	20182.8	21111.1	20936.4	20659.4	23449.3	0.059751
MP714	3.918	80.4955		[M+H]+													1.56613e+06	1.30792e+06	867955	349660	391151	375099	230860	283483	631709	641104	641214	609687	0.0235291
MP715	5.267	80.4999		[M+ACN+H]+													502996	376707	564792	268015	324709	290830	21375.9	32270.7	310731	310291	263074	310789	0.0795593
MP716	6.429	80.5023		[M+H]+													33638.3	36808.4	36341.8	25648.3	453834	14119.1	232372	323654	22110.7	22226.7	28682.9	22229.1	0.136378
MP717	3.917	80.5512		[M+2H]2+													994829	890417	586557	225663	254726	257328	138939	205085	422163	422142	423370	432728	0.012038
MP718	6.304	80.5582		[M+H]+													32353.7	42077	53990.2	37473.1	195096	15328.1	103406	19041.4	23942.3	33156.5	29426.3	27015.6	0.137147
MP721	3.917	80.6068		[M+2H]2+													352765	298916	216914	71313.1	122959	98478.5	58184.8	55714	147253	138003	128575	133285	0.0582936
MP730	6.886	80.7561		[M+NH4]+													24007.2	28379.9	24603.4	21599.8	18452.8	23986.5	23803.5	24648.8	21256.4	21385.2	19655.1	21864.8	0.045621
MP731	0.575	80.7591		[M+H]+													31106.3	218031	15097	89989.6	247784	336840	535456	371413	225737	240605	211729	237876	0.0576271
MP732	3.917	80.7707		[M+H]+													231777	288935	136617	15063.1	51178.2	51119.4	22400.9	39473.9	129316	130056	129731	102669	0.109962
MP735	4.003	80.8263		[M+Na]+													88698.1	68369.4	45536	34495.9	30092.2	27457.2	5942.01	28212.4	25138.6	18958.1	18615	19135.9	0.152737
MP739	0.614	80.9476		[M+H]+													1.10546e+07	1.3384e+07	1.68021e+07	2.43829e+07	2.67821e+07	7.56521e+07	3.38471e+07	5.56856e+07	3.12523e+07	3.00795e+07	3.12516e+07	3.12547e+07	0.018949
MP740	6.995	80.9476		[M+H]+													2.00249e+06	1.47775e+06	2.29791e+06	82655.2	1.63746e+06	2.0028e+06	1.97478e+06	1.01177e+06	2.15322e+06	2.07525e+06	827182	2.08632e+06	0.358333
MP741	0.742	80.9476		[M+Na]+													1.24592e+07	1.14328e+07	1.36021e+07	2.23283e+07	2.2746e+07	5.70581e+07	2.54443e+07	4.12793e+07	2.44495e+07	2.42824e+07	2.46483e+07	2.52708e+07	0.0175183
MP742	0.799	80.9476		[M+H]+													1.47353e+07	1.18002e+07	1.49771e+07	2.19021e+07	2.60394e+07	5.89051e+07	3.61446e+07	6.12108e+07	2.86896e+07	2.93171e+07	2.9331e+07	2.87023e+07	0.0125033
MP743	7.499	81.0281		[M+H]+													56654.8	42168.6	86035.2	14970.6	98567.4	15169.8	51759.2	33616	14563.4	12427	15273.5	15266.6	0.0935591
MP744	5.613	81.0445		[M+H]+													58371.8	29826.7	20852	20841.3	18905	17885.3	19610.3	133847	23930.6	29108	34695.4	24607.5	0.176952
MP746	3.378	81.0693		[M+H-H2O]+													28978.1	25667.7	24218	16330.6	29569.7	25111.3	30324.6	27165.5	18395.1	29449.5	30058.4	19848.8	0.252558
MP751	5.715	81.1711		[M+H]+													251223	1.21297e+06	1.36628e+06	704526	12381.4	35979.4	27635.8	14165.2	443205	433926	404780	443303	0.0422464
MP752	6.337	81.2006		[M+H-H2O]+													26837.4	27374.1	33640.3	25147.7	22630.5	15539.6	22786	15887	23354.2	21052.8	21911.1	21086.6	0.0493231
MP754	5.129	81.391		[2M+NH4]+													47544.1	235694	21283.1	82144.1	64131.4	25463.5	42686.1	42792.5	31277.2	42031.1	34632.9	28777.4	0.168458
MP755	6.796	81.395		[M+H]+													38430.4	19233.1	30738.8	21373.9	12036.9	7490.24	15788.2	40812.8	20390.8	29404.9	25323	26325.1	0.147513
MP756	6.597	81.3951		[M+H]+													81735.8	34547.2	113157	28790.9	16302.9	621632	320714	510317	165695	121322	165796	165580	0.143497
MP757	5.688	81.3951		[M+H]+													4.71594e+06	6.5556e+06	7.63465e+06	4.58639e+06	255336	355605	449436	744551	3.14394e+06	3.17509e+06	3.03027e+06	3.09479e+06	0.0203062
MP758	5.983	81.3951		[2M+Na]+													41016.6	50629.7	78039	45584.3	94901	28047.1	28684.8	100690	79208.3	92802.1	78729	93826.3	0.0962983
MP764	5.731	81.5066		[M+H]+													1.32057e+06	2.13469e+06	2.49519e+06	1.57204e+06	55666.5	8518.52	174448	165825	977828	977654	747044	979807	0.125678
MP765	4.515	81.5203		[M+H]+													626816	356871	673478	524736	163972	459724	1.00554e+06	923327	542961	607250	602493	478064	0.108681
MP766	7.449	81.5203		[M+NH4]2+													1.61905e+08	1.59888e+08	1.62154e+08	1.58071e+08	1.56955e+08	1.46687e+08	1.6332e+08	1.62727e+08	1.64215e+08	1.60981e+08	1.59707e+08	1.59754e+08	0.0131402
MP767	3.339	81.5204		[M+H]+													3.166e+06	2.03558e+06	1.70273e+06	2.40977e+06	1.49176e+06	2.99376e+06	3.35822e+06	4.17481e+06	3.7727e+06	3.82833e+06	2.34794e+06	3.49924e+06	0.20559
MP768	0.533	81.5204		[M+NH4]+													2.08122e+06	2.89332e+06	1.94933e+06	1.34198e+06	1.39571e+06	52605.6	1.29022e+06	136615	904159	904961	905047	1.13783e+06	0.121035
MP769	3.439	81.5204		[M+Na]+													2.13422e+06	2.44347e+06	2.47523e+06	3.49931e+06	1.8636e+06	1.66535e+06	1.52059e+07	1.1736e+07	3.33903e+06	2.91769e+06	3.34006e+06	3.12636e+06	0.0635531
MP773	4.912	81.6149		[M+H]+													767618	1.35613e+06	1.48344e+06	567263	9312.29	449957	37535.8	8862.62	445600	445380	444871	358785	0.102088
MP774	5.82	81.6178		[M+H]+													29271.2	93550.7	99960.2	32168.8	40885.7	30448.6	30448.6	10053.9	23011.9	15417.7	15513.9	15643.4	0.215247
MP776	0.581	81.6466		[M+H]+													1.82206e+06	1.5141e+06	1.57435e+06	1.55896e+06	1.66909e+06	472668	1.70234e+06	802623	1.58681e+06	1.60609e+06	1.5784e+06	1.60312e+06	0.00829126
MP777	6.978	81.6722		[M+NH4]+													41230.2	28658.7	31469.6	29031.1	48865.4	29019	20193.3	32218.3	21811.4	22791.2	21499.9	21507.4	0.0278499
MP778	5.865	81.7218		[M+Na]+													38384.9	74506.1	168583	109488	18504.5	26213	53523.5	15209.6	29353.6	33898.3	33580.8	25703.4	0.126834
MP781	4.931	81.7862		[M+Na]+													107922	101151	102042	80226.9	100921	54485.8	103949	26675	92089.9	79153	75390.1	83658.1	0.087061
MP783	4.785	81.8297		[M+H]+													270831	600889	408308	201974	213767	131670	11120.9	170331	129777	125830	124731	124793	0.018872
MP785	7.295	81.8562		[M+ACN+H]+													21707.3	17422.4	11145.6	28225.4	29034.5	23135.7	18799.3	30634.9	27692.2	15436.4	24298	35008.3	0.317147
MP793	5.695	81.9457		[M+H]+													1.0862e+06	1.30609e+06	1.48298e+06	1.06744e+06	84712.9	35082	271827	237805	810893	944189	806237	846691	0.0751876
MP794	4.041	81.9788		[M+H]+													185967	120356	34672.1	214030	104945	93215.9	90798.1	41534.2	73022.8	74106.9	70069	71174.1	0.0251487
MP795	0.578	81.9876		[M+H]+													76077.5	65326.6	5692.33	51797.1	49867.9	4964.82	63125.1	5757.9	25476.6	25126.7	8758.94	22956.9	0.386738
MP796	0.51	82.0136		[M+H]+													6.36134e+06	6.39907e+06	3.85958e+06	3.93094e+06	4.37752e+06	3.40766e+06	1.13825e+06	2.33056e+06	3.88693e+06	3.9105e+06	3.8104e+06	3.71629e+06	0.0228717
MP798	5.519	82.057		[M+H]+													212460	166197	230035	47794.7	31911.9	39794.5	60302.3	29404.4	89628.9	88783.5	66191.9	82652.3	0.132849
MP799	1.076	82.0649		[M+H]+													153584	27366.4	43287.3	12352.8	19688.2	19814.8	17702.9	29978.4	25770.4	20373.1	22527.3	19642.3	0.124523
MP801	5.68	82.133		[M+H]+													32137.4	40770.2	34505.9	42643.6	39830.8	26618	19260	10124.3	34899.3	34689.7	39115.9	38974.5	0.0665304
MP803	6.473	82.1695		[M+H]+													28532.3	84122.3	84763.9	30016.1	284918	19060.3	75891.7	70660.3	79715.5	79634	42261	79723.1	0.266089
MP806	7.084	82.2273		[M+H]+													33662.2	90355.6	202784	21552.3	11308.4	39795.7	11394.6	39795.7	17261.7	17339.6	24083.3	17109	0.180735
MP808	6.937	82.2274		[M+H]+													85702.2	99574.6	22533.6	25848.5	13029.9	34013.8	34013.8	33984.2	32253.7	29513.4	32935.1	29880.1	0.0546628
MP809	7.31	82.2554		[M+H]+													48020.3	27683.9	23575.3	50885.9	27684.1	21697.2	30596.6	53896	19352.3	20764.3	15396.9	20899.8	0.134434
MP815	4.677	82.3299		[M+H]+													30239.2	14693.4	683299	664475	14104.5	1.86219e+06	1.48196e+06	2.0316e+06	664061	615954	651028	659146	0.0335681
MP821	0.517	82.4919		[M+Na]+													26771.3	75455.8	22878.7	41915.9	26980	44738.4	9165.94	17701.6	26501.7	25378.6	30952.7	25305.3	0.09872
MP822	3.329	82.5368		[M+H]+													1.27924e+08	154118	1.1382e+08	194647	2.57472e+07	9.67885e+07	1.3243e+08	2.9145e+08	1.20093e+08	6.87975e+07	1.33747e+08	1.21214e+08	0.259398
MP823	0.986	82.5368		[M+ACN+H]2+													1.05683e+07	9.21364e+06	7.15894e+06	6.61754e+06	7.69594e+06	4.02756e+06	502150	2.55752e+06	6.51393e+06	6.34688e+06	6.46032e+06	6.51382e+06	0.01219
MP824	0.51	82.5368		[M+H]2+													4.79983e+08	4.85177e+08	3.02724e+08	3.01823e+08	3.62996e+08	2.91319e+08	1.0088e+08	2.01392e+08	3.11067e+08	3.09142e+08	3.05989e+08	3.11095e+08	0.00777064
MP825	7.424	82.5368		[M+H]+													3.08078e+06	2.92053e+06	2.90487e+06	3.1319e+06	3.22134e+06	2.909e+06	2.9667e+06	2.8609e+06	3.01604e+06	3.0153e+06	2.93856e+06	3.01589e+06	0.0128795
MP826	3.514	82.5369		[M+2H]2+													5.74838e+07	65779.9	3.53706e+07	41491.4	1.19143e+07	2.08835e+06	7.49234e+07	3.01909e+06	6.94191e+06	2.74675e+06	2.90873e+06	4.3962e+06	0.457364
MP834	4.339	82.803		[2M+NH4]+													90569.6	100459	86078.5	95784.2	56014.6	38034.7	22058.6	51076.3	35879.1	37037.2	31071	23187.9	0.1979
MP836	5.387	82.8376		[M+H]+													251661	445261	281310	264948	11081.4	146974	146974	146974	104744	77093.1	90622.9	93759.6	0.124346
MP838	3.929	82.9413		[M+H]+													1.05489e+06	846551	667677	253700	259775	249040	156749	202170	423950	408246	415064	407937	0.0181825
MP839	0.614	82.9446		[M+H]+													3.57004e+06	4.07204e+06	5.51445e+06	8.48188e+06	9.04106e+06	2.5554e+07	1.14029e+07	1.93232e+07	1.07211e+07	1.03289e+07	1.03314e+07	1.04336e+07	0.0176751
MP840	0.742	82.9447		[M+H]+													4.07059e+06	4.04809e+06	4.66151e+06	7.34669e+06	7.57961e+06	1.77864e+07	8.65638e+06	1.3492e+07	8.12254e+06	8.27376e+06	8.32001e+06	8.31904e+06	0.0113082
MP841	0.799	82.9447		[M+NH4]+													4.82875e+06	4.06749e+06	4.75948e+06	7.25128e+06	9.85384e+06	2.05735e+07	1.25962e+07	2.03274e+07	9.23232e+06	9.30212e+06	9.64481e+06	9.58065e+06	0.0215256
MP842	6.362	82.9523		[M+H]+													61551.4	75230.3	33803.7	103923	717290	150406	410973	873654	134337	89224.2	106809	39303.8	0.432617
MP843	6.134	82.9523		[M+H]+													85586	151646	177711	137125	87576.7	64849.2	220533	62392.8	46784.7	34083.7	49530.8	49514.1	0.164009
MP844	4.015	82.9971		[M+2H]2+													685968	572756	33285.1	151565	157492	150174	4701.34	121051	284898	280336	275047	270028	0.0232164
MP845	3.134	83.0372		[M+H]+													406167	6738.73	296731	6592.29	394168	1.23223e+06	1.02289e+06	3.2993e+06	601288	486392	554790	485679	0.106025
MP846	3.77	83.0372		[M+H]+													6.37004e+06	10014.8	461652	5594.99	123047	193955	1.65875e+06	1.09308e+06	837599	618498	616484	726289	0.150438
MP847	3.837	83.0601		[M+H]2+													2.60427e+07	1.08163e+07	2.36439e+07	1.70404e+07	1.44122e+07	2.08305e+07	1.89943e+07	1.38889e+07	2.4516e+07	2.55954e+07	2.45009e+07	2.56257e+07	0.0253978
MP850	0.647	83.0601		[M+H]+													5.20215e+06	7.91335e+06	8.20369e+06	8.08593e+06	9.87705e+06	2.16189e+07	1.18811e+07	8.93023e+06	8.47138e+06	8.23333e+06	8.47049e+06	8.3984e+06	0.0133506
MP851	5.561	83.0602		[M+H]+													1.15777e+07	1.13896e+07	7.23003e+06	1.40414e+07	1.64429e+07	2.72833e+07	1.52637e+07	2.36208e+07	6.3966e+06	8.62688e+06	8.59506e+06	8.10107e+06	0.132431
MP852	3.293	83.0602		[M+H]+													2.31412e+07	1.95553e+07	3.14297e+07	3.06357e+07	3.02348e+07	2.05962e+07	3.14709e+07	1.19133e+07	2.07043e+07	1.92212e+07	2.06984e+07	2.07141e+07	0.0365009
MP853	0.552	83.0602		[M+H]+													9.11995e+06	1.04849e+07	1.40701e+07	1.42251e+07	5.05713e+06	6.36348e+06	1.21742e+07	5.12735e+06	1.01726e+07	9.43067e+06	1.06275e+07	9.46484e+06	0.0584958
MP859	5.193	83.1723		[M+ACN+H]+													898539	2.45065e+06	2.73119e+06	1.71592e+06	121763	22193.7	108293	112724	817433	815076	854178	902676	0.0483927
MP861	4.014	83.2165		[M+H]+													63129.2	111793	43197.2	38107.5	12654.3	37574.4	55038.3	23312.6	59689.2	53069.8	24676	60473.6	0.340849
MP864	5.224	83.2838		[2M+H]+													361776	325874	771145	430559	8030.17	26931.9	19286.4	264432	265335	249518	242272	241413	0.0443864
MP869	5.252	83.3871		[M+H]+													295073	663911	494805	325730	26463.8	10806.7	222916	222916	213196	215905	210920	211817	0.0102142
MP871	0.588	83.4215		[M+ACN+H]+													1.25688e+06	1.20926e+06	1.23984e+06	832146	678261	77798	340198	4858.22	534572	527104	531237	534552	0.00665729
MP872	7.454	83.5168		[M+H]+													1.26381e+06	1.80593e+06	1.59193e+06	1.55002e+06	1.13269e+06	1.79787e+06	1.07875e+06	1.64738e+06	1.74217e+06	1.62524e+06	1.75803e+06	1.205e+06	0.163407
MP873	3.919	83.5355		[M+H-H2O]+													26650.7	14095.7	73218.1	18555.4	84493.9	480948	431587	551199	526592	569479	207119	749864	0.440053
MP874	0.511	83.5356		[M+NH4]2+													7.26822e+07	7.3358e+07	4.51428e+07	4.4895e+07	5.46391e+07	4.41144e+07	1.48444e+07	3.01021e+07	4.65555e+07	4.62845e+07	4.582e+07	4.59561e+07	0.00717422
MP879	5.292	83.7228		[M+H]+													175570	404641	311550	304754	213063	168511	62756.4	37813.4	159317	167595	152662	151951	0.0460861
MP886	6.273	83.8512		[M+H]+													24588.4	22669.2	22457.7	22464.5	21774.1	22099.1	18652.4	14821.4	20670.7	22370.7	20627.2	20627.3	0.041032
MP888	5.363	83.9377		[M+H]+													47079.2	49658.4	34370.4	30327.2	18540.5	33183.2	24768.5	21443.5	37149.3	26193.8	37706.6	37231.3	0.161692
MP889	7.504	84.0441		[M+H]+													937571	899182	706445	974132	499589	100650	1.49822e+06	582242	649590	495827	618351	573766	0.114197
MP890	0.91	84.0441		[M+H-H2O]+													5.06643e+06	2.76964e+06	3.58153e+06	4.16813e+06	1.05256e+06	2.96526e+06	2.76287e+06	1.97921e+06	3.66785e+06	3.97421e+06	3.70065e+06	3.66534e+06	0.0397135
MP891	0.685	84.0442		[M+H]+													4.56244e+06	1.52432e+06	1.12288e+06	4.37178e+06	2.09619e+06	2.47697e+06	1.3926e+06	1.76338e+06	3.67938e+06	3.38155e+06	3.23638e+06	3.60758e+06	0.0587243
MP892	3.598	84.0554		[M+H]+													596817	1.44518e+06	1.16687e+06	1.63693e+06	1.55813e+06	1.42468e+06	1.66584e+06	1.15209e+06	1.04949e+06	841822	1.04636e+06	1.0545e+06	0.104405
MP893	4.546	84.0635		[M+H]+													1.17304e+06	1.12714e+06	1.32757e+06	1.26269e+06	968452	1.24561e+06	1.08776e+06	1.3412e+06	1.22612e+06	1.3213e+06	1.15395e+06	1.33914e+06	0.068594
MP894	5.563	84.0805		[M+H]+													20777	48029.4	373985	41836.7	614237	956084	16515	675887	483188	384859	505304	513260	0.125611
MP899	6.84	84.2479		[M+H]+													39333.6	52165.8	157780	54546.4	47786.2	67706.9	68993.2	122053	61795.8	68107.4	35220.4	31335.3	0.377391
MP901	6.239	84.3056		[M+NH4]+													27726.5	28423.2	26820.2	25188.4	26234	29451.5	23808.5	24148.4	24606.8	27460.2	27523.5	26044.1	0.0523235
MP904	5.606	84.395		[M+ACN+H]+													589735	521714	1.08029e+06	560199	384409	25146.9	40028.1	26691.9	257359	247876	280163	280142	0.0614217
MP905	5.19	84.4374		[M+H]+													25805.7	36004.5	15376.9	18724.8	22855.5	16565	20808.8	16565.5	12699.3	13135.7	14524.9	12595.9	0.0671228
MP909	5.556	84.5055		[M+ACN+H]+													137846	306279	694452	356836	30234.3	17185.1	188307	23450.2	161496	154073	151958	157478	0.0266959
MP910	0.576	84.5361		[M+H]+													41207.7	9512.94	7420.02	179907	289193	95403.8	485686	317887	214967	159110	187322	170360	0.132814
MP915	5.287	84.6162		[M+H]+													364930	682354	735399	444527	21206.7	265121	13106.7	33447.5	258842	264037	251135	261475	0.021545
MP924	5.381	84.7296		[M+H]+													2.90389e+06	4.64172e+06	4.98033e+06	3.31548e+06	125933	53451.8	173094	181389	2.11393e+06	2.07505e+06	2.01587e+06	2.10122e+06	0.0209737
MP931	5.347	84.8411		[M+H]+													467410	1.40394e+06	899463	970009	12237.9	29416.3	19498.6	44490.7	629619	605955	606950	605677	0.0191571
MP935	0.594	84.911		[M+CH3OH+H]+													2.28885e+06	1.1366e+06	2.06226e+06	1.77458e+06	1.83495e+06	414098	984680	344022	1.26706e+06	1.17413e+06	1.02256e+06	1.1745e+06	0.0873265
MP937	7.285	84.9594		[M+H]+													56722.7	163490	344165	74843.1	186726	25704.2	26711.8	80744.2	23176.5	36051.6	39707.5	42745.3	0.243054
MP938	7.576	84.9595		[M+H]+													60776.3	22225.8	80305.2	48487.5	38652.7	17536.5	21599.3	25017.7	33005.9	33072.5	34199.4	38557.4	0.0755874
MP939	7.337	85.0394		[M+H]+													1.08438e+06	316705	390576	1.71945e+06	1.84766e+06	544388	531114	1.00418e+06	598497	483210	632075	633301	0.120828
MP940	0.436	85.0507		[M+H]+													391829	318784	427116	235255	289573	338968	324824	212145	334100	189672	364264	368128	0.268426
MP941	6.657	85.0645		[M+H-H2O]+													507683	454321	405195	434662	372072	571639	502935	482975	549688	572826	556913	587556	0.0298343
MP942	3.704	85.0658		[M+H]+													245167	95042.2	562987	134009	284717	110495	402295	161224	181140	176408	205223	204773	0.0795488
MP943	7.888	85.0758		[M+H]+													337821	220625	454066	434594	652815	364476	1.00857e+06	296216	271223	269894	353717	352413	0.152788
MP944	4.424	85.0758		[M+H]+													546359	176180	60859.1	30114.3	453415	10467.7	40108.6	146285	31541.4	84615.4	121247	119495	0.470647
MP945	5.484	85.0758		[M+H]+													694151	10678.1	785650	14394.5	2.17473e+06	120971	18772.8	3.11764e+06	284393	277331	508898	463557	0.312971
MP946	0.668	85.0758		[M+H-H2O]+													2.76628e+06	2.74132e+06	2.70686e+06	3.51922e+06	3.05674e+06	3.17786e+06	2.27526e+06	2.3597e+06	2.8833e+06	2.87424e+06	2.85806e+06	2.78389e+06	0.0158642
MP949	6.334	85.1676		[M+H]+													50693.5	45709.2	49500.3	28449.8	24963.3	42877.3	46394.7	17297.4	43895.8	26515.7	39844.8	47767.4	0.234003
MP950	6.214	85.1711		[M+2H]2+													228491	447543	290976	30039.2	20776.5	16561.9	109645	14799.1	125926	132396	121022	118836	0.0482979
MP952	5.352	85.2801		[M+H]+													655351	859988	510385	473900	11616.6	325667	11807.8	13521.8	409609	364003	396533	410592	0.055045
MP956	6.808	85.3463		[M+H]+													30677.7	29970.8	30850.2	22563.5	28510.1	15791	18311.3	19910.6	33587.3	31557.3	31711.1	33618.7	0.0349037
MP957	3.939	85.3873		[M+ACN+H]+													638055	556720	344037	160803	137700	117362	67428.4	100833	252380	255475	256968	248569	0.0146631
MP959	5.38	85.3941		[M+H]+													81923.6	114685	69922.7	56492.1	70681.5	62736.1	12173.8	29504.5	74830.1	73910.2	78198.4	69797.5	0.0465984
MP961	0.582	85.4235		[M+H]+													6602.22	206595	34457.9	74601.8	216128	65412.5	227730	162577	176739	171595	200409	197734	0.0780861
MP962	3.938	85.4431		[M+H]+													387875	348804	240487	51134.2	104712	95472.3	43510.2	70822.9	154090	168885	164036	168791	0.0424081
MP965	3.99	85.4987		[M+2H]2+													203784	111264	66691.4	17864.6	26727.4	68237.6	17346	12269.9	47614.2	56829	44997.5	44566.8	0.117776
MP966	7.148	85.5035		[M+H]+													19322.6	81166.7	22486.3	19597.3	12743.7	12755.1	43504.9	17236.4	20088.1	19906.7	20072.5	26278.1	0.144948
MP968	7.017	85.5061		[M+H]+													21874.3	31473	29312.1	18264.7	14056.8	14852.6	20275.5	22769.6	20397.7	19611.2	20398.1	20075.7	0.018493
MP969	5.538	85.5202		[M+Na]2+													318025	72320.6	63739.2	313056	25464.1	119551	175541	146003	140167	132053	132681	155546	0.0780076
MP977	0.568	85.651		[M+H-H2O]+													67150.1	790107	120227	285845	716430	2.39382e+06	1.57074e+06	2.45104e+06	599759	709010	709199	709436	0.080264
MP989	4.662	85.8247		[M+H]+													93096.3	151666	33606	46914.5	22444	87573	13458.9	15292.9	62735.1	58070.8	64393.9	64415.6	0.0479782
MP993	6.063	85.9523		[M+H]+													20430.2	170639	34246.1	27710.3	20137.1	30327.8	19991.5	36729.3	42763.3	32825.8	32967.1	32709.9	0.140604
MP994	6.449	85.9891		[M+H]+													25018.5	30328.6	32601.5	36209.6	16343.3	14634.3	26831.9	34077	38775.9	38996.2	41777.6	38755.7	0.037182
MP995	0.044	86.006		[M+H]2+													30038.1	48449.4	32100.9	6234.73	64032.7	12817.6	28083.3	25740.2	33688.5	40332.7	33909.7	35856.1	0.085735
MP996	0.126	86.0061		[M+H]+													46181.2	7986.6	6688.3	5468.37	6666.71	41167.6	24867.7	5992.6	14898.4	16487.4	12990.1	12527.9	0.128192
MP997	0.936	86.0233		[M+H]+													59565.1	15164.7	11096.5	6793.06	7206.99	8974.24	12104.7	9704.33	7822.87	6260.12	5671.21	5755.44	0.156507
MP998	2.178	86.0234		[M+H]+													310114	4252.14	4234.21	7830.87	10773.7	5019.16	3965.95	6588.14	28146.4	22199.9	12486.1	30275.9	0.34216
MP999	3.449	86.0598		[M+H]+													761270	316234	42558.7	1.26369e+06	1.12641e+06	1.14441e+06	588279	803163	1.19223e+06	1.2424e+06	1.22925e+06	1.19254e+06	0.0211234
MP1001	0.155	86.0599		[M+H]+													716221	1.04637e+06	529325	993579	798506	352750	645843	658416	670972	409630	713827	718653	0.234496
MP1002	5.189	86.063		[M+H]+													142814	966755	1.67916e+06	36374.9	294758	229828	115192	370914	229520	228900	242399	280830	0.0994975
MP1004	0.862	86.0962		[M+H]+													458127	114837	98086.4	141065	64941.6	7.02378e+06	56673.9	79819.7	80896.4	108300	87652.8	75162.5	0.164341
MP1006	5.032	86.1405		[M+H]+													18011.7	22898.4	174283	320175	62334.8	60032.9	48542.8	101915	78846.8	75927.5	75890.5	88146.7	0.072734
MP1007	5.833	86.1735		[M+H]+													305318	470047	582847	315109	88389	178266	23056.3	15648.4	157038	139111	138713	138373	0.0639013
MP1012	5.626	86.2869		[M+H]+													4.80414e+06	7.58827e+06	7.97167e+06	5.03078e+06	285019	222585	499474	169781	3.33115e+06	3.33143e+06	3.23716e+06	3.33338e+06	0.0143358
MP1013	6.225	86.2869		[M+H]+													28223.6	18751.8	33213.4	43110.4	24359.3	274960	132772	171799	50147.6	30796.3	57926.1	53103.7	0.248045
MP1018	6.647	86.3984		[M+H]+													21802.1	24551.2	27197.5	20876.7	24287.1	54178.4	21478.3	21282.4	18422.1	17202.2	19825.3	20209.8	0.0727574
MP1019	5.645	86.3984		[M+H]+													1.62023e+06	2.30007e+06	2.56831e+06	1.57227e+06	23175.8	39495.1	49256.1	35141.3	1.04106e+06	1.02919e+06	1.00938e+06	1.00982e+06	0.0151751
MP1025	4.98	86.5067		[M+H]+													85539	241926	379074	148152	38498.5	81096.5	74282.8	28605.4	48740.9	54902.4	43719	42186.8	0.12111
MP1026	5.808	86.5098		[M+H]+													60895.9	208388	335790	47074.8	22529.3	70218.2	9706.51	70218	37423.5	40453.5	28154.5	40504.6	0.159241
MP1041	5.654	86.8376		[M+H]+													1.19484e+06	1.37233e+06	1.43168e+06	950975	75011	18503.7	103446	46421.3	851288	856406	818226	818944	0.0244766
MP1046	0.599	86.9084		[M+H]+													660941	364021	240538	58611.6	202190	363541	72354.1	82641.8	179183	179204	179211	213067	0.0902346
MP1047	0.548	86.9086		[M+H]+													25983	165436	296085	323882	101647	344241	44091.9	40565.8	114147	135472	108112	138610	0.122619
MP1048	5.869	86.9489		[M+H]+													314690	360714	193517	82943.4	155136	24748.3	41692.2	131141	123656	144143	124057	123867	0.0786708
MP1051	0.998	87.0438		[M+NH4]+													537353	532348	753842	879553	545519	480799	534538	690889	576849	591058	583015	591172	0.0118357
MP1052	7.164	87.055		[M+H]+													9.98493e+06	1.63974e+07	1.37966e+07	3.16771e+07	2.76933e+07	2.56614e+07	1.43263e+07	4.48618e+07	2.23094e+07	2.58405e+07	2.59119e+07	2.42191e+07	0.0691028
MP1053	6.387	87.055		[M+H]+													4.30235e+06	5.1047e+06	4.57817e+06	6.11443e+06	7.11201e+06	4.37562e+06	5.4386e+06	7.30301e+06	6.77531e+06	7.18025e+06	2.91732e+06	6.58254e+06	0.337676
MP1054	4.492	87.055		[M+H]+													556730	424596	386862	578393	285157	688855	291409	602401	410433	372322	409017	347310	0.0794661
MP1055	4.911	87.0914		[M+H]+													40830.3	8582.76	6818.3	4198.69	11285.7	14971.5	7223.45	368118	9902.16	10330.7	26315.8	11759.7	0.539614
MP1056	6.239	87.0914		[M+NH4]+													77554.4	26651.8	28397.9	27219.1	1.63309e+06	250054	187734	126731	39928	231423	259762	254841	0.534909
MP1057	0.703	87.0914		[M+H]+													638785	659997	572965	690974	774371	732291	458525	665533	627899	635408	633904	611529	0.017427
MP1060	5.751	87.1635		[M+2H]2+													25509.2	33802.8	44552.2	23877.2	15705.7	27419.6	16032.2	34147.2	22908.7	28582.8	27079.2	28646.4	0.100586
MP1072	0.577	87.426		[2M+Na]+													608294	697711	375512	1.15418e+06	1.18401e+06	1.84731e+06	2.31749e+06	1.97149e+06	1.47812e+06	1.60885e+06	1.45088e+06	1.45046e+06	0.0505202
MP1075	5.959	87.4849		[M+H]+													24501.9	27426.5	26830.1	27308.2	30215.7	27294.2	26501.1	18751.2	24402	26969.9	24372.7	24123.4	0.0537145
MP1076	0.115	87.5019		[M+H]+													38677.4	8436.15	9047.66	9859.41	8834.67	23210.6	11856.2	26096.6	13611.3	14725.6	15927.4	15416.2	0.0671517
MP1078	7.431	87.5092		[M+H]+													71465.7	53020.1	272376	99417.2	91017.3	352037	247603	334908	193127	176566	182733	217543	0.0937417
MP1079	7.562	87.5094		[M+H]+													68783.8	67395.3	247682	37871.6	16308.9	11062	36153.2	21551.2	22899.1	39731.1	39673	38017.3	0.232595
MP1081	0.505	87.5339		[M+H]+													83137.6	26796.4	20512.3	36027.1	52529.5	33086.3	25975.8	19669.7	29848.9	34490.7	37203.7	30642.5	0.103906
MP1084	6.102	87.6201		[M+2H]2+													139852	728560	768523	315651	18732.4	19908.8	19877.1	228896	166240	171954	83794.2	172098	0.291121
MP1094	3.949	87.8332		[M+H]+													370527	328152	156259	50978	68499.3	69524.1	42393.8	44560.6	137195	142263	142474	130903	0.0394185
MP1095	5.901	87.8443		[M+CH3OH+H]+													3.36955e+06	4.7642e+06	5.0041e+06	2.14323e+06	46673.4	24165.3	217964	155408	2.01577e+06	2.21746e+06	2.14571e+06	2.21491e+06	0.0439861
MP1099	4.127	87.8889		[M+ACN+H]+													231527	249992	138368	25886.6	55557	37588.6	27282.9	32537.6	86216.4	84628	86461.4	81018.8	0.0296773
MP1100	6.259	87.9557		[M+NH4]+													1.05196e+06	1.59515e+06	1.84306e+06	1.12363e+06	39132.3	19182.8	22420.7	29631	546305	547331	547366	463952	0.078913
MP1105	0.614	88.0391		[M+H]+													383730	438265	478050	358567	359613	439842	565627	369744	470489	466464	424514	442065	0.0479158
MP1106	0.652	88.0754		[M+H]+													1.25749e+07	9.73394e+06	1.44788e+07	4.91049e+06	5.7308e+06	9.88389e+06	9.26846e+06	1.0803e+07	1.03407e+07	1.06119e+07	1.05253e+07	1.04045e+07	0.0115906
MP1108	6.007	88.1117		[M+H]+													78643.4	67501.3	143445	199221	130424	285508	232742	422977	92686.8	92088.3	84025	78351.4	0.0791888
MP1109	5.524	88.1117		[M+NH4]+													131998	108119	31100	82642.6	214726	133025	62319	94710.6	65222.8	68725.2	64874.2	83978.5	0.127601
MP1110	5.323	88.1119		[M+H]+													67480.5	123438	27586.8	21454	74702.4	51905.3	44220.3	15984.1	19997.7	26671.4	26389.5	24753.3	0.126293
MP1112	5.256	88.1755		[M+H]+													20244.3	265255	31421.2	12700.7	18535.7	11827	10937.8	22592.6	24995.3	31722.4	33238.3	33412.5	0.128755
MP1113	5.111	88.1756		[M+H]+													34895.4	33069.5	132337	23704.2	34348.8	11189.4	9990.79	34181.3	24523.7	26320.8	28550.7	24408.5	0.0748269
MP1120	5.061	88.2789		[M+H-H2O]+													248410	477477	398754	268159	29495.9	169948	17292.9	47507.4	175244	170593	166197	175236	0.0252602
MP1122	0.578	88.3133		[M+H]+													4318.54	131691	42571.8	42268.7	51499.9	138788	171816	245016	191712	214751	180485	183234	0.0807905
MP1125	5.027	88.3903		[2M+Na]+													38980.4	120173	88131	38690.5	42203.2	43104.5	31428.2	20937.1	15019	12185.4	10998.4	10968.3	0.154873
MP1127	5.945	88.3948		[M+Na]+													60376.5	546773	39782.2	251351	154405	10410.5	96688.8	27187.6	146719	146839	36621.2	143220	0.460597
MP1128	6.121	88.3948		[M+H]+													396240	65818	296314	24778.3	161152	29847.8	22053.3	28670.1	203079	163898	211522	211827	0.115489
MP1134	0.633	88.5088		[M+H]+													897642	6602.46	1.92401e+06	3.52924e+06	3868.26	4099.06	4.74687e+06	3693.85	3.42033e+06	2.53581e+06	3.18869e+06	2.89765e+06	0.126885
MP1135	3.056	88.5088		[M+H]+													689609	1.44485e+06	1.43591e+06	1.31501e+06	982856	2.99627e+06	1.10601e+06	1.13427e+06	1.38989e+06	1.43645e+06	1.28726e+06	1.43915e+06	0.0511311
MP1136	7.009	88.5088		[M+H]+													5.79031e+06	1.49509e+06	4.12204e+06	2.26744e+06	1.42307e+06	166022	3.16103e+06	595517	6.82623e+06	6.86127e+06	2.02154e+06	9.44782e+06	0.492698
MP1137	7.785	88.5088		[M+CH3OH+H]+													1.33983e+07	4.15315e+07	2.71342e+07	3.83738e+07	3.76022e+07	1.35883e+07	5.49503e+07	4.27526e+07	3.54677e+07	3.80933e+07	3.73751e+07	3.32377e+07	0.0603163
MP1138	3.463	88.5089		[M+2H]2+													683388	1.21836e+06	758858	1.5007e+06	148952	1.18997e+06	713443	1.17321e+06	1.24906e+06	1.3998e+06	1.17367e+06	1.18328e+06	0.0834397
MP1139	0.022	88.5089		[M+NH4]2+													4.79875e+07	4.40032e+07	4.69002e+07	4.04012e+07	4.02926e+07	4.30039e+07	4.58396e+07	4.47049e+07	4.39513e+07	5.10706e+07	4.86134e+07	4.5706e+07	0.0664622
MP1140	7.959	88.5089		[M+H]+													1.83139e+07	1.6966e+07	2.4805e+07	1.88643e+07	2.10414e+07	1.8905e+07	1.49421e+07	1.63712e+07	1.97821e+07	1.88621e+07	2.12599e+07	2.12439e+07	0.0579578
MP1156	5.872	89.0079		[M+H]+													391181	436014	158416	211313	171360	334005	387470	458827	422888	464717	471555	336702	0.146299
MP1157	5.703	89.0079		[M+H]+													473750	431296	403446	286496	411454	356907	438640	403967	449760	439774	397193	372351	0.0875715
MP1158	4.225	89.0079		[M+H]+													447590	283879	316244	404789	403065	399963	236260	252790	395277	427066	392535	431276	0.049724
MP1159	7.436	89.008		[M+H]+													3.41016e+07	3.29802e+07	3.35695e+07	3.31015e+07	3.60527e+07	3.33699e+07	3.04981e+07	2.99489e+07	3.44017e+07	3.44175e+07	3.33756e+07	3.43007e+07	0.0146966
MP1160	0.508	89.0081		[M+CH3OH+H]+													3.68736e+06	7.25423e+06	7.93244e+06	4.67352e+06	2.46647e+06	820309	6.01101e+06	2.38069e+06	4.54933e+06	4.44691e+06	4.46981e+06	4.35814e+06	0.0176516
MP1161	3.149	89.0081		[M+H]+													751502	456418	394919	644470	641246	768824	487945	404747	447668	423197	423590	447667	0.0321796
MP1162	4.062	89.0595		[M+H]+													1.30381e+06	1.29288e+06	1.16788e+06	1.35516e+06	1.34e+06	1.3184e+06	1.35663e+06	1.44336e+06	1.34933e+06	1.341e+06	1.34928e+06	1.34103e+06	0.00356018
MP1163	0.946	89.0707		[M+H]+													126727	32063.8	211172	116097	1.18821e+06	112649	96386.2	1.03071e+06	177971	167394	439550	189418	0.537613
MP1164	0.999	89.0707		[M+NH4]+													3.87848e+06	1.91018e+07	7.4733e+06	7.06439e+06	1.44231e+07	1.20742e+07	6.8949e+06	1.25113e+07	1.17364e+07	1.17376e+07	1.13556e+07	1.15949e+07	0.0155032
MP1165	3.787	89.0787		[M+H]+													477745	268210	824419	494475	434304	300361	541679	227251	466003	524532	552973	553923	0.0786182
MP1166	3.318	89.0788		[M+H]+													1.08712e+06	678205	340981	595118	683832	808328	566137	520220	689384	688082	513357	688668	0.135963
MP1167	0.564	89.0788		[M+NH4]+													913441	473603	414028	537543	33323.4	779395	380327	815332	340731	289738	377372	287358	0.133964
MP1169	0.536	89.107		[M+NH4]+													5459.59	1.03954e+06	1.3088e+06	1.41605e+06	1.72157e+06	2.89694e+06	2.55024e+06	2.16233e+06	1.71671e+06	1.71687e+06	1.66341e+06	1.67827e+06	0.0160688
MP1170	7.405	89.1071		[M+H-H2O]+													44825.8	46984.1	22938.8	24330.1	39142.9	10196.4	35842	45264.2	44208.1	50279.3	43555.5	43908	0.0704696
MP1171	0.583	89.2009		[M+ACN+H]+													1.12386e+06	1.10276e+06	1.14502e+06	1.31589e+06	1.1143e+06	435642	1.36696e+06	567961	1.29877e+06	1.23546e+06	1.25016e+06	1.23528e+06	0.0239486
MP1173	5.15	89.3379		[M+H]+													14130.1	378326	39824.3	10684.2	21014	1.20437e+06	1.15411e+06	1.24575e+06	349983	338074	348063	319667	0.0409295
MP1183	0.022	89.5064		[M+H]2+													8.38187e+08	8.62811e+08	8.7399e+08	8.11669e+08	8.44103e+08	8.75271e+08	8.15029e+08	7.78201e+08	8.74143e+08	8.70186e+08	8.58337e+08	8.7505e+08	0.00884518
MP1184	0.996	89.5065		[M+2H]2+													1.61188e+07	5.23927e+07	1.67474e+07	2.28463e+07	5.65902e+07	2.08747e+07	1.00173e+08	1.21049e+08	4.42142e+07	4.39725e+07	4.43712e+07	3.03315e+07	0.170157
MP1185	7.941	89.5065		[M+2H]2+													2.53587e+08	3.00236e+08	3.84769e+08	3.07896e+08	5.96254e+08	6.65356e+08	3.299e+08	2.86619e+08	3.62503e+08	2.56773e+08	3.61779e+08	3.6094e+08	0.156446
MP1186	7.415	89.5065		[M+H]2+													1.4779e+08	1.82892e+08	1.35108e+08	1.10805e+08	1.74301e+08	1.00859e+08	8.76997e+07	1.22652e+08	1.29168e+08	1.30475e+08	1.1551e+08	8.78748e+07	0.17089
MP1187	7.823	89.5065		[M+2H]2+													3.50899e+08	4.30621e+08	5.50141e+08	4.39303e+08	3.52566e+08	3.57886e+08	4.23309e+08	5.10641e+08	3.511e+08	3.4887e+08	4.03967e+08	4.17746e+08	0.0935888
MP1188	3.312	89.5065		[M+CH3OH+H]+													1.66531e+07	3.301e+07	2.00267e+07	1.89562e+07	168245	1.86846e+07	1.6506e+07	6.57724e+06	2.72093e+07	2.72103e+07	3.12705e+07	2.71592e+07	0.0722704
MP1189	0.136	89.5446		[M+H]+													10557.5	52873.5	39832	8610.15	12237.2	5342.31	48523.3	8310.66	62487.1	159165	117838	16473.3	0.702292
MP1190	7.826	89.5565		[M+H]+													50760.8	36703.3	50616.9	26320.5	62914.5	47336.1	36052.4	75276.4	34478.7	37778.3	41644.7	33997.4	0.0956826
MP1191	7.7	89.5655		[M+H]+													66938.2	58438.4	44033.7	68062.3	71400.8	62701.3	20735.9	87774.6	87047.4	73387.3	73329.6	73586.4	0.088594
MP1193	5.377	89.6215		[M+H]+													1.32725e+06	1.93713e+06	2.23765e+06	1.38888e+06	39779	32891.1	39306.8	17760.8	852831	844928	828550	833467	0.0130905
MP1199	5.405	89.7328		[M+H]+													118600	480706	276513	141472	8171.46	131971	16530.8	8769.14	140994	165001	141885	158554	0.0794081
MP1206	5.33	89.8361		[M+H]+													239919	408258	443080	245418	210044	5832.26	165711	7469.12	148963	130850	131215	131158	0.0660002
MP1207	6.592	89.8628		[M+H]+													22337.3	31012.9	31343.8	19970.6	21033.2	21860.2	17086.9	18372.9	23198.2	22571.5	23173.8	22565.9	0.0155853
MP1209	6.035	89.9058		[M+H]+													26548.1	26933.3	29493	20527.2	25917.6	24888.2	25778.6	27619.9	22868.8	22980.4	26419	23202.2	0.0715011
MP1211	7.898	90.0023		[M+H]+													1.4112e+07	8.03412e+06	2.57498e+07	3.27768e+07	1.70715e+07	4.56687e+07	2.38768e+07	2.4807e+07	2.12476e+07	1.86758e+07	2.15024e+07	2.02073e+07	0.0628991
MP1212	6.963	90.0029		[M+H]+													743161	89058.6	22605.9	1.08488e+06	2.31212e+06	2.02371e+06	2.78231e+06	1.54059e+06	135490	1.85851e+06	1.81624e+06	886443	0.702682
MP1213	0.785	90.0081		[M+H]+													3.06123e+06	1.59974e+06	7022.56	1.34273e+06	3.33014e+06	1.67833e+06	3.11476e+06	2.22838e+06	2.68477e+06	2.62139e+06	2.0623e+06	2.0583e+06	0.145637
MP1214	7.786	90.0082		[M+H]+													8.96963e+06	7.16105e+07	5.71483e+07	3.1132e+07	5.83236e+07	1.86841e+07	5.22164e+07	8.74229e+07	3.83327e+07	5.69754e+07	5.63918e+07	5.69419e+07	0.176808
MP1215	3.147	90.0082		[M+H]+													1.50653e+06	1.87076e+06	1.83994e+06	2.28011e+06	1.94193e+06	3.00042e+06	1.78094e+06	2.11361e+06	1.9167e+06	2.16433e+06	1.99639e+06	1.73671e+06	0.0909202
MP1216	3.169	90.0547		[M+H]+													204200	490976	621108	295053	352126	664543	365342	180340	282125	281281	281042	343697	0.104736
MP1218	0.587	90.0547		[M+H]+													448141	1.39106e+06	1.14015e+06	25760.1	461770	932724	611412	1.64998e+06	962017	792721	794851	789677	0.101611
MP1219	1.854	90.0911		[M+H]+													89630.8	225358	126501	125605	171608	136117	115586	158806	194585	277389	338523	314707	0.224132
MP1220	0.617	90.0911		[M+H]+													444397	829475	811948	619140	472243	1.13256e+06	572017	1.32524e+06	665048	664318	642920	617961	0.0343489
MP1221	7.045	90.0911		[M+H]+													207254	319826	182671	33738	962041	267220	420385	331872	51524.6	187987	222544	225836	0.477421
MP1225	5.236	90.172		[M+H]+													62065.7	119530	55892.1	32932.4	63157.6	11637.8	57392.7	42954.6	19857.6	29790.3	21504	21397.6	0.19443
MP1226	6.534	90.174		[M+H]+													22522.9	20048	22441	21673.2	21111.4	22479.5	24580.2	22468.5	19310.2	22179.8	21244.3	21960.2	0.0616304
MP1227	7.666	90.2644		[M+H]+													23345.8	27581.9	26240.4	20261.4	13539.3	33373.2	24832	26713.7	18098.4	21599.9	21584.7	20874	0.0809239
MP1228	3.874	90.2792		[M+ACN+H]+													163400	130428	88572.7	12127.6	27267.3	43601.4	87361.7	26781.8	50463.1	50501.5	53694.4	54101.1	0.0379177
MP1232	3.871	90.321		[M+H-H2O]+													83790.2	50483.2	48161.9	14865.9	46850	16517.3	17093.6	48050.7	40836.1	46938.7	41101.7	40410.7	0.073037
MP1235	7.536	90.355		[M+2H]2+													19533.9	27025.9	22052.5	20926.1	17972.3	23730.7	4742.42	17669.3	15140.6	18878	14933	15443.7	0.115824
MP1244	5.993	90.5003		[M+H]+													42397.9	454739	96942.4	538424	568718	698023	608267	416738	653947	882326	727460	663274	0.144268
MP1245	4.551	90.5066		[M+H]+													3.69627e+06	3.19259e+06	2.0553e+06	3.84757e+06	5.36858e+06	6.5754e+06	4.35935e+06	2.89885e+06	4.02941e+06	4.30851e+06	3.89005e+06	3.903e+06	0.0481795
MP1246	7.443	90.5067		[M+H]2+													3.88646e+08	3.85872e+08	3.77399e+08	3.81579e+08	3.88569e+08	3.818e+08	3.83832e+08	3.84631e+08	3.90397e+08	3.90399e+08	3.82549e+08	3.9045e+08	0.010125
MP1247	0.836	90.5256		[M+H]+													809417	1.1789e+06	1.44477e+06	719436	2.8391e+06	15520.6	305692	268676	1.07824e+06	488927	388351	301812	0.622033
MP1248	4.881	90.5642		[M+H]+													54002.6	20748.2	14558.3	19939.9	10510	7432.41	22273.3	19368.1	19054.5	18178.2	22708.4	22267.1	0.110488
MP1274	0.579	90.9763		[M+Na]+													2.45835e+08	2.47888e+08	2.47217e+08	2.91441e+08	3.11639e+08	4.04196e+08	3.67695e+08	4.04759e+08	3.24095e+08	3.24096e+08	3.24517e+08	3.26813e+08	0.00401217
MP1275	5.766	90.9763		[M+CH3OH+H]+													152772	24439.2	90182.9	128265	128987	404118	221887	476644	176872	172959	60337.2	140385	0.392822
MP1276	4.159	90.9764		[M+H]+													291371	344226	232981	326998	79652.8	486935	346581	435580	378094	338086	338300	338602	0.0570911
MP1277	0.815	90.9764		[M+H]+													787445	624910	1.18293e+06	2.02761e+06	1.8684e+06	3.54313e+06	1.64658e+06	2.96234e+06	1.83206e+06	2.00143e+06	1.83272e+06	1.83353e+06	0.0449776
MP1278	7.245	90.9764		[M+NH4]+													2.67492e+07	2.62813e+07	1.33495e+07	3.00083e+07	2.99671e+07	2.0313e+07	2.98804e+07	3.33564e+07	3.07561e+07	3.18639e+07	2.91748e+07	2.61897e+07	0.0835724
MP1279	0.506	91.0445		[M+NH4]+													1.141e+06	1.10023e+06	601215	637272	784020	658626	222676	475320	681435	681230	681336	743190	0.0443863
MP1280	5.085	91.0532		[M+H]+													163379	124626	277367	129998	303120	154721	178579	159563	176876	154641	159942	154711	0.0651195
MP1281	1.238	91.054		[M+H]+													78060.7	98308.2	108525	57937.8	107273	88041.6	34980.3	124780	94353.3	94284.4	89773.5	89339	0.0299718
MP1282	3.094	91.0546		[M+ACN+H]+													928465	1.07453e+06	806785	850341	96545.4	966794	743613	860562	961950	943133	869725	905114	0.0445709
MP1284	5.427	91.0654		[M+H]+													207379	284650	574046	245390	25446.2	5818.41	160233	72749.5	117152	120204	116340	121177	0.0196725
MP1285	1.025	91.0751		[M+H]+													231189	474456	715593	356745	544701	399659	398456	508165	439344	430158	439335	436976	0.00994886
MP1289	5.515	91.1788		[M+H]+													2.65999e+06	4.71295e+06	4.49937e+06	2.90386e+06	160907	23884	197740	89730.5	1.54785e+06	1.44426e+06	1.55226e+06	1.10732e+06	0.148456
MP1290	6.532	91.1873		[M+H]+													22777.3	26128.8	26086.5	27500.1	21212	29304.4	22616.2	28000.3	22565.9	28952.5	28551.4	28995.5	0.115159
MP1300	5.604	91.2903		[M+H]+													434180	814384	1.20831e+06	411437	518120	428846	17667.8	10913.3	459879	444062	432012	431974	0.0299073
MP1304	4.886	91.5043		[M+H]+													1.09691e+06	35397.7	54450.3	1.42126e+06	1.01879e+06	1.27486e+06	20456.9	1.06206e+06	1.13212e+06	1.14216e+06	1.45797e+06	1.19998e+06	0.123997
MP1305	7.444	91.5044		[M+2H]2+													1.33735e+08	1.367e+08	1.36837e+08	1.39025e+08	1.37907e+08	1.37799e+08	1.35398e+08	1.34185e+08	1.3624e+08	1.37119e+08	1.3299e+08	1.35288e+08	0.0131298
MP1306	0.138	91.5044		[M+H]+													1.43278e+06	451339	726368	541999	1.11538e+06	477749	647308	1.69211e+06	1.32259e+06	1.3235e+06	1.36623e+06	1.41019e+06	0.0307488
MP1307	3.083	91.5045		[M+H]+													252833	262010	482835	230978	345707	399925	332629	516940	355522	356364	307528	321082	0.073616
MP1308	3.308	91.5421		[M+2H]2+													236130	5366.5	48543.4	4667.96	78565.2	484171	663244	1.3046e+06	455052	395380	390866	563964	0.178577
MP1309	0.507	91.5421		[M+CH3OH+H]2+													7.53984e+06	7.40761e+06	4.73139e+06	4.92782e+06	5.53975e+06	4.98722e+06	1.46532e+06	3.29754e+06	4.78289e+06	4.47373e+06	4.78381e+06	4.76259e+06	0.0322644
MP1310	3.122	91.5421		[M+H]+													53613.6	68309.6	29744.3	60514.2	55212.8	109955	125547	339966	66943.4	49885	50206.2	46646.7	0.171425
MP1320	5.457	91.7294		[M+H]+													474490	645062	560240	345537	43670.7	277909	270845	275076	208393	208318	162377	208196	0.11667
MP1331	4.728	92.0062		[M+H]+													60179.4	58371.1	70084.6	67430	80644	59603.8	47838.9	46733.6	72762.2	64868.8	69765.4	12842.1	0.514577
MP1332	7.398	92.0681		[M+H]+													33186.6	13525.9	38058.8	18026.7	7354.44	24436.7	21565.1	28195.6	16067.6	21769.1	18948.5	16240.1	0.14723
MP1334	7.133	92.0704		[M+H]+													82681.1	48814.2	67050.2	65061.8	43965	47338.7	83095	26662	59566.5	79695.3	70983.2	71182.8	0.11741
MP1340	6.334	92.2481		[M+H-H2O]+													19512.5	19143.6	29335.3	19758.1	18835.5	16811.2	21470.6	17103.4	17479.5	17590.2	17793.9	19697	0.0576646
MP1341	6.152	92.2889		[M+Na]+													23480.7	20665.2	27718.9	23633.6	57031.4	24991.1	16754.5	26166.2	18056.3	20598.6	18050.9	21753.4	0.0949951
MP1350	7.443	92.5032		[M+H]2+													1.66205e+07	1.60946e+07	1.64728e+07	1.61982e+07	7.80002e+06	1.41321e+07	1.70177e+07	1.64545e+07	1.67415e+07	1.74881e+07	1.67342e+07	1.69511e+07	0.0208599
MP1351	0.021	92.5033		[M+CH3OH+H]+													477728	571062	1.00953e+06	453722	748949	628918	635852	391526	555004	530587	555120	421733	0.123426
MP1352	6.359	92.5121		[M+2H]2+													24240.1	570181	253869	109197	185841	127910	14355.6	22507	24137.4	24131.8	27772	24266.2	0.0716928
MP1353	0.517	92.5409		[M+CH3OH+H]+													1.23674e+06	1.11046e+06	702756	676474	45133.2	570273	185912	442542	577870	494775	559667	534992	0.0663561
MP1354	5.777	92.6226		[M+H]+													157908	313641	346630	114322	126004	13492.3	102549	102549	29122.7	52346.8	46563.8	47816.4	0.232022
MP1358	6.866	92.6996		[M+H]+													22302.4	30992.7	21855.3	20883.8	15722.2	20738.2	15439	20269.5	22706.8	24345	22724.1	23250.1	0.0330317
MP1360	5.828	92.7361		[M+H]+													3.35291e+06	5.14361e+06	5.63796e+06	3.32592e+06	190266	25932.3	208263	115955	2.15469e+06	2.11768e+06	2.0493e+06	2.09726e+06	0.0208748
MP1362	5.757	92.8476		[M+H]+													1.13213e+06	1.7905e+06	1.95423e+06	1.15872e+06	13996.3	32615.5	15177.6	34044.8	627190	629205	602341	602403	0.0242702
MP1363	6.805	92.8622		[M+H]+													26192.5	23233.1	25782	29826.9	28453.3	31648.5	19596.4	28640.1	24231.2	22480	29619.6	22279.7	0.138947
MP1366	0.564	92.9805		[M+H]+													503857	179310	320088	480877	356161	1.09453e+06	753538	543173	884200	870087	990194	889567	0.0606165
MP1367	6.881	92.9815		[M+H]+													11092.6	25643.1	19080.1	172503	44315.9	11505.1	24713	90455.2	44006.8	72209.1	51801.3	70020	0.231933
MP1368	7.508	93.0049		[M+H]+													180288	149486	53958.2	156993	86437.8	82077	75131.8	206811	136976	75473.1	139639	120937	0.2511
MP1371	5.595	93.1007		[M+H]+													17365	20436.5	19741	14238.5	22807.5	22570	19625.3	22371.8	17251.9	17235.3	17415.1	19274.3	0.0556419
MP1372	6.456	93.1089		[M+H-H2O]+													34853.2	23848.9	22756.3	23848.9	21228.3	17532.3	24746	20153.1	22571.9	22542.1	23026.8	24513.9	0.0400229
MP1374	0.57	93.2051		[M+H]+													5147.68	40489.7	5031.11	59636.9	95599.7	1.35374e+06	664721	1.4462e+06	244875	235665	191875	245859	0.111275
MP1375	5.962	93.2866		[M+H]+													613020	869050	1.06238e+06	566526	19758.4	18047.2	25007	375315	369049	360813	275456	337468	0.126094
MP1381	5.73	93.398		[M+NH4]+													44480.8	32273.3	110432	34762.9	41992.8	24911.5	20261.7	36637.3	24965.6	28440.2	20484.7	28940.6	0.151901
MP1384	0.198	93.4934		[M+H]+													184843	8094.6	23712.6	24782.6	27036.5	75869.7	41048.3	54976.1	28506.5	18508.2	17009.1	21504.1	0.238708
MP1385	7.493	93.503		[M+H]+													3.9745e+06	4.16238e+06	4.23239e+06	4.90788e+06	5.57727e+06	4.79955e+06	1.89447e+06	40805.5	4.20001e+06	4.24233e+06	3.04334e+06	4.24785e+06	0.150951
MP1400	0.486	93.9916		[M+H]+													23579.6	38935.7	34441.9	18743.2	21628.4	24788.2	30942	17379.8	38307.3	32237.8	12357.6	36799	0.400755
MP1401	3.703	94.0448		[M+2H]2+													6.14162e+06	205329	1.433e+07	222240	2.48346e+07	1.45497e+07	2.20152e+08	3.97626e+08	2.14796e+07	1.696e+07	1.74012e+07	2.57797e+07	0.20193
MP1402	5.193	94.0448		[M+Na]+													9073.53	990.499	4723.63	7944.25	1496.01	2884.23	3207.19	2441.89	1299.44	34235.2	3508.66	1118.2	1.61014
MP1403	3.43	94.0448		[M+2H]2+													2.81788e+08	397425	1.35132e+08	377043	4.35835e+06	1.8314e+07	2.56589e+08	4.08922e+07	2.42369e+08	2.05568e+08	2.06749e+08	2.45288e+08	0.0968329
MP1404	0.51	94.0448		[M+2H]2+													5.79889e+08	5.85969e+08	3.57907e+08	3.51518e+08	4.38286e+08	3.52472e+08	1.20842e+08	2.37068e+08	3.68964e+08	3.63907e+08	3.63907e+08	3.66312e+08	0.00659174
MP1405	0.806	94.0448		[M+2H]2+													1.11631e+07	1.12595e+07	7.78681e+06	8.10289e+06	8.87174e+06	7.93355e+06	2.9658e+06	3.90381e+06	8.00084e+06	7.60508e+06	7.60554e+06	7.60615e+06	0.0256507
MP1406	7.424	94.0448		[M+CH3OH+H]2+													2.02076e+07	1.8687e+07	1.86674e+07	1.86897e+07	1.84111e+07	1.87395e+07	1.82016e+07	1.90648e+07	1.86473e+07	1.86488e+07	1.74885e+07	1.8661e+07	0.0316946
MP1407	6.543	94.0648		[M+H]+													60203.2	86938.5	104932	114772	58666.8	174830	53207.8	118348	93445.8	105063	107469	42345.8	0.349622
MP1408	1.045	94.0649		[M+H-H2O]+													958681	981861	838401	833931	1.19383e+06	678598	813676	638112	840126	825184	820296	819245	0.0116552
MP1415	6.046	94.2934		[M+H-H2O]+													2.16897e+06	1.45234e+06	2.29611e+06	2.11828e+06	26263.7	26025.7	23249.1	64155.2	1.20918e+06	1.20909e+06	1.14086e+06	1.13432e+06	0.0352772
MP1417	6.24	94.3571		[M+NH4]+													23282.6	22825.3	22285.8	21978.8	22088.1	24111.5	24548.8	23766.6	22944.7	22758.3	26368.2	22622.4	0.0760934
MP1419	6.055	94.4049		[M+H]+													432902	963925	1.2681e+06	614932	15034.2	47379.9	358641	42719.5	253232	203440	228224	189580	0.128402
MP1423	5.296	94.5131		[M+H]+													204886	696924	663080	297657	12575	12941.4	7997.93	163849	119330	115181	89596.8	119356	0.129115
MP1427	4.94	94.6051		[M+H]+													13082.6	14988.9	22811.3	35303.8	19441.1	24118	10271.9	21733.9	16028.4	16779.6	13044.3	16105.5	0.10747
MP1430	6.382	94.6799		[M+H]+													24947.2	25134.6	26531.8	25958.3	25158.8	11955.8	58112.4	23381.2	20555.7	20097.4	19000.9	19464.1	0.0346508
MP1434	5.508	94.728		[M+H]+													245568	439700	327419	151116	17796.7	11220.1	122114	10831.2	101423	101298	82597	96127.9	0.0929112
MP1439	6.03	94.8361		[M+H]+													23719.7	96245.1	30151.8	63222.4	38509	11529.5	9463.87	29941.2	34781	31444	35414.2	31822.1	0.0606262
MP1440	6.464	94.8438		[M+H]+													63414.2	160716	24067.5	75329.6	17109.5	35649.5	36681.1	12127.5	35193.3	35058.4	40616.8	41180.5	0.0879016
MP1441	6.217	94.8439		[M+H]+													43343.3	110060	31675.3	22888.4	50955.8	39028.4	39028.2	14638.8	41658.3	54062.7	50649.4	55976.3	0.125467
MP1445	6.412	94.9193		[M+H-H2O]+													21792	20466.9	20672.5	21964.7	19773.3	18575.7	22700.9	15299.4	20967.5	21505.7	21432.8	19455.6	0.0457519
MP1448	0.576	94.9802		[M+ACN+H]+													233706	345934	144030	668608	825135	1.24428e+06	1.27366e+06	1.4038e+06	937381	989569	858140	912499	0.0590787
MP1449	7.35	95.0436		[M+NH4]2+													2.85129e+06	324723	2.9578e+06	3.36606e+06	78274.5	208111	3.00058e+06	437003	2.30126e+06	2.30825e+06	260193	2.28938e+06	0.569765
MP1450	3.323	95.0436		[M+NH4]2+													4.2321e+07	28934.7	1.7737e+06	65072.3	8.7838e+06	3.67481e+07	2.6311e+07	7.54758e+07	3.3632e+07	2.20189e+07	3.71624e+07	3.33191e+07	0.208601
MP1451	4.071	95.0436		[M+2H]2+													2.54322e+07	22169.1	19035.4	10940.7	229032	230170	3.46368e+07	67577.5	963364	577773	600791	679692	0.251521
MP1452	0.51	95.0436		[M+NH4]2+													8.70042e+07	8.85649e+07	5.38706e+07	5.34924e+07	6.81525e+07	5.27067e+07	1.79227e+07	3.54414e+07	5.57251e+07	5.48874e+07	5.48869e+07	5.52458e+07	0.00719375
MP1453	3.446	95.0852		[M+H-H2O]+													520565	497842	381692	378552	472429	637454	431003	439038	548506	566339	593354	531120	0.0474708
MP1457	5.96	95.2674		[M+ACN+H]+													21820.6	16708.8	19224.3	17708.5	16057	87233	13472.7	19621.9	17224	21711.1	25263.4	24508.6	0.164059
MP1461	7.318	95.5013		[M+Na]+													224775	196189	64215.6	239263	211680	273980	252620	50998.8	77196	114054	138935	153251	0.275614
MP1462	3.544	95.5453		[M+H]+													1.18452e+06	444419	635980	25901.4	40522.4	805182	1.03178e+06	1.25757e+06	191276	138640	121013	162988	0.198813
MP1469	6.982	95.7087		[M+H]+													20712.7	17385.5	30371.1	20419.8	66005.9	26181	26181	20267	21541	17637.2	20104.5	19378.8	0.0825521
MP1478	0.028	96.0105		[2M+NH4]2+													794276	511478	820141	1.7458e+06	1.58537e+06	1.67598e+06	1.56163e+06	522750	1.23867e+06	1.24053e+06	1.37196e+06	1.30741e+06	0.0492491
MP1479	7.583	96.0106		[M+ACN+H]2+													982759	1.63077e+06	1.52037e+06	2.50079e+06	1.42594e+06	1.47181e+06	2.36398e+06	1.05655e+06	1.39307e+06	1.23542e+06	1.36622e+06	1.42707e+06	0.0618256
MP1483	5.465	96.0707		[M+H]+													551004	1.64652e+06	1.53693e+06	456695	20320.6	6916.05	24399.8	13775.1	362176	392020	320650	419762	0.113592
MP1484	4.588	96.0749		[M+H]+													89480.5	147468	95900.2	253400	15411.2	7380.25	48917.2	6291.54	59123.4	58417.5	73661.4	58388.4	0.120467
MP1487	5.799	96.182		[M+H]+													65977.2	154343	258755	77054.3	11898.1	36843	14002.6	11638.8	23693.1	34543.3	24452.5	29402.5	0.179509
MP1491	5.514	96.2854		[M+H]+													175506	364466	236497	66512.6	12074.7	9395.65	10142.2	6962.73	35286.5	54920.8	54796.7	51290.3	0.190412
MP1493	5.715	96.2896		[M+H]+													16587.2	21773.3	219271	61668.1	11195.2	45391.9	8904.32	6483.01	20573.4	19402.1	19394.6	21605.4	0.0525273
MP1502	0.502	96.5343		[M+H]+													65551.7	56325.4	56239.5	56882.7	32603.3	23325.6	46845.3	46904.1	45190.4	46109.9	45203.1	49761.9	0.0466744
MP1509	0.578	96.7551		[M+Na]+													506059	772919	469105	862020	833597	223733	939528	506580	762740	746761	732113	763037	0.0197057
MP1521	0.612	96.9215		[M+2H]2+													1.12622e+07	1.4463e+07	2.125e+07	2.49006e+07	2.43604e+07	4.01862e+07	2.60993e+07	3.22368e+07	2.69821e+07	2.65174e+07	2.69839e+07	2.68365e+07	0.00818183
MP1522	0.799	96.9215		[M+H]+													1.25861e+07	9.92409e+06	1.5465e+07	1.65498e+07	1.94935e+07	2.98757e+07	2.09007e+07	2.31618e+07	1.79295e+07	1.87992e+07	1.91271e+07	1.91195e+07	0.0300902
MP1523	0.741	96.9215		[M+H]+													1.20016e+07	1.14584e+07	1.43194e+07	1.79894e+07	1.5847e+07	2.49484e+07	1.56952e+07	1.92835e+07	1.64795e+07	1.6603e+07	1.67275e+07	1.65581e+07	0.00625184
MP1524	0.11	96.9612		[M+H]+													617192	695370	396530	548135	471944	607187	526499	517390	583123	480698	506304	584703	0.0988287
MP1525	5.067	97.0338		[M+H]+													196509	175855	275319	453048	289821	271980	194840	89762.4	259817	228046	240370	232467	0.0585062
MP1528	5.702	97.0758		[M+H]+													167111	163330	128855	91086.8	206581	258410	449751	507802	241861	226282	241835	227362	0.0370684
MP1529	5.061	97.1009		[M+NH4]+													232023	248034	33774.1	256696	193329	218958	29443.8	7381.75	173072	169166	169245	181901	0.0345424
MP1540	3.05	97.5141		[M+H]+													928215	937525	1.06087e+06	685796	304184	705600	693098	888651	989143	972793	904491	1.00898e+06	0.0468461
MP1541	0.024	97.5141		[M+2H]2+													2.95491e+07	2.73335e+07	2.72248e+07	2.79335e+07	2.64041e+07	2.62062e+07	2.68967e+07	2.35331e+07	2.84802e+07	2.84801e+07	2.75325e+07	2.84411e+07	0.0165657
MP1542	0.631	97.5141		[M+H]+													2.7933e+06	1.8618e+06	748262	409788	1.62062e+06	3.31225e+06	1.32114e+06	681153	834553	277221	1.02978e+06	152336	0.740844
MP1543	7.781	97.5141		[M+ACN+H]+													1.82227e+07	1.58595e+07	6.27545e+06	2.0408e+07	1.10006e+07	1.7671e+07	1.63696e+07	1.56739e+07	1.14778e+07	1.92888e+07	1.95564e+07	1.99162e+07	0.231369
MP1544	7.346	97.5141		[M+NH4]+													1.52141e+06	1.71115e+06	6.27621e+06	614856	53282.8	1.04604e+06	422620	26143.8	985054	2.01601e+06	164505	139514	1.07121
MP1545	3.324	97.5142		[M+2H]2+													611606	994334	780279	1.20068e+06	841506	52309.2	899401	608251	903348	755399	844558	905869	0.0827578
MP1548	5.791	97.6281		[M+H]+													1.41546e+06	1.26234e+06	2.59877e+06	1.39389e+06	21259.4	930193	41486.1	12284.3	943823	961920	909061	926113	0.024337
MP1560	5.781	97.7394		[M+H]+													255512	729654	823102	540206	10427	254009	24856.8	250328	167764	178743	106834	179251	0.218892
MP1573	0.021	97.9685		[M+Na]+													1.4824e+06	1.75588e+06	1.54025e+06	1.66545e+06	1.64133e+06	1.67279e+06	1.81597e+06	1.59017e+06	1.55408e+06	1.87242e+06	1.59752e+06	1.71308e+06	0.0844565
MP1574	3.678	98.0133		[M+Na]+													239329	95565.1	81770.4	326152	344386	205896	243829	218712	152041	239586	228710	241008	0.197612
MP1575	7.437	98.0133		[M+H]+													1.16685e+07	1.22882e+07	1.19601e+07	1.20851e+07	1.24585e+07	1.19822e+07	1.17397e+07	1.22792e+07	1.16781e+07	1.1702e+07	1.14066e+07	1.16947e+07	0.012294
MP1576	0.508	98.0133		[M+ACN+H]+													1.93289e+06	3.8796e+06	4.68838e+06	2.76526e+06	1.5901e+06	632050	3.4195e+06	1.15191e+06	2.3806e+06	2.40945e+06	2.40881e+06	2.29751e+06	0.0222378
MP1577	0.617	98.0574		[M+H]+													1.44604e+06	2.16874e+06	732287	629926	895689	600524	846493	789840	716136	686873	701123	716369	0.0200029
MP1578	6.75	98.071		[M+H]+													19941	40588.5	47985.9	50279.7	46806.9	51150	305199	61523.3	44386	42531.3	50669.7	46731.1	0.0761641
MP1579	3.044	98.0962		[M+NH4]+													619556	504046	841279	626393	583673	644123	599998	583815	552780	548917	507295	552061	0.0408002
MP1581	6.061	98.1786		[M+H]+													45860.5	74087.6	98042.3	35324.2	18011	31208.3	25202.9	28499.6	21434.8	23371.5	26861.5	17709.1	0.170951
MP1587	5.142	98.3225		[M+H]+													31716.8	77710.5	38093.7	36283.5	57619.4	33471.9	34977	67376.1	135916	138558	128264	134104	0.0325304
MP1589	6.949	98.4022		[M+NH4]+													25135.4	24584.1	23362.6	22038	15335.3	15971.1	22635.5	14589	17989.3	21345.2	21289.9	19858.8	0.078466
MP1593	7.63	98.4903		[M+H-H2O]+													69945.7	70389	118455	19625.8	32099.5	16184.4	40065.5	23212.5	66976	58740	58248.5	71949.7	0.103993
MP1594	0.102	98.492		[M+H]+													104146	40749.6	49456.6	27171.6	8900.29	29196.2	93213.6	25282.2	71247.4	70518.2	52986.6	70816.3	0.134685
MP1595	0.024	98.5117		[M+CH3OH+H]2+													5.45028e+08	4.58731e+08	4.7652e+08	4.71838e+08	4.8467e+08	4.43455e+08	4.77355e+08	4.2905e+08	5.13764e+08	5.06045e+08	5.00491e+08	5.00542e+08	0.0124104
MP1596	7.406	98.5117		[M+H]2+													4.87879e+07	6.01667e+07	4.38177e+07	6.02138e+07	3.51728e+07	2.90213e+07	2.92819e+07	3.78602e+07	4.23747e+07	4.29971e+07	3.01759e+07	3.71939e+07	0.155547
MP1597	0.822	98.5118		[M+H]+													2.97638e+07	90793.6	3.96182e+07	4.84065e+07	3.44871e+07	2.35823e+07	5.1945e+07	1.92167e+07	3.87837e+07	4.21734e+07	3.424e+07	3.23888e+07	0.119973
MP1598	7.832	98.5118		[M+H]+													5.4613e+08	4.21029e+08	5.15325e+08	4.34982e+08	1.74017e+08	3.99203e+08	1.73298e+08	4.57295e+08	5.18934e+08	6.53915e+08	4.91001e+08	5.58111e+08	0.128095
MP1599	3.209	98.5118		[M+ACN+H]+													2.12128e+07	2.06348e+07	1.4555e+07	1.95266e+07	1.53001e+07	1.7846e+07	2.13209e+07	6.66638e+06	2.39934e+07	2.15429e+07	2.30296e+07	2.18337e+07	0.0500024
MP1600	7.539	98.5118		[M+H]+													99451.4	638937	1.85363e+08	9.7656e+06	1.21604e+08	1.0646e+08	16635.5	1.66625e+07	108202	5.91119e+06	7.35213e+06	178551	1.11941
MP1610	6.517	98.7818		[M+H]+													18786.7	51277.1	26818.9	27095.1	17445.4	23783.9	47913.1	24470.2	19146.6	19165.6	19599.6	20621.1	0.0351954
MP1616	0.613	98.9184		[M+H]2+													3.22673e+06	4.09216e+06	6.27115e+06	7.07681e+06	6.97523e+06	1.20761e+07	7.95447e+06	9.47509e+06	7.95599e+06	7.74771e+06	7.93869e+06	7.95623e+06	0.012865
MP1617	0.797	98.9185		[M+NH4]+													3.57221e+06	2.84381e+06	3.94046e+06	5.1083e+06	5.28131e+06	8.11101e+06	5.76591e+06	6.64207e+06	4.88587e+06	4.88595e+06	4.96306e+06	4.90589e+06	0.00742945
MP1618	0.742	98.9185		[M+Na]+													3.53506e+06	3.60162e+06	4.5552e+06	5.72574e+06	5.19595e+06	7.62533e+06	4.81161e+06	5.43795e+06	5.21227e+06	5.18877e+06	5.18871e+06	5.24005e+06	0.00468548
MP1621	7.444	98.9615		[M+H-H2O]+													1.19391e+06	1.25676e+06	1.2426e+06	704046	1.46918e+06	1.14949e+06	1.36223e+06	1.0781e+06	1.1606e+06	1.13797e+06	1.27992e+06	1.26966e+06	0.0603652
MP1622	5.727	98.9839		[M+H]+													62556.3	364980	82630.4	149061	182695	120684	66569.4	29479.4	136348	144607	134729	144767	0.0379947
MP1625	3.089	99.0136		[M+H]+													681412	646477	1.36821e+06	963779	980534	749735	1.0257e+06	707330	754992	781830	683961	686384	0.0678335
MP1626	6.277	99.055		[M+H]+													24023.1	91108.1	36208.7	95935.1	676297	135125	191633	253269	43664.3	47731.6	77361.7	56523.2	0.266674
MP1627	1.019	99.0662		[M+NH4]+													275006	378907	297573	297843	274592	274324	281425	275442	292348	300709	292321	292343	0.0142166
MP1628	3.075	99.0802		[M+H]+													264378	247034	212368	239758	165279	226871	184493	142237	215663	230986	216454	225443	0.0332285
MP1629	6.358	99.0914		[M+H]+													32765.7	37304.5	64436	67023	467984	141350	64297.4	95914.1	70047.1	38651	69691	63417.8	0.245639
MP1634	6.313	99.1756		[M+H]+													21626.4	1.58574e+06	21088	19232.2	13919.4	14212.9	14792.3	18134	22588.9	21038.4	31017	21267.3	0.197774
MP1635	5.931	99.1853		[M+H]+													2.07949e+06	3.07441e+06	3.31052e+06	2.03628e+06	17788.8	30370	39062.6	23278	1.2442e+06	1.24745e+06	1.17343e+06	1.17164e+06	0.0350146
MP1636	6.081	99.2162		[M+H]+													27888.1	24535.6	51579.5	24091.5	34562.3	32238.8	24624	31006.2	27946.5	23767.5	27797.5	27150.6	0.0736024
MP1640	6.016	99.2967		[M+H]+													513175	789656	684360	633419	27317	361963	386650	386650	370680	295176	322885	294083	0.111887
MP1645	6.237	99.4218		[M+NH4]+													22604.3	24187.1	26413.2	21789.4	28066.7	29128.2	26171.2	27374.7	24620.4	27813	24707	25162.6	0.0590537
MP1647	5.09	99.5119		[2M+NH4]+													895394	2.90392e+06	1.98094e+06	1.2861e+06	2.03037e+06	362998	2.27071e+06	1.72601e+06	205064	949347	368019	952475	0.629199
MP1648	0.931	99.5119		[M+H]+													4.07374e+06	4.4603e+06	1.89645e+06	2.88008e+06	3.8638e+06	4.36376e+06	4.14232e+06	2.35631e+06	3.44773e+06	2.65756e+06	3.38343e+06	3.46051e+06	0.119842
MP1649	7.445	99.5119		[M+NH4]2+													1.57615e+08	1.5228e+08	1.58368e+08	1.56151e+08	1.5973e+08	1.55612e+08	1.56991e+08	1.57903e+08	1.57304e+08	1.59337e+08	1.57256e+08	1.57272e+08	0.0065257
MP1650	3.117	99.5119		[M+H]+													671207	878031	659082	1.06722e+06	1.3652e+06	783494	994576	501534	1.12761e+06	988635	1.10793e+06	871298	0.116042
MP1651	6.493	99.6424		[M+H-H2O]+													594827	259233	1.28827e+06	57464.5	181234	477389	566351	304958	585165	357885	399619	581055	0.247898
MP1652	7.001	99.7538		[M+H]+													353130	378033	1.69989e+06	570451	315209	350068	37674.1	634471	389979	446529	350063	355811	0.114831
MP1653	6.195	99.7539		[M+ACN+H]+													136516	74743.9	90443.5	73634.8	121424	413112	19704.6	125995	54414.7	40875.3	45280.3	42394.6	0.132573
MP1665	7.507	99.9695		[M+H]+													173785	144825	183720	148071	120359	136591	119052	300228	78126.1	113704	67021.5	121833	0.280455
MP1666	0.508	100.024		[M+H]+													2.75774e+06	2.70873e+06	1.65406e+06	1.70943e+06	2.09964e+06	1.53054e+06	458887	1.0902e+06	1.76258e+06	1.72007e+06	1.71482e+06	1.71515e+06	0.0133534
MP1668	0.817	100.039		[M+NH4]+													836762	150919	120680	158359	131146	136959	150471	109832	232192	262943	243250	233825	0.0581258
MP1670	0.061	100.075		[M+H]+													3.00961e+07	7.30743e+07	4.44488e+07	4.44554e+07	2.59411e+07	3.16857e+07	3.99354e+07	3.58726e+07	4.32338e+07	4.6087e+07	4.76152e+07	2.86983e+07	0.209278
MP1674	7.147	100.112		[M+H]+													1.00656e+06	870924	354821	360451	249530	263746	927322	1.03702e+06	652635	564197	481561	489262	0.145781
MP1675	3.835	100.112		[M+H]+													166866	28804.6	111260	54504.4	135685	147883	107628	172034	163570	159446	154267	142270	0.0596124
MP1676	6.783	100.193		[M+H]+													305403	159553	346747	165866	57539.4	14995.3	24522.9	128140	192873	194448	165009	144554	0.137518
MP1677	6.626	100.193		[M+H]+													40016	263059	81434.5	28663.1	17432.9	21357.5	22103.6	190225	153415	208850	32504.7	26380	0.859454
MP1678	6.932	100.304		[M+Na]+													61076.3	72410.8	65437.2	46501.1	89563.7	109768	50442.2	225680	153439	159067	68969.8	71430.2	0.439349
MP1688	4.695	100.501		[M+H]+													584194	1.1239e+06	841563	678535	714693	498261	845219	667080	853745	658940	237965	581233	0.440817
MP1689	4.501	100.51		[M+CH3OH+H]2+													483993	379044	388895	375036	382507	401895	378141	455181	365221	366007	416502	412158	0.0722719
MP1690	7.445	100.51		[M+NH4]2+													6.07075e+07	5.74424e+07	5.93701e+07	6.16341e+07	5.99217e+07	6.02234e+07	5.93417e+07	5.66299e+07	5.99623e+07	5.99621e+07	5.92751e+07	5.92627e+07	0.00671459
MP1691	0.557	100.51		[M+NH4]+													1.18825e+06	1.6286e+06	675829	800224	1.46177e+06	954984	759997	627715	637620	1.33e+06	1.14626e+06	974595	0.288186
MP1702	6.348	100.743		[M+NH4]+													968694	717195	969440	402150	18001.9	375205	377325	16223.9	241864	243270	243580	285130	0.0833487
MP1704	6.61	100.854		[M+H]+													125537	75054.4	300935	35306.6	20443.2	16475.2	19609.3	25444.2	52002.1	37719.5	36241.8	37992.7	0.180102
MP1706	0.614	100.917		[M+H]+													258834	296583	492301	387763	464972	843579	604566	816080	516838	481048	524906	524973	0.0409161
MP1707	0.738	100.917		[M+H]+													311324	280823	262897	295655	302415	296844	293224	337517	271775	315608	278505	304574	0.0712796
MP1708	0.025	100.932		[M+H]+													1.51043e+06	1.44712e+06	1.42997e+06	1.34474e+06	808316	1.02929e+06	746599	1.38271e+06	1.55934e+06	1.55905e+06	1.50349e+06	1.53117e+06	0.0173466
MP1709	7.445	100.957		[M+NH4]+													361557	329025	320135	248887	275221	327781	361129	268875	258441	340722	338727	278279	0.138133
MP1710	5.649	100.957		[2M+H]+													76246.2	157533	205520	21337.6	221169	66209.2	61324.7	8806.05	22967.2	12726.1	12783.2	12342.7	0.34059
MP1711	2.201	101.011		[M+2H]2+													227104	44510.5	20854.1	60782.5	48540.8	33897.6	25676	269501	115806	147491	112889	118694	0.129514
MP1714	4.518	101.071		[M+H]+													3.84832e+06	4.5598e+06	3.81402e+06	3.60616e+06	4.78525e+06	8.29136e+06	6.87086e+06	7.5054e+06	3.70551e+06	3.16411e+06	3.33707e+06	3.7099e+06	0.0785256
MP1716	1.066	101.079		[M+H]+													3.0689e+06	2.70042e+06	3.02176e+06	2.4661e+06	2.56966e+06	2.6892e+06	3.1038e+06	2.97033e+06	2.09751e+06	2.40057e+06	2.39887e+06	2.38367e+06	0.064058
MP1717	3.142	101.079		[M+H]+													2.38263e+06	1.93973e+06	1.71281e+06	1.23159e+06	3.12002e+06	2.72552e+06	2.38454e+06	2.39622e+06	2.1656e+06	2.16545e+06	2.33262e+06	2.2236e+06	0.0354561
MP1718	1.06	101.107		[M+H]+													462607	508255	515019	580103	590996	535110	383166	478410	505197	520003	502695	503015	0.0162663
MP1719	0.963	101.107		[M+H]+													336662	350104	339129	449366	446150	482537	314815	366866	410190	402339	401582	408692	0.0107784
MP1720	0.622	101.108		[M+H]+													61246.3	9776.36	6734.9	34309.4	36772.3	6356.03	13869.8	25681.9	33402.5	26122.6	26297.4	28804.4	0.118393
MP1721	5.644	101.177		[M+H]+													69175.6	217620	54703.2	63561	15990.5	40777.3	15596.5	28360.3	22244	22783.8	30926.9	35264.6	0.228908
MP1729	7.49	101.508		[M+NH4]+													6.09233e+06	5.18218e+06	6.96189e+06	7.68449e+06	7.56224e+06	7.04804e+06	7.48977e+06	5.20679e+06	6.05962e+06	1.79348e+06	6.10241e+06	6.0509e+06	0.427636
MP1730	0.179	101.509		[M+ACN+H]+													626728	203214	401935	177330	117739	180367	237334	335333	184370	118800	128934	190089	0.23716
MP1731	6.757	101.636		[M+H]+													22587.5	34373.6	29645.5	59095.4	16261.2	13257.6	24891.7	56235.6	21302.9	21980.7	21945.4	18651.5	0.0751948
MP1734	5.46	101.734		[M+Na]+													19535.3	21410.8	28998.6	34409.7	24271.9	16363.6	7965.86	32568.7	22077.2	22119.1	22106.3	18957.8	0.0737344
MP1742	7.179	101.965		[M+H]+													49352	39086.6	33525.2	20979.1	27955.3	17904.8	7777.54	51557.1	25783.5	20316.7	28328.4	19596.3	0.180323
MP1743	6.831	101.965		[2M+H]+													81286.6	21182.3	44939.2	44378.4	44803.4	14606.8	131759	18581.7	24778.3	31337.3	26263.9	24225.6	0.121586
MP1744	0.474	102.034		[M+H]+													2.02097e+06	2.80147e+06	1.1883e+06	1.16836e+06	1.94459e+06	669880	1.47203e+06	737170	1.60141e+06	1.877e+06	1.87007e+06	1.87604e+06	0.0755843
MP1746	4.209	102.034		[M+Na]+													1.93136e+06	2.51267e+06	1.67107e+06	3.06842e+06	1.59575e+06	3.4695e+06	1.87749e+06	1.99402e+06	3.08143e+06	3.08922e+06	3.28673e+06	3.07604e+06	0.0326776
MP1747	7.862	102.034		[M+H]+													7.10971e+06	1.22609e+07	2.0461e+06	3.34241e+06	1.36922e+07	3.04375e+06	8.03385e+06	5.18751e+06	3.47236e+06	3.52026e+06	4.81117e+06	3.37885e+06	0.179032
MP1751	7.27	102.074		[M+H]+													3.31804e+06	3.87429e+06	3.14396e+06	2.46437e+06	1.50047e+06	1.49734e+06	4.81659e+06	5.7855e+06	3.13275e+06	2.61802e+06	3.26052e+06	2.8972e+06	0.0949811
MP1752	3.306	102.09		[M+H]+													1.46427e+06	1.57205e+06	1.71235e+06	1.78392e+06	1.38822e+06	1.65332e+06	1.58483e+06	1.65604e+06	1.62733e+06	1.59605e+06	1.5689e+06	1.61525e+06	0.0159091
MP1753	7.229	102.127		[M+H]+													3.08676e+06	1.16165e+06	2.86481e+06	1.51381e+06	807950	1.31247e+06	2.87953e+06	1.73855e+06	1.79975e+06	1.44167e+06	1.81933e+06	1.70896e+06	0.102782
MP1758	7.041	102.36		[M+H]+													27255.6	34518	36130.5	28958.3	31129	16569.2	16395.2	26714.8	37086.6	37766.2	29723.5	37488.1	0.109016
MP1761	6.069	102.413		[M+ACN+H]+													25433.9	30917.8	40118.6	25176.7	28305.6	23284.8	25543.3	35146.4	23825.7	21548.7	23900.3	22417.8	0.0498259
MP1764	7.507	102.552		[M+H]+													45600.3	53351.5	44328.9	13711.5	50524.7	49569.8	62314.2	49839.6	49390.5	40472.4	41957.5	42337.1	0.0914776
MP1765	3.727	102.552		[M+H]+													296635	5084.41	62217.4	27151.5	25229.7	68071.2	45815.7	678437	191634	82068.3	88887.1	149075	0.407042
MP1766	0.51	102.552		[2M+NH4]2+													8.49056e+06	8.78562e+06	5.13043e+06	5.11421e+06	6.55419e+06	4.81292e+06	1.7959e+06	3.30396e+06	5.37078e+06	5.44438e+06	5.32463e+06	5.32473e+06	0.010531
MP1767	5.813	102.624		[2M+NH4]+													20828.5	28842.6	30494.8	12036.8	28614.6	8127.24	21769.3	26471	28686	24783.1	25751.5	28008.9	0.0687357
MP1772	6.484	102.735		[2M+NH4]+													21837.9	51194.8	31500.2	21557.7	32395	23698.2	22125.2	25651.4	18160.1	18164.3	18487.4	22368.6	0.106489
MP1776	6.458	102.946		[M+NH4]+													24318.7	27765.3	28755.3	35049.1	15230.7	16844.9	14160	32364.1	30233.6	31135	26961.9	28654.4	0.0627716
MP1780	3.328	103.05		[M+H]+													2.18014e+06	14272.5	151487	15592.9	191665	678392	972895	2.50281e+06	1.35522e+06	993732	580451	1.07552e+06	0.319992
MP1781	0.703	103.05		[M+2H]2+													22841.9	14710.3	72137.5	30894.3	22745.7	307030	77304.5	28904.1	35046.5	13864.4	61136.7	151588	0.926761
MP1782	3.096	103.055		[M+H]+													932381	979368	682906	844065	771899	873717	970335	1.32376e+06	881050	846813	906417	851289	0.0319701
MP1783	4.349	103.074		[M+CH3OH+H]2+													317625	330475	799029	592327	14935.4	125329	5094.02	61207	127633	127419	151803	127077	0.0915122
MP1784	4.781	103.074		[M+H]+													95131.1	136065	166959	302855	97886.1	105899	129528	111477	82469	72499.4	87296.6	87397.4	0.0849283
MP1785	3.21	103.075		[M+H]+													230270	352391	439622	349715	86868.9	111051	74228.1	40220.4	162538	165438	165422	162637	0.0100071
MP1786	6.657	103.075		[M+H]+													350255	404193	418460	336173	302666	360643	353527	312846	458210	471167	472393	466611	0.0137543
MP1787	6.711	103.086		[M+H]+													29770.8	11333.2	28620.3	20140.7	10539.9	22160.1	11935	35300.7	14520.5	14380.4	21196.8	14508.7	0.208281
MP1801	5.874	103.432		[M+H]+													20262.5	34011.2	32782.2	20896.2	10032	22811.5	21271.7	22296.7	20184.7	22171.5	23063.8	23234.6	0.0631303
MP1802	3.99	103.552		[M+NH4]+													86939.9	14434.9	24527.5	120914	38155.4	7154.24	32272.3	41551.6	22805.7	26350.6	26380.4	9566.4	0.37529
MP1825	6.044	103.956		[M+H]+													31548.1	54566	36498.5	97453.7	51059.4	71351.6	79404.1	19927.5	28570.6	28487.4	31916.9	28575.3	0.0573955
MP1826	5.845	103.956		[M+H]+													36131.6	92450.2	68194.5	27233.4	11920.4	14976.2	23428.5	56263.9	59638.2	59667.6	59550.9	67548	0.0643638
MP1830	5.273	104.077		[M+NH4]+													117412	422095	440877	97581.5	135699	105160	210072	173147	125747	141046	124669	139814	0.0663581
MP1831	0.438	104.082		[M+CH3OH+H]+													1.31686e+06	67524.2	1.04467e+06	1.24501e+06	505596	244581	248226	44318.8	546540	380481	299655	336508	0.278814
MP1832	5.963	104.107		[M+H]+													49895.8	34711.1	18630.6	50487.9	111419	127722	71503.4	107906	38899.8	40547.7	40479.3	52196	0.143094
MP1833	6.837	104.107		[M+CH3OH+H]+													696934	69431.3	55388.7	329810	223813	642321	267205	248044	265213	184191	178828	180783	0.207814
MP1835	6.399	104.169		[M+H]+													24131.1	51525.4	84993.4	62203.7	23582.2	12664.5	14317.1	35648.3	23394.7	24798.6	23751.4	23386.3	0.0279447
MP1839	0.58	104.309		[M+H]+													195959	143066	132013	253378	371266	68788.5	395787	158549	541668	458924	479463	459381	0.0805688
MP1844	6.684	104.424		[M+H]+													23574	32759.5	24570.4	34700.3	23955.1	17113.7	25599	114934	21768.8	28468.7	30354.1	30434.2	0.147489
MP1845	6.077	104.428		[M+H]+													24751.3	23013.1	22739.9	12586.9	23692.1	22138.9	23771.8	15118.4	25484.3	25499.7	28204.3	25590.6	0.0511766
MP1848	6.527	104.473		[M+H]+													32909.7	37790.3	39010.1	23358.3	22932.4	23516	26964.7	16770.3	24626.3	22564.5	25635.5	25405.3	0.0568999
MP1849	7.613	104.532		[M+NH4]+													182839	24868.4	14350.1	20717.9	65069.5	25675.3	24423.6	27149.9	40306.7	40472.4	36812.1	22657.5	0.240722
MP1871	7.589	105.016		[M+H]+													1.42188e+06	1.1016e+06	2.27113e+06	2.58104e+06	2.34692e+06	2.19776e+06	972825	1.87571e+06	2.00227e+06	2.17985e+06	1.96298e+06	1.97487e+06	0.0498766
MP1872	0.025	105.016		[M+2H]2+													1.83826e+06	2.00957e+06	1.94722e+06	1.71372e+06	1.7591e+06	1.92331e+06	2.2237e+06	1.67132e+06	1.92917e+06	1.88262e+06	2.02223e+06	2.08429e+06	0.0458612
MP1873	0.558	105.037		[M+ACN+H]+													191047	377419	298694	352234	266485	301614	335719	325943	330539	338140	324548	369025	0.0580592
MP1874	3.859	105.037		[M+H]+													69008.1	396974	168300	153115	403501	295440	151113	474650	235847	220404	233445	235810	0.0319867
MP1875	0.771	105.037		[M+Na]+													38668.2	90722.9	12425.5	38831.7	199062	50858.9	44936.7	112475	33248.4	57081.8	30958	36584.1	0.303221
MP1876	7.178	105.042		[M+H]+													895816	1.15157e+06	128193	48489.1	2.31067e+06	1.71315e+06	2.42807e+06	2.42315e+06	3.15524e+06	2.75976e+06	3.03484e+06	2.65283e+06	0.0806261
[truncated: 32,096 more rows]

## Sheet: ECM N day
ID	m/z	rt(s)	Name	adduct	HMDB	KEGG	SuperClass	Class	SubClass	EM7D-1	EM7D-2	EM7D-3	EM7D-4	EM14D-1	EM14D-2	EM14D-3	EM14D-4	EM21D-1	EM21D-2	EM21D-3	EM28D-1	EM28D-2	EM28D-3	QC-4	QC-1	QC-3	QC-2
[truncated: 1,165 more rows]

[truncated: 1 more sheets: CK N P]
